# Supplementary material for: Enantioselective synthesis of 1-aminoindene derivatives via asymmetric Brønsted acid catalysis
Source: Royal Society of Chemistry journal article supplement (doi:10.1039/d1cc03568a), 2021-01-01
Supplement: d1cc03568a1.pdf [file d1cc03568a1.pdf]

# Enantioselective synthesis of 1-aminoindene derivatives via asymmetric Brønsted acid catalysis

Xiang Wu,<sup>\*,a,c</sup> Du Ding,<sup>§,b</sup> Ying Zhang,<sup>§,b</sup> Hua-Jie Jiang,<sup>b</sup> Tao Wang,<sup>a</sup> and Li-Ping Zhao<sup>a</sup>

a. Anhui Province Key Laboratory of Advanced Catalytic Materials and Reaction Engineering, School of Chemistry and Chemical Engineering, Hefei University of Technology, Hefei 230009, China.

b. Department of Chemistry, University of Science and Technology of China, Hefei, 230026, China

c. Guangdong Provincial Key Laboratory of Catalysis, Southern University of Science and Technology, Shenzhen 518055, China.

|                                                            |     |
|------------------------------------------------------------|-----|
| 1. General information.....                                | S2  |
| 2. Procedure for the synthesis of substrates 1 and 3.....  | S2  |
| 3. In situ imine formation/cyclisation .....               | S7  |
| 4. Characterizations for the substrates 1 and 3.....       | S7  |
| 5. General procedure for the synthesis of 2 and 4.....     | S14 |
| 6. Characterizations for the products 2 and 4.....         | S14 |
| 7. Procedure for the synthesis of 7.....                   | S23 |
| 8. Characterizations for the products 5, 6 and 7.....      | S23 |
| 9. X-ray Single Crystal Data for 2e .....                  | S25 |
| 10. X-ray Single Crystal Data for 4e.....                  | S26 |
| 11. NMR spectra for substrates, products, 5, 6 and 7. .... | S27 |
| 12. HPLC spectra for products, 5, 6 and 7.....             | S89 |

## 1. General information

General data: NMR spectra were recorded on Bruker-400 MHz spectrometer or Bruker-500 MHz spectrometer. Chemical shifts ( $\delta$ ) are given in ppm relative to TMS. The residual solvent signals were used as references and the chemical shifts converted to the TMS scale (CDCl<sub>3</sub>:  $\delta$ H = 7.26 ppm,  $\delta$ C = 77.16 ppm). The high resolution mass spectra were recorded on a Thermo LTQ Orbitrap XL (ESI+). Enantiomeric excesses were measured on Waters-Breeze (2487 Dual  $\lambda$  Absorbance Detector and 1525 Binary HPLC Pump, UV detection monitored at 254 nm or 230nm). Chiralpak AD-H and IE columns were purchased from Daicel Chemical Industries, LTD. Optical rotations were measured at 589 nm (sodium D line) by using a Perkin-Elmer 343 polarimeter.

Materials: Analytical grade solvents for the column chromatography were used as received. Starting materials were purchased from commercial suppliers (Aldrich, Alfa, TCI, Adamas-beta, Energychemical, and Accela) and used as supplied unless otherwise stated. All solvents were purified and dried according to standard methods prior to use, unless stated otherwise.

## 2. Procedure for the synthesis of substrates 1 and 3.

General procedure for the synthesis of substrates 1a, 1q-w.

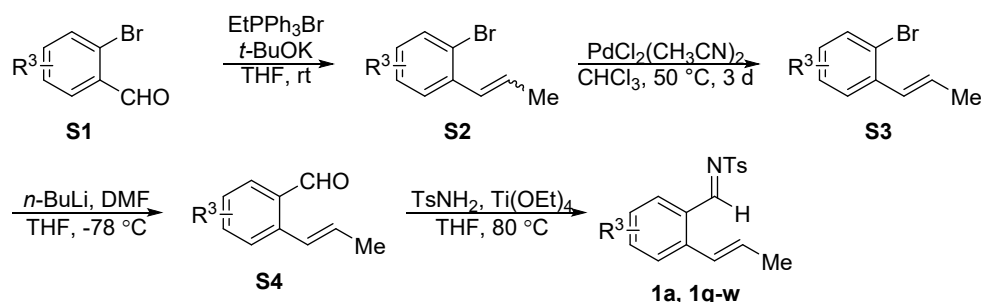

The mixture of ethyltriphenylphosphonium bromide (5.569 g, 15 mmol), *t*-BuOK (1.683 g, 15 mmol), THF (50 mL) was added to a 100 mL flask under nitrogen atmosphere and stirred at 0 °C for 30 minutes. Then the reaction mixture was warmed to room temperature and stirred for 1.5 hours. Subsequently, 2-bromobenzaldehydes **S1** (5 mmol) was added dropwise to the reaction mixture and stirred for additional 6 hours. Then the reaction was quenched by water (50 mL) and THF was removed under reduced pressure. The residue was filtered and extracted with Ethyl acetate (50 mL  $\times$  3). The combined organic layer was washed with brine (50 mL  $\times$  2) and dried over anhydrous Na<sub>2</sub>SO<sub>4</sub>. After the solvent was removed under reduced pressure, the crude product was purified by flash column chromatography on silica gel and eluted with petroleum ether to afford **S2**.

To a solution of **S2** (4 mmol) in chloroform (20 mL) was added bis(acetonitrile)-dichloropalladium (0.041 g, 0.16 mmol). The solution was stirred at 50 °C for 3 days. The reaction mixture was passed through a plug of silica gel (Et<sub>2</sub>O as eluent) and concentrated to give **S3**.

*n*-BuLi (1.6 M solution in hexanes, 4.4 mmol) was added slowly to a solution of **S3** (4 mmol) in THF (20 mL) at -78 °C, then stirred for 30 min at this temperature. DMF (4.8 mmol) was then added dropwise to the mixture and stirred for a further 5 h. Saturated aqueous NH<sub>4</sub>Cl (25 mL) was added and the mixture was extracted with Et<sub>2</sub>O (30 mL  $\times$  3). The combined organic phase was washed with saturated aqueous NaCl and dried over MgSO<sub>4</sub>, then concentrated in vacuo. The crude residue

was purified by silica chromatography (EtOAc: Petroleum ether = 1: 25 - 1: 10) to give the aldehydes **S4**.

A 50 mL vial equipped with a stirrer was charged with aldehyde **S4** (5 mmol), sulfonamide (6 mmol), dry THF (20 mL), and Ti(OEt)<sub>4</sub> (5 mL). The vial was closed and heated at 80 °C for 24 h. After completion, the mixture was cooled to room temperature and quenched with water (50 mL). The mixture was extracted with CH<sub>2</sub>Cl<sub>2</sub> (50 mL × 3). The combined organic layer was dried over Na<sub>2</sub>SO<sub>4</sub> and concentrated in vacuo. The crude product was purified by flash column chromatography (EtOAc: Petroleum ether = 1: 10 - 1: 4) on silica gel to afford **1a**, **1q-w**.

#### General procedure for the synthesis of substrates **1b**, **1i-k**.

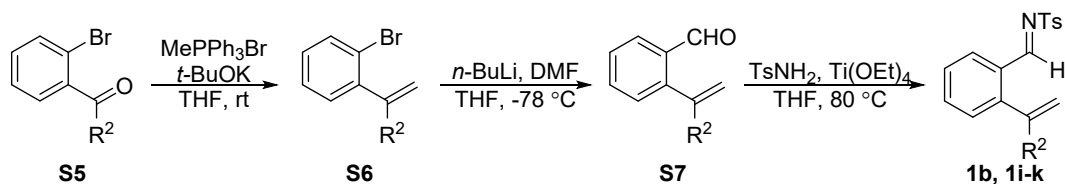

The mixture of methyltriphenylphosphonium bromide (5.344 g, 15 mmol), *t*-BuOK (1.683 g, 15 mmol), THF (50 mL) was added to a 100 mL flask under nitrogen atmosphere and stirred at 0 °C for 30 minutes. Then the reaction mixture was warmed to room temperature and stirred for 1.5 hours. Subsequently, **S5** (5 mmol) was added dropwise to the reaction mixture and stirred for additional 6 hours. Then the reaction was quenched by water (50 mL) and THF was removed under reduced pressure. The residue was filtered and extracted with Ethyl acetate (50 mL × 3). The combined organic layer was washed with brine (50 mL × 2) and dried over anhydrous Na<sub>2</sub>SO<sub>4</sub>. After the solvent was removed under reduced pressure, the crude product was purified by flash column chromatography on silica gel and eluted with petroleum ether to afford **S6**.

*n*-BuLi (1.6 M solution in hexanes, 4.4 mmol) was added slowly to a solution of **S6** (4 mmol) in THF (20 mL) at -78 °C, then stirred for 30 min at this temperature. DMF (4.8 mmol) was then added dropwise to the mixture and stirred for a further 5 h. Saturated aqueous NH<sub>4</sub>Cl (25 mL) was added and the mixture was extracted with Et<sub>2</sub>O (30 mL × 3). The combined organic phase was washed with saturated aqueous NaCl and dried over MgSO<sub>4</sub>, then concentrated in vacuo. The crude residue was purified by silica chromatography (EtOAc: Petroleum ether = 1: 25 - 1: 10) to give the aldehydes **S7**.

A 50 mL vial equipped with a stirrer was charged with aldehyde **S7** (5 mmol), sulfonamide (6 mmol), dry THF (20 mL), and Ti(OEt)<sub>4</sub> (5 mL). The vial was closed and heated at 80 °C for 24 h. After completion, the mixture was cooled to room temperature and quenched with water (50 mL). The mixture was extracted with CH<sub>2</sub>Cl<sub>2</sub> (50 mL × 3). The combined organic layer was dried over Na<sub>2</sub>SO<sub>4</sub> and concentrated in vacuo. The crude product was purified by flash column chromatography (EtOAc: Petroleum ether = 1: 10 - 1: 4) on silica gel to afford **1b**, **1i-k**.

#### General procedure for the synthesis of substrates **1c-h**, **1o-p**.

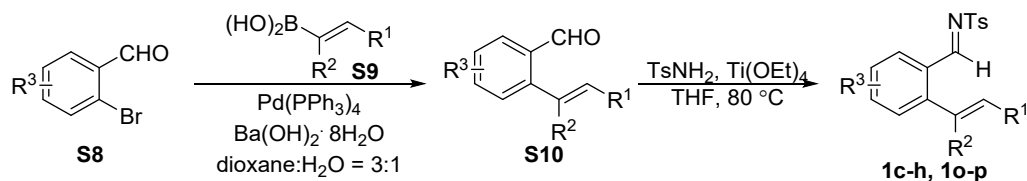

Under N<sub>2</sub> gas, 2-bromobenzaldehydes **S8** was added to the solution of boronic acids **S9** (10

mmol), Pd(PPh<sub>3</sub>)<sub>4</sub> (0.25 mmol) and Ba(OH)<sub>2</sub>·8H<sub>2</sub>O (10 mmol) in dioxane (30 mL) and H<sub>2</sub>O (10 mL). The mixture was refluxed for 40 h. After completion, the mixture was cooled to room temperature and quenched with HCl (1M, 40 mL). The mixture was extracted with CH<sub>2</sub>Cl<sub>2</sub> (50 mL × 3). The combined organic layer was dried over Na<sub>2</sub>SO<sub>4</sub> and concentrated in vacuo. The crude product was purified by flash column chromatography (EtOAc: Petroleum ether = 1: 25) on silica gel to afford **S10**.

A 50 mL vial equipped with a stirrer was charged with aldehyde **S10** (5 mmol), sulfonamide (6 mmol), dry THF (20 mL), and Ti(OEt)<sub>4</sub> (5 mL). The vial was closed and heated at 80 °C for 24 h. After completion, the mixture was cooled to room temperature and quenched with water (50 mL). The mixture was extracted with CH<sub>2</sub>Cl<sub>2</sub> (50 mL × 3). The combined organic layer was dried over Na<sub>2</sub>SO<sub>4</sub> and concentrated in vacuo. The crude product was purified by flash column chromatography (EtOAc: Petroleum ether = 1: 10 - 1: 4) on silica gel to afford **1c-h**, **1o-p**.

#### Procedure for the synthesis of substrate **1l**.

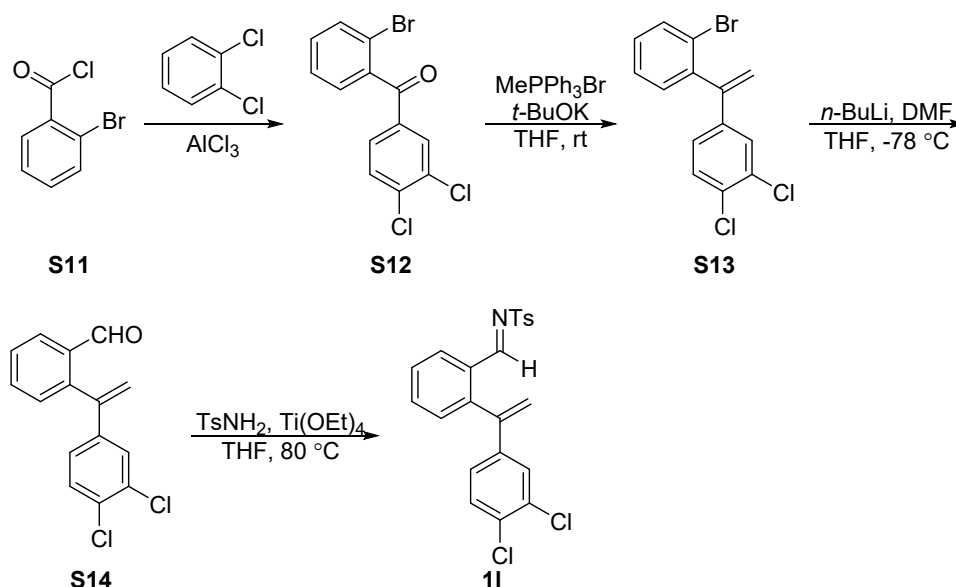

A mixture of 1,2-dichlorobenzene (5 mL, 6.53 g, 44.4 mmol), 3-chlorobenzoyl chloride (4.358 g, 20 mmol) and anhydrous aluminium chloride (5.334 g, 40 mmol) was stirred at 120 °C for 3 h. The reaction mixture was poured onto crushed ice (50 g). The mixture was extracted with CH<sub>2</sub>Cl<sub>2</sub> (50 mL × 3). The combined organic layer was dried over Na<sub>2</sub>SO<sub>4</sub> and concentrated in vacuo. The crude product was purified by flash column chromatography (EtOAc: Petroleum ether = 1: 50) on silica gel to afford **S12**.

The mixture of methyltriphenylphosphonium bromide (5.344 g, 15 mmol), *t*-BuOK (1.683 g, 15 mmol), THF (50 mL) was added to a 100 mL flask under nitrogen atmosphere and stirred at 0 °C for 30 minutes. Then the reaction mixture was warmed to room temperature and stirred for 1.5 hours. Subsequently, **S12** (5 mmol) was added dropwise to the reaction mixture and stirred for additional 6 hours. Then the reaction was quenched by water (50 mL) and THF was removed under reduced pressure. The residue was filtered and extracted with Ethyl acetate (50 mL × 3). The combined organic layer was washed with brine (50 mL × 2) and dried over anhydrous Na<sub>2</sub>SO<sub>4</sub>. After the solvent was removed under reduced pressure, the crude product was purified by flash column chromatography on silica gel and eluted with petroleum ether to afford **S13**.

*n*-BuLi (1.6 M solution in hexanes, 4.4 mmol) was added slowly to a solution of **S13** (4 mmol)



in THF (20 mL) at -78 °C, then stirred for 30 min at this temperature. DMF (4.8 mmol) was then added dropwise to the mixture and stirred for a further 5 h. Saturated aqueous NH<sub>4</sub>Cl (25 mL) was added and the mixture was extracted with Et<sub>2</sub>O (30 mL × 3). The combined organic phase was washed with saturated aqueous NaCl and dried over MgSO<sub>4</sub>, then concentrated in vacuo. The crude residue was purified by silica chromatography (EtOAc: Petroleum ether = 1: 25 - 1: 10) to give the aldehydes **S14**.

A 50 mL vial equipped with a stirrer was charged with aldehyde **S14** (5 mmol), sulfonamide (6 mmol), dry THF (20 mL), and Ti(OEt)<sub>4</sub> (5 mL). The vial was closed and heated at 80 °C for 24 h. After completion, the mixture was cooled to room temperature and quenched with water (50 mL). The mixture was extracted with CH<sub>2</sub>Cl<sub>2</sub> (50 mL × 3). The combined organic layer was dried over Na<sub>2</sub>SO<sub>4</sub> and concentrated in vacuo. The crude product was purified by flash column chromatography (EtOAc: Petroleum ether = 1: 10) on silica gel to afford **1l**.

#### Procedure for the synthesis of substrate **1m**.

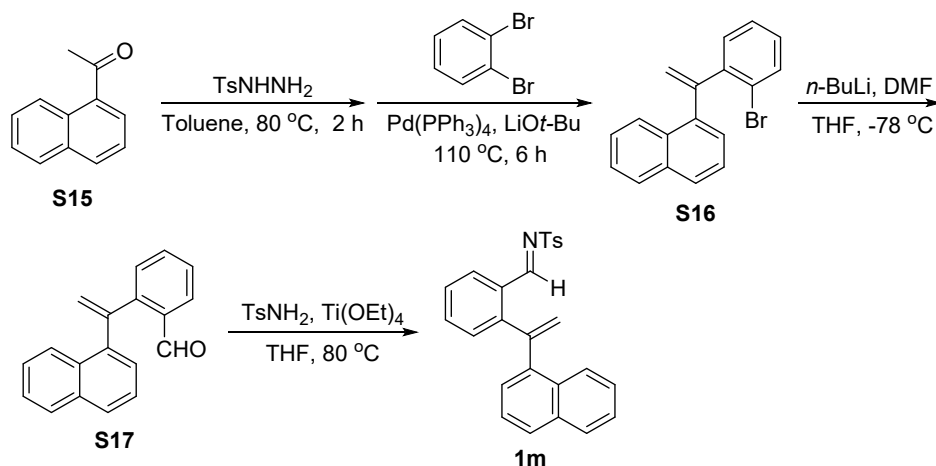

The mixture of acetylnaphthalene **S15** (1.70 g, 10 mmol) and tosylhydrazide (2.326g, 12.5 mmol) in 50 mL of toluene was stirred at 80 °C for 2 h. Lithium tert-butoxide (2.0 g, 25 mmol), 1,2-dibromobenzene (20 mmol) and Pd(PPh<sub>3</sub>)<sub>4</sub> (0.577 g, 0.5 mmol) were added to the reaction mixture. The system was heated under reflux at 90 °C for 6 h. After the completion of the reaction, the reaction mixture was allowed to cool to room temperature. Saturated aqueous NaHCO<sub>3</sub> (50 mL) was added and the mixture was extracted with Et<sub>2</sub>O (50 mL × 3). The combined organic phase was washed with saturated aqueous NaCl and dried over MgSO<sub>4</sub>, then concentrated in vacuo. The crude product was purified by flash column chromatography on silica gel and eluted with petroleum ether to afford **S16**.

*n*-BuLi (1.6 M solution in hexanes, 4.4 mmol) was added slowly to a solution of **S16** (4 mmol) in THF (20 mL) at -78 °C, then stirred for 30 min at this temperature. DMF (4.8 mmol) was then added dropwise to the mixture and stirred for a further 5 h. Saturated aqueous NH<sub>4</sub>Cl (25 mL) was added and the mixture was extracted with Et<sub>2</sub>O (30 mL × 3). The combined organic phase was washed with saturated aqueous NaCl and dried over MgSO<sub>4</sub>, then concentrated in vacuo. The crude residue was purified by silica chromatography (EtOAc: Petroleum ether = 1: 25) to give the aldehydes **S17**.

A 50 mL vial equipped with a stirrer was charged with aldehyde **S17** (5 mmol), sulfonamide (6 mmol), dry THF (20 mL), and Ti(OEt)<sub>4</sub> (5 mL). The vial was closed and heated at 80 °C for 24 h. After completion, the mixture was cooled to room temperature and quenched with water (50 mL).

The mixture was extracted with CH<sub>2</sub>Cl<sub>2</sub> (50 mL × 3). The combined organic layer was dried over Na<sub>2</sub>SO<sub>4</sub> and concentrated in vacuo. The crude product was purified by flash column chromatography (EtOAc: Petroleum ether = 1: 10) on silica gel to afford **1m**.

**Procedure for the synthesis of substrate 1n.**

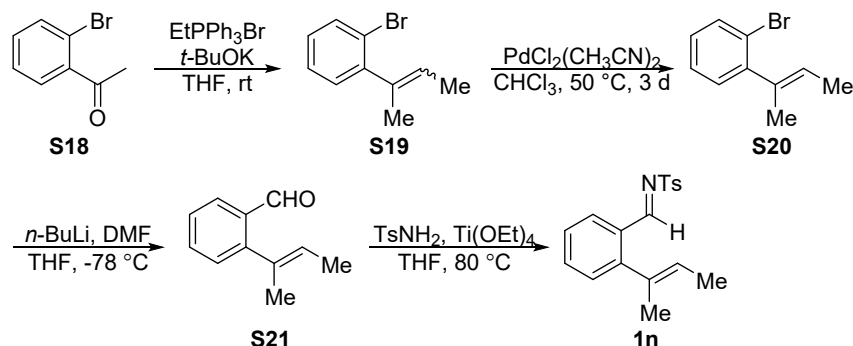

The mixture of ethyltriphenylphosphonium bromide (5.569 g, 15 mmol), *t*-BuOK (1.683 g, 15 mmol), THF (50 mL) was added to a 100 mL flask under nitrogen atmosphere and stirred at 0 °C for 30 minutes. Then the reaction mixture was warmed to room temperature and stirred for 1.5 hours. Subsequently, 1-(2-bromophenyl)ethan-1-one **S18** (5 mmol) was added dropwise to the reaction mixture and stirred for additional 6 hours. Then the reaction was quenched by water (50 mL) and THF was removed under reduced pressure. The residue was filtered and extracted with Ethyl acetate (50 mL × 3). The combined organic layer was washed with brine (50 mL × 2) and dried over anhydrous Na<sub>2</sub>SO<sub>4</sub>. After the solvent was removed under reduced pressure, the crude product was purified by flash column chromatography on silica gel and eluted with petroleum ether to afford **S19**.

To a solution of **S19** (4 mmol) in chloroform (20 mL) was added bis(acetonitrile)-dichloropalladium (0.041 g, 0.16 mmol). The solution was stirred at 50 °C for 3 days. The reaction mixture was passed through a plug of silica gel (Et<sub>2</sub>O as eluent) and concentrated to give **S20**.

*n*-BuLi (1.6 M solution in hexanes, 4.4 mmol) was added slowly to a solution of **S20** (4 mmol) in THF (20 mL) at -78 °C, then stirred for 30 min at this temperature. DMF (4.8 mmol) was then added dropwise to the mixture and stirred for a further 5 h. Saturated aqueous NH<sub>4</sub>Cl (25 mL) was added and the mixture was extracted with Et<sub>2</sub>O (30 mL × 3). The combined organic phase was washed with saturated aqueous NaCl and dried over MgSO<sub>4</sub>, then concentrated in vacuo. The crude residue was purified by silica chromatography (EtOAc: Petroleum ether = 1: 25) to give the aldehydes **S21**.

A 50 mL vial equipped with a stirrer was charged with aldehyde **S21** (5 mmol), sulfonamide (6 mmol), dry THF (20 mL), and Ti(OEt)<sub>4</sub> (5 mL). The vial was closed and heated at 80 °C for 24 h. After completion, the mixture was cooled to room temperature and quenched with water (50 mL). The mixture was extracted with CH<sub>2</sub>Cl<sub>2</sub> (50 mL × 3). The combined organic layer was dried over Na<sub>2</sub>SO<sub>4</sub> and concentrated in vacuo. The crude product was purified by flash column chromatography (EtOAc: Petroleum ether = 1: 10) on silica gel to afford **1n**.

**General procedure for the synthesis of substrate 3a-e.**

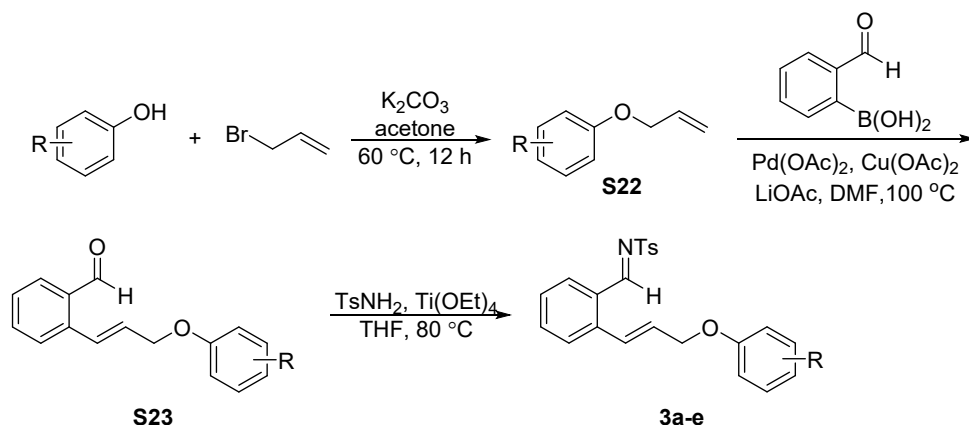

Potassium carbonate (20 mmol) was added to the solution of phenols (10 mmol) and allyl bromide (20 mmol) in acetone. The solution was stirred at 60 °C for 12 h. After reaction completion volatiles evaporated and the crude was partitioned between water and ethyl acetate (80 mL  $\times$  3). The combined organic layer was dried over Na<sub>2</sub>SO<sub>4</sub> and concentrated in vacuo. The crude product was purified by flash column chromatography (Petroleum ether) on silica gel to afford **S22**.

Under N<sub>2</sub> gas, to the solution of 2-formylphenylboronic acid (12 mmol), Pd(OAc)<sub>2</sub> (1 mmol), Cu(OAc)<sub>2</sub> (20 mmol) and LiOAc (30 mmol) in DMF (30 mL) was added **S22** (10 mmol). The mixture was heated to 100 °C and stirred for a further 12 h. The mixture was cooled to room temperature. Et<sub>2</sub>O (80 mL) and water (80 mL) were added. The aqueous phase was extracted with Et<sub>2</sub>O (50 mL  $\times$  3). The combined organic layer was washed with water (80 mL), dried over Na<sub>2</sub>SO<sub>4</sub> and concentrated in vacuo. The crude product was purified by flash column chromatography (EtOAc: Petroleum ether = 1: 10) on silica gel to afford **S23**.

A 50 mL vial equipped with a stirrer was charged with aldehyde **S23** (5 mmol), sulfonamide (6 mmol), dry THF (20 mL), and Ti(OEt)<sub>4</sub> (5 mL). The vial was closed and heated at 80 °C for 24 h. After completion, the mixture was cooled to room temperature and quenched with water (50 mL). The mixture was extracted with CH<sub>2</sub>Cl<sub>2</sub> (50 mL  $\times$  3). The combined organic layer was dried over Na<sub>2</sub>SO<sub>4</sub> and concentrated in vacuo. The crude product was purified by flash column chromatography (EtOAc: Petroleum ether = 1: 10) on silica gel to afford **3a-e**.

### 3. In situ imine formation/cyclisation

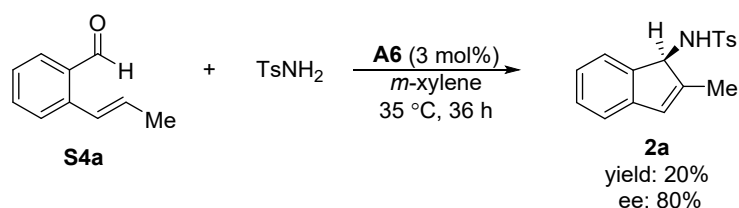

### 4. Characterizations for the substrates 1 and 3.

4-methyl-N-((E)-2-((E)-prop-1-en-1-yl)benzylidene)benzenesulfonamide (**1a**)

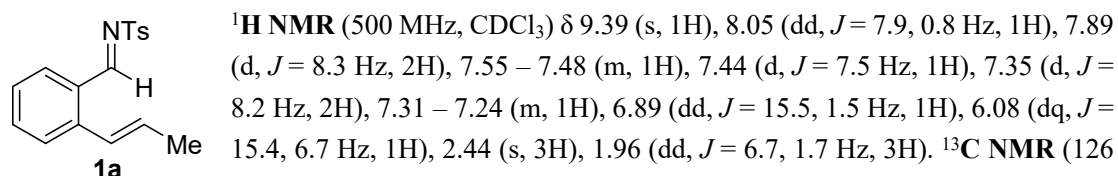

MHz, CDCl<sub>3</sub>)  $\delta$  168.61, 144.61, 142.90, 135.39, 134.61, 133.66, 129.89, 129.46, 128.83, 128.12, 127.81, 127.29, 126.60, 21.77, 19.17. **HRMS** (ESI)  $m/z$  (M+H)<sup>+</sup>: calculated for C<sub>17</sub>H<sub>18</sub>NO<sub>2</sub>S: 300.1058, found: 300.1056.

(E)-4-methyl-N-(2-vinylbenzylidene)benzenesulfonamide (**1b**)

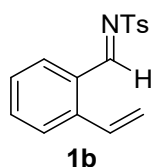

**<sup>1</sup>H NMR** (400 MHz, CDCl<sub>3</sub>)  $\delta$  9.41 (s, 1H), 8.07 (dd,  $J$  = 7.9, 1.3 Hz, 1H), 7.92 – 7.86 (m, 2H), 7.54 (ddd,  $J$  = 9.6, 7.3, 1.3 Hz, 2H), 7.39 – 7.32 (m, 3H), 7.31 – 7.22 (m, 1H), 5.63 (dd,  $J$  = 17.3, 1.0 Hz, 1H), 5.56 (dd,  $J$  = 11.0, 1.0 Hz, 1H), 2.44 (s, 3H). **<sup>13</sup>C NMR** (101 MHz, CDCl<sub>3</sub>)  $\delta$  168.53, 144.70, 142.52, 135.42, 134.66, 132.94, 129.95, 129.36, 128.21, 127.82, 121.07, 21.81. **HRMS** (ESI)  $m/z$  (M+H)<sup>+</sup>: calculated for C<sub>16</sub>H<sub>16</sub>NO<sub>2</sub>S: 286.0902, found: 286.0901.

4-methyl-N-((E)-2-((E)-styryl)benzylidene)benzenesulfonamide (**1c**)

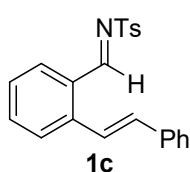

**<sup>1</sup>H NMR** (500 MHz, CDCl<sub>3</sub>)  $\delta$  9.38 (s, 1H), 8.04 (dd,  $J$  = 7.9, 1.1 Hz, 1H), 7.90 (d,  $J$  = 8.3 Hz, 2H), 7.68 (d,  $J$  = 10.1 Hz, 1H), 7.65 (s, 1H), 7.58 (dt,  $J$  = 7.9, 1.2 Hz, 1H), 7.50 (d,  $J$  = 7.3 Hz, 2H), 7.41 – 7.38 (m, 2H), 7.37 – 7.35 (m, 1H), 7.34 – 7.32 (m, 3H), 6.93 (d,  $J$  = 16.1 Hz, 1H), 2.42 (s, 3H). **<sup>13</sup>C NMR** (126 MHz, CDCl<sub>3</sub>)  $\delta$  168.48, 144.71, 141.89, 136.60, 135.21, 135.16, 134.56, 130.96, 129.93, 129.36, 128.92, 128.71, 128.21, 127.88, 127.70, 127.10, 124.21, 21.77. **HRMS** (ESI)  $m/z$  (M+H)<sup>+</sup>: calculated for C<sub>22</sub>H<sub>20</sub>NO<sub>2</sub>S: 362.1215, found: 362.1211.

4-methyl-N-((E)-2-((E)-3-phenylprop-1-en-1-yl)benzylidene)benzenesulfonamide (**1d**)

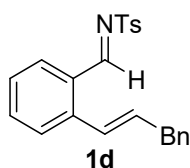

**<sup>1</sup>H NMR** (400 MHz, CDCl<sub>3</sub>)  $\delta$  9.39 (s, 1H), 8.05 – 8.00 (m, 1H), 7.86 (d,  $J$  = 8.3 Hz, 2H), 7.52 – 7.45 (m, 2H), 7.39 – 7.28 (m, 5H), 7.28 – 7.22 (m, 3H), 6.98 (d,  $J$  = 15.5 Hz, 1H), 6.19 (dt,  $J$  = 15.5, 6.9 Hz, 1H), 3.62 (d,  $J$  = 6.9 Hz, 2H), 2.42 (s, 3H). **<sup>13</sup>C NMR** (101 MHz, CDCl<sub>3</sub>)  $\delta$  168.70, 144.61, 142.33, 139.36, 136.83, 135.41, 134.54, 130.00, 129.90, 129.12, 128.80, 128.79, 128.14, 127.97, 127.60, 126.78, 126.58, 39.80, 21.77. **HRMS** (ESI)  $m/z$  (M+H)<sup>+</sup>: calculated for C<sub>23</sub>H<sub>22</sub>NO<sub>2</sub>S: 376.1371, found: 376.1364.

4-methyl-N-((E)-2-((E)-pent-1-en-1-yl)benzylidene)benzenesulfonamide (**1e**)

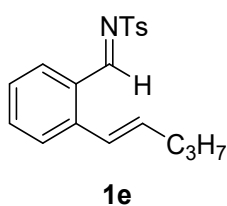

**<sup>1</sup>H NMR** (500 MHz, CDCl<sub>3</sub>)  $\delta$  9.38 (s, 1H), 8.04 (dd,  $J$  = 7.9, 0.9 Hz, 1H), 7.89 (d,  $J$  = 8.3 Hz, 2H), 7.54 – 7.48 (m, 1H), 7.45 (d,  $J$  = 7.6 Hz, 1H), 7.34 (d,  $J$  = 8.1 Hz, 2H), 7.31 – 7.24 (m, 1H), 6.87 (d,  $J$  = 15.6 Hz, 1H), 6.05 (dt,  $J$  = 15.5, 7.0 Hz, 1H), 2.44 (s, 3H), 2.29 – 2.20 (m, 2H), 1.59 – 1.46 (m, 2H), 0.99 (t,  $J$  = 7.4 Hz, 3H). **<sup>13</sup>C NMR** (126 MHz, CDCl<sub>3</sub>)  $\delta$  168.69, 144.59, 142.95, 139.01, 135.41, 134.53, 129.88, 129.62, 128.95, 128.13, 127.91, 127.28, 125.54, 35.59, 22.41, 21.76, 13.87. **HRMS** (ESI)  $m/z$  (M+H)<sup>+</sup>: calculated for C<sub>19</sub>H<sub>22</sub>NO<sub>2</sub>S: 328.1371, found: 328.1371.

N-((E)-2-((E)-2-cyclopropylvinyl)benzylidene)-4-methylbenzenesulfonamide (**1f**)

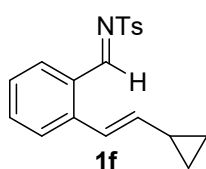

**<sup>1</sup>H NMR** (400 MHz, CDCl<sub>3</sub>)  $\delta$  9.42 (s, 1H), 8.02 (dd,  $J$  = 7.9, 1.1 Hz, 1H), 7.89 (d,  $J$  = 8.3 Hz, 2H), 7.52 – 7.45 (m, 1H), 7.41 (d,  $J$  = 7.3 Hz, 1H), 7.34 (d,  $J$  = 8.1 Hz, 2H), 7.26 – 7.20 (m, 1H), 6.97 (d,  $J$  = 15.5 Hz, 1H), 5.54 (dd,  $J$  =

15.5, 9.3 Hz, 1H), 2.43 (s, 3H), 1.67 (qt,  $J = 9.1, 4.7$  Hz, 1H), 0.95 – 0.86 (m, 2H), 0.61 – 0.53 (m, 2H).  $^{13}\text{C}$  NMR (101 MHz,  $\text{CDCl}_3$ )  $\delta$  168.71, 144.56, 143.08, 142.75, 135.52, 134.54, 129.88, 129.63, 128.59, 128.08, 127.44, 127.01, 122.59, 21.76, 15.41, 7.98. HRMS (ESI)  $m/z$  ( $\text{M}+\text{H}$ ) $^+$ : calculated for  $\text{C}_{19}\text{H}_{20}\text{NO}_2\text{S}$ : 326.1215, found: 326.1211.

N-((E)-2-((E)-2-cyclohexylvinyl)benzylidene)-4-methylbenzenesulfonamide (**1g**)

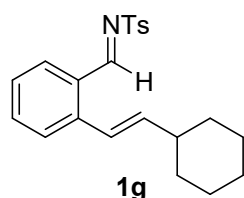

$^1\text{H}$  NMR (400 MHz,  $\text{CDCl}_3$ )  $\delta$  9.36 (s, 1H), 8.07 – 7.97 (m, 1H), 7.89 (d,  $J = 8.3$  Hz, 2H), 7.53 – 7.47 (m, 1H), 7.44 (d,  $J = 7.2$  Hz, 1H), 7.34 (d,  $J = 8.2$  Hz, 2H), 7.27 – 7.26 (m, 1H), 6.81 (d,  $J = 15.7$  Hz, 1H), 5.97 (dd,  $J = 15.7, 7.0$  Hz, 1H), 2.44 (s, 3H), 2.26 – 2.14 (m, 1H), 1.90 – 1.75 (m, 4H), 1.75 – 1.67 (m, 1H), 1.42 – 1.28 (m, 2H), 1.28 – 1.11 (m, 3H).  $^{13}\text{C}$  NMR (101 MHz,  $\text{CDCl}_3$ )  $\delta$  168.75, 144.90, 144.58, 143.16, 135.41, 134.44,

129.87, 129.77, 129.05, 128.16, 127.95, 127.22, 123.03, 41.72, 32.77, 26.14, 21.76. HRMS (ESI)  $m/z$  ( $\text{M}+\text{H}$ ) $^+$ : calculated for  $\text{C}_{22}\text{H}_{26}\text{NO}_2\text{S}$ : 368.1684, found: 368.1682.

N-((E)-2-((E)-3,3-dimethylbut-1-en-1-yl)benzylidene)-4-methylbenzenesulfonamide (**1h**)

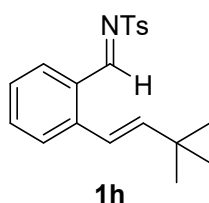

$^1\text{H}$  NMR (400 MHz,  $\text{CDCl}_3$ )  $\delta$  9.30 (s, 1H), 8.02 (dd,  $J = 7.9, 1.2$  Hz, 1H), 7.89 (d,  $J = 8.3$  Hz, 2H), 7.51 (dt,  $J = 7.8, 1.3$  Hz, 1H), 7.47 – 7.41 (m, 1H), 7.35 (d,  $J = 8.0$  Hz, 2H), 7.29 (t,  $J = 7.5$  Hz, 1H), 6.75 (d,  $J = 15.9$  Hz, 1H), 6.01 (d,  $J = 15.9$  Hz, 1H), 2.44 (s, 3H), 1.14 (s, 9H).  $^{13}\text{C}$  NMR (101 MHz,  $\text{CDCl}_3$ )  $\delta$  168.82, 150.10, 144.61, 143.29, 135.30, 134.37, 130.09, 129.90, 129.21, 128.22, 128.18, 127.23, 120.74, 34.32, 29.47, 21.76. HRMS (ESI)

$m/z$  ( $\text{M}+\text{H}$ ) $^+$ : calculated for  $\text{C}_{20}\text{H}_{24}\text{NO}_2\text{S}$ : 342.1528, found: 342.1524.

(E)-4-methyl-N-(2-(prop-1-en-2-yl)benzylidene)benzenesulfonamide (**1i**)

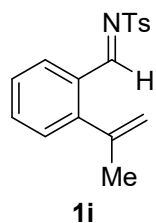

$^1\text{H}$  NMR (400 MHz,  $\text{CDCl}_3$ )  $\delta$  9.27 (s, 1H), 8.12 (d,  $J = 7.9$  Hz, 1H), 7.87 (d,  $J = 7.7$  Hz, 2H), 7.53 (t,  $J = 7.4$  Hz, 1H), 7.34 (d,  $J = 7.5$  Hz, 4H), 5.43 (s, 1H), 4.78 (s, 1H), 2.42 (s, 3H), 2.13 (s, 3H).  $^{13}\text{C}$  NMR (101 MHz,  $\text{CDCl}_3$ )  $\delta$  169.66, 148.94, 144.57, 141.89, 135.39, 134.14, 129.87, 129.53, 128.89, 128.26, 128.07, 127.65, 120.13, 24.93, 21.73. HRMS (ESI)  $m/z$  ( $\text{M}+\text{H}$ ) $^+$ : calculated for  $\text{C}_{17}\text{H}_{18}\text{NO}_2\text{S}$ : 300.1058, found: 300.1052.

(E)-N-(2-(3,3-dimethylbut-1-en-2-yl)benzylidene)-4-methylbenzenesulfonamide (**1j**)

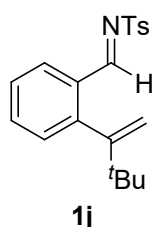

$^1\text{H}$  NMR (500 MHz,  $\text{CDCl}_3$ )  $\delta$  9.11 (s, 1H), 8.18 (dd,  $J = 8.0, 1.2$  Hz, 1H), 7.84 (d,  $J = 8.3$  Hz, 2H), 7.51 (dt,  $J = 7.6, 1.4$  Hz, 1H), 7.36 – 7.33 (m, 3H), 7.21 (dd,  $J = 7.7, 0.7$  Hz, 1H), 5.44 (d,  $J = 1.0$  Hz, 1H), 4.81 (d,  $J = 0.9$  Hz, 1H), 2.44 (s, 3H), 1.06 (s, 9H).  $^{13}\text{C}$  NMR (126 MHz,  $\text{CDCl}_3$ )  $\delta$  170.05, 154.50, 148.04, 144.63, 134.97, 133.44, 130.60, 130.52, 129.92, 128.31, 128.20, 127.45, 115.76, 36.65, 29.60, 21.75. HRMS (ESI)  $m/z$  ( $\text{M}+\text{Na}$ ) $^+$ : calculated for  $\text{C}_{20}\text{H}_{23}\text{NNaO}_2\text{S}$ : 364.1347,

found: 364.1344.

(E)-4-methyl-N-(2-(1-phenylvinyl)benzylidene)benzenesulfonamide (**1k**)

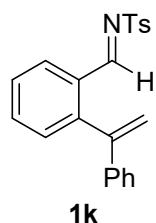

$^1\text{H}$  NMR (500 MHz, DMSO)  $\delta$  8.75 (s, 1H), 7.93 (d,  $J = 7.9$  Hz, 1H), 7.55 (t,  $J = 7.6$  Hz, 1H), 7.39 – 7.35 (m, 3H), 7.26 – 7.15 (m, 6H), 7.03 (d,  $J = 7.4$  Hz, 2H), 5.87

(s, 1H), 5.10 (s, 1H), 2.21 (s, 3H).  $^{13}\text{C}$  NMR (126 MHz, DMSO)  $\delta$  168.77, 146.30, 145.38, 144.53, 140.21, 134.86, 133.93, 130.71, 129.94, 129.77, 128.71, 128.59, 128.26, 128.03, 127.56, 126.55, 118.56, 21.01. **HRMS** (ESI)  $m/z$  ( $M+H$ ) $^+$ : calculated for  $\text{C}_{22}\text{H}_{20}\text{NO}_2\text{S}$ : 362.1215, found: 362.1213.

(E)-N-(2-(1-(3,4-dichlorophenyl)vinyl)benzylidene)-4-methylbenzenesulfonamide (**1l**)

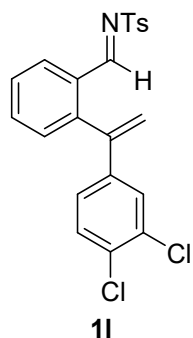

$^1\text{H}$  NMR (500 MHz,  $\text{CDCl}_3$ )  $\delta$  8.97 (s, 1H), 8.17 (d,  $J$  = 7.8 Hz, 1H), 7.63 – 7.60 (m, 3H), 7.47 (t,  $J$  = 7.6 Hz, 1H), 7.36 (d,  $J$  = 8.4 Hz, 1H), 7.33 (d,  $J$  = 7.6 Hz, 1H), 7.29 (d,  $J$  = 8.1 Hz, 2H), 7.23 (d,  $J$  = 2.1 Hz, 1H), 7.05 (dd,  $J$  = 8.4, 2.1 Hz, 1H), 5.96 (s, 1H), 5.31 (s, 1H), 2.43 (s, 3H).  $^{13}\text{C}$  NMR (126 MHz,  $\text{CDCl}_3$ )  $\delta$  168.99, 145.27, 144.75, 144.25, 140.76, 134.71, 134.63, 133.05, 132.52, 130.88, 130.76, 130.69, 129.93, 129.47, 128.93, 128.79, 128.07, 126.28, 119.94, 21.82. **HRMS** (ESI)  $m/z$  ( $M+H$ ) $^+$ : calculated for  $\text{C}_{22}\text{H}_{18}\text{Cl}_2\text{NO}_2\text{S}$ : 430.0435, found: 430.0428.

(E)-4-methyl-N-(2-(1-(naphthalen-1-yl)vinyl)benzylidene)benzenesulfonamide (**1m**)

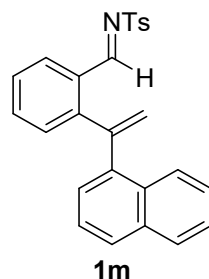

$^1\text{H}$  NMR (500 MHz,  $\text{CDCl}_3$ )  $\delta$  9.40 (s, 1H), 7.93 (s, 1H), 7.92 – 7.86 (m, 3H), 7.79 (d,  $J$  = 8.4 Hz, 1H), 7.52 – 7.46 (m, 2H), 7.43 – 7.40 (m, 1H), 7.39 – 7.32 (m, 4H), 7.23 – 7.14 (m, 2H), 6.94 – 6.93 (m, 1H), 6.16 (d,  $J$  = 2.0 Hz, 1H), 5.20 (d,  $J$  = 9.5 Hz, 1H), 4.89 (d,  $J$  = 9.5 Hz, 1H), 2.44 (s, 3H).  $^{13}\text{C}$  NMR (126 MHz,  $\text{CDCl}_3$ )  $\delta$  169.08, 145.45, 143.88, 143.68, 143.55, 138.06, 133.76, 133.38, 132.37, 131.43, 130.06, 128.71, 128.54, 128.48, 127.38, 126.61, 126.41, 126.17, 126.15, 125.89, 125.48, 124.06, 121.52, 21.71. **HRMS** (ESI)  $m/z$  ( $M+H$ ) $^+$ : calculated for  $\text{C}_{26}\text{H}_{22}\text{NO}_2\text{S}$ : 412.1371, found: 412.1372.

N-((E)-2-((E)-but-2-en-2-yl)benzylidene)-4-methylbenzenesulfonamide (**1n**)

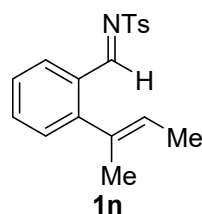

$^1\text{H}$  NMR (400 MHz,  $\text{CDCl}_3$ )  $\delta$  9.05 (s, 1H), 8.14 (t,  $J$  = 11.5 Hz, 1H), 7.87 (d,  $J$  = 7.6 Hz, 2H), 7.57 (t,  $J$  = 7.5 Hz, 1H), 7.35 – 7.32 (m, 3H), 7.21 (d,  $J$  = 7.7 Hz, 1H), 5.78 (q,  $J$  = 6.7 Hz, 1H), 2.44 (s, 3H), 2.02 (s, 3H), 1.30 (d,  $J$  = 6.8 Hz, 3H).  $^{13}\text{C}$  NMR (101 MHz,  $\text{CDCl}_3$ )  $\delta$  169.60, 147.85, 144.59, 135.41, 134.84, 133.49, 129.89, 129.52, 129.23, 128.41, 128.17, 127.48, 125.97, 26.61, 21.77, 14.96. **HRMS** (ESI)  $m/z$  ( $M+H$ ) $^+$ : calculated for  $\text{C}_{18}\text{H}_{20}\text{NO}_2\text{S}$ : 314.1215, found: 314.1210.

(E)-N-(2-(cyclopent-1-en-1-yl)benzylidene)-4-methylbenzenesulfonamide (**1o**)

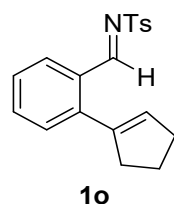

$^1\text{H}$  NMR (500 MHz,  $\text{CDCl}_3$ )  $\delta$  9.20 (s, 1H), 8.09 (dd,  $J$  = 7.9, 1.0 Hz, 1H), 7.87 (d,  $J$  = 8.3 Hz, 2H), 7.53 (dt,  $J$  = 7.7, 1.4 Hz, 1H), 7.35 (d,  $J$  = 8.0 Hz, 3H), 7.31 (t,  $J$  = 7.6 Hz, 1H), 5.60 – 5.51 (m, 1H), 2.72 (tt,  $J$  = 9.8, 2.1 Hz, 2H), 2.62 – 2.55 (m, 2H), 2.44 (s, 3H), 2.11 – 2.01 (m, 2H).  $^{13}\text{C}$  NMR (126 MHz,  $\text{CDCl}_3$ )  $\delta$  169.69, 144.59, 143.63, 140.27, 136.26, 135.17, 134.04, 130.05, 129.90, 129.00, 128.19, 128.04, 127.30, 36.79, 34.27, 23.85, 21.76. **HRMS** (ESI)  $m/z$  ( $M+H$ ) $^+$ : calculated for  $\text{C}_{19}\text{H}_{20}\text{NO}_2\text{S}$ : 326.1215 found: 326.1211.

(E)-4-methyl-N-((2',3',4',5'-tetrahydro-[1,1'-biphenyl]-2-yl)methylene)benzenesulfonamide (**1p**)

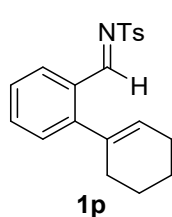

**<sup>1</sup>H NMR** (400 MHz, CDCl<sub>3</sub>) δ 9.07 (s, 1H), 8.09 (d, *J* = 8.2 Hz, 1H), 7.86 (d, *J* = 8.3 Hz, 2H), 7.51 (dt, *J* = 7.6, 1.4 Hz, 1H), 7.35 (d, *J* = 8.0 Hz, 2H), 7.30 (t, *J* = 8.1 Hz, 2H), 5.51 – 5.39 (m, 1H), 2.44 (s, 3H), 2.30 – 2.23 (m, 2H), 2.23 – 2.15 (m, 2H), 1.82 – 1.72 (m, 2H), 1.72 – 1.64 (m, 2H). **<sup>13</sup>C NMR** (101 MHz, CDCl<sub>3</sub>) δ 169.67, 149.90, 144.58, 135.43, 135.01, 134.04, 132.37, 129.90, 129.77, 128.84, 128.45, 128.29, 127.17, 30.75, 25.75, 22.82, 21.80, 21.75. **HRMS** (ESI) *m/z* (M+H)<sup>+</sup>: calculated for C<sub>20</sub>H<sub>22</sub>NO<sub>2</sub>S: 340.1371, found: 340.1367.

4-methyl-N-((E)-2-methyl-6-((E)-prop-1-en-1-yl)benzylidene)benzenesulfonamide (**1q**)

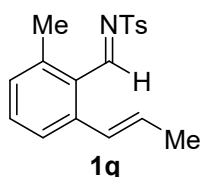

**<sup>1</sup>H NMR** (500 MHz, CDCl<sub>3</sub>) δ 9.40 (s, 1H), 7.89 (d, *J* = 8.2 Hz, 2H), 7.36 – 7.33 (m, 3H), 7.25 (d, *J* = 8.6 Hz, 1H), 7.12 (d, *J* = 7.5 Hz, 1H), 6.78 (d, *J* = 15.5 Hz, 1H), 5.92 (dq, *J* = 13.3, 6.6 Hz, 1H), 2.53 (s, 3H), 2.44 (s, 3H), 1.89 (dd, *J* = 6.6, 1.2 Hz, 3H). **<sup>13</sup>C NMR** (126 MHz, CDCl<sub>3</sub>) δ 170.08, 144.53, 143.35, 141.54, 135.73, 133.12, 132.81, 130.47, 129.88, 128.74, 128.07, 127.71, 126.24, 22.25, 21.77, 19.06. **HRMS** (ESI) *m/z* (M+H)<sup>+</sup>: calculated for C<sub>18</sub>H<sub>20</sub>NO<sub>2</sub>S: 314.1215, found: 314.1215.

4-methyl-N-((E)-4-methyl-2-((E)-prop-1-en-1-yl)benzylidene)benzenesulfonamide (**1r**)

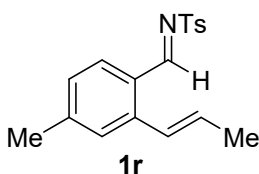

**<sup>1</sup>H NMR** (400 MHz, CDCl<sub>3</sub>) δ 9.35 (s, 1H), 7.96 (d, *J* = 8.1 Hz, 1H), 7.90 – 7.86 (m, 2H), 7.34 (dd, *J* = 8.6, 0.6 Hz, 2H), 7.26 – 7.24 (m, 1H), 7.09 (d, *J* = 8.1 Hz, 1H), 6.88 (dd, *J* = 15.5, 1.7 Hz, 1H), 6.08 (dq, *J* = 15.5, 6.7 Hz, 1H), 2.43 (s, 3H), 2.39 (s, 3H), 1.95 (dd, *J* = 6.7, 1.8 Hz, 3H). **<sup>13</sup>C NMR** (101 MHz, CDCl<sub>3</sub>) δ 168.47, 145.86, 144.43, 143.03, 135.79, 133.27, 129.87, 129.73, 128.43, 128.36, 128.10, 126.75, 126.51, 22.08, 21.78, 19.15. **HRMS** (ESI) *m/z* (M+H)<sup>+</sup>: calculated for C<sub>18</sub>H<sub>20</sub>NO<sub>2</sub>S: 314.1215, found: 314.1211.

4-methyl-N-((E)-3-methyl-2-((E)-prop-1-en-1-yl)benzylidene)benzenesulfonamide (**1s**)

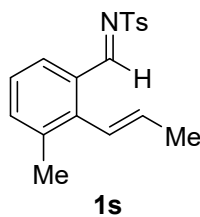

**<sup>1</sup>H NMR** (400 MHz, CDCl<sub>3</sub>) δ 9.22 (s, 1H), 7.97 – 7.92 (m, 1H), 7.90 – 7.83 (m, 2H), 7.38 – 7.31 (m, 3H), 7.22 (dd, *J* = 14.9, 7.2 Hz, 1H), 6.53 (dd, *J* = 15.7, 1.6 Hz, 1H), 5.48 (dq, *J* = 15.7, 6.5 Hz, 1H), 2.44 (s, 3H), 2.30 (s, 3H), 1.98 (dd, *J* = 6.5, 1.8 Hz, 3H). **<sup>13</sup>C NMR** (126 MHz, CDCl<sub>3</sub>) δ 170.72, 144.48, 143.35, 137.22, 137.15, 135.48, 135.41, 130.60, 129.87, 128.14, 127.06, 126.83, 126.14, 21.74, 20.09, 19.17. **HRMS** (ESI) *m/z* (M+H)<sup>+</sup>: calculated for C<sub>18</sub>H<sub>20</sub>NO<sub>2</sub>S: 314.1215, found: 314.1210.

N-((E)-4-fluoro-2-((E)-prop-1-en-1-yl)benzylidene)-4-methylbenzenesulfonamide (**1t**)

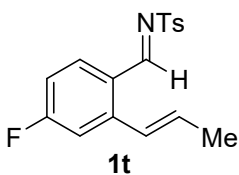

**<sup>1</sup>H NMR** (400 MHz, CDCl<sub>3</sub>) δ 9.32 (s, 1H), 8.07 (dd, *J* = 8.8, 6.1 Hz, 1H), 7.88 (d, *J* = 8.1 Hz, 2H), 7.34 (d, *J* = 8.1 Hz, 2H), 7.12 (dd, *J* = 9.9, 2.4 Hz, 1H), 7.00 – 6.92 (m, 1H), 6.87 (d, *J* = 15.5 Hz, 1H), 6.14 (dq, *J* = 13.4, 6.7 Hz, 1H), 2.42 (s, 3H), 1.96 (d, *J* = 6.7 Hz, 3H). **<sup>13</sup>C NMR** (101 MHz, CDCl<sub>3</sub>) δ 167.02, 166.62 (d, *J* = 257.1 Hz), 145.70 (d, *J* = 9.5 Hz), 144.64, 135.35, 134.65, 132.46 (d, *J* = 10.0 Hz), 129.88, 128.08, 125.61 (d, *J* = 2.0 Hz), 125.24 (d, *J* = 2.5 Hz), 115.07 (d, *J* = 22.4 Hz), 114.11 (d, *J* = 22.3 Hz), 21.73, 19.08. **HRMS** (ESI) *m/z* (M+H)<sup>+</sup>: calculated for C<sub>17</sub>H<sub>17</sub>FNO<sub>2</sub>S: 318.0964, found: 318.0962.

N-((E)-4-methoxy-2-((E)-prop-1-en-1-yl)benzylidene)-4-methylbenzenesulfonamide (**1u**)

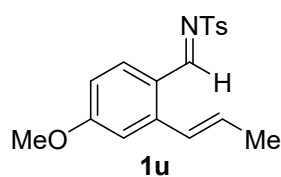

<sup>1</sup>H NMR (400 MHz, CDCl<sub>3</sub>) δ 9.28 (s, 1H), 8.04 (d, *J* = 8.9 Hz, 1H), 7.90 – 7.83 (m, 2H), 7.32 (dd, *J* = 8.5, 0.6 Hz, 2H), 6.93 – 6.86 (m, 2H), 6.80 (dd, *J* = 8.8, 2.5 Hz, 1H), 6.11 (dq, *J* = 15.5, 6.7 Hz, 1H), 3.86 (s, 3H), 2.42 (s, 3H), 1.95 (dd, *J* = 6.7, 1.7 Hz, 3H). <sup>13</sup>C NMR (126 MHz, CDCl<sub>3</sub>) δ 167.55, 164.89, 145.50, 144.21, 136.05, 133.44, 132.12, 129.77, 127.90, 126.62, 122.08, 114.02, 111.96, 55.66, 21.71, 19.05. HRMS (ESI) *m/z* (M+H)<sup>+</sup>: calculated for C<sub>18</sub>H<sub>20</sub>NO<sub>3</sub>S: 330.1164, found: 330.1161.

N-((E)-4-chloro-2-((E)-prop-1-en-1-yl)benzylidene)-4-methylbenzenesulfonamide (**1v**)

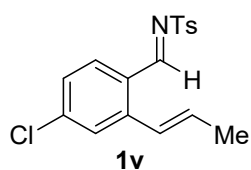

<sup>1</sup>H NMR (500 MHz, CDCl<sub>3</sub>) δ 9.32 (s, 1H), 7.98 (d, *J* = 8.5 Hz, 1H), 7.88 (d, *J* = 8.3 Hz, 2H), 7.43 (d, *J* = 2.0 Hz, 1H), 7.35 (d, *J* = 8.0 Hz, 2H), 7.23 (dd, *J* = 8.5, 2.0 Hz, 1H), 6.84 (dd, *J* = 15.5, 1.6 Hz, 1H), 6.14 (dq, *J* = 15.4, 6.7 Hz, 1H), 2.43 (s, 3H), 1.96 (dd, *J* = 6.7, 1.7 Hz, 3H). <sup>13</sup>C NMR (126 MHz, CDCl<sub>3</sub>) δ 167.26, 144.77, 144.17, 141.08, 135.23, 134.85, 130.88, 129.94, 128.17, 127.69, 127.65, 127.27, 125.48, 21.78, 19.15. HRMS (ESI) *m/z* (M+H)<sup>+</sup>: calculated for C<sub>17</sub>H<sub>17</sub>ClNO<sub>2</sub>S: 334.0669, found: 334.0665.

4-methyl-N-((E)-6-((E)-prop-1-en-1-yl)benzo[d][1,3]dioxol-5-yl)methylene)benzenesulfonamide (**1w**)

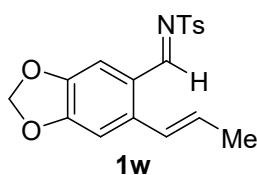

<sup>1</sup>H NMR (400 MHz, CDCl<sub>3</sub>) δ 9.29 (s, 1H), 7.87 (d, *J* = 8.2 Hz, 2H), 7.51 (s, 1H), 7.33 (d, *J* = 8.1 Hz, 2H), 6.81 (d, *J* = 15.4 Hz, 1H), 6.10 – 5.95 (m, 3H), 2.43 (s, 3H), 1.94 (dd, *J* = 6.6, 0.9 Hz, 3H). <sup>13</sup>C NMR (101 MHz, CDCl<sub>3</sub>) δ 166.98, 153.79, 147.57, 144.33, 141.14, 135.95, 132.98, 129.83, 127.97, 126.00, 123.43, 107.19, 106.94, 102.25, 21.77, 19.06. HRMS (ESI) *m/z* (M+H)<sup>+</sup>: calculated for C<sub>18</sub>H<sub>18</sub>NO<sub>4</sub>S: 344.0957, found: 344.0954.

4-methyl-N-((E)-2-((E)-3-phenoxyprop-1-en-1-yl)benzylidene)benzenesulfonamide (**3a**)

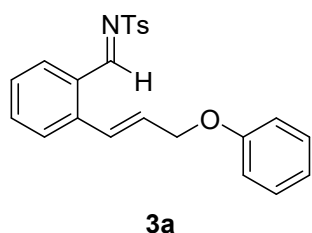

<sup>1</sup>H NMR (500 MHz, CDCl<sub>3</sub>) δ 9.37 (s, 1H), 8.04 (d, *J* = 7.7 Hz, 1H), 7.88 (d, *J* = 8.3 Hz, 2H), 7.59 – 7.49 (m, 2H), 7.41 – 7.28 (m, 6H), 7.03 – 6.95 (m, 3H), 6.27 (dt, *J* = 15.8, 5.4 Hz, 1H), 4.76 (dd, *J* = 5.4, 1.5 Hz, 2H), 2.42 (s, 3H). <sup>13</sup>C NMR (126 MHz, CDCl<sub>3</sub>) δ 168.41, 158.44, 144.71, 141.25, 135.27, 134.62, 131.76, 130.31, 129.93, 129.72, 129.40, 128.25, 128.21, 128.18, 128.11, 121.27, 114.87, 68.13, 21.76. HRMS (ESI) *m/z* (M+H)<sup>+</sup>: calculated for C<sub>23</sub>H<sub>22</sub>NO<sub>3</sub>S: 392.1320, found: 392.1321.

4-methyl-N-((E)-2-((E)-3-(p-tolyloxy)prop-1-en-1-yl)benzylidene)benzenesulfonamide (**3b**)

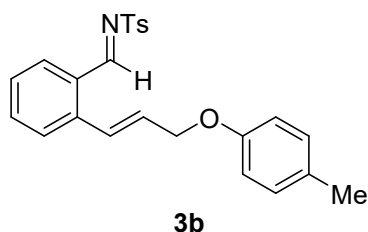

<sup>1</sup>H NMR (500 MHz, CDCl<sub>3</sub>) δ 9.29 (s, 1H), 7.97 (d, *J* = 7.8 Hz, 1H), 7.81 (d, *J* = 8.2 Hz, 2H), 7.46 (q, *J* = 7.9 Hz, 2H), 7.33 – 7.15 (m, 5H), 7.05 (d, *J* = 8.4 Hz, 2H), 6.80 (d, *J* = 8.5 Hz, 2H), 6.18 (dt, *J* = 15.8, 5.4 Hz, 1H), 4.65 (dd, *J* = 5.3, 1.2 Hz, 2H), 2.34 (s, 3H), 2.23 (s, 3H). <sup>13</sup>C NMR (126 MHz, CDCl<sub>3</sub>) δ



168.45, 156.34, 144.71, 141.33, 135.30, 134.62, 132.02, 130.53, 130.28, 130.16, 129.94, 129.83, 129.41, 128.20, 128.12, 126.58, 114.76, 68.33, 21.78, 20.64. **HRMS** (ESI)  $m/z$  ( $M+H$ )<sup>+</sup>: calculated for C<sub>24</sub>H<sub>24</sub>NO<sub>3</sub>S: 406.1477, found: 406.1473.

N-((E)-2-((E)-3-(4-ethylphenoxy)prop-1-en-1-yl)benzylidene)-4-methylbenzenesulfonamide (**3c**)

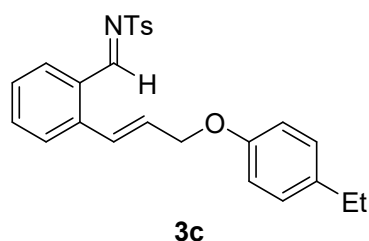

**<sup>1</sup>H NMR** (500 MHz, CDCl<sub>3</sub>) δ 9.37 (s, 1H), 8.04 (d,  $J$  = 7.7 Hz, 1H), 7.88 (d,  $J$  = 8.3 Hz, 2H), 7.59 – 7.50 (m, 2H), 7.39 – 7.27 (m, 4H), 7.15 (d,  $J$  = 8.6 Hz, 2H), 6.97 – 6.84 (m, 2H), 6.26 (dt,  $J$  = 15.8, 5.4 Hz, 1H), 4.73 (dd,  $J$  = 5.4, 1.6 Hz, 2H), 2.61 (q,  $J$  = 7.6 Hz, 2H), 2.42 (s, 3H), 1.23 (t,  $J$  = 7.6 Hz, 3H). **<sup>13</sup>C NMR** (126 MHz, CDCl<sub>3</sub>) δ 168.46, 156.52, 144.71, 141.34, 137.06, 135.30, 134.62, 132.05, 130.29, 129.94, 129.41, 128.98, 128.20,

128.12, 114.77, 68.34, 28.12, 21.77, 15.99. **HRMS** (ESI)  $m/z$  ( $M+H$ )<sup>+</sup>: calculated for C<sub>25</sub>H<sub>26</sub>NO<sub>3</sub>S: 420.1633, found: 420.1633.

N-((E)-2-((E)-3-(4-fluorophenoxy)prop-1-en-1-yl)benzylidene)-4-methylbenzenesulfonamide (**3d**)

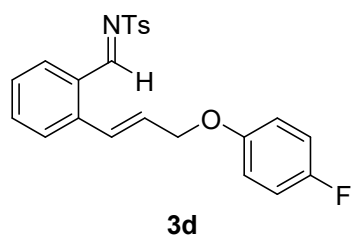

**<sup>1</sup>H NMR** (500 MHz, CDCl<sub>3</sub>) δ 9.36 (s, 1H), 8.04 (d,  $J$  = 7.7 Hz, 1H), 7.88 (d,  $J$  = 8.3 Hz, 2H), 7.57 – 7.52 (m, 2H), 7.38 – 7.29 (m, 4H), 7.06 – 6.97 (m, 2H), 6.95 – 6.88 (m, 2H), 6.25 (dt,  $J$  = 15.8, 5.4 Hz, 1H), 4.72 (dd,  $J$  = 5.4, 1.5 Hz, 2H), 2.42 (s, 3H). **<sup>13</sup>C NMR** (126 MHz, CDCl<sub>3</sub>) δ 168.42, 157.59 (d,  $J$  = 238.9 Hz), 154.56, 144.75, 141.16, 135.31, 134.65, 131.49, 130.43, 129.95, 129.44, 128.48, 128.29, 128.18, 128.11, 116.07 (d,  $J$  = 31.2 Hz), 116.01,

68.89, 21.78. **HRMS** (ESI)  $m/z$  ( $M+H$ )<sup>+</sup>: calculated for C<sub>23</sub>H<sub>21</sub>FNO<sub>3</sub>S: 410.1226, found: 410.1228.

N-((E)-2-((E)-3-(4-methoxyphenoxy)prop-1-en-1-yl)benzylidene)-4-methylbenzenesulfonamide (**3e**)

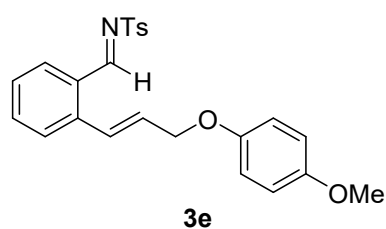

**<sup>1</sup>H NMR** (500 MHz, CDCl<sub>3</sub>) δ 9.36 (s, 1H), 8.06 – 8.02 (m, 1H), 7.91 – 7.85 (m, 2H), 7.57 – 7.50 (m, 2H), 7.38 – 7.31 (m, 3H), 7.28 (d,  $J$  = 15.8 Hz, 1H), 6.97 – 6.83 (m, 4H), 6.25 (dt,  $J$  = 15.8, 5.4 Hz, 1H), 4.70 (dd,  $J$  = 5.4, 1.7 Hz, 2H), 3.79 (s, 3H), 2.42 (s, 3H). **<sup>13</sup>C NMR** (126 MHz, CDCl<sub>3</sub>) δ 168.32, 154.17, 152.51, 144.59, 141.24, 135.26, 134.50, 131.99,

130.18, 129.83, 129.35, 128.09, 128.02, 115.87, 114.79, 68.88, 55.75, 21.66. **HRMS** (ESI)  $m/z$  ( $M+H$ )<sup>+</sup>: calculated for C<sub>24</sub>H<sub>24</sub>NO<sub>4</sub>S: 422.1426, found: 422.1421.

4-methyl-N-((E)-2-((E)-3-(4-(trifluoromethyl)phenoxy)prop-1-en-1-yl)benzylidene)benzenesulfonamide (**3f**)

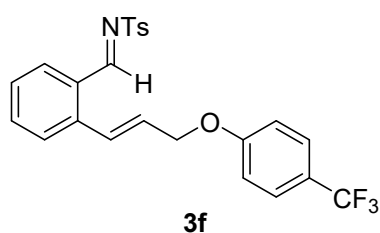

**<sup>1</sup>H NMR** (500 MHz, CDCl<sub>3</sub>) δ 9.37 (s, 1H), 8.04 (d,  $J$  = 7.8 Hz, 1H), 7.88 (d,  $J$  = 8.1 Hz, 2H), 7.63 – 7.50 (m, 4H), 7.41 – 7.28 (m, 4H), 7.04 (d,  $J$  = 8.5 Hz, 2H), 6.26 (dt,  $J$  = 15.8, 5.4 Hz, 1H), 4.80 (d,  $J$  = 4.7 Hz, 2H), 2.42 (s, 3H). **<sup>13</sup>C NMR** (126 MHz, CDCl<sub>3</sub>) δ 168.44, 160.87, 144.81, 140.92, 135.30,

134.67, 130.66, 129.96, 129.47, 129.09, 128.43, 128.17, 128.14, 127.18 (q,  $J = 3.5$  Hz), 126.68 (q,  $J = 271.2$  Hz), 123.40 (q,  $J = 32.3$  Hz), 114.89, 68.37, 21.77. **HRMS** (ESI)  $m/z$  ( $M+H$ )<sup>+</sup>: calculated for C<sub>24</sub>H<sub>21</sub>F<sub>3</sub>NO<sub>3</sub>S: 460.1194, found: 460.1194.

## 5. General procedure for the synthesis of 2 and 4.

Synthesis of 2a is described as a typical procedure.

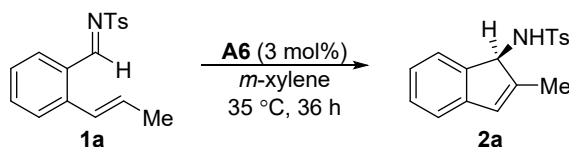

To a flame-dried and Ar-purged Schlenk tube (10 mL) were added **1a** (0.1 mmol, 29.9 mg), **A6** (0.003 mmol, 2.6 mg), *m*-xylene (1 mL) and a stirring bar. The Schlenk tube was then evacuated and filled with argon. The mixture was stirred at 35 °C for 36 h. The solution was concentrated and the residue was purified by flash column chromatography (petroleum ether/EtOAc = 4 : 1) on silica gel to afford the **2a**.

## 6. Characterizations for the products 2 and 4.

(S)-4-methyl-N-(2-methyl-1H-inden-1-yl)benzenesulfonamide (**2a**)

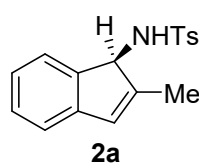

**Yield:** 91%, 27.2 mg. **<sup>1</sup>H NMR** (500 MHz, CDCl<sub>3</sub>)  $\delta$  7.86 (d,  $J = 8.2$  Hz, 2H), 7.36 (d,  $J = 8.1$  Hz, 2H), 7.15 (t,  $J = 7.4$  Hz, 1H), 7.06 (d,  $J = 7.4$  Hz, 1H), 6.95 (t,  $J = 7.4$  Hz, 1H), 6.75 (d,  $J = 7.4$  Hz, 1H), 6.31 (s, 1H), 4.68 (d,  $J = 9.6$  Hz, 1H), 4.60 (d,  $J = 9.6$  Hz, 1H), 2.48 (s, 3H), 1.89 (s, 3H). **<sup>13</sup>C NMR** (126 MHz, CDCl<sub>3</sub>)  $\delta$  146.10, 143.72, 143.50, 143.28, 138.58, 129.94, 128.48, 127.87, 127.33, 124.99, 123.44, 120.35, 62.49, 21.71, 13.97. **HRMS** (ESI)  $m/z$  ( $M+H$ )<sup>+</sup>: calculated for C<sub>17</sub>H<sub>18</sub>NO<sub>2</sub>S: 300.1058, found: 300.1046.  $[\alpha]^{20}_D = -63.9$  ( $c = 0.72$ , acetone). **The product was analyzed by HPLC to determine the enantiomeric excess:** 92% ee; (CHIRALPAK IE, hexane/*i*-PrOH = 70/30, flow rate: 1.0 mL/min,  $T = 30$  °C, 254 nm),  $t_R$  (major) = 7.97 min,  $t_R$  (minor) = 11.40 min. The absolute configuration was assigned tentatively by analogy.

(S)-N-(1H-inden-1-yl)-4-methylbenzenesulfonamide (**2b**)

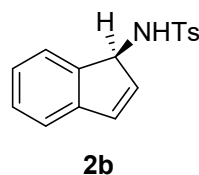

**Yield:** 69%, 19.7 mg. **<sup>1</sup>H NMR** (500 MHz, CDCl<sub>3</sub>)  $\delta$  7.85 (d,  $J = 8.3$  Hz, 2H), 7.35 (d,  $J = 8.0$  Hz, 2H), 7.26 – 7.18 (m, 3H), 7.12 (dt,  $J = 7.4, 1.3$  Hz, 1H), 6.67 (dd,  $J = 5.6, 1.3$  Hz, 1H), 6.04 (dd,  $J = 5.6, 1.9$  Hz, 1H), 4.90 (d,  $J = 9.6$  Hz, 1H), 4.68 (d,  $J = 9.6$  Hz, 1H), 2.47 (s, 3H). **<sup>13</sup>C NMR** (126 MHz, CDCl<sub>3</sub>)  $\delta$  143.76, 143.13, 142.41, 137.92, 135.10, 133.28, 129.93, 128.53, 127.30, 126.18, 123.77, 121.57, 60.41, 21.65. **HRMS** (ESI)  $m/z$  ( $M+H$ )<sup>+</sup>: calculated for C<sub>16</sub>H<sub>16</sub>NO<sub>2</sub>S: 286.0902, found: 286.0894.  $[\alpha]^{20}_D = -64.7$  ( $c = 0.51$ , acetone). **The product was analyzed by HPLC to determine the enantiomeric excess:** 82% ee; (CHIRALPAK IE, hexane/*i*-PrOH = 70/30, flow rate: 1.0 mL/min,  $T = 30$  °C, 254 nm),  $t_R$  (major) = 11.33 min,  $t_R$  (minor) = 12.74 min. The absolute configuration was assigned tentatively by analogy.

(R)-4-methyl-N-(2-phenyl-1H-inden-1-yl)benzenesulfonamide (**2c**)

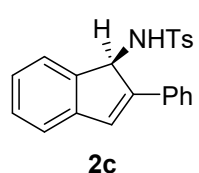

**Yield:** 68%, 24.6 mg. **<sup>1</sup>H NMR** (500 MHz, CDCl<sub>3</sub>)  $\delta$  7.83 (d,  $J = 8.3$  Hz, 2H), 7.35 (d,  $J = 8.0$  Hz, 2H), 7.31 – 7.27 (m, 2H), 7.27 – 7.22 (m, 4H), 7.21 – 7.17

(m, 2H), 7.13 – 7.07 (m, 1H), 7.00 (d,  $J = 1.0$  Hz, 1H), 5.44 (dd,  $J = 9.1, 0.7$  Hz, 1H), 4.47 (d,  $J = 9.1$  Hz, 1H), 2.50 (s, 3H).  $^{13}\text{C}$  NMR (126 MHz,  $\text{CDCl}_3$ )  $\delta$  146.35, 144.28, 143.85, 142.27, 138.52, 133.36, 129.96, 128.90, 128.79, 128.69, 128.01, 127.66, 127.01, 126.42, 124.82, 121.48, 59.67, 21.76. **HRMS** (ESI)  $m/z$  ( $\text{M}+\text{H}$ ) $^+$ : calculated for  $\text{C}_{22}\text{H}_{20}\text{NO}_2\text{S}$ : 362.1215, found: 362.1205.  $[\alpha]^{20}_{\text{D}} = -74.0$  ( $c = 0.45$ , acetone). **The product was analyzed by HPLC to determine the enantiomeric excess:** 83% ee; (CHIRALPAK AD-H, hexane/*i*-PrOH = 80/20, flow rate: 1.0 mL/min,  $T = 30$  °C, 254 nm),  $t_{\text{R}}$  (major) = 17.11 min,  $t_{\text{R}}$  (minor) = 18.73 min. The absolute configuration was assigned tentatively by analogy.

(S)-N-(2-benzyl-1H-inden-1-yl)-4-methylbenzenesulfonamide (**2d**)

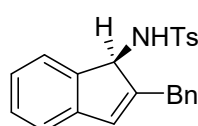

**2d**

**Yield:** 67%, 25.2 mg.  $^1\text{H}$  NMR (500 MHz,  $\text{CDCl}_3$ )  $\delta$  7.85 (d,  $J = 8.3$  Hz, 2H), 7.35 (d,  $J = 8.0$  Hz, 2H), 7.31 – 7.26 (m, 2H), 7.25 – 7.20 (m, 1H), 7.18 – 7.11 (m, 3H), 7.06 (d,  $J = 7.4$  Hz, 1H), 6.96 (dt,  $J = 7.5, 1.0$  Hz, 1H), 6.79 (d,  $J = 7.4$  Hz, 1H), 6.20 (d,  $J = 0.9$  Hz, 1H), 4.81 (d,  $J = 9.7$  Hz, 1H), 4.58 (d,  $J = 9.7$  Hz, 1H), 3.68 (d,  $J = 16.6$  Hz, 1H), 3.51 (d,  $J = 16.5$  Hz, 1H), 2.48 (s, 3H).  $^{13}\text{C}$  NMR (126 MHz,  $\text{CDCl}_3$ )  $\delta$  149.55, 143.83, 143.60, 142.89, 138.93, 138.50, 130.02, 129.18, 128.85, 128.59, 127.39, 126.42, 125.41, 123.70, 120.83, 61.58, 34.61, 21.75. **HRMS** (ESI)  $m/z$  ( $\text{M}+\text{H}$ ) $^+$ : calculated for  $\text{C}_{23}\text{H}_{22}\text{NO}_2\text{S}$ : 376.1371, found: 376.1366.  $[\alpha]^{20}_{\text{D}} = -79.7$  ( $c = 0.48$ , acetone). **The product was analyzed by HPLC to determine the enantiomeric excess:** 93% ee; (CHIRALPAK IE, hexane/*i*-PrOH = 70/30, flow rate: 1.0 mL/min,  $T = 30$  °C, 254 nm),  $t_{\text{R}}$  (major) = 8.50 min,  $t_{\text{R}}$  (minor) = 10.56 min. The absolute configuration was assigned tentatively by analogy.

(S)-4-methyl-N-(2-propyl-1H-inden-1-yl)benzenesulfonamide (**2e**)

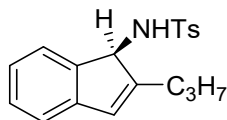

**2e**

**Yield:** 85%, 27.8 mg.  $^1\text{H}$  NMR (500 MHz,  $\text{CDCl}_3$ )  $\delta$  7.88 (d,  $J = 8.3$  Hz, 2H), 7.36 (d,  $J = 8.1$  Hz, 2H), 7.17 (t,  $J = 7.4$  Hz, 1H), 7.09 (d,  $J = 7.3$  Hz, 1H), 6.96 (dt,  $J = 7.5, 0.8$  Hz, 1H), 6.79 (d,  $J = 7.4$  Hz, 1H), 6.33 (s, 1H), 4.75 (d,  $J = 9.7$  Hz, 1H), 4.50 (d,  $J = 9.7$  Hz, 1H), 2.48 (s, 3H), 2.28 – 2.07 (m, 2H), 1.54 – 1.34 (m, 2H), 0.87 (t,  $J = 7.3$  Hz, 3H).  $^{13}\text{C}$  NMR (126 MHz,  $\text{CDCl}_3$ )  $\delta$  150.57, 143.79, 143.55, 143.23, 138.64, 129.98, 128.54, 127.41, 126.96, 125.11, 123.62, 120.51, 61.42, 30.14, 21.72, 21.62, 14.06. **HRMS** (ESI)  $m/z$  ( $\text{M}+\text{H}$ ) $^+$ : calculated for  $\text{C}_{19}\text{H}_{22}\text{NO}_2\text{S}$ : 328.1371, found: 328.1365.  $[\alpha]^{20}_{\text{D}} = -78.3$  ( $c = 0.44$ , acetone). **The product was analyzed by HPLC to determine the enantiomeric excess:** 91% ee; (CHIRALPAK IE, hexane/*i*-PrOH = 70/30, flow rate: 1.0 mL/min,  $T = 30$  °C, 254 nm),  $t_{\text{R}}$  (major) = 6.74 min,  $t_{\text{R}}$  (minor) = 7.54 min. The absolute configuration was assigned tentatively by analogy.

(S)-N-(2-cyclopropyl-1H-inden-1-yl)-4-methylbenzenesulfonamide (**2f**)

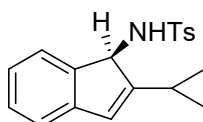

**2f**

**Yield:** 67%, 21.8 mg.  $^1\text{H}$  NMR (500 MHz,  $\text{CDCl}_3$ )  $\delta$  7.90 (d,  $J = 8.2$  Hz, 2H), 7.36 (d,  $J = 8.0$  Hz, 2H), 7.16 (t,  $J = 7.4$  Hz, 1H), 7.06 (d,  $J = 7.4$  Hz, 1H), 6.96 (dt,  $J = 7.5, 0.9$  Hz, 1H), 6.82 (d,  $J = 7.4$  Hz, 1H), 6.08 (s, 1H), 4.86 (d,  $J = 9.5$  Hz, 1H), 4.59 (d,  $J = 9.5$  Hz, 1H), 2.47 (s, 3H), 1.46 – 1.36 (m, 1H), 0.92 – 0.78 (m, 1H), 0.76 – 0.66 (m, 1H), 0.62 – 0.47 (m, 2H).  $^{13}\text{C}$  NMR (126 MHz,  $\text{CDCl}_3$ )  $\delta$  152.99, 143.64, 143.41, 142.90, 138.52, 129.84, 128.47, 127.33, 124.92, 123.44, 122.84, 120.40, 62.19, 21.63, 9.28, 8.84, 8.32. **HRMS** (ESI)  $m/z$  ( $\text{M}+\text{Na}$ ) $^+$ : calculated for  $\text{C}_{19}\text{H}_{19}\text{NNaO}_2\text{S}$ : 348.1034, found: 348.1027.  $[\alpha]^{20}_{\text{D}} = -63.2$  ( $c = 0.28$ , acetone). **The product was analyzed by**

**HPLC to determine the enantiomeric excess:** 84% ee; (CHIRALPAK IE, hexane/i-PrOH = 70/30, flow rate: 1.0 mL/min, T = 30 °C, 254 nm),  $t_R$  (major) = 7.93 min,  $t_R$  (minor) = 8.91 min. The absolute configuration was assigned tentatively by analogy.

(S)-N-(2-cyclohexyl-1H-inden-1-yl)-4-methylbenzenesulfonamide (**2g**)

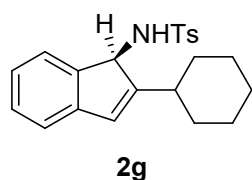

**Yield:** 88%, 32.3 mg.  $^1\text{H NMR}$  (500 MHz,  $\text{CDCl}_3$ )  $\delta$  7.88 (d,  $J$  = 8.3 Hz, 2H), 7.36 (d,  $J$  = 8.0 Hz, 2H), 7.17 (dt,  $J$  = 7.1, 1.4 Hz, 1H), 7.10 (d,  $J$  = 7.4 Hz, 1H), 7.02 – 6.93 (m, 2H), 6.30 (s, 1H), 4.84 (d,  $J$  = 9.8 Hz, 1H), 4.49 (d,  $J$  = 9.8 Hz, 1H), 2.47 (s, 3H), 2.11 (t,  $J$  = 11.3 Hz, 1H), 1.79 (t,  $J$  = 14.4 Hz, 2H), 1.65 (d,  $J$  = 12.3 Hz, 1H), 1.57 (dd,  $J$  = 12.1, 6.3 Hz, 2H), 1.40 – 1.30 (m, 1H), 1.24 (ddt,  $J$  = 12.8, 9.6, 3.2 Hz, 1H), 1.18 – 1.00 (m, 2H), 0.96 – 0.83 (m, 1H).  $^{13}\text{C NMR}$  (126 MHz,  $\text{CDCl}_3$ )  $\delta$  155.55, 143.67, 143.60, 143.01, 138.46, 129.88, 128.41, 127.35, 125.11, 123.83, 120.53, 60.04, 36.23, 34.23, 31.39, 26.50, 26.32, 26.22, 21.61. **HRMS** (ESI)  $m/z$  ( $\text{M}+\text{H}^+$ ): calculated for  $\text{C}_{22}\text{H}_{26}\text{NO}_2\text{S}$ : 368.1684, found: 368.1675.  $[\alpha]^{20}_{\text{D}}$  = -129.4 ( $c$  = 0.63, acetone). **The product was analyzed by HPLC to determine the enantiomeric excess:** 91% ee; (CHIRALPAK IE, hexane/i-PrOH = 70/30, flow rate: 1.0 mL/min, T = 30 °C, 254 nm),  $t_R$  (major) = 6.64 min,  $t_R$  (minor) = 7.18 min. The absolute configuration was assigned tentatively by analogy.

(S)-N-(2-(tert-butyl)-1H-inden-1-yl)-4-methylbenzenesulfonamide (**2h**)

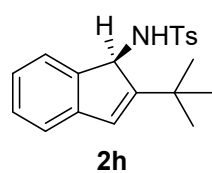

**Yield:** 44%, 15.0 mg.  $^1\text{H NMR}$  (500 MHz,  $\text{CDCl}_3$ )  $\delta$  7.88 (d,  $J$  = 8.3 Hz, 2H), 7.37 (d,  $J$  = 8.0 Hz, 2H), 7.15 (t,  $J$  = 7.3 Hz, 1H), 7.09 (d,  $J$  = 7.2 Hz, 1H), 6.91 (dt,  $J$  = 7.5, 1.1 Hz, 1H), 6.65 (d,  $J$  = 7.5 Hz, 1H), 6.43 (d,  $J$  = 0.9 Hz, 1H), 5.12 (d,  $J$  = 10.3 Hz, 1H), 4.35 (d,  $J$  = 10.3 Hz, 1H), 2.49 (s, 3H), 1.22 (s, 9H).  $^{13}\text{C NMR}$  (126 MHz,  $\text{CDCl}_3$ )  $\delta$  157.50, 144.43, 143.86, 142.32, 138.99, 130.04, 128.43, 127.43, 126.67, 125.44, 123.69, 120.64, 60.68, 33.86, 30.26, 21.76. **HRMS** (ESI)  $m/z$  ( $\text{M}+\text{Na}^+$ ): calculated for  $\text{C}_{20}\text{H}_{23}\text{NNaO}_2\text{S}$ : 364.1347, found: 364.1342.  $[\alpha]^{20}_{\text{D}}$  = -42.1 ( $c$  = 0.34, acetone). **The product was analyzed by HPLC to determine the enantiomeric excess:** 82% ee; (CHIRALPAK AD-H, hexane/i-PrOH = 80/20, flow rate: 1.0 mL/min, T = 30 °C, 254 nm),  $t_R$  (major) = 5.86 min,  $t_R$  (minor) = 7.36 min. The absolute configuration was assigned tentatively by analogy.

(S)-4-methyl-N-(3-methyl-1H-inden-1-yl)benzenesulfonamid (**2i**)

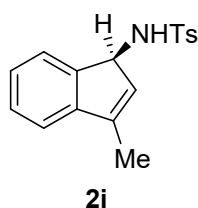

**Yield:** 94%, 28.1 mg.  $^1\text{H NMR}$  (500 MHz,  $\text{CDCl}_3$ )  $\delta$  7.86 (d,  $J$  = 8.3 Hz, 2H), 7.36 (d,  $J$  = 8.1 Hz, 2H), 7.29 (t,  $J$  = 7.4 Hz, 1H), 7.23 (d,  $J$  = 7.0 Hz, 1H), 7.16 (dd,  $J$  = 13.3, 7.1 Hz, 2H), 5.76 – 5.67 (m, 1H), 4.87 (d,  $J$  = 9.7 Hz, 1H), 4.47 (d,  $J$  = 9.7 Hz, 1H), 2.48 (s, 3H), 2.02 (t,  $J$  = 1.7 Hz, 3H).  $^{13}\text{C NMR}$  (126 MHz,  $\text{CDCl}_3$ )  $\delta$  144.06, 143.88, 143.78, 142.08, 138.16, 130.00, 129.64, 128.52, 127.41, 126.27, 123.67, 119.41, 59.47, 21.75, 12.96. **HRMS** (ESI)  $m/z$  ( $\text{M}+\text{Na}^+$ ): calculated for  $\text{C}_{17}\text{H}_{17}\text{NNaO}_2\text{S}$ : 322.0878, found: 322.0870.  $[\alpha]^{20}_{\text{D}}$  = -69.1 ( $c$  = 0.32, acetone). **The product was analyzed by HPLC to determine the enantiomeric excess:** 87% ee; (CHIRALPAK IE, hexane/i-PrOH = 70/30, flow rate: 1.0 mL/min, T = 30 °C, 254 nm),  $t_R$  (major) = 21.43 min,  $t_R$  (minor) = 20.62 min. The absolute configuration was assigned tentatively by analogy.

(S)-N-(3-(tert-butyl)-1H-inden-1-yl)-4-methylbenzenesulfonamide (**2j**)

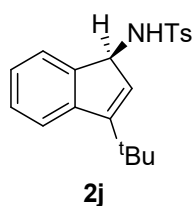

**Yield:** 99%, 33.8 mg.  $^1\text{H NMR}$  (500 MHz,  $\text{CDCl}_3$ )  $\delta$  7.87 (d,  $J = 8.3$  Hz, 2H), 7.46 (d,  $J = 7.7$  Hz, 1H), 7.36 (d,  $J = 8.0$  Hz, 2H), 7.28 – 7.20 (m, 2H), 7.13 (dt,  $J = 7.4, 3.7$  Hz, 1H), 5.73 (d,  $J = 2.1$  Hz, 1H), 4.80 (dd,  $J = 9.5, 1.9$  Hz, 1H), 4.53 (d,  $J = 9.5$  Hz, 1H), 2.47 (s, 3H), 1.26 (s, 9H).  $^{13}\text{C NMR}$  (126 MHz,  $\text{CDCl}_3$ )  $\delta$  155.02, 145.16, 143.75, 142.09, 138.14, 129.94, 128.05, 127.44, 127.18, 125.66, 124.00, 122.67, 58.80, 33.17, 29.09, 21.71. **HRMS** (ESI)  $m/z$  ( $\text{M}+\text{Na}$ ) $^+$ : calculated for  $\text{C}_{20}\text{H}_{23}\text{NNaO}_2\text{S}$ : 364.1347, found: 364.1341.  $[\alpha]^{20}_{\text{D}} = +46.0$  ( $c = 0.57$ , acetone). **The product was analyzed by HPLC to determine the enantiomeric excess:** 76% ee; (CHIRALPAK IE, hexane/*i*-PrOH = 70/30, flow rate: 1.0 mL/min,  $T = 30$  °C, 254 nm),  $t_{\text{R}}$  (major) = 7.97 min,  $t_{\text{R}}$  (minor) = 11.40 min. The absolute configuration was assigned tentatively by analogy.

(S)-4-methyl-N-(3-phenyl-1H-inden-1-yl)benzenesulfonamide (**2k**)

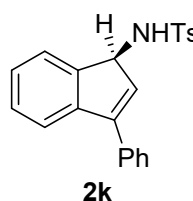

**Yield:** 93%, 33.6 mg.  $^1\text{H NMR}$  (500 MHz,  $\text{CDCl}_3$ )  $\delta$  7.89 (d,  $J = 8.3$  Hz, 2H), 7.48 – 7.46 (m, 2H), 7.45 – 7.38 (m, 4H), 7.38 – 7.36 (m, 2H), 7.33 – 7.28 (m, 2H), 7.21 (dt,  $J = 7.4, 0.8$  Hz, 1H), 6.08 (d,  $J = 2.2$  Hz, 1H), 5.03 (dd,  $J = 9.6, 1.9$  Hz, 1H), 4.66 (d,  $J = 9.6$  Hz, 1H), 2.47 (s, 3H).  $^{13}\text{C NMR}$  (126 MHz,  $\text{CDCl}_3$ )  $\delta$  146.26, 144.33, 143.89, 142.00, 138.06, 134.54, 131.08, 130.05, 128.79, 128.53, 128.50, 127.64, 127.42, 126.59, 124.30, 121.00, 59.56, 21.74. **HRMS** (ESI)  $m/z$  ( $\text{M}+\text{Na}$ ) $^+$ : calculated for  $\text{C}_{22}\text{H}_{19}\text{NNaO}_2\text{S}$ : 384.1034, found: 384.1034.  $[\alpha]^{20}_{\text{D}} = +56.4$  ( $c = 0.37$ , acetone). **The product was analyzed by HPLC to determine the enantiomeric excess:** 81% ee; (CHIRALPAK IE, hexane/*i*-PrOH = 70/30, flow rate: 1.0 mL/min,  $T = 30$  °C, 254 nm),  $t_{\text{R}}$  (major) = 14.91 min,  $t_{\text{R}}$  (minor) = 12.86 min. The absolute configuration was assigned tentatively by analogy.

(S)-N-(3-(3,4-dichlorophenyl)-1H-inden-1-yl)-4-methylbenzenesulfonamide (**2l**)

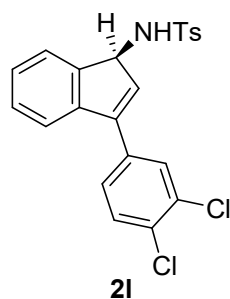

**Yield:** 99%, 42.6 mg.  $^1\text{H NMR}$  (500 MHz,  $\text{CDCl}_3$ )  $\delta$  7.87 (d,  $J = 8.3$  Hz, 2H), 7.54 (d,  $J = 2.0$  Hz, 1H), 7.49 (d,  $J = 8.3$  Hz, 1H), 7.37 (d,  $J = 8.0$  Hz, 2H), 7.35 – 7.28 (m, 4H), 7.22 (dt,  $J = 7.0, 1.4$  Hz, 1H), 6.13 (d,  $J = 2.2$  Hz, 1H), 5.00 (dd,  $J = 9.5, 2.0$  Hz, 1H), 4.69 (d,  $J = 9.5$  Hz, 1H), 2.48 (s, 3H).  $^{13}\text{C NMR}$  (126 MHz,  $\text{CDCl}_3$ )  $\delta$  144.08, 144.07, 144.05, 141.15, 137.90, 134.51, 133.01, 132.56, 132.50, 130.83, 130.10, 129.47, 128.72, 127.43, 126.99, 126.92, 124.47, 120.65, 59.51, 21.76. **HRMS** (ESI)  $m/z$  ( $\text{M}+\text{Na}$ ) $^+$ : calculated for  $\text{C}_{22}\text{H}_{17}\text{Cl}_2\text{NNaO}_2\text{S}$ : 452.0255, found: 452.0256.  $[\alpha]^{20}_{\text{D}} = +95.0$  ( $c = 0.36$ , acetone). **The product was analyzed by HPLC to determine the enantiomeric excess:** 87% ee; (CHIRALPAK AD-H, hexane/*i*-PrOH = 70/30, flow rate: 1.0 mL/min,  $T = 30$  °C, 254 nm),  $t_{\text{R}}$  (major) = 7.97 min,  $t_{\text{R}}$  (minor) = 11.40 min. The absolute configuration was assigned tentatively by analogy.

(S)-4-methyl-N-(3-(naphthalen-1-yl)-1H-inden-1-yl)benzenesulfonamide (**2m**)

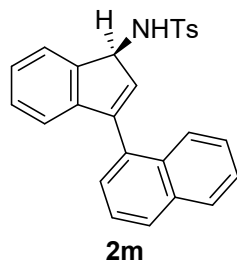

**Yield:** 91%, 37.4 mg.  $^1\text{H NMR}$  (500 MHz,  $\text{CDCl}_3$ )  $\delta$  7.95 – 7.86 (m, 4H), 7.78 (d,  $J = 8.5$  Hz, 1H), 7.52 – 7.49 (t,  $J = 7.6$  Hz, 2H), 7.43 – 7.33 (m, 5H), 7.23 – 7.16 (m, 2H), 6.93 (dd,  $J = 5.8, 2.5$  Hz, 1H), 6.16 (d,  $J = 2.0$  Hz, 1H), 5.21 (d,  $J = 9.5$  Hz, 1H), 4.81 (d,  $J = 9.5$  Hz, 1H), 2.44 (s, 3H).  $^{13}\text{C NMR}$

(126 MHz, CDCl<sub>3</sub>)  $\delta$  145.51, 143.92, 143.71, 143.56, 138.09, 133.79, 133.40, 132.39, 131.46, 130.09, 128.73, 128.58, 128.51, 127.41, 126.64, 126.43, 126.19, 126.16, 125.89, 125.50, 124.07, 121.56, 60.00, 21.73. **HRMS** (ESI)  $m/z$  (M+Na)<sup>+</sup>: calculated for C<sub>26</sub>H<sub>21</sub>NNaO<sub>2</sub>S: 434.1191, found: 434.1182.  $[\alpha]^{20}_D = -3.2$  (c = 0.31, acetone). **The product was analyzed by HPLC to determine the enantiomeric excess:** 80% ee; (CHIRALPAK AD-H, hexane/i-PrOH = 95/5, flow rate: 1.0 mL/min, T = 30 °C, 254 nm),  $t_R$  (major) = 29.22 min,  $t_R$  (minor) = 25.27 min. The absolute configuration was assigned tentatively by analogy.

(S)-N-(2,3-dimethyl-1H-inden-1-yl)-4-methylbenzenesulfonamide (**2n**)

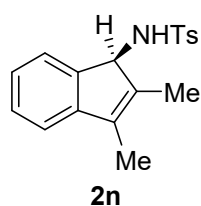

**Yield:** 98%, 30.7 mg. **<sup>1</sup>H NMR** (500 MHz, CDCl<sub>3</sub>)  $\delta$  7.88 (d,  $J$  = 8.3 Hz, 2H), 7.37 (d,  $J$  = 8.3 Hz, 2H), 7.22 (t,  $J$  = 7.5 Hz, 1H), 7.07 (d,  $J$  = 7.4 Hz, 1H), 6.98 (t,  $J$  = 7.4 Hz, 1H), 6.77 (d,  $J$  = 7.3 Hz, 1H), 4.68 (d,  $J$  = 9.6 Hz, 1H), 4.42 (d,  $J$  = 9.7 Hz, 1H), 2.48 (s, 3H), 1.94 (s, 3H), 1.81 (s, 3H). **<sup>13</sup>C NMR** (126 MHz, CDCl<sub>3</sub>)  $\delta$  145.31, 143.71, 142.87, 138.76, 138.05, 134.17, 129.98, 128.45, 127.41, 125.18, 123.09, 118.42, 62.49, 21.75, 11.25, 10.46. **HRMS** (ESI)  $m/z$  (M+Na)<sup>+</sup>: calculated for C<sub>18</sub>H<sub>19</sub>NNaO<sub>2</sub>S: 336.1034, found: 336.1031.  $[\alpha]^{20}_D = -59.2$  (c = 0.53, acetone). **The product was analyzed by HPLC to determine the enantiomeric excess:** 77% ee; (CHIRALPAK IE, hexane/i-PrOH = 70/30, flow rate: 1.0 mL/min, T = 30 °C, 254 nm),  $t_R$  (major) = 8.30 min,  $t_R$  (minor) = 8.58 min. The absolute configuration was assigned tentatively by analogy.

(S)-4-methyl-N-(1,2,3,8-tetrahydrocyclopenta[a]inden-8-yl)benzenesulfonamide (**2o**)

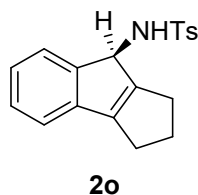

**Yield:** 85%, 27.7 mg. **<sup>1</sup>H NMR** (500 MHz, CDCl<sub>3</sub>)  $\delta$  7.85 (d,  $J$  = 8.2 Hz, 2H), 7.34 (d,  $J$  = 8.2 Hz, 2H), 7.19 (t,  $J$  = 7.5 Hz, 1H), 7.13 (d,  $J$  = 7.3 Hz, 1H), 7.03 (dd,  $J$  = 16.9, 7.4 Hz, 2H), 4.71 (d,  $J$  = 9.4 Hz, 1H), 4.57 (d,  $J$  = 9.5 Hz, 1H), 2.51 – 2.43 (m, 2H), 2.46 (s, 3H), 2.31 – 2.23 (m, 2H), 2.22 – 2.16 (m, 1H), 2.14 – 2.05 (m, 1H). **<sup>13</sup>C NMR** (101 MHz, CDCl<sub>3</sub>)  $\delta$  150.88, 149.59, 148.60, 143.67, 140.01, 138.36, 129.89, 128.32, 127.40, 125.16, 124.10, 119.15, 56.56, 27.72, 27.65, 26.59, 21.73. **HRMS** (ESI)  $m/z$  (M+Na)<sup>+</sup>: calculated for C<sub>19</sub>H<sub>19</sub>NNaO<sub>2</sub>S: 348.1034, found: 348.1027.  $[\alpha]^{20}_D = +6.1$  (c = 0.52, acetone). **The product was analyzed by HPLC to determine the enantiomeric excess:** 87% ee; (CHIRALPAK IG, hexane/i-PrOH = 70/30, flow rate: 0.5 mL/min, T = 30 °C, 254 nm),  $t_R$  (major) = 19.95 min,  $t_R$  (minor) = 17.79 min. The absolute configuration was assigned tentatively by analogy.

(S)-4-methyl-N-(2,3,4,9-tetrahydro-1H-fluoren-9-yl)benzenesulfonamide (**2p**)

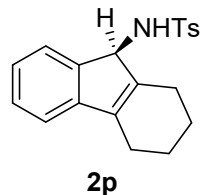

**Yield:** 65%, 22.0 mg. **<sup>1</sup>H NMR** (500 MHz, CDCl<sub>3</sub>)  $\delta$  7.89 – 7.86 (m, 2H), 7.36 (d,  $J$  = 8.0 Hz, 2H), 7.21 (t,  $J$  = 7.5 Hz, 1H), 7.05 (d,  $J$  = 7.4 Hz, 1H), 7.03 – 6.96 (m, 1H), 6.89 (dd,  $J$  = 7.3, 0.5 Hz, 1H), 4.70 (d,  $J$  = 9.5 Hz, 1H), 4.46 (d,  $J$  = 9.5 Hz, 1H), 2.48 (s, 3H), 2.37 – 2.18 (m, 3H), 1.96 (dd,  $J$  = 16.7, 13.0 Hz, 1H), 1.80 – 1.61 (m, 4H). **<sup>13</sup>C NMR** (126 MHz, CDCl<sub>3</sub>)  $\delta$  144.08, 143.66, 143.37, 141.20, 138.59, 137.76, 129.93, 128.36, 127.38, 125.23, 123.33, 118.00, 61.23, 22.89, 22.82, 22.32, 22.12, 21.75. **HRMS** (ESI)  $m/z$  (M+Na)<sup>+</sup>: calculated for C<sub>20</sub>H<sub>21</sub>NNaO<sub>2</sub>S: 362.1191, found: 362.1181.  $[\alpha]^{20}_D = -49.4$  (c = 0.32, acetone). **The product was analyzed by HPLC to determine the enantiomeric excess:** 94% ee; (CHIRALPAK IE, hexane/i-PrOH = 80/20, flow rate: 1.0 mL/min, T = 30 °C, 254 nm),  $t_R$

(major) = 11.81 min,  $t_R$  (minor) = 12.68 min. The absolute configuration was assigned tentatively by analogy.

(S)-N-(2,7-dimethyl-1H-inden-1-yl)-4-methylbenzenesulfonamide (**2q**)

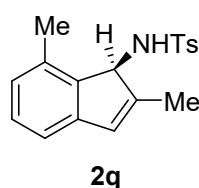

**Yield:** 79%, 24.8 mg.  $^1\text{H NMR}$  (500 MHz,  $\text{CDCl}_3$ )  $\delta$  7.76 (d,  $J$  = 8.2 Hz, 2H), 7.28 (d,  $J$  = 8.1 Hz, 2H), 7.08 (t,  $J$  = 7.5 Hz, 1H), 6.90 (d,  $J$  = 7.3 Hz, 1H), 6.79 (d,  $J$  = 7.6 Hz, 1H), 6.26 (s, 1H), 4.88 (d,  $J$  = 9.5 Hz, 1H), 4.37 (d,  $J$  = 9.5 Hz, 1H), 2.43 (s, 3H), 2.13 (s, 3H), 1.71 (s, 3H).  $^{13}\text{C NMR}$  (126 MHz,  $\text{CDCl}_3$ )  $\delta$  146.33, 143.51, 143.44, 140.15, 139.37, 134.63, 129.70, 128.81, 128.45, 127.37, 127.09, 118.10, 62.53, 21.68, 18.14, 14.56. **HRMS** (ESI)  $m/z$  ( $\text{M}+\text{H}$ ) $^+$ : calculated for  $\text{C}_{18}\text{H}_{20}\text{NO}_2\text{S}$ : 314.1215, found: 314.1208.  $[\alpha]^{20}_{\text{D}}$  = -42.1 ( $c$  = 0.46, acetone). **The product was analyzed by HPLC to determine the enantiomeric excess:** 84% ee; (CHIRALPAK IE, hexane/*i*-PrOH = 70/30, flow rate: 1.0 mL/min,  $T$  = 30 °C, 254 nm),  $t_R$  (major) = 6.56 min,  $t_R$  (minor) = 7.68 min. The absolute configuration was assigned tentatively by analogy.

(S)-N-(2,5-dimethyl-1H-inden-1-yl)-4-methylbenzenesulfonamide (**2r**)

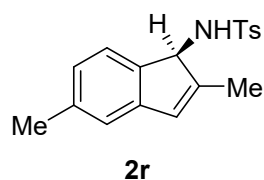

**Yield:** 84%, 26.3 mg.  $^1\text{H NMR}$  (500 MHz,  $\text{CDCl}_3$ )  $\delta$  7.87 (d,  $J$  = 8.1 Hz, 2H), 7.36 (d,  $J$  = 8.0 Hz, 2H), 6.90 (s, 1H), 6.76 (d,  $J$  = 7.5 Hz, 1H), 6.59 (d,  $J$  = 7.5 Hz, 1H), 6.27 (s, 1H), 4.66 (d,  $J$  = 9.6 Hz, 1H), 4.49 (d,  $J$  = 9.6 Hz, 1H), 2.48 (s, 3H), 2.28 (s, 3H), 1.89 (s, 3H).  $^{13}\text{C NMR}$  (126 MHz,  $\text{CDCl}_3$ )  $\delta$  146.34, 143.72, 143.58, 140.59, 138.66, 138.38, 129.95, 127.86, 127.38, 125.62, 123.15, 121.28, 62.26, 21.73, 21.52, 14.05. **HRMS** (ESI)  $m/z$  ( $\text{M}+\text{H}$ ) $^+$ : calculated for  $\text{C}_{18}\text{H}_{20}\text{NO}_2\text{S}$ : 314.1215, found: 314.1209.  $[\alpha]^{20}_{\text{D}}$  = +83.5 ( $c$  = 0.46, acetone). **The product was analyzed by HPLC to determine the enantiomeric excess:** 95% ee; (CHIRALPAK IE, hexane/*i*-PrOH = 70/30, flow rate: 1.0 mL/min,  $T$  = 30 °C, 254 nm),  $t_R$  (major) = 8.66 min,  $t_R$  (minor) = 15.86 min. The absolute configuration was assigned tentatively by analogy.

(S)-N-(2,4-dimethyl-1H-inden-1-yl)-4-methylbenzenesulfonamide (**2s**)

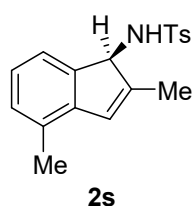

**Yield:** 75%, 23.5 mg.  $^1\text{H NMR}$  (400 MHz,  $\text{CDCl}_3$ )  $\delta$  7.87 (d,  $J$  = 7.8 Hz, 2H), 7.36 (d,  $J$  = 7.8 Hz, 2H), 6.96 (d,  $J$  = 7.5 Hz, 1H), 6.86 (t,  $J$  = 7.4 Hz, 1H), 6.57 (d,  $J$  = 7.3 Hz, 1H), 6.43 (s, 1H), 4.69 (d,  $J$  = 9.5 Hz, 1H), 4.51 (d,  $J$  = 9.5 Hz, 1H), 2.48 (s, 3H), 2.28 (s, 3H), 1.92 (s, 3H).  $^{13}\text{C NMR}$  (101 MHz,  $\text{CDCl}_3$ )  $\delta$  145.52, 143.73, 143.38, 141.93, 138.65, 129.97, 129.70, 129.61, 127.36, 126.10, 125.08, 120.85, 62.78, 21.74, 18.15, 14.12. **HRMS** (ESI)  $m/z$  ( $\text{M}+\text{Na}$ ) $^+$ : calculated for  $\text{C}_{18}\text{H}_{19}\text{NNaO}_2\text{S}$ : 336.1034, found: 336.1029.  $[\alpha]^{20}_{\text{D}}$  = +34.0 ( $c$  = 0.40, acetone). **The product was analyzed by HPLC to determine the enantiomeric excess:** 89% ee; (CHIRALPAK IE, hexane/*i*-PrOH = 70/30, flow rate: 1.0 mL/min,  $T$  = 30 °C, 254 nm),  $t_R$  (major) = 8.20 min,  $t_R$  (minor) = 9.37 min. The absolute configuration was assigned tentatively by analogy.

(S)-N-(5-fluoro-2-methyl-1H-inden-1-yl)-4-methylbenzenesulfonamide (**2t**)

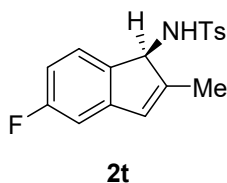

**Yield:** 50%, 15.9 mg.  $^1\text{H NMR}$  (500 MHz,  $\text{CDCl}_3$ )  $\delta$  7.86 (d,  $J$  = 8.2 Hz, 2H), 7.36 (d,  $J$  = 8.1 Hz, 2H), 6.76 (dd,  $J$  = 8.7, 2.2 Hz, 1H), 6.72 (dd,  $J$  = 8.1, 5.1 Hz, 1H), 6.66 – 6.59 (m, 1H), 6.27 (s, 1H), 4.65 (d,  $J$  = 9.7 Hz, 1H), 4.60 (d,  $J$  = 9.7 Hz, 1H), 2.48 (s, 3H), 1.88 (s, 3H).  $^{13}\text{C NMR}$  (126 MHz,

CDCl<sub>3</sub>)  $\delta$  163.52 (d,  $J$  = 244.6 Hz), 148.46, 145.38 (d,  $J$  = 9.3 Hz), 143.91, 138.83 (d,  $J$  = 2.6 Hz), 138.46, 130.01, 127.35, 127.27 (d,  $J$  = 2.7 Hz), 124.45 (d,  $J$  = 9.2 Hz), 111.38, 111.20, 108.03, 107.85, 61.87, 21.73, 14.12. <sup>19</sup>F NMR (471 MHz, CDCl<sub>3</sub>)  $\delta$  -114.19. HRMS (ESI)  $m/z$  (M+Na)<sup>+</sup>: calculated for C<sub>17</sub>H<sub>16</sub>FNNaO<sub>2</sub>S: 340.0783, found: 340.0776.  $[\alpha]^{20}_D$  = -84.0 ( $c$  = 0.29, acetone). **The product was analyzed by HPLC to determine the enantiomeric excess: 95% ee; (CHIRALPAK IE, hexane/i-PrOH = 70/30, flow rate: 1.0 mL/min, T = 30 °C, 254 nm),  $t_R$  (major) = 6.89 min,  $t_R$  (minor) = 9.60 min. The absolute configuration was assigned tentatively by analogy.**

(S)-N-(5-methoxy-2-methyl-1H-inden-1-yl)-4-methylbenzenesulfonamide (**2u**)

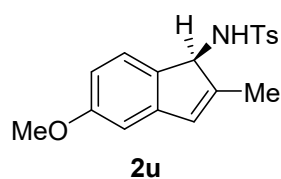

**Yield:** 74%, 24.4 mg. <sup>1</sup>H NMR (500 MHz, CDCl<sub>3</sub>)  $\delta$  7.87 (d,  $J$  = 8.1 Hz, 2H), 7.36 (d,  $J$  = 8.1 Hz, 2H), 6.64 (d,  $J$  = 2.2 Hz, 1H), 6.60 (d,  $J$  = 8.2 Hz, 1H), 6.46 (dd,  $J$  = 8.2, 2.2 Hz, 1H), 6.27 (s, 1H), 4.65 (d,  $J$  = 9.6 Hz, 1H), 4.49 (d,  $J$  = 9.6 Hz, 1H), 3.75 (s, 3H), 2.48 (s, 3H), 1.90 (s, 3H). <sup>13</sup>C NMR (126 MHz, CDCl<sub>3</sub>)  $\delta$  160.33, 147.51, 144.88, 143.64, 138.55, 135.30, 129.87, 127.62, 127.27, 123.91, 109.54, 106.89, 61.86, 55.43, 21.63, 14.03. HRMS (ESI)  $m/z$  (M+Na)<sup>+</sup>: calculated for C<sub>18</sub>H<sub>19</sub>NNaO<sub>3</sub>S: 352.0983, found: 352.0983.  $[\alpha]^{20}_D$  = +36.1 ( $c$  = 0.32, acetone). **The product was analyzed by HPLC to determine the enantiomeric excess: 92% ee; (CHIRALPAK AD-H, hexane/i-PrOH = 70/30, flow rate: 1.0 mL/min, T = 30 °C, 254 nm),  $t_R$  (major) = 7.71 min,  $t_R$  (minor) = 9.93 min. The absolute configuration was assigned tentatively by analogy.**

(S)-N-(5-chloro-2-methyl-1H-inden-1-yl)-4-methylbenzenesulfonamide (**2v**)

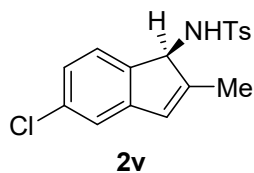

**Yield:** 45%, 15.0 mg. <sup>1</sup>H NMR (400 MHz, CDCl<sub>3</sub>)  $\delta$  7.95 – 7.78 (m, 2H), 7.36 (dd,  $J$  = 8.5, 0.6 Hz, 2H), 7.06 (d,  $J$  = 1.9 Hz, 1H), 6.93 (dd,  $J$  = 7.9, 1.9 Hz, 1H), 6.72 – 6.69 (m, 1H), 6.28 (dt,  $J$  = 1.6, 0.6 Hz, 1H), 4.73 – 4.60 (m, 1H), 4.55 (d,  $J$  = 9.7 Hz, 1H), 2.48 (s, 3H), 1.88 (d,  $J$  = 0.7 Hz, 3H). <sup>13</sup>C NMR (126 MHz, CDCl<sub>3</sub>)  $\delta$  148.01, 145.03, 143.98, 141.75, 138.42, 134.47, 130.04, 127.37, 127.18, 124.90, 124.44, 120.73, 62.08, 21.75, 14.09. HRMS (ESI)  $m/z$  (M+H)<sup>+</sup>: calculated for C<sub>17</sub>H<sub>17</sub>ClNO<sub>2</sub>S: 334.0669, found: 334.0661.  $[\alpha]^{20}_D$  = +68.5 ( $c$  = 0.40, acetone). **The product was analyzed by HPLC to determine the enantiomeric excess: 95% ee; (CHIRALPAK IE, hexane/i-PrOH = 70/30, flow rate: 1.0 mL/min, T = 30 °C, 254 nm),  $t_R$  (major) = 7.38 min,  $t_R$  (minor) = 13.05 min. The absolute configuration was assigned tentatively by analogy.**

(S)-4-methyl-N-(6-methyl-5H-indeno[5,6-d][1,3]dioxol-5-yl)benzenesulfonamide (**2w**)

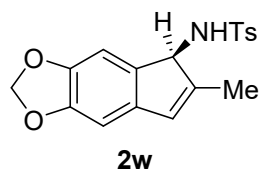

**Yield:** 93%, 40.4 mg. <sup>1</sup>H NMR (400 MHz, CDCl<sub>3</sub>)  $\delta$  7.86 (d,  $J$  = 8.3 Hz, 2H), 7.36 (dd,  $J$  = 8.6, 0.6 Hz, 2H), 6.57 (s, 1H), 6.30 (s, 1H), 6.21 – 6.17 (m, 1H), 5.87 (d,  $J$  = 1.4 Hz, 1H), 5.87 (d,  $J$  = 1.4 Hz, 1H), 4.57 (s, 2H), 2.47 (s, 3H), 1.83 (d,  $J$  = 1.5 Hz, 3H). <sup>13</sup>C NMR (126 MHz, CDCl<sub>3</sub>)  $\delta$  147.78, 145.60, 144.96, 143.86, 138.57, 137.22, 136.97, 130.00, 127.40, 127.34, 105.59, 101.85, 101.12, 62.18, 21.72, 13.97. HRMS (ESI)  $m/z$  (M+Na)<sup>+</sup>: calculated for C<sub>18</sub>H<sub>17</sub>NNaO<sub>4</sub>S: 366.0776, found: 366.0768.  $[\alpha]^{20}_D$  = -83.9 ( $c$  = 0.29, acetone). **The product was analyzed by HPLC to determine the enantiomeric excess: 93% ee; (CHIRALPAK IE, hexane/i-PrOH = 70/30, flow rate: 1.0 mL/min, T = 30 °C, 254 nm),  $t_R$  (major) = 7.97 min,  $t_R$  (minor) = 11.40 min. The absolute configuration was assigned tentatively by analogy.**



4-methyl-N-((6aR,7S,11bS)-6,6a,7,11b-tetrahydroindeno[2,1-c]chromen-7-yl)benzenesulfonamide (**4a**)

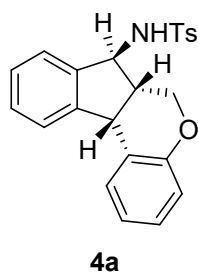

**Yield:** 73%, 28.6 mg.  $^1\text{H NMR}$  (400 MHz,  $\text{CDCl}_3$ )  $\delta$  7.87 (d,  $J = 8.2$  Hz, 2H), 7.44 (d,  $J = 7.6$  Hz, 1H), 7.35 (d,  $J = 8.0$  Hz, 3H), 7.23 (d,  $J = 7.5$  Hz, 1H), 7.17 – 7.05 (m, 2H), 6.91 (t,  $J = 7.5$  Hz, 1H), 6.84 (d,  $J = 8.1$  Hz, 2H), 4.97 (d,  $J = 8.7$  Hz, 1H), 4.90 – 4.81 (m, 1H), 4.45 (d,  $J = 7.8$  Hz, 1H), 4.08 (dd,  $J = 11.3$ , 3.1 Hz, 1H), 3.98 (dd,  $J = 11.3$ , 5.0 Hz, 1H), 2.81 – 2.69 (m, 1H), 2.46 (s, 3H).  $^{13}\text{C NMR}$  (101 MHz,  $\text{CDCl}_3$ )  $\delta$  154.67, 144.73, 143.88, 140.74, 138.01, 130.08, 129.80, 129.07, 128.05, 127.76, 127.24, 125.26, 124.77, 123.41, 121.51, 117.80, 64.55, 58.71, 47.74, 41.37, 21.74. **HRMS** (ESI)  $m/z$  ( $\text{M}+\text{H}$ ) $^+$ : calculated for  $\text{C}_{23}\text{H}_{22}\text{NO}_3\text{S}$ : 392.1320, found: 392.1320.

$[\alpha]_D^{20} = -39.5$  ( $c = 0.34$ , acetone). The product was analyzed by HPLC to determine the enantiomeric excess: 91% ee; (CHIRALPAK IE, hexane/*i*-PrOH = 70/30, flow rate: 1.0 mL/min,  $T = 30^\circ\text{C}$ , 254 nm),  $t_R$  (major) = 14.27 min,  $t_R$  (minor) = 12.20 min. The absolute configuration was assigned tentatively by analogy.

4-methyl-N-((6aR,7S,11bS)-2-methyl-6,6a,7,11b-tetrahydroindeno[2,1-c]chromen-7-yl)benzenesulfonamide (**4b**)

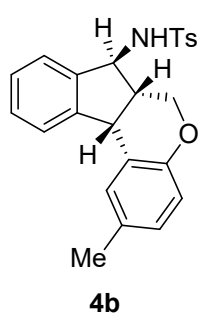

**Yield:** 63%, 25.5 mg.  $^1\text{H NMR}$  (400 MHz,  $\text{CDCl}_3$ )  $\delta$  7.90 – 7.83 (m, 2H), 7.45 (d,  $J = 7.6$  Hz, 1H), 7.35 (d,  $J = 8.0$  Hz, 2H), 7.28 – 7.22 (m, 1H), 7.13 (dt,  $J = 10.2$ , 5.0 Hz, 2H), 6.89 (dd,  $J = 8.3$ , 2.1 Hz, 1H), 6.84 (d,  $J = 7.6$  Hz, 1H), 6.74 (d,  $J = 8.3$  Hz, 1H), 4.99 (d,  $J = 8.8$  Hz, 1H), 4.92 – 4.83 (m, 1H), 4.40 (d,  $J = 7.9$  Hz, 1H), 4.04 (dd,  $J = 11.3$ , 3.1 Hz, 1H), 3.96 (dd,  $J = 11.3$ , 4.8 Hz, 1H), 2.77 – 2.66 (m, 1H), 2.46 (s, 3H), 2.26 (s, 3H).  $^{13}\text{C NMR}$  (101 MHz,  $\text{CDCl}_3$ )  $\delta$  152.42, 144.76, 143.84, 140.87, 138.05, 130.71, 130.06, 129.95, 129.01, 128.48, 127.99, 127.23, 125.28, 124.73, 123.07, 117.53, 64.52, 58.66, 47.93, 41.37, 21.73, 20.83. **HRMS** (ESI)  $m/z$  ( $\text{M}+\text{H}$ ) $^+$ : calculated for  $\text{C}_{24}\text{H}_{24}\text{NO}_3\text{S}$ : 406.1477, found: 406.1473.  $[\alpha]_D^{20} = -20.9$  ( $c = 0.093$ , acetone). The product was analyzed by HPLC to determine the enantiomeric excess: 91% ee; (CHIRALPAK IE, hexane/*i*-PrOH = 70/30, flow rate: 1.0 mL/min,  $T = 30^\circ\text{C}$ , 254 nm),  $t_R$  (major) = 14.57 min,  $t_R$  (minor) = 10.30 min. The absolute configuration was assigned tentatively by analogy.

N-((6aR,7S,11bS)-2-ethyl-6,6a,7,11b-tetrahydroindeno[2,1-c]chromen-7-yl)-4-methylbenzenesulfonamide (**4c**)

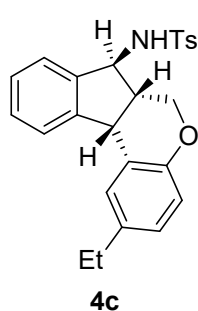

**Yield:** 63%, 26.4 mg.  $^1\text{H NMR}$  (500 MHz,  $\text{CDCl}_3$ )  $\delta$  7.87 (d,  $J = 8.0$  Hz, 2H), 7.45 (d,  $J = 7.5$  Hz, 1H), 7.35 (d,  $J = 7.9$  Hz, 2H), 7.31 – 7.21 (m, 1H), 7.17 (s, 1H), 7.13 (t,  $J = 7.5$  Hz, 1H), 6.92 (d,  $J = 8.2$  Hz, 1H), 6.86 (d,  $J = 7.5$  Hz, 1H), 6.77 (d,  $J = 8.3$  Hz, 1H), 4.94 (d,  $J = 8.7$  Hz, 1H), 4.91 – 4.82 (m, 1H), 4.42 (d,  $J = 7.8$  Hz, 1H), 4.05 (dd,  $J = 11.2$ , 2.6 Hz, 1H), 3.96 (dd,  $J = 11.2$ , 4.9 Hz, 1H), 2.77 – 2.70 (m, 1H), 2.56 (q,  $J = 7.5$  Hz, 2H), 2.46 (s, 3H), 1.20 (t,  $J = 7.6$  Hz, 3H).  $^{13}\text{C NMR}$  (126 MHz,  $\text{CDCl}_3$ )  $\delta$  152.63, 144.84, 143.85, 140.85, 138.07, 137.24, 130.06, 129.04, 128.82, 127.99, 127.28, 127.26, 125.26, 124.77, 123.08, 117.58, 64.58, 58.74, 47.86, 41.47, 28.27, 21.73, 15.95. **HRMS** (ESI)  $m/z$  ( $\text{M}+\text{H}$ ) $^+$ :

calculated for  $C_{25}H_{26}NO_3S$ : 420.1633, found: 420.1636.  $[\alpha]^{20}_D = -44.6$  ( $c = 0.25$ , acetone). **The product was analyzed by HPLC to determine the enantiomeric excess:** 91% ee; (CHIRALPAK IE, hexane/i-PrOH = 70/30, flow rate: 1.0 mL/min,  $T = 30\text{ }^\circ\text{C}$ , 254 nm),  $t_R$  (major) = 12.74 min,  $t_R$  (minor) = 17.37 min. The absolute configuration was assigned tentatively by analogy.

N-((6aR,7S,11bS)-2-fluoro-6,6a,7,11b-tetrahydroindeno[2,1-c]chromen-7-yl)-4-methylbenzenesulfonamide (**4d**)

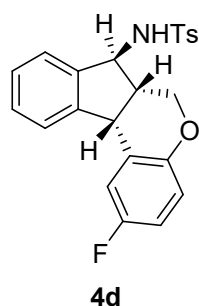

**Yield:** 56%, 22.9 mg.  $^1\text{H NMR}$  (400 MHz,  $\text{CDCl}_3$ )  $\delta$  7.87 (d,  $J = 8.3$  Hz, 2H), 7.42 (d,  $J = 7.6$  Hz, 1H), 7.35 (d,  $J = 8.1$  Hz, 2H), 7.30 – 7.22 (m, 1H), 7.15 (t,  $J = 7.5$  Hz, 1H), 7.07 – 6.98 (m, 1H), 6.83 (d,  $J = 7.6$  Hz, 1H), 6.78 (dd,  $J = 7.5$ , 1.8 Hz, 2H), 4.95 – 4.83 (m, 2H), 4.41 (d,  $J = 7.9$  Hz, 1H), 4.04 (d,  $J = 3.7$  Hz, 2H), 2.77 – 2.72 (m, 1H), 2.46 (s, 3H).  $^{13}\text{C NMR}$  (126 MHz,  $\text{CDCl}_3$ )  $\delta$  157.38 (d,  $J = 239.5$  Hz), 150.74, 144.06, 143.97, 140.88, 138.02, 130.12, 129.26, 128.35, 127.27, 125.19, 124.71, 118.90 (d,  $J = 8.1$  Hz), 115.43 (d,  $J = 22.9$  Hz), 114.81, 114.63, 64.72, 58.61, 47.96, 41.63, 21.76. **HRMS** (ESI)  $m/z$  ( $M+H$ ) $^+$ :

calculated for  $C_{23}H_{21}FNO_3S$ : 410.1226, found: 410.1228.  $[\alpha]^{20}_D = -36.2$  ( $c = 0.5$ , acetone). **The product was analyzed by HPLC to determine the enantiomeric excess:** 92% ee; (CHIRALPAK IE, hexane/i-PrOH = 70/30, flow rate: 1.0 mL/min,  $T = 30\text{ }^\circ\text{C}$ , 254 nm),  $t_R$  (major) = 11.32 min,  $t_R$  (minor) = 9.53 min. The absolute configuration was assigned tentatively by analogy.

N-((6aR,7S,11bS)-2-methoxy-6,6a,7,11b-tetrahydroindeno[2,1-c]chromen-7-yl)-4-methylbenzenesulfonamide (**4e**)

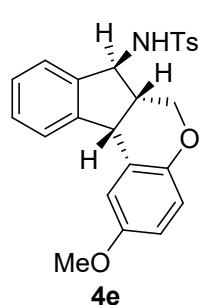

**Yield:** 61%, 25.7 mg.  $^1\text{H NMR}$  (500 MHz,  $\text{CDCl}_3$ )  $\delta$  7.87 (d,  $J = 8.3$  Hz, 2H), 7.44 (d,  $J = 7.6$  Hz, 1H), 7.35 (d,  $J = 8.0$  Hz, 2H), 7.24 (t,  $J = 7.6$  Hz, 1H), 7.13 (t,  $J = 7.4$  Hz, 1H), 6.88 (d,  $J = 2.8$  Hz, 1H), 6.83 (d,  $J = 7.5$  Hz, 1H), 6.78 (d,  $J = 8.9$  Hz, 1H), 6.66 (dd,  $J = 8.9$ , 2.9 Hz, 1H), 4.95 – 4.83 (m, 2H), 4.41 (d,  $J = 8.0$  Hz, 1H), 4.06 – 3.96 (m, 2H), 3.75 (s, 3H), 2.75 – 2.70 (m, 1H), 2.46 (s, 3H).  $^{13}\text{C NMR}$  (126 MHz,  $\text{CDCl}_3$ )  $\delta$  154.05, 148.67, 144.53, 143.87, 140.96, 138.06, 130.07, 129.08, 128.11, 127.25, 125.21, 124.71, 124.23, 118.37, 114.52, 113.42, 64.66, 58.68, 55.83, 48.07, 41.75, 21.74. **HRMS** (ESI)  $m/z$  ( $M+H$ ) $^+$ :

calculated for  $C_{24}H_{24}NO_4S$ : 422.1426, found: 422.1426.  $[\alpha]^{20}_D = -50.6$  ( $c = 0.40$ , acetone). **The product was analyzed by HPLC to determine the enantiomeric excess:** 92% ee; (CHIRALPAK IE, hexane/i-PrOH = 70/30, flow rate: 1.0 mL/min,  $T = 30\text{ }^\circ\text{C}$ , 254 nm),  $t_R$  (major) = 24.94 min,  $t_R$  (minor) = 14.96 min. The absolute configuration was assigned tentatively by analogy.

## 7. Procedure for the synthesis of 7.

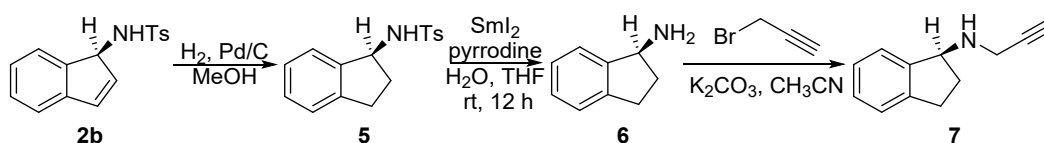

To the Schlenk tube charged with a solution of **2b** (2.8 mmol, 0.8 g, 83% ee) in anhydrous  $\text{CH}_3\text{OH}$  (10 mL) were added 10% Pd/C (0.1 equiv, 0.28 mmol, 280 mg) and a stir ball. After being stirred at  $25\text{ }^\circ\text{C}$  under a  $\text{H}_2$  atmosphere overnight, the mixture was filtrated with silica gel and concentrated

in vacuo. The residue was purified by flash column chromatography on silica gel (EtOAc: Petroleum ether = 1 : 10) to give **5** (0.740 g) in 95% yield.

To a round bottom flask containing compound **5** (0.114 g, 0.4 mmol) was added solution of  $\text{SmI}_2$  (40 mL, 0.1 M, 4 mmol),  $\text{H}_2\text{O}$  (0.108 g, 6 mmol), and pyrrolidine (0.284 g, 2 mmol). The solution was stirred at room temperature for 12 h. The mixture was diluted with EtOAc, washed with  $\text{NaHCO}_3$ , extracted with EtOAc, dried over  $\text{Na}_2\text{SO}_4$ , and filtered. The filtrate was evaporated under reduced pressure and the resulting residue was purified by flash column chromatography (EtOAc: Petroleum ether = 1: 20) on silica gel to afford **6** (0.040 g) in 76% yield.

Potassium carbonate (0.028 g, 0.2 mmol) was added to a solution of **6** (0.026 g, 0.2 mmol) in acetonitrile (5 mL). Propargyl bromide (0.024 g, 0.2 mmol) was added to the reaction mixture with stirring at room temperature. After stirring at 30 °C for 12 h, potassium carbonate was filtered off, and acetonitrile was removed by evaporation under reduced pressure. Water (10 mL) was added to the mixture. The mixture was extracted with  $\text{Et}_2\text{O}$  (10 mL  $\times$  3). The combined organic phase was washed with saturated aqueous NaCl and dried over  $\text{MgSO}_4$ , then concentrated in vacuo. The crude residue was purified by silica chromatography (EtOAc: Petroleum ether = 1: 40) to give **7** (0.027 g) in 79% yield.

## 8. Characterizations for the products **5**, **6** and **7**.

(S)-N-(2,3-dihydro-1H-inden-1-yl)-4-methylbenzenesulfonamide (**5**)

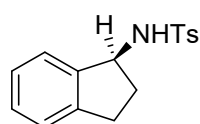

**Yield:** 95%, 0.74 g.  $^1\text{H}$  NMR (400 MHz,  $\text{CDCl}_3$ )  $\delta$  7.83 (d,  $J$  = 8.3 Hz, 2H), 7.34 (d,  $J$  = 8.1 Hz, 2H), 7.24 – 7.11 (m, 3H), 7.08 (d,  $J$  = 7.4 Hz, 1H), 4.88 – 4.67 (m, 2H), 2.89 (ddd,  $J$  = 16.0, 8.7, 3.6 Hz, 1H), 2.77 – 2.69 (m, 1H), 2.45 (s, 3H), 2.37 – 2.27 (m, 1H), 1.79 – 1.70 (m, 1H).  $^{13}\text{C}$  NMR (101 MHz,  $\text{CDCl}_3$ )  $\delta$  143.61, 142.96, 142.11, 138.30, 129.93, 128.43, 127.27, 126.99, 124.94, 124.21, 58.85, 34.87, 30.09, 21.71. **HRMS** (ESI)  $m/z$  ( $\text{M}+\text{Na}$ ) $^+$ : calculated for  $\text{C}_{16}\text{H}_{17}\text{NNaO}_2\text{S}$ : 310.0878, found: 310.0871.  $[\alpha]_D^{20}$  = -23.9 ( $c$  = 0.53, acetone). **The product was analyzed by HPLC to determine the enantiomeric excess:** 83% ee; (CHIRALPAK IE, hexane/*i*-PrOH = 70/30, flow rate: 1.0 mL/min,  $T$  = 30 °C, 254 nm),  $t_R$  (major) = 24.14 min,  $t_R$  (minor) = 36.99 min. The absolute configuration was assigned tentatively by analogy.

(S)-2,3-dihydro-1H-inden-1-amine (**6**)

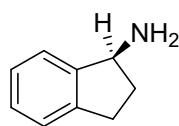

**Yield:** 76%, 40.0 mg.  $^1\text{H}$  NMR (400 MHz,  $\text{CDCl}_3$ )  $\delta$  7.34 – 7.32 (m, 1H), 7.25 – 7.17 (m, 3H), 4.36 (t,  $J$  = 7.5 Hz, 1H), 2.96 (ddd,  $J$  = 15.8, 8.6, 3.2 Hz, 1H), 2.89 – 2.73 (m, 1H), 2.54 – 2.47 (m, 1H), 1.74 – 1.64 (m, 3H).  $^{13}\text{C}$  NMR (101 MHz,  $\text{CDCl}_3$ )  $\delta$  147.48, 143.14, 127.24, 126.54, 124.73, 123.36, 57.31, 37.39, 30.16. **HRMS** (ESI)  $m/z$  ( $\text{M}+\text{H}$ ) $^+$ : calculated for  $\text{C}_9\text{H}_{12}\text{N}$ : 134.0970, found: 134.0970.  $[\alpha]_D^{20}$  = -53.4 ( $c$  = 0.5, acetone). **The product was analyzed by HPLC to determine the enantiomeric excess:** 88% ee; (CHIRALPAK IE, hexane/*i*-PrOH = 70/30, flow rate: 1.0 mL/min,  $T$  = 30 °C, 254 nm),  $t_R$  (major) = 7.97 min,  $t_R$  (minor) = 11.40 min. The absolute configuration was assigned tentatively by analogy.

(S)-N-(prop-2-yn-1-yl)-2,3-dihydro-1H-inden-1-amine (**7**)

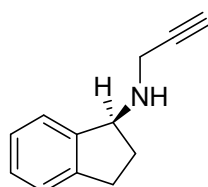

**Yield:** 79%, 27.0 mg.  $^1\text{H}$  NMR (400 MHz,  $\text{CDCl}_3$ )  $\delta$  7.35 (d,  $J$  = 6.6 Hz, 1H), 7.26 – 7.15 (m, 3H), 4.42 (t,  $J$  = 6.0 Hz, 1H), 3.61 – 3.44 (m, 2H), 3.10 – 2.98

(m, 1H), 2.90 – 2.77 (m, 1H), 2.45 – 2.26 (m, 1H), 2.26 (s, 1H), 1.91 – 1.83 (m, 1H), 1.54 (brs, 1H). <sup>13</sup>C NMR (101 MHz, CDCl<sub>3</sub>) δ 144.61, 143.94, 127.76, 126.38, 125.00, 124.31, 82.60, 71.52, 61.98, 36.29, 33.45, 30.58. HRMS (ESI) m/z (M+H)<sup>+</sup>: calculated for C<sub>12</sub>H<sub>14</sub>N: 172.1126, found: 172.1110. [α]<sup>20</sup><sub>D</sub> = -4.2 (c = 0.54, acetone). **The product was analyzed by HPLC to determine the enantiomeric excess: 89% ee; (CHIRALPAK AS, hexane/i-PrOH = 97/3, flow rate: 1.0 mL/min, T = 30 °C, 254 nm), t<sub>R</sub> (major) = 5.18 min, t<sub>R</sub> (minor) = 5.95 min. The absolute configuration was assigned tentatively by analogy.**

## 9. X-ray Single Crystal Data for 2e

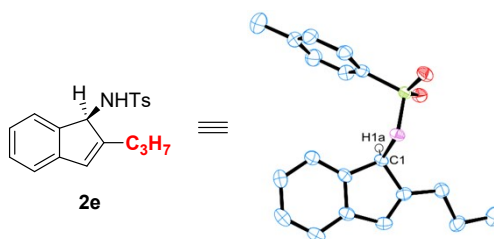

|                                   |                                                    |                    |
|-----------------------------------|----------------------------------------------------|--------------------|
| Identification code               | 191118shc                                          |                    |
| Empirical formula                 | C <sub>19</sub> H <sub>21</sub> N O <sub>2</sub> S |                    |
| Formula weight                    | 327.43                                             |                    |
| Temperature                       | 170.02 K                                           |                    |
| Wavelength                        | 1.34139 Å                                          |                    |
| Crystal system                    | Triclinic                                          |                    |
| Space group                       | P1                                                 |                    |
| Unit cell dimensions              | a = 5.1578(3) Å                                    | α = 92.623(2)°.    |
|                                   | b = 8.9611(4) Å                                    | β = 103.7520(10)°. |
|                                   | c = 9.5418(5) Å                                    | γ = 95.143(2)°.    |
| Volume                            | 425.62(4) Å <sup>3</sup>                           |                    |
| Z                                 | 1                                                  |                    |
| Density (calculated)              | 1.277 Mg/m <sup>3</sup>                            |                    |
| Absorption coefficient            | 1.140 mm <sup>-1</sup>                             |                    |
| F(000)                            | 174                                                |                    |
| Crystal size                      | 0.08 x 0.06 x 0.05 mm <sup>3</sup>                 |                    |
| Theta range for data collection   | 5.790 to 54.965°.                                  |                    |
| Index ranges                      | -6 ≤ h ≤ 6, -10 ≤ k ≤ 10, -11 ≤ l ≤ 11             |                    |
| Reflections collected             | 7143                                               |                    |
| Independent reflections           | 3092 [R(int) = 0.0477]                             |                    |
| Completeness to theta = 53.594°   | 98.5 %                                             |                    |
| Absorption correction             | Semi-empirical from equivalents                    |                    |
| Max. and min. transmission        | 0.7508 and 0.5114                                  |                    |
| Refinement method                 | Full-matrix least-squares on F <sup>2</sup>        |                    |
| Data / restraints / parameters    | 3092 / 3 / 214                                     |                    |
| Goodness-of-fit on F <sup>2</sup> | 1.071                                              |                    |
| Final R indices [I > 2σ(I)]       | R1 = 0.0368, wR2 = 0.0916                          |                    |
| R indices (all data)              | R1 = 0.0374, wR2 = 0.0922                          |                    |
| Absolute structure parameter      | 0.048(11)                                          |                    |
| Extinction coefficient            | n/a                                                |                    |
| Largest diff. peak and hole       | 0.384 and -0.232 e.Å <sup>-3</sup>                 |                    |

## 10. X-ray Single Crystal Data for 4e

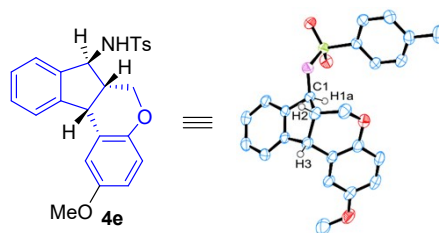

|                                   |                                                                                                          |
|-----------------------------------|----------------------------------------------------------------------------------------------------------|
| Identification code               | 200110dd_0m                                                                                              |
| Empirical formula                 | C <sub>24</sub> H <sub>23</sub> N O <sub>4</sub> S                                                       |
| Formula weight                    | 421.49                                                                                                   |
| Temperature                       | 200 K                                                                                                    |
| Wavelength                        | 1.34139 Å                                                                                                |
| Crystal system                    | Monoclinic                                                                                               |
| Space group                       | P 1 21 1                                                                                                 |
| Unit cell dimensions              | a = 8.1788(3) Å      α = 90°.<br>b = 7.7926(3) Å      β = 103.581(2)°.<br>c = 16.7712(6) Å      γ = 90°. |
| Volume                            | 1039.01(7) Å <sup>3</sup>                                                                                |
| Z                                 | 2                                                                                                        |
| Density (calculated)              | 1.347 Mg/m <sup>3</sup>                                                                                  |
| Absorption coefficient            | 1.064 mm <sup>-1</sup>                                                                                   |
| F(000)                            | 444                                                                                                      |
| Crystal size                      | 0.1 x 0.08 x 0.006 mm <sup>3</sup>                                                                       |
| Theta range for data collection   | 4.720 to 54.960°.                                                                                        |
| Index ranges                      | -9 ≤ h ≤ 9, -9 ≤ k ≤ 9, -20 ≤ l ≤ 20                                                                     |
| Reflections collected             | 13886                                                                                                    |
| Independent reflections           | 3912 [R(int) = 0.0470]                                                                                   |
| Completeness to theta = 53.594°   | 99.5 %                                                                                                   |
| Absorption correction             | Semi-empirical from equivalents                                                                          |
| Max. and min. transmission        | 0.7508 and 0.6256                                                                                        |
| Refinement method                 | Full-matrix least-squares on F <sup>2</sup>                                                              |
| Data / restraints / parameters    | 3912 / 1 / 273                                                                                           |
| Goodness-of-fit on F <sup>2</sup> | 1.048                                                                                                    |
| Final R indices [I > 2σ(I)]       | R1 = 0.0356, wR2 = 0.0896                                                                                |
| R indices (all data)              | R1 = 0.0389, wR2 = 0.0926                                                                                |
| Absolute structure parameter      | 0.037(10)                                                                                                |
| Extinction coefficient            | n/a                                                                                                      |
| Largest diff. peak and hole       | 0.286 and -0.320 e.Å <sup>-3</sup>                                                                       |

## 11. NMR spectra for substrates, products, 5, 6 and 7.

4-methyl-N-((E)-2-((E)-prop-1-en-1-yl)benzylidene)benzenesulfonamide (**1a**)

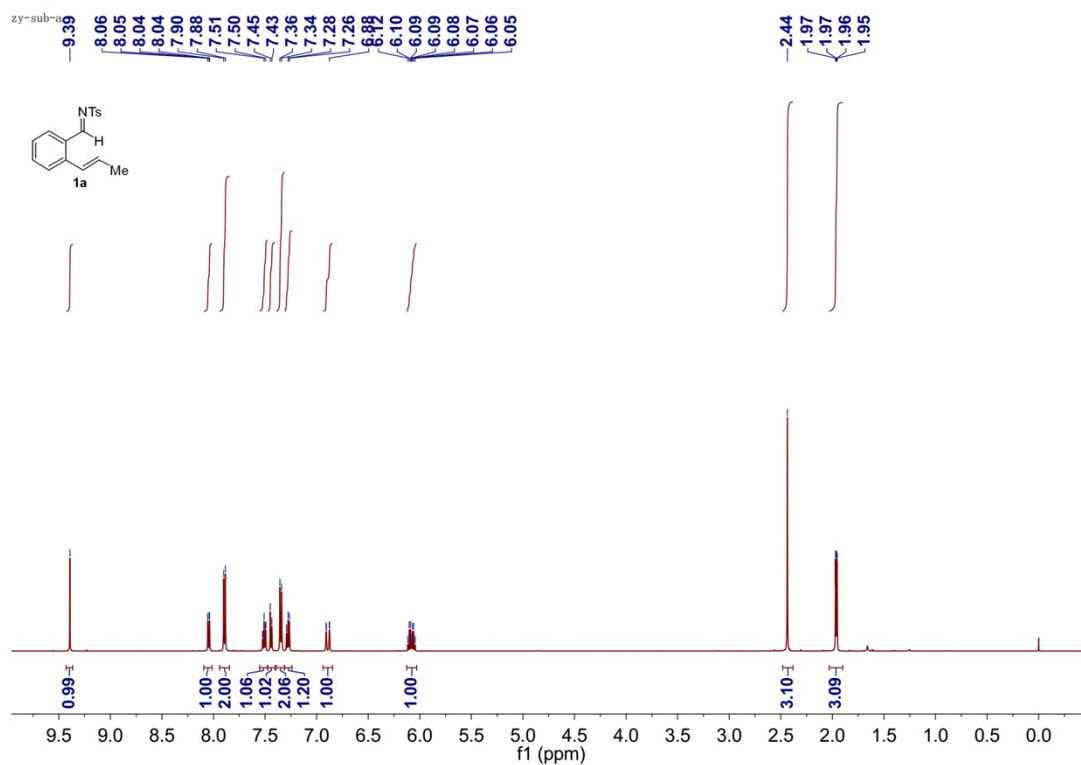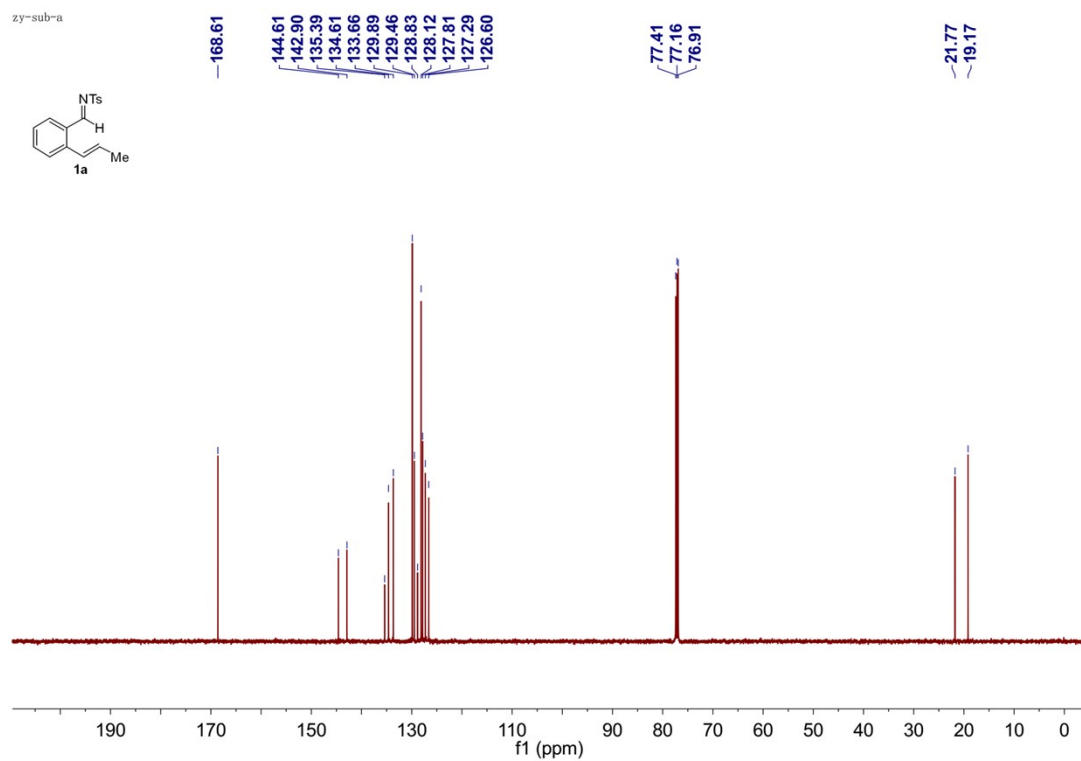

4-methyl-N-((E)-2-((E)-prop-1-en-1-yl)benzylidene)benzenesulfonamide (**1b**)

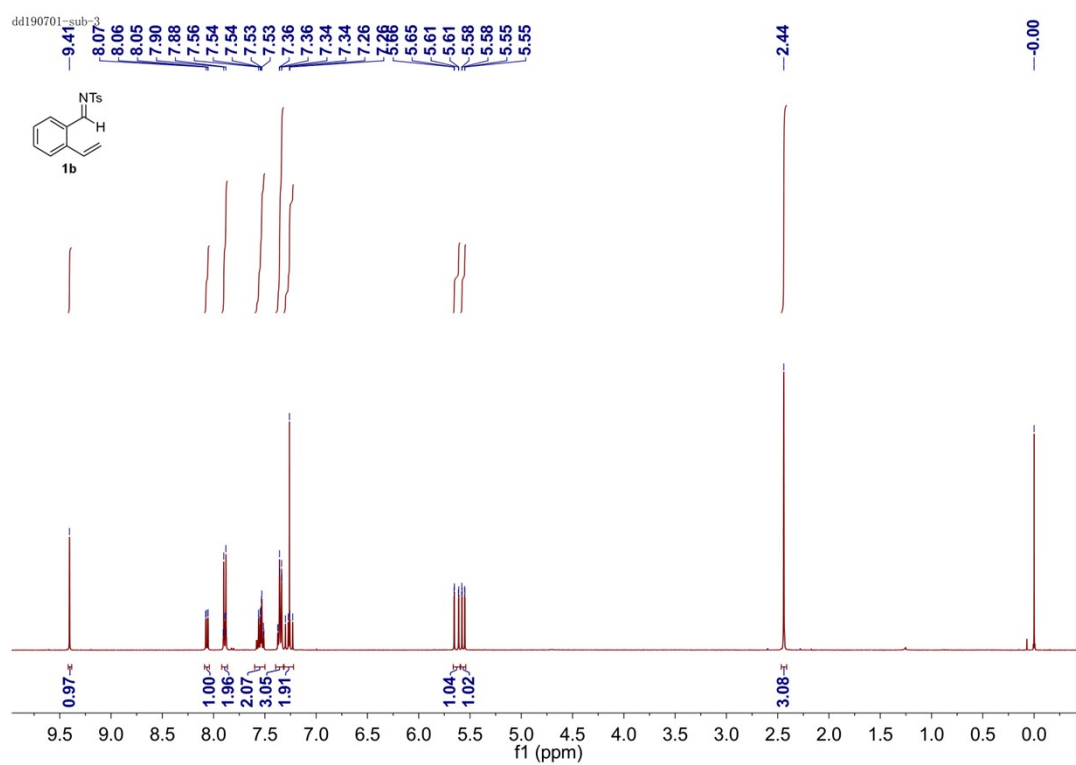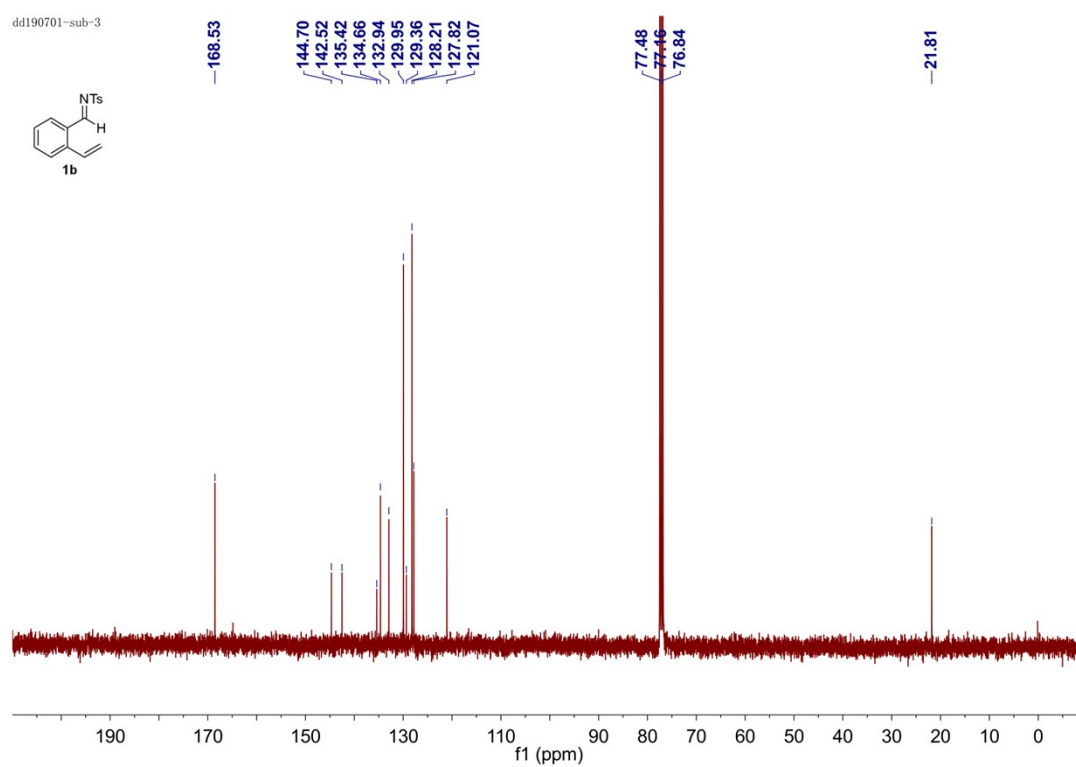



4-methyl-N-((E)-2-((E)-styryl)benzylidene)benzenesulfonamide (**1c**)

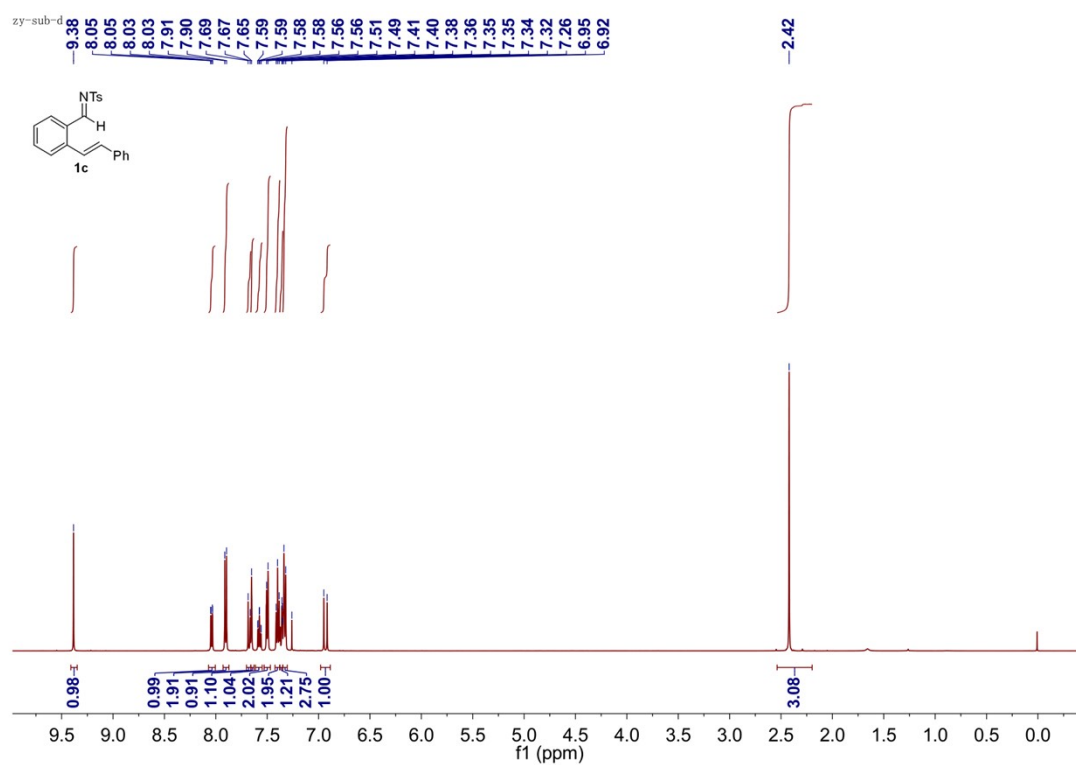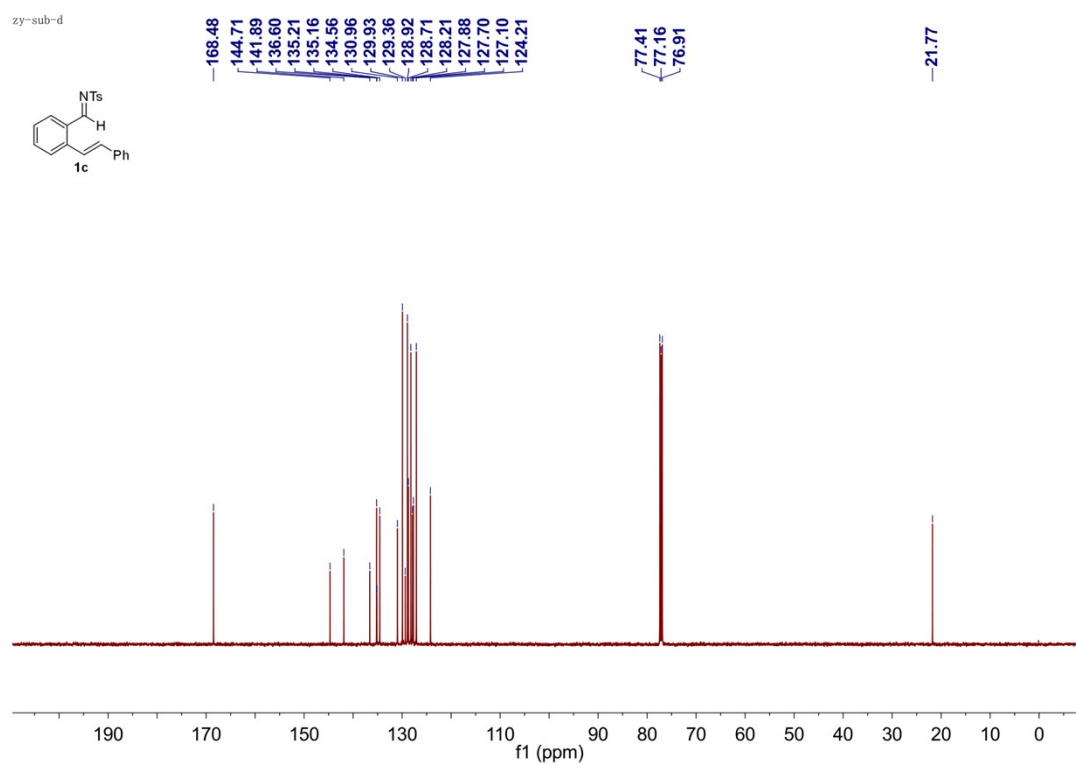

4-methyl-N-((E)-2-((E)-3-phenylprop-1-en-1-yl)benzylidene)benzenesulfonamide (**1d**)

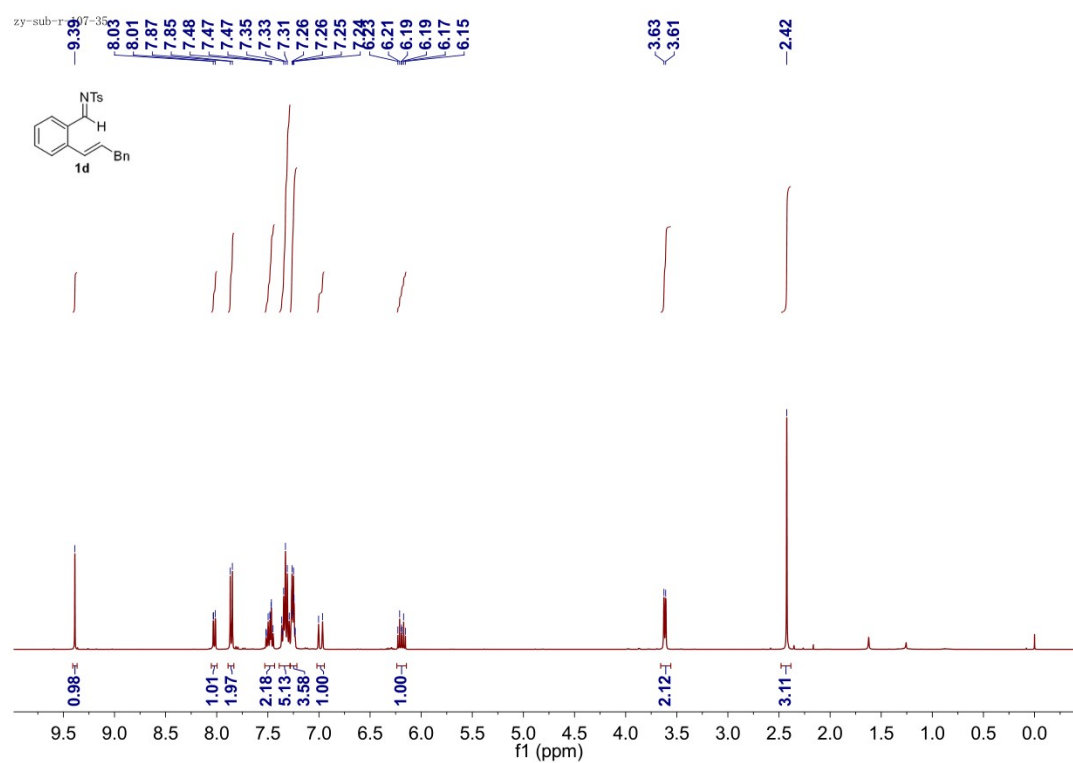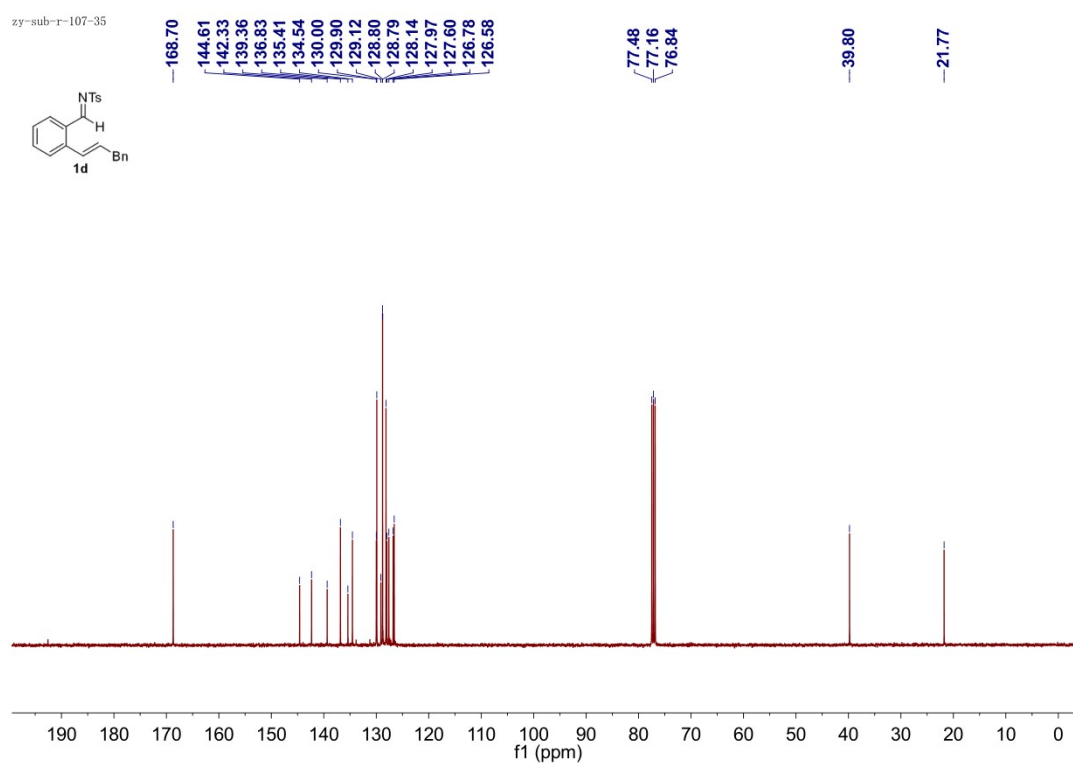

4-methyl-N-((E)-2-((E)-pent-1-en-1-yl)benzylidene)benzenesulfonamide (**1e**)

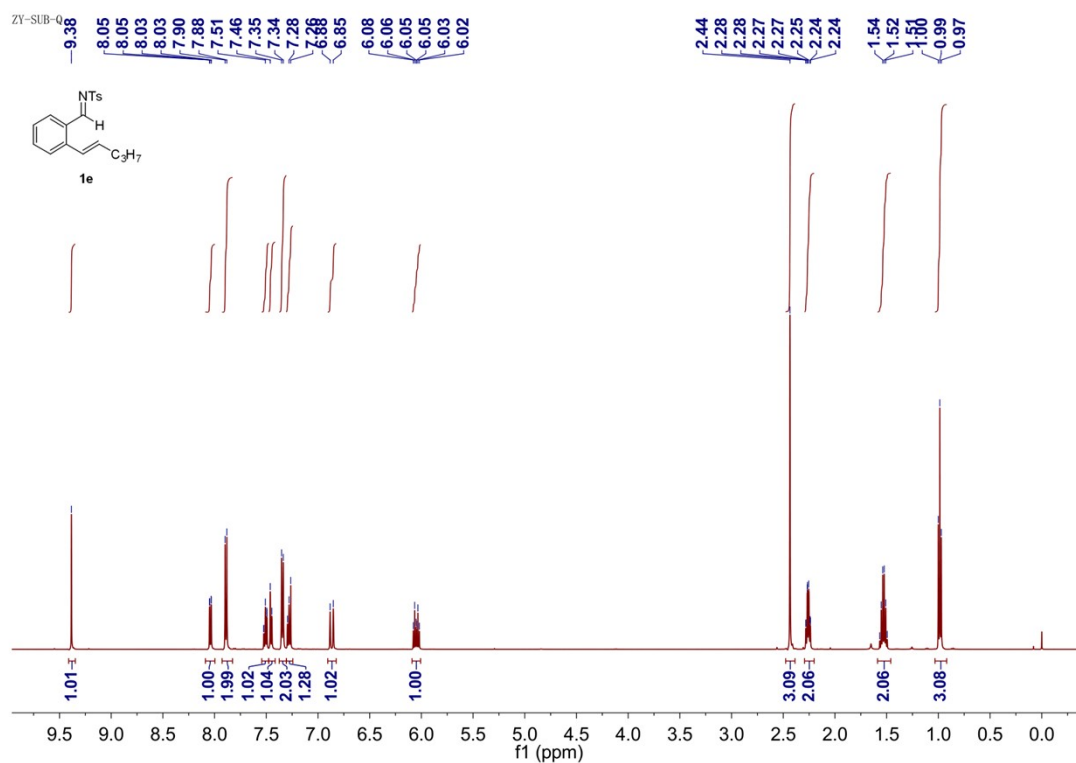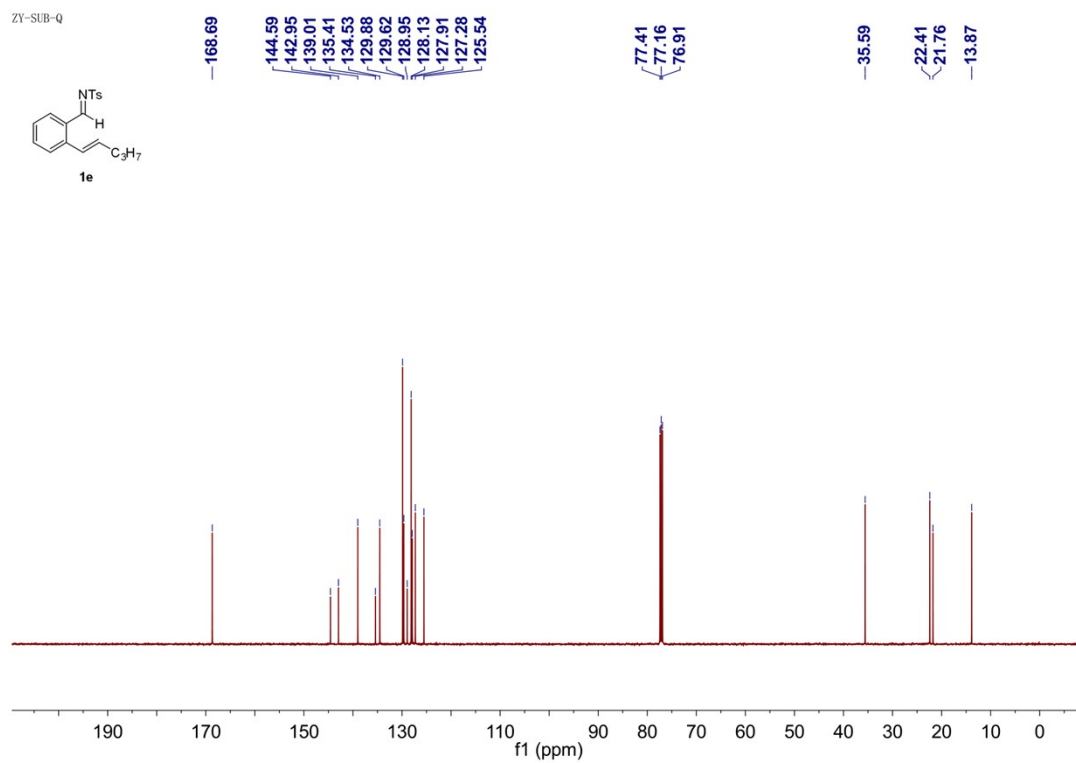

N-((E)-2-((E)-2-cyclopropylvinyl)benzylidene)-4-methylbenzenesulfonamide (**1f**)

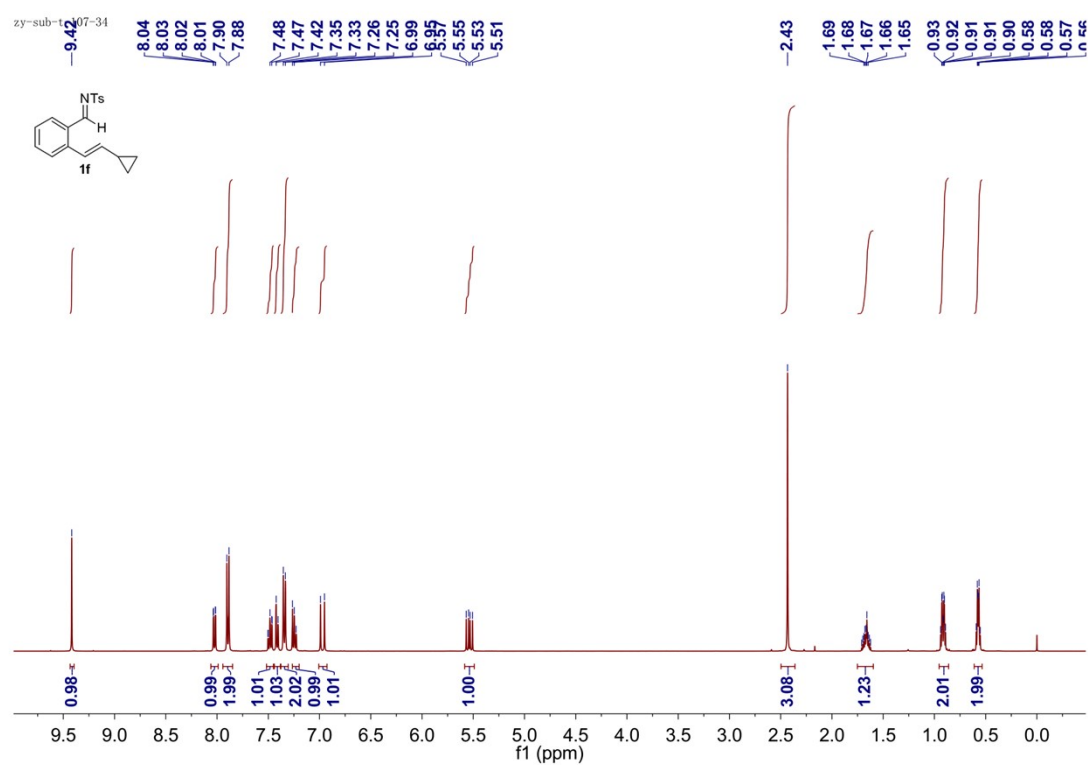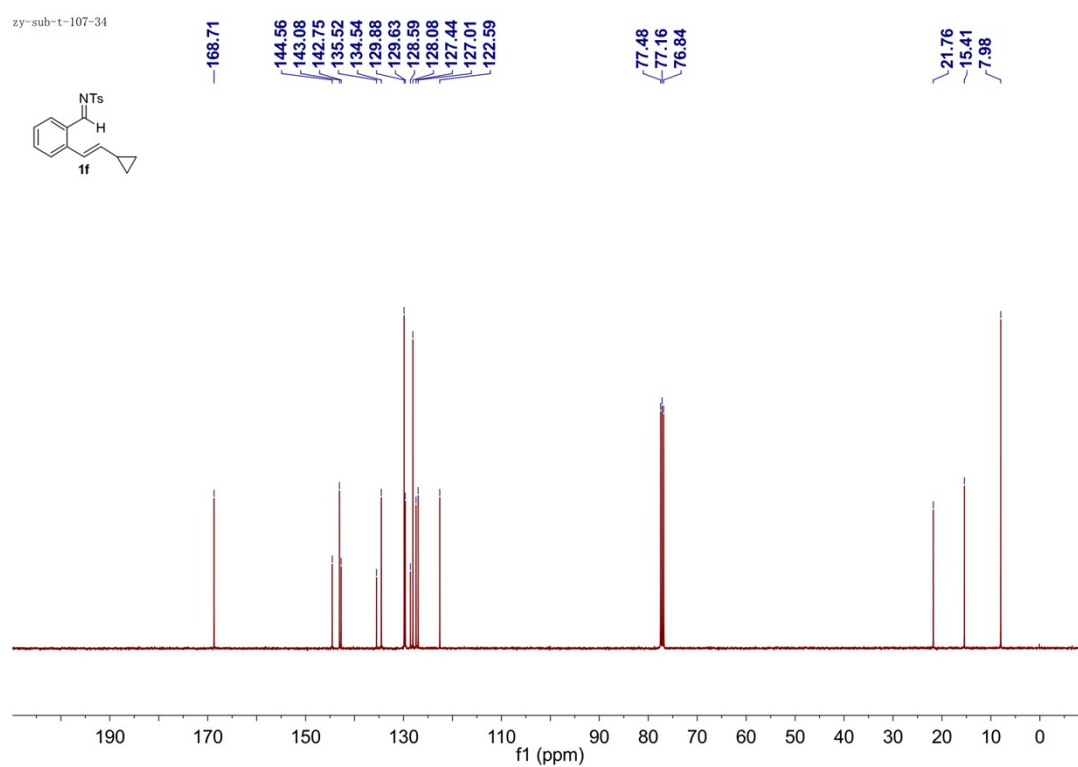

N-((E)-2-((E)-2-cyclohexylvinyl)benzylidene)-4-methylbenzenesulfonamide (**1g**)

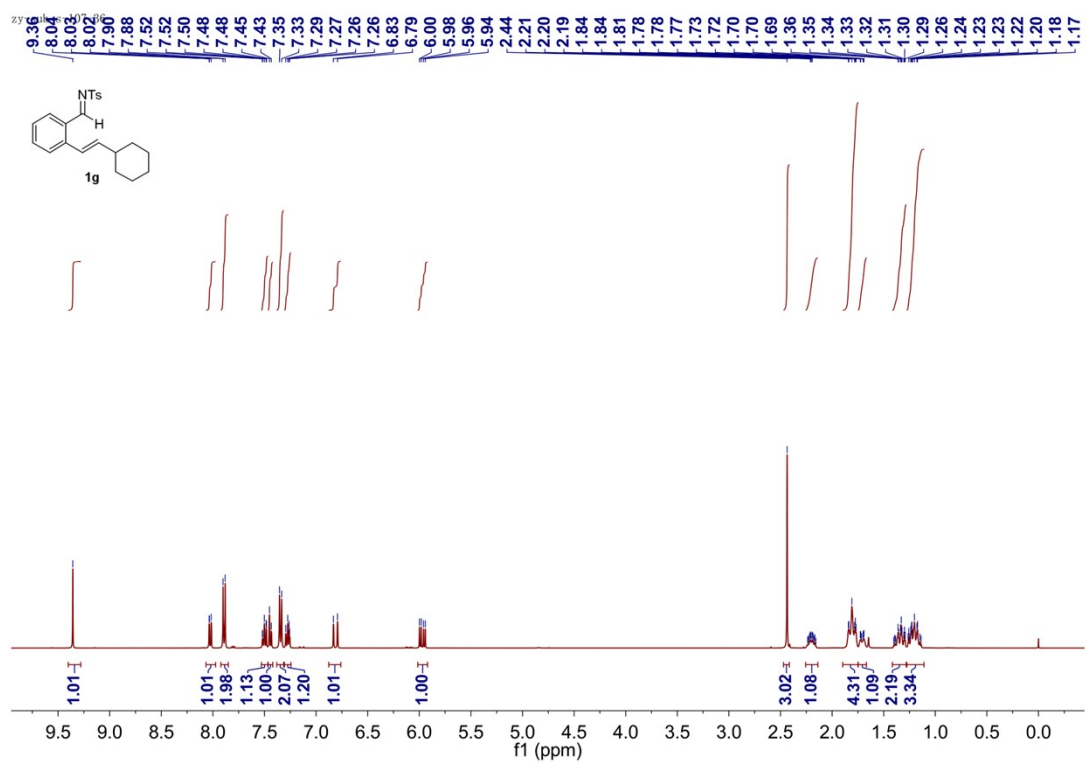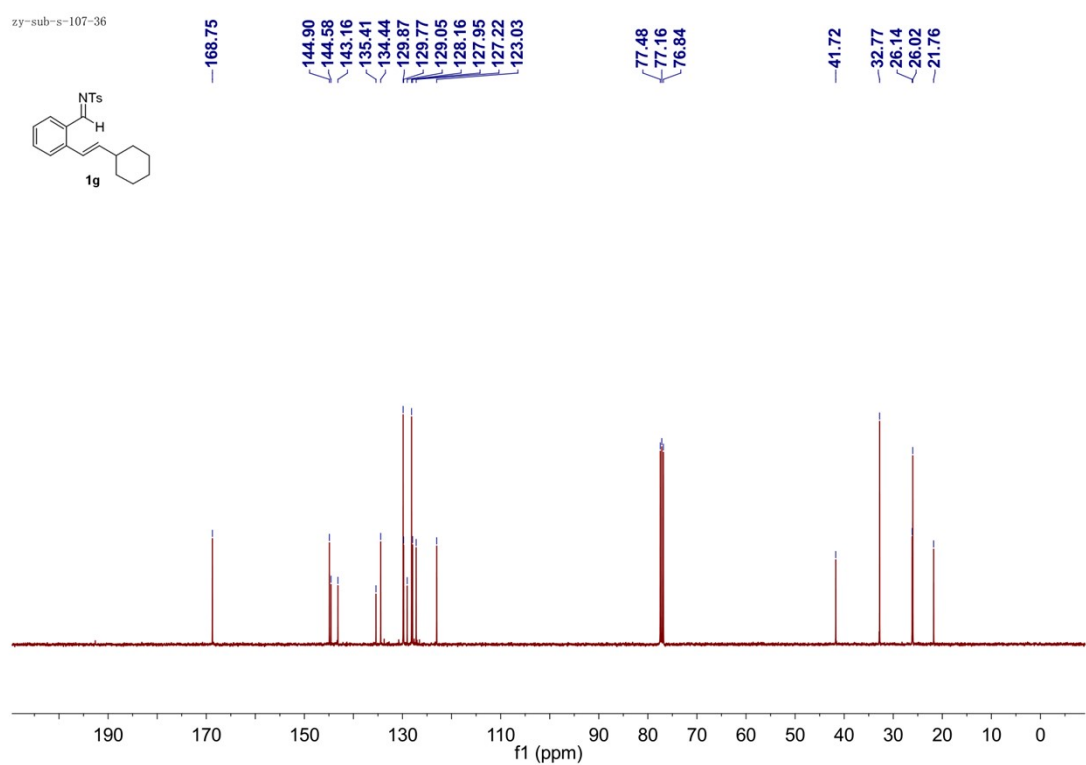

N-((E)-2-((E)-3,3-dimethylbut-1-en-1-yl)benzylidene)-4-methylbenzenesulfonamide (**1h**)

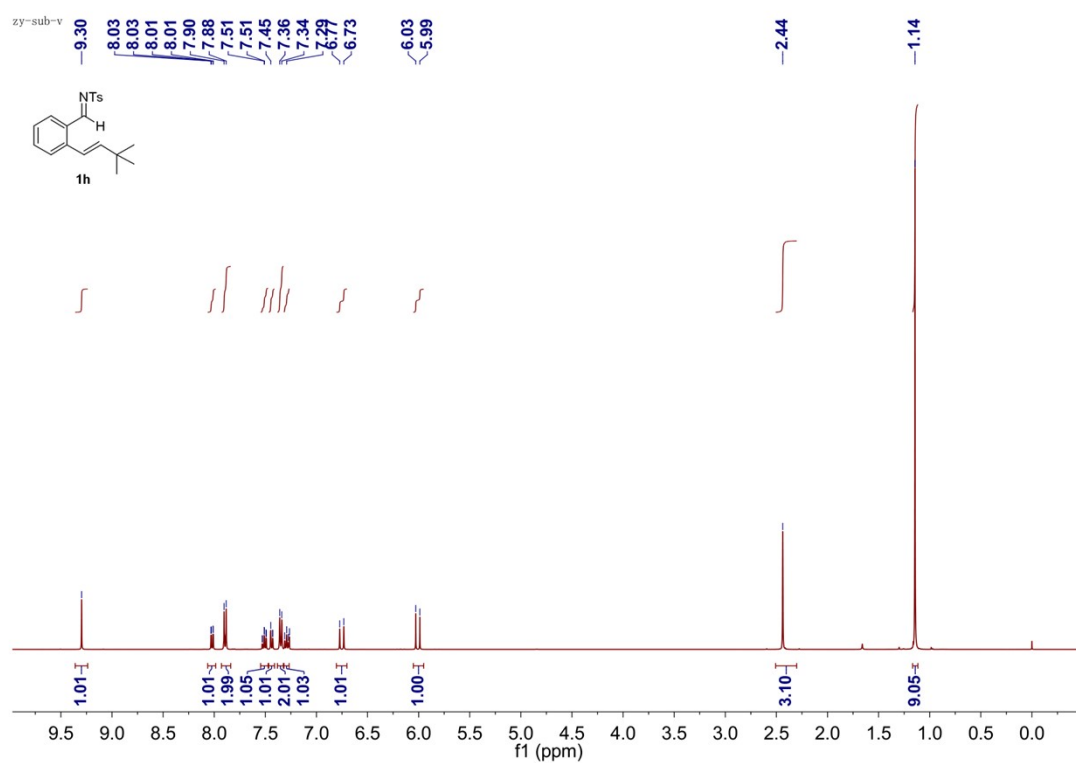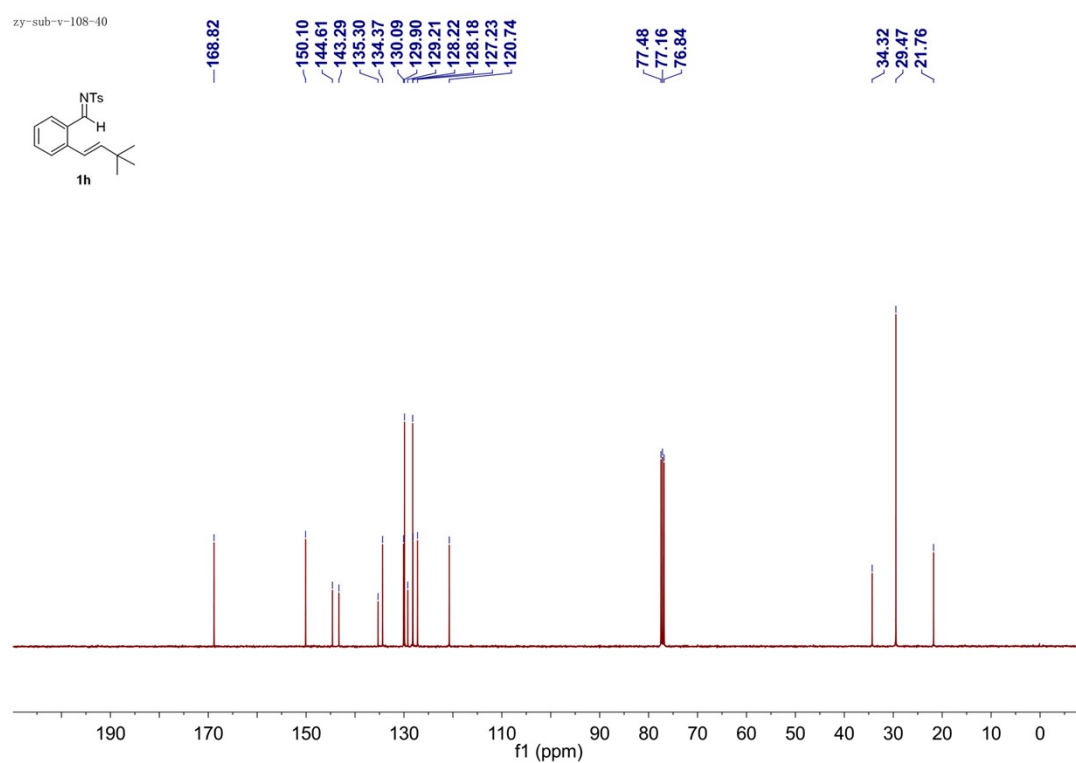

(E)-4-methyl-N-(2-(prop-1-en-2-yl)benzylidene)benzenesulfonamide (**1i**)

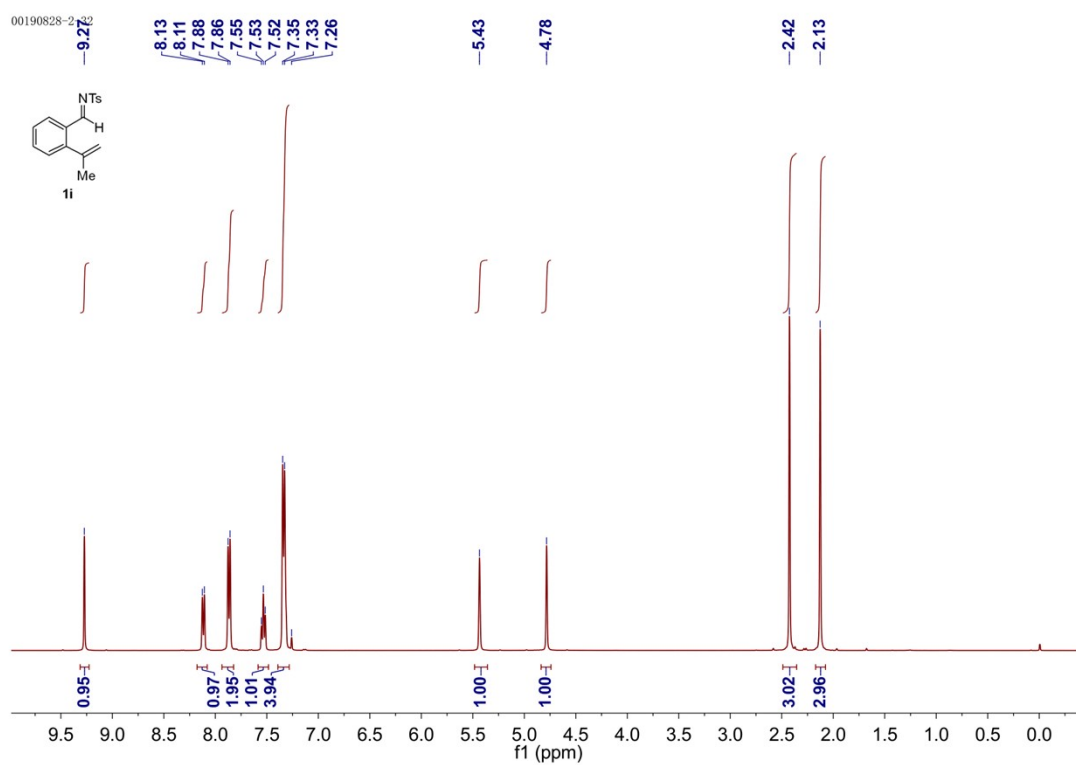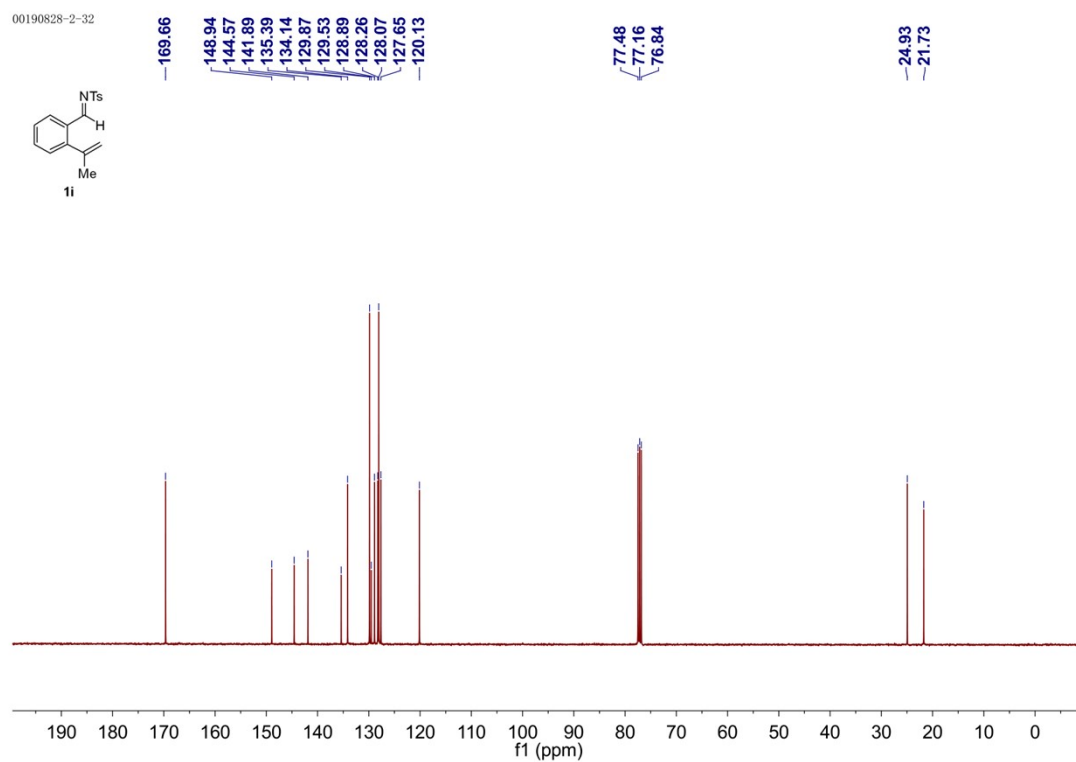

(E)-N-(2-(3,3-dimethylbut-1-en-2-yl)benzylidene)-4-methylbenzenesulfonamide (**1j**)

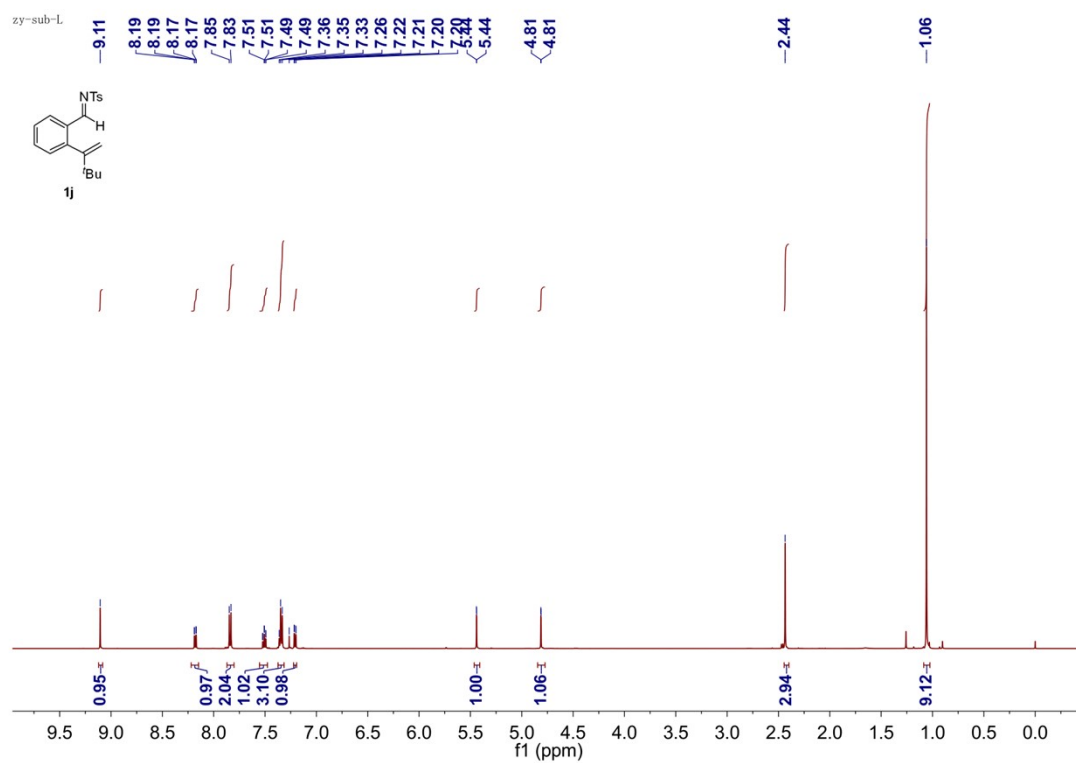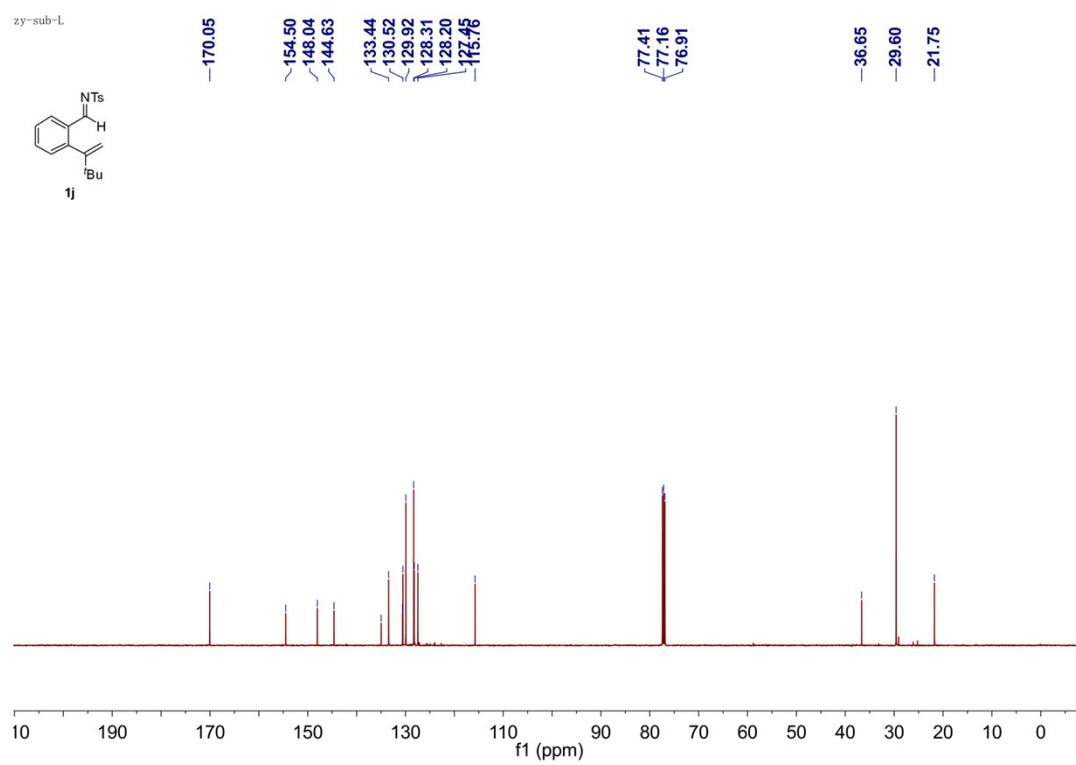



(E)-4-methyl-N-(2-(1-phenylvinyl)benzylidene)benzenesulfonamide (**1k**)

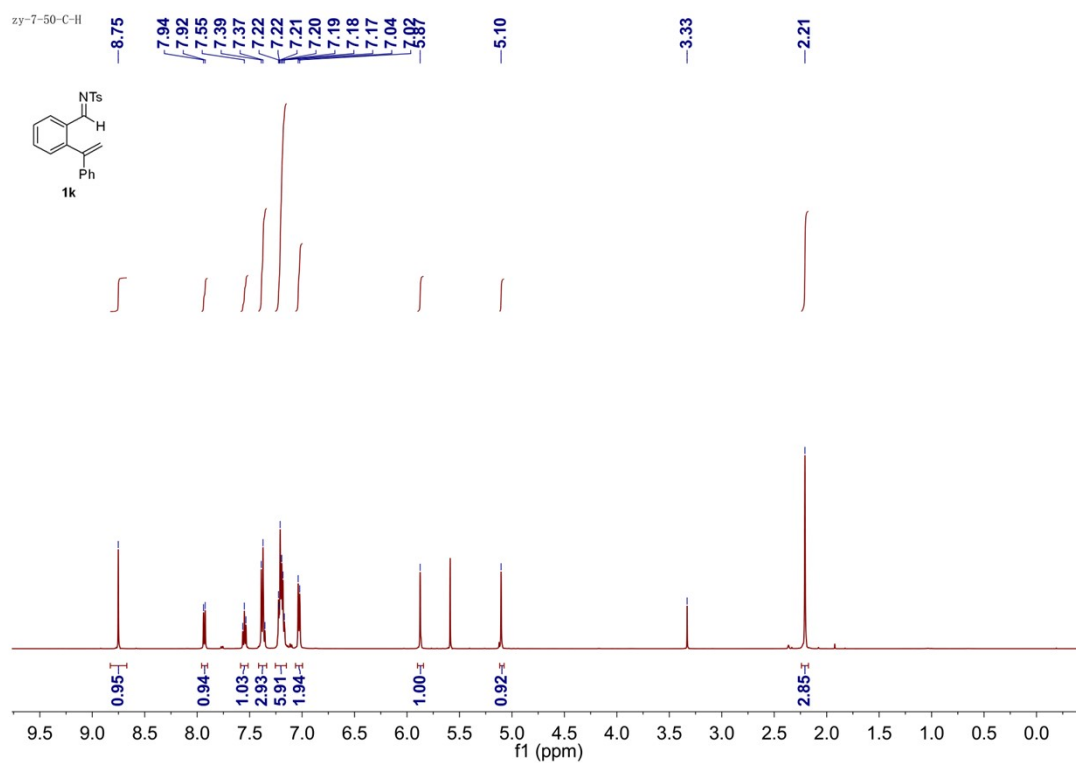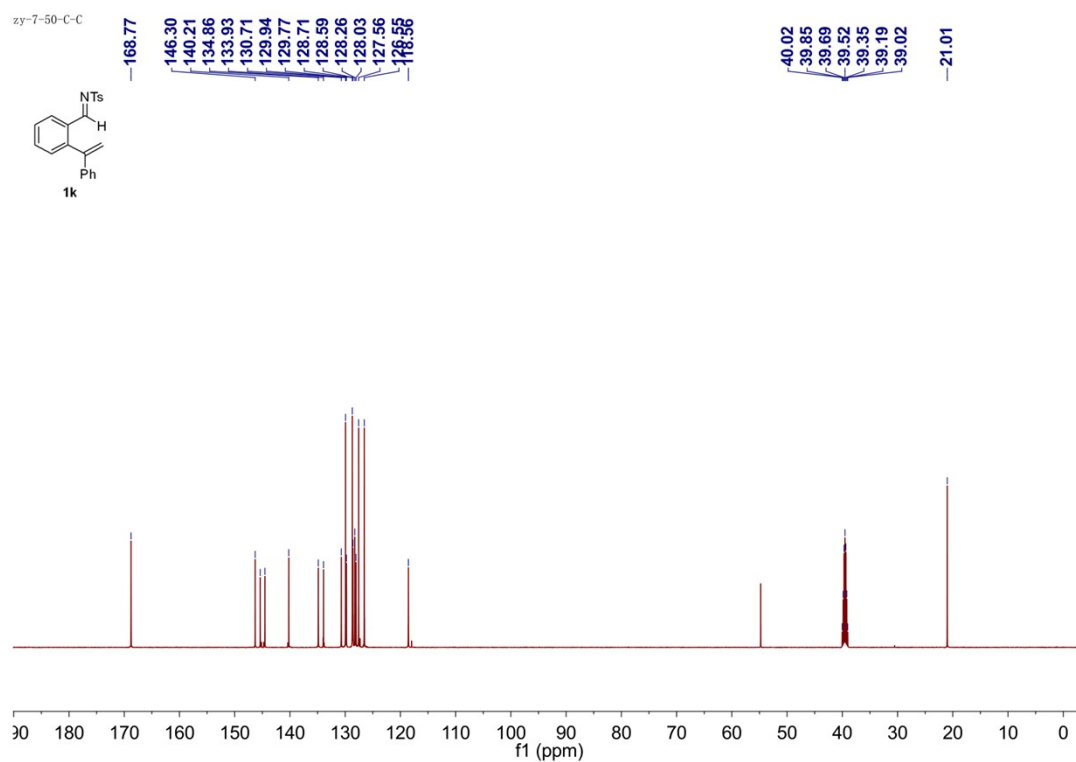

(E)-N-(2-(1-(3,4-dichlorophenyl)vinyl)benzylidene)-4-methylbenzenesulfonamide (**11**)

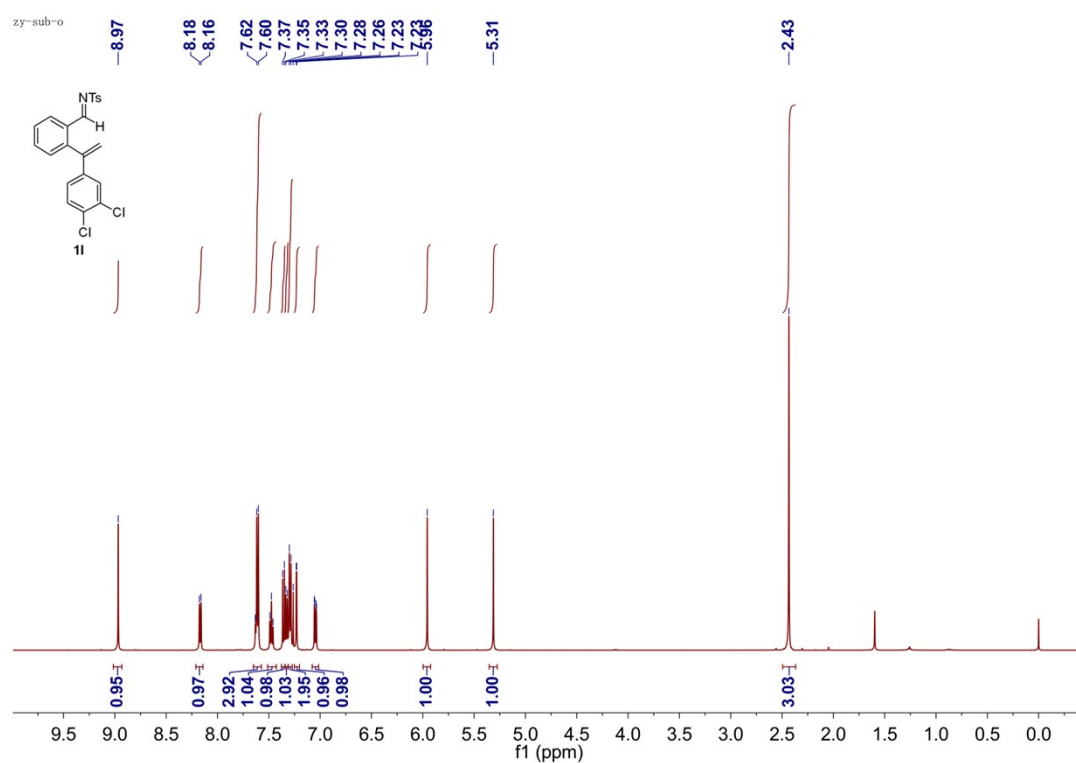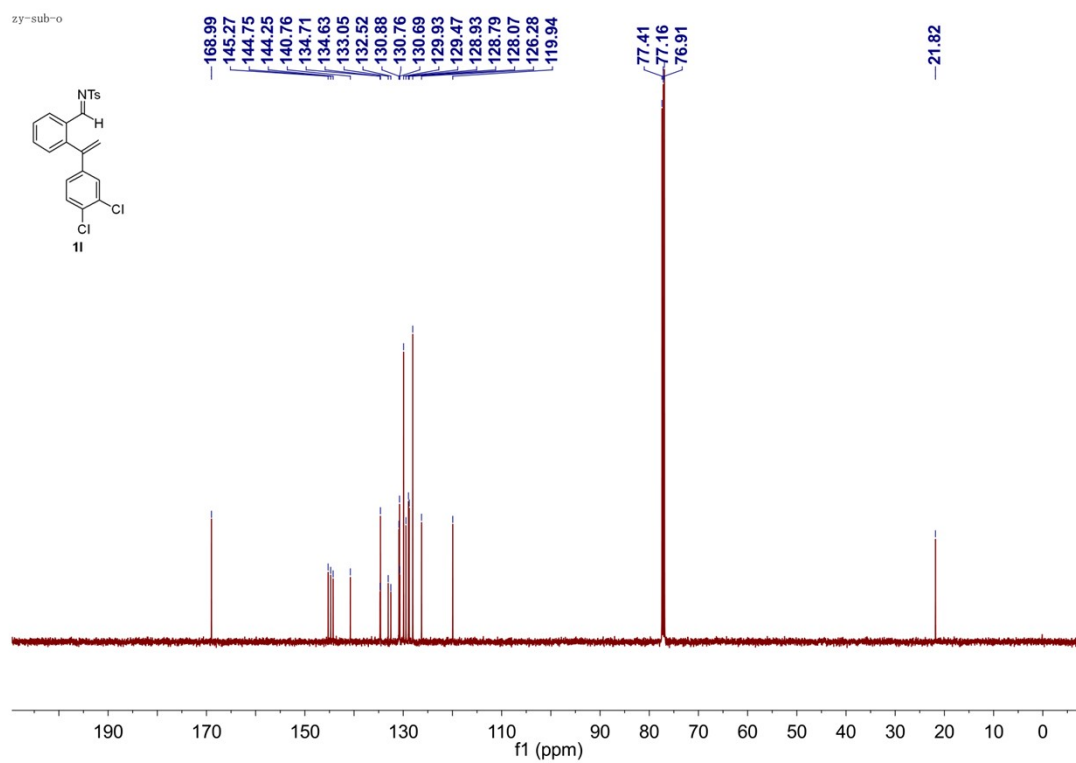

(E)-4-methyl-N-(2-(1-(naphthalen-1-yl)vinyl)benzylidene)benzenesulfonamide (**1m**)

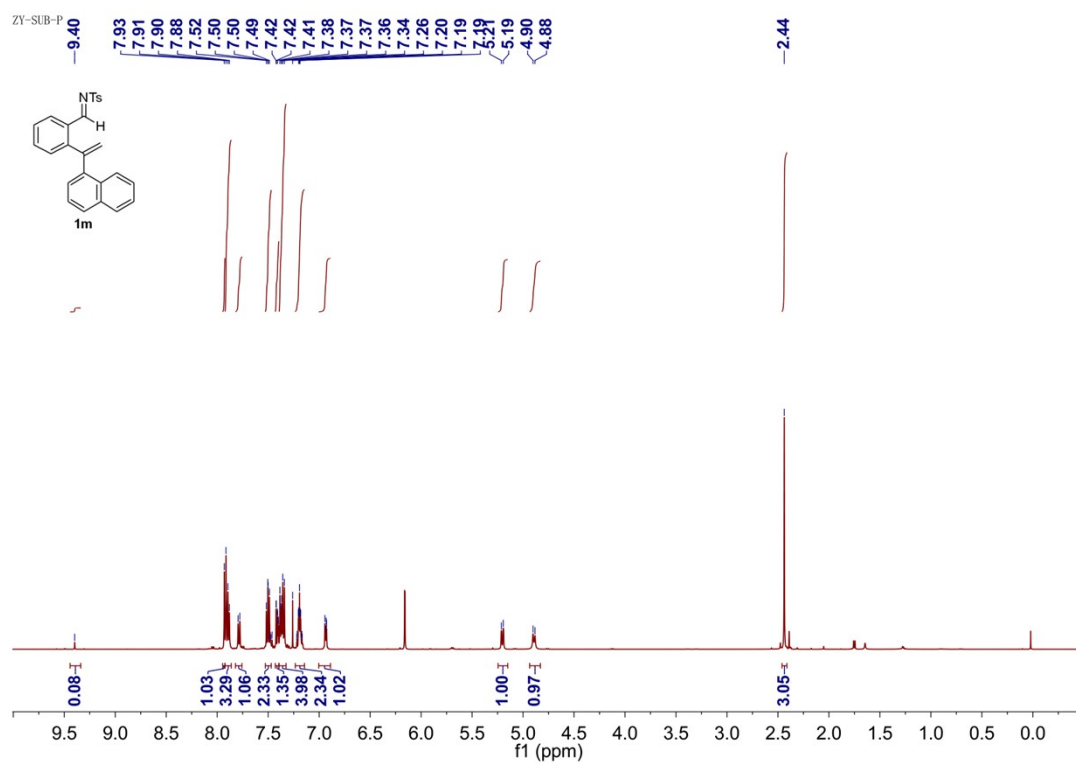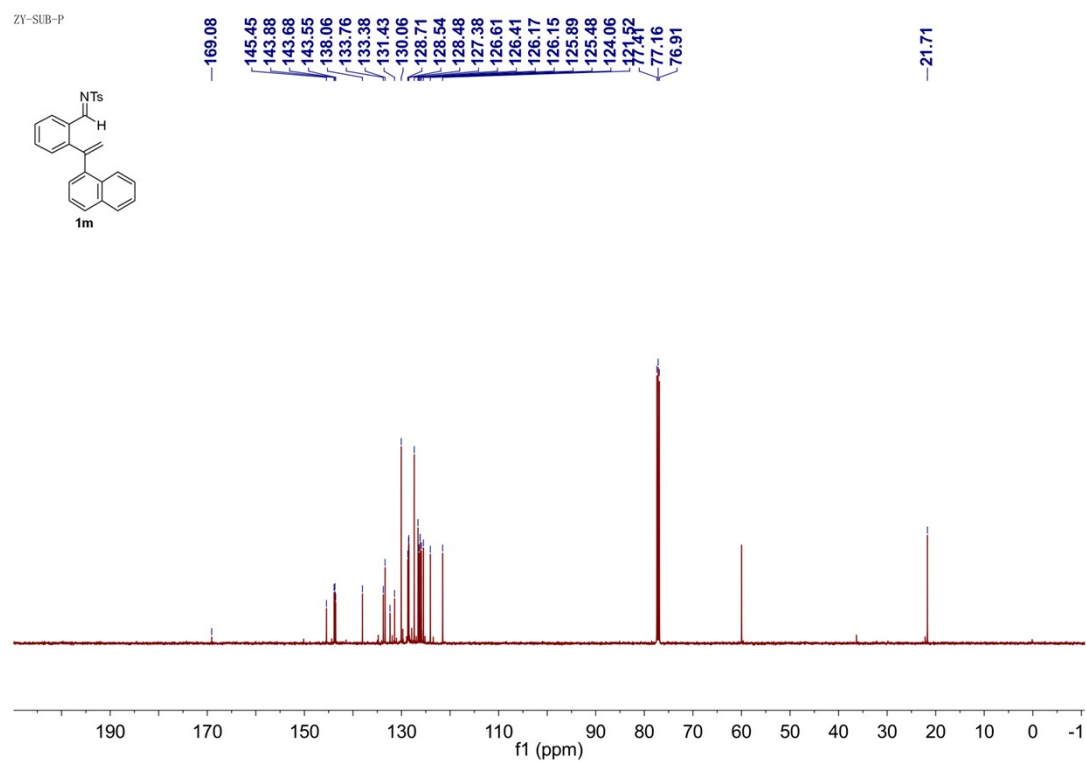

N-((E)-2-((E)-but-2-en-2-yl)benzylidene)-4-methylbenzenesulfonamide (**1n**)

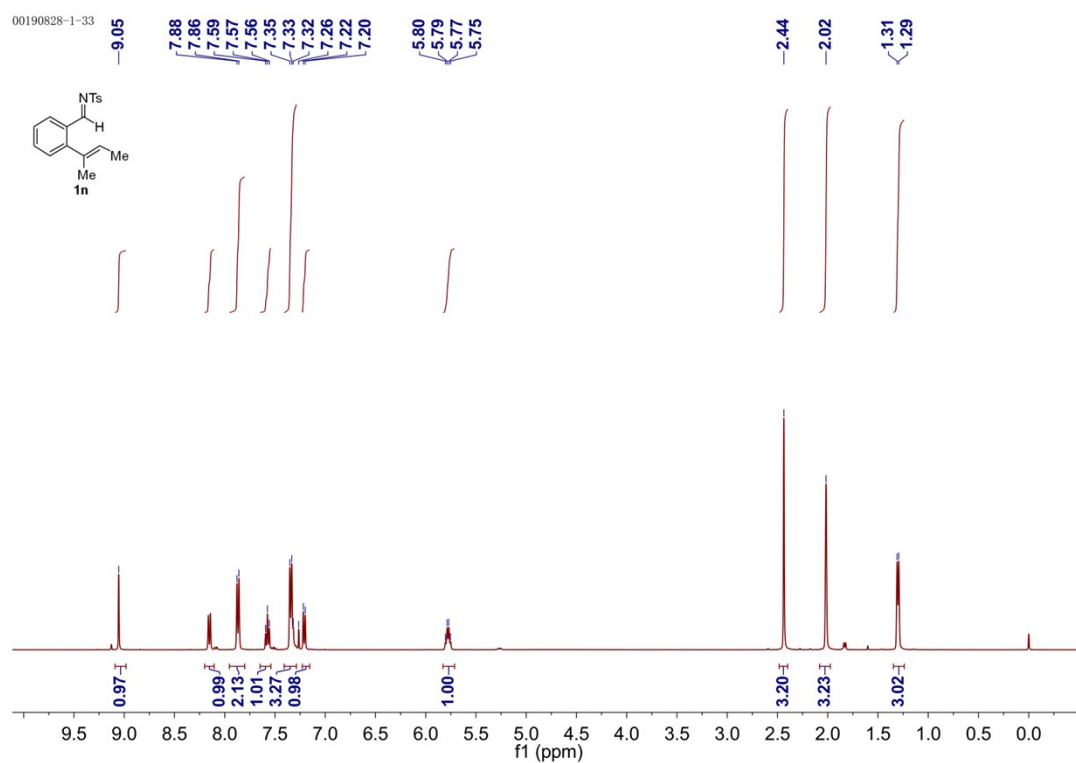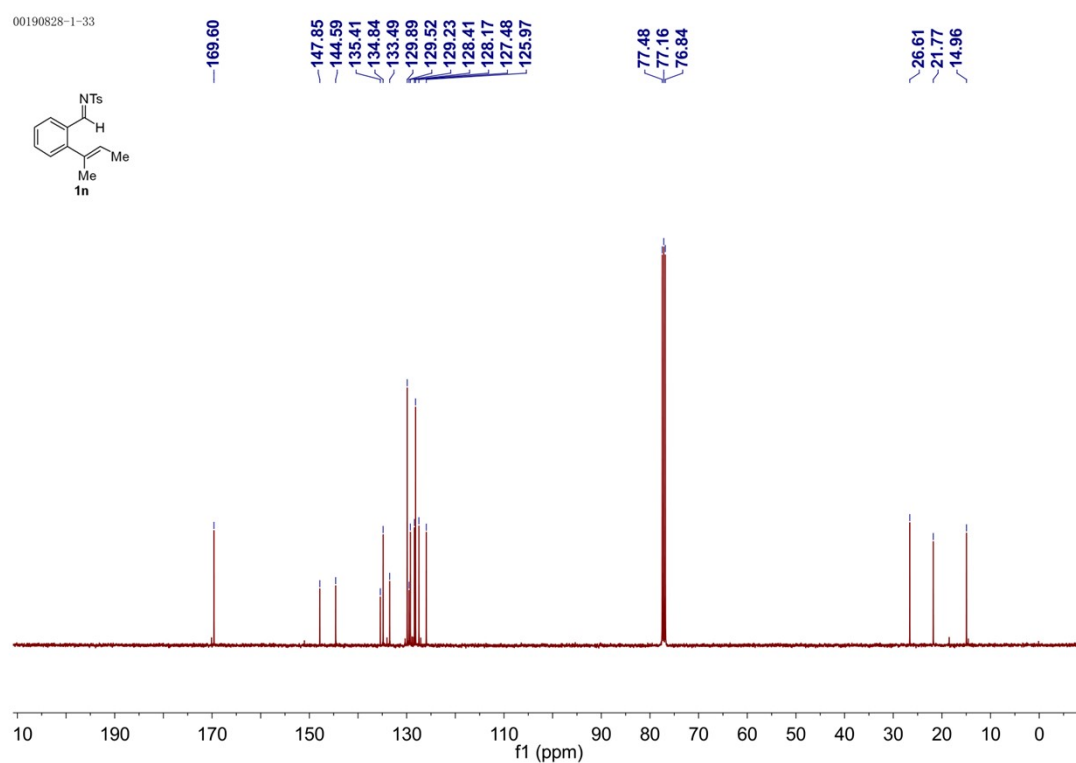

(E)-N-(2-(cyclopent-1-en-1-yl)benzylidene)-4-methylbenzenesulfonamide (**1o**)

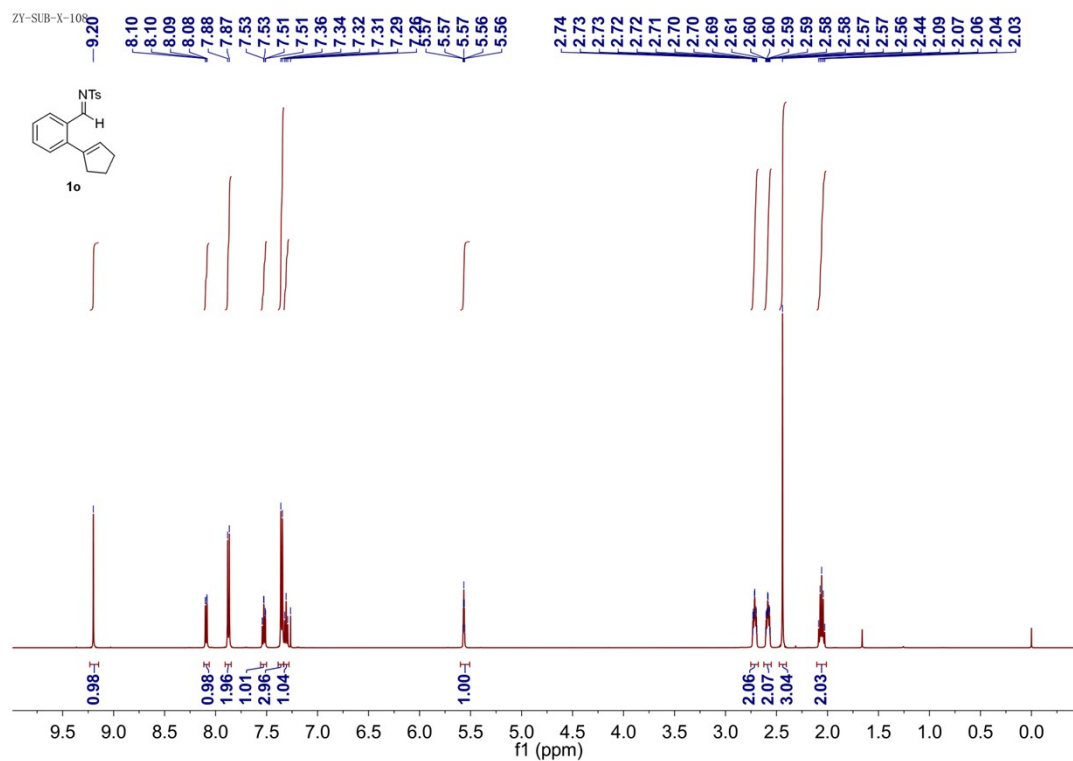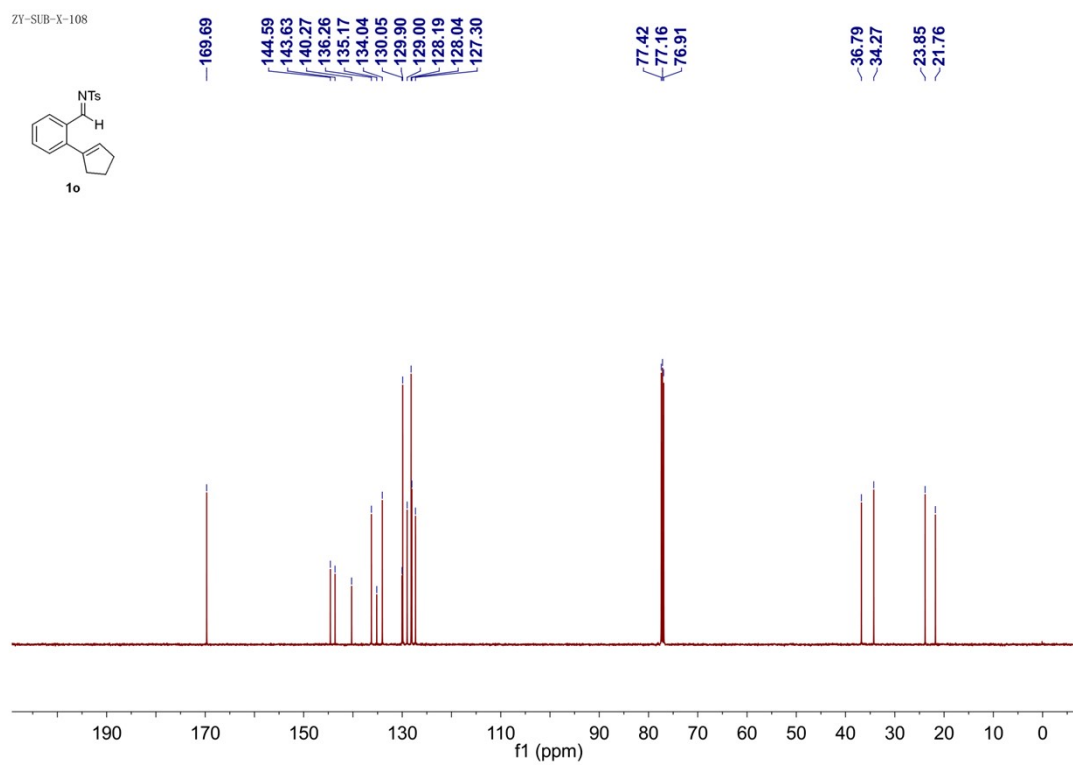

(E)-4-methyl-N-((2',3',4',5'-tetrahydro-[1,1'-biphenyl]-2-yl)methylene)benzenesulfonamide (**1p**)

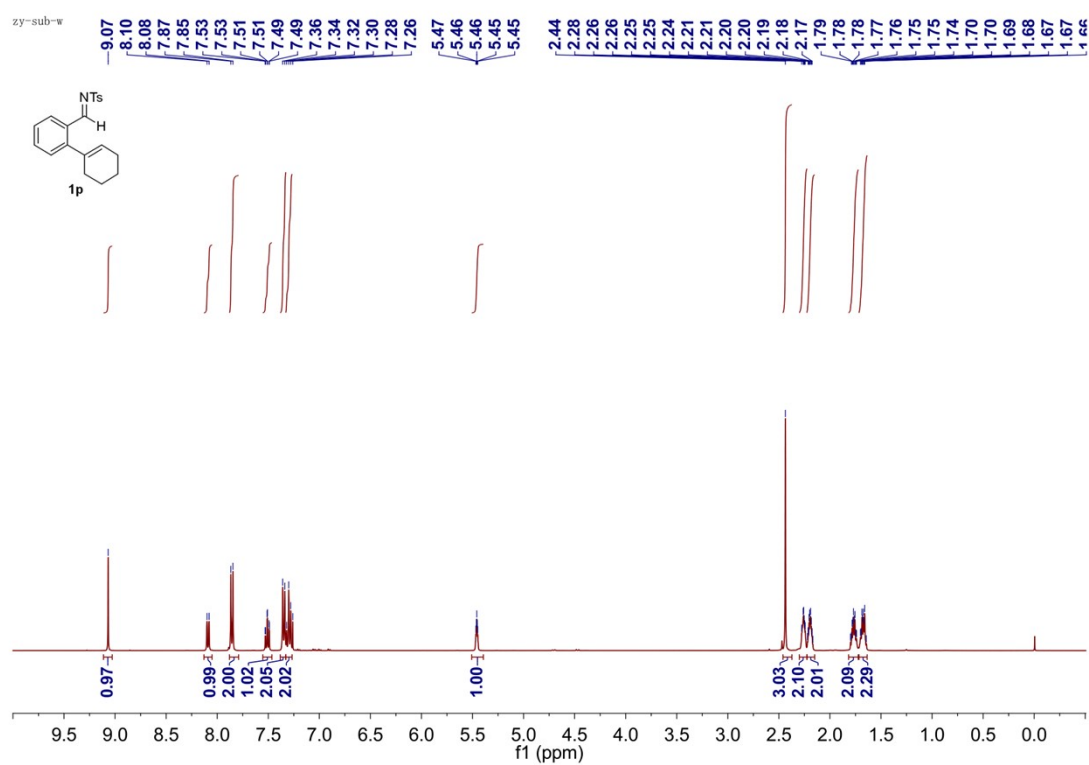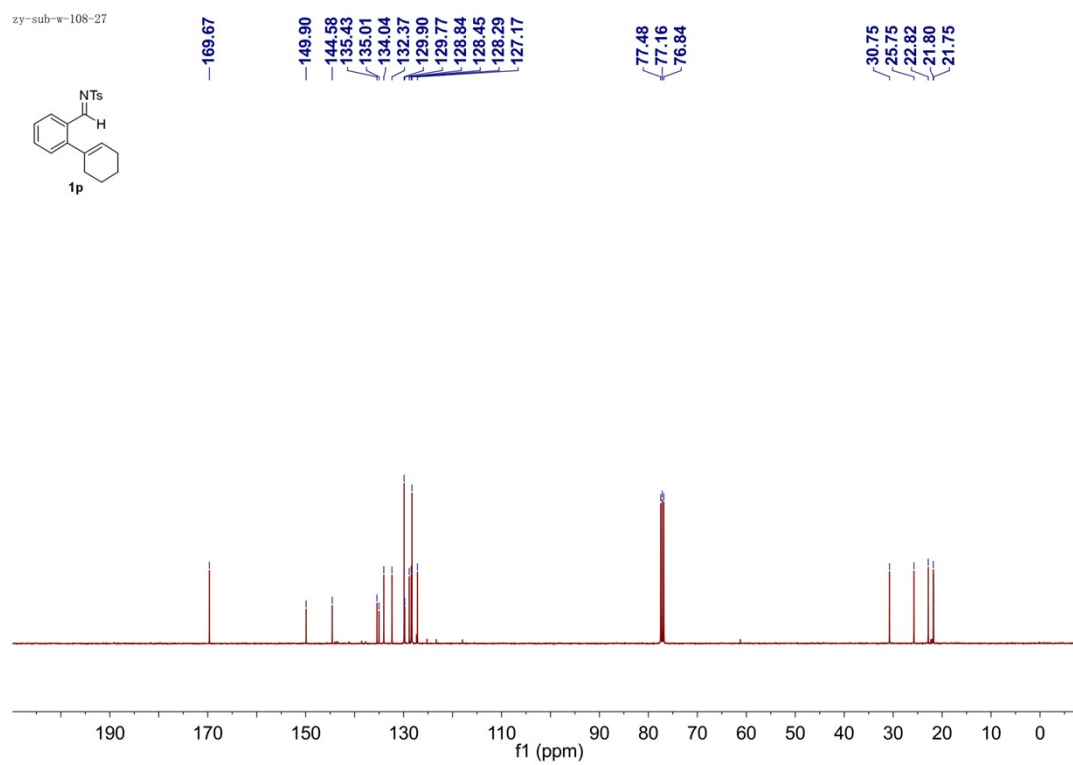

4-methyl-N-((E)-2-methyl-6-((E)-prop-1-en-1-yl)benzylidene)benzenesulfonamide (**1q**)

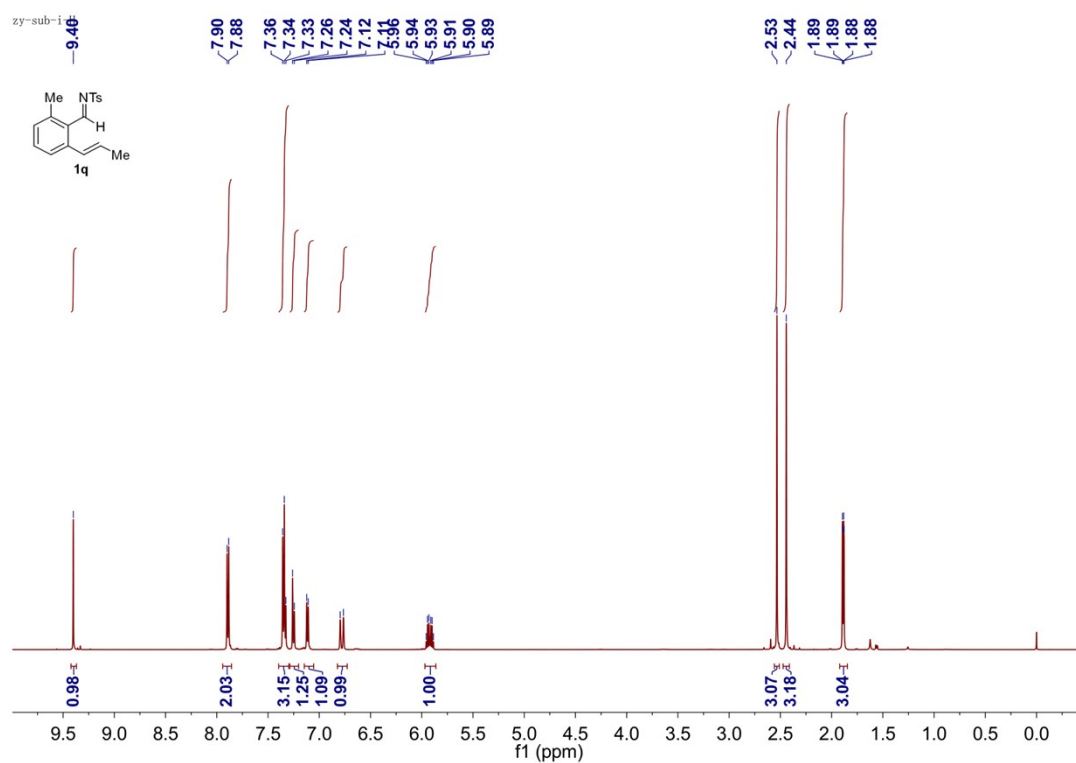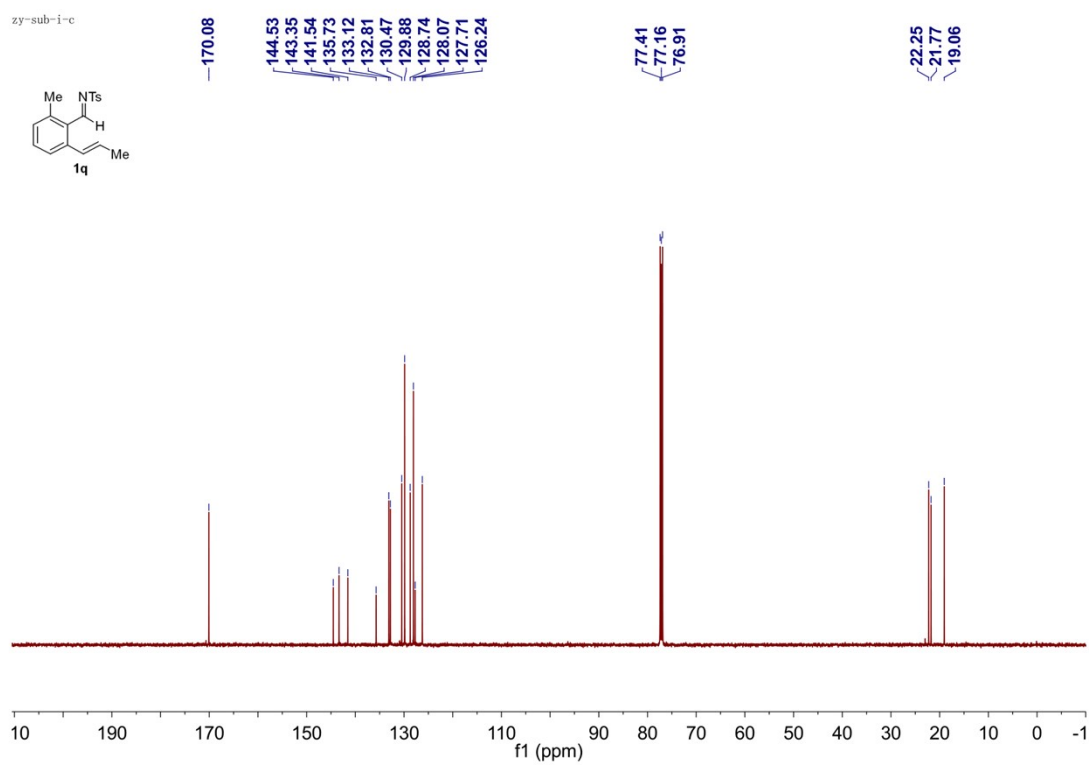

4-methyl-N-((E)-4-methyl-2-((E)-prop-1-en-1-yl)benzylidene)benzenesulfonamide (**1r**)

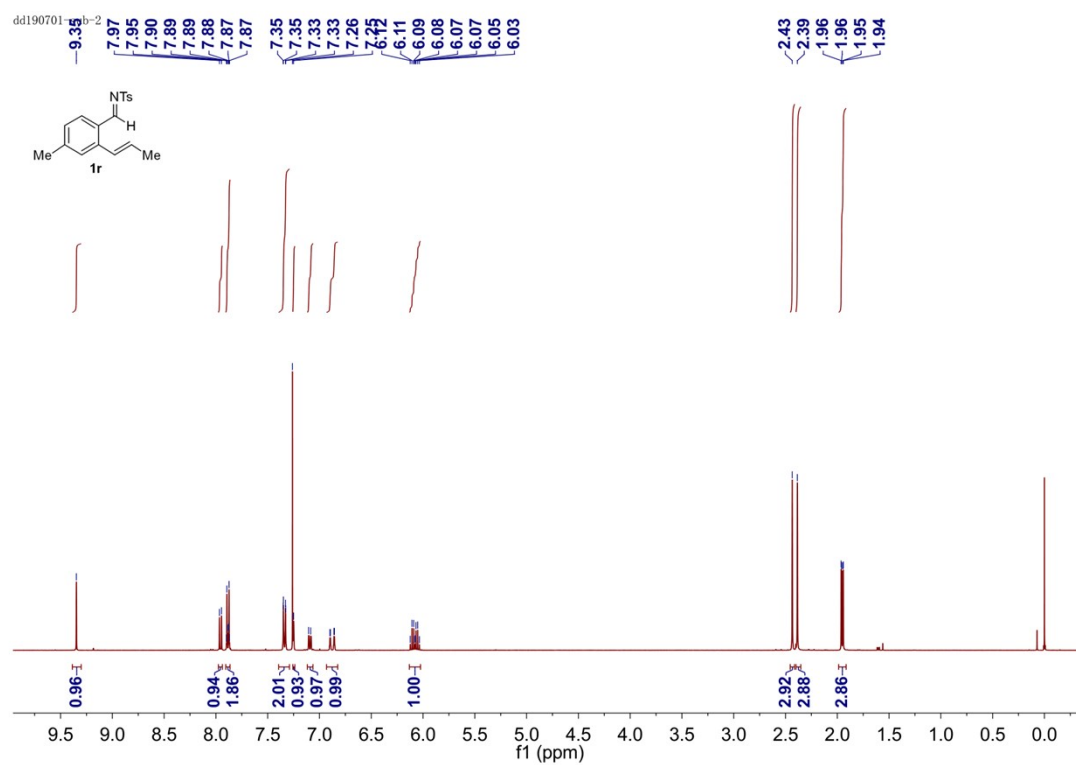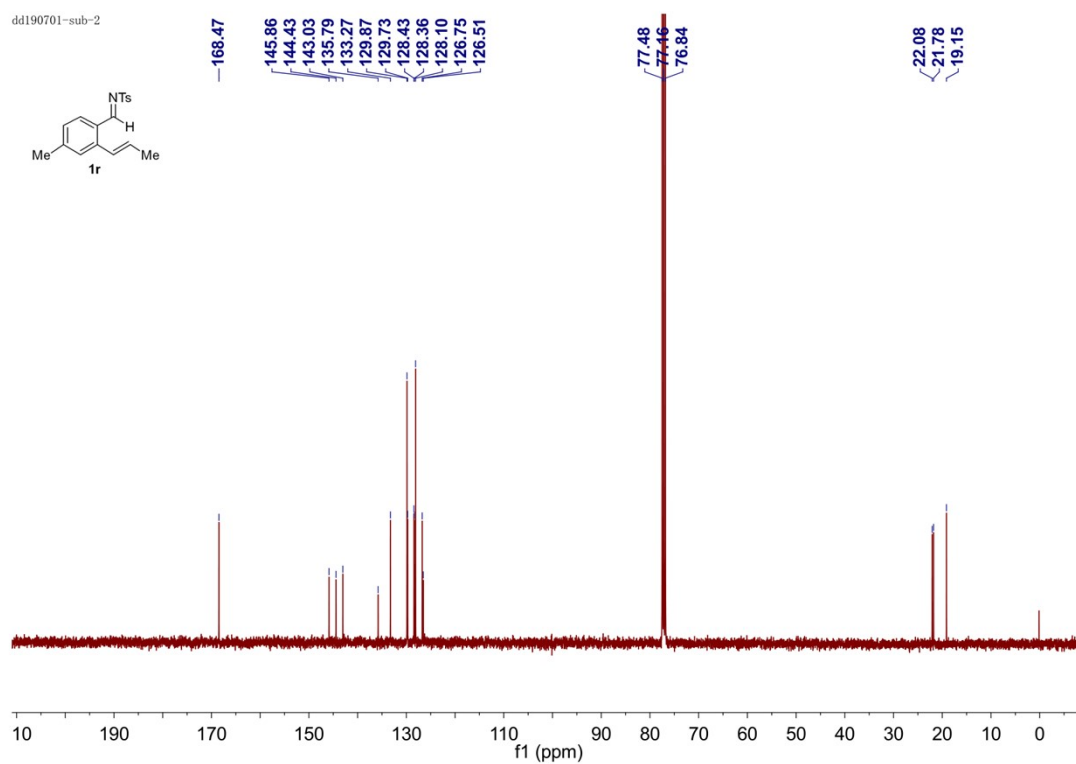



4-methyl-N-((E)-3-methyl-2-((E)-prop-1-en-1-yl)benzylidene)benzenesulfonamide

(1s)

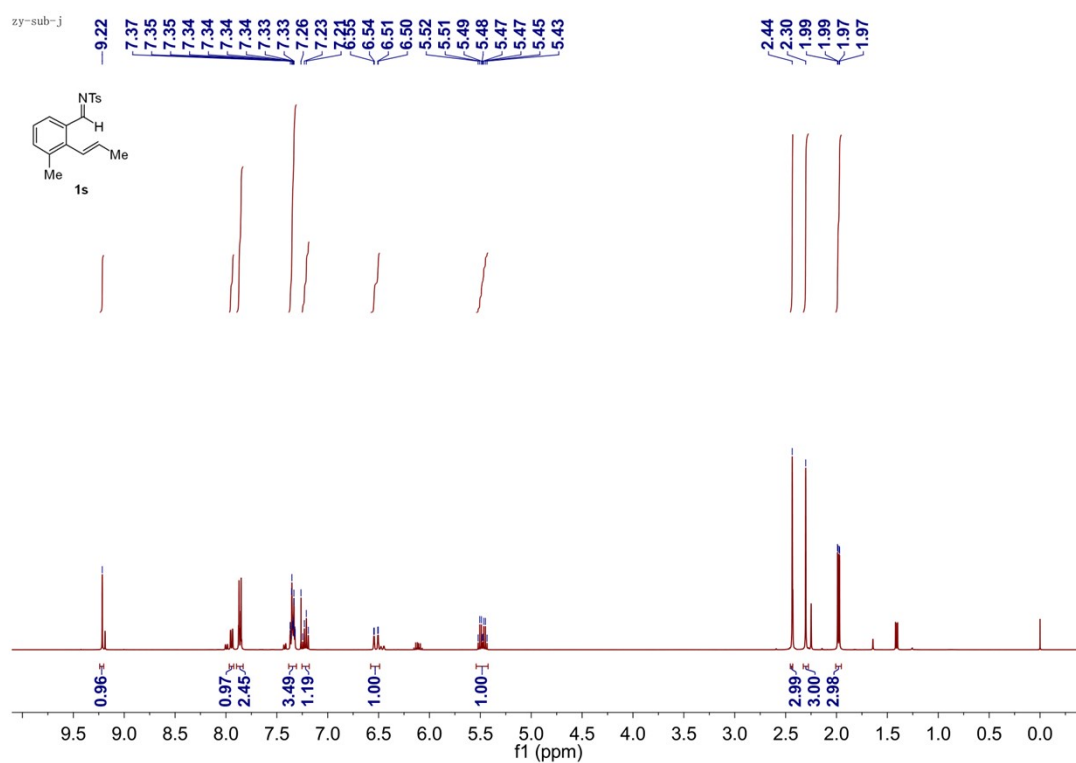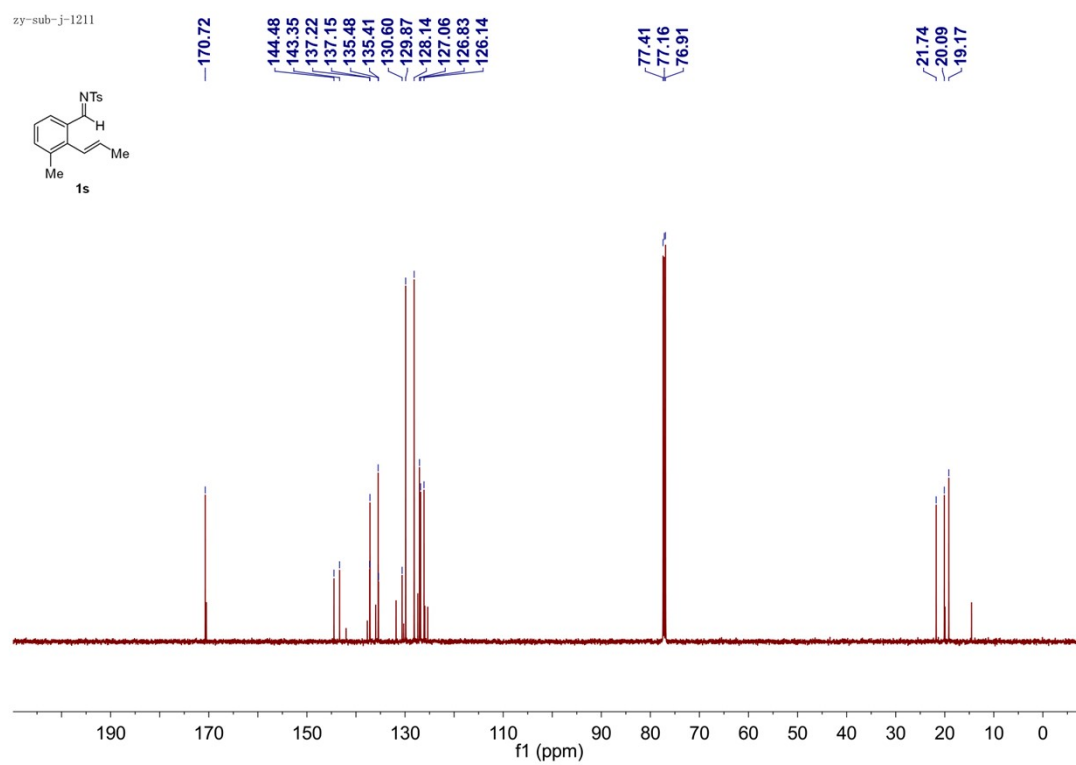

N-((E)-4-fluoro-2-((E)-prop-1-en-1-yl)benzylidene)-4-methylbenzenesulfonamide (**1t**)

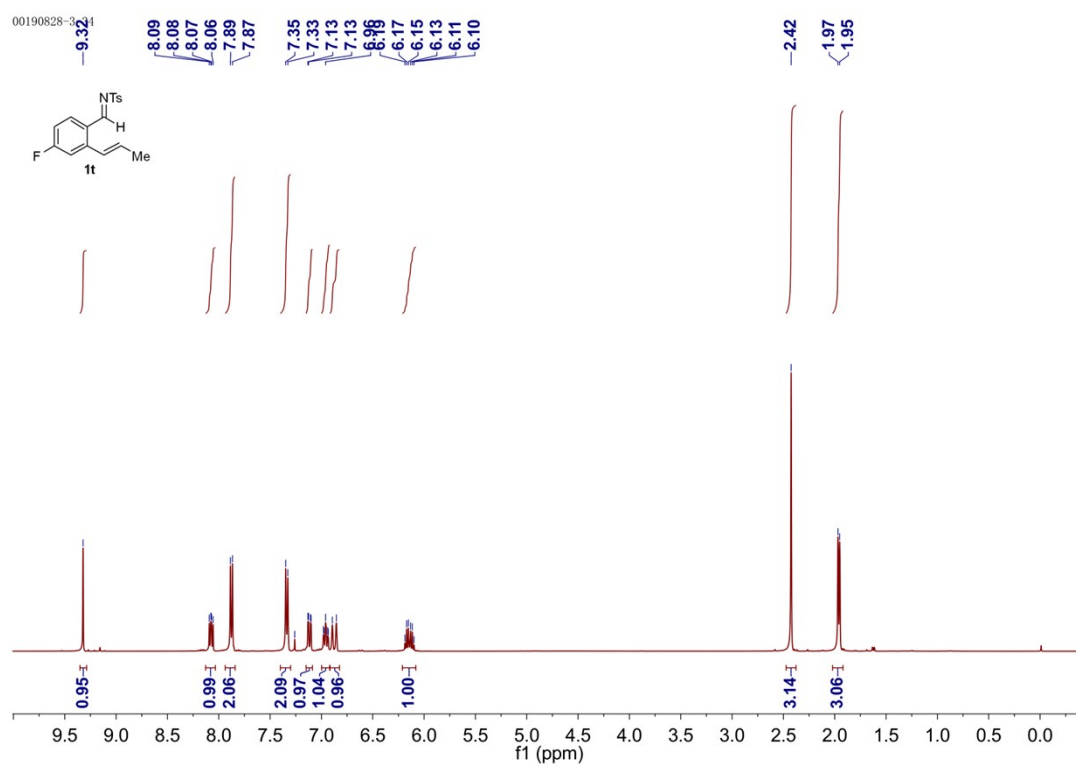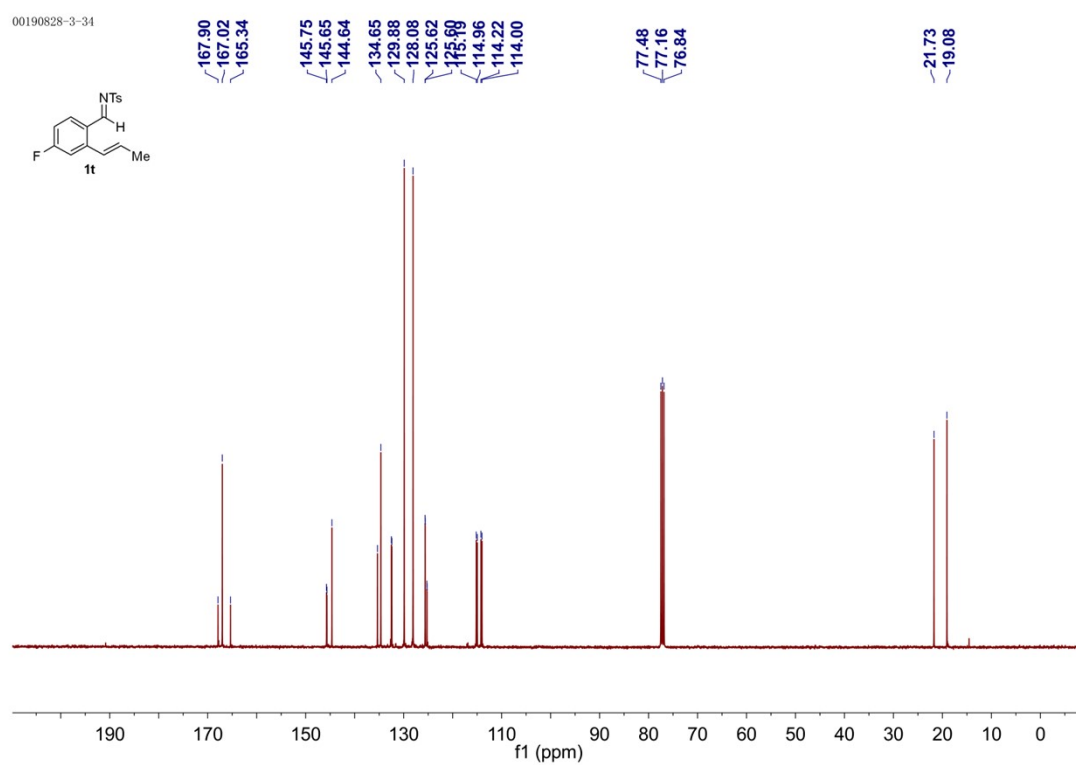

N-((E)-4-methoxy-2-((E)-prop-1-en-1-yl)benzylidene)-4-methylbenzenesulfonamide (**1t**)

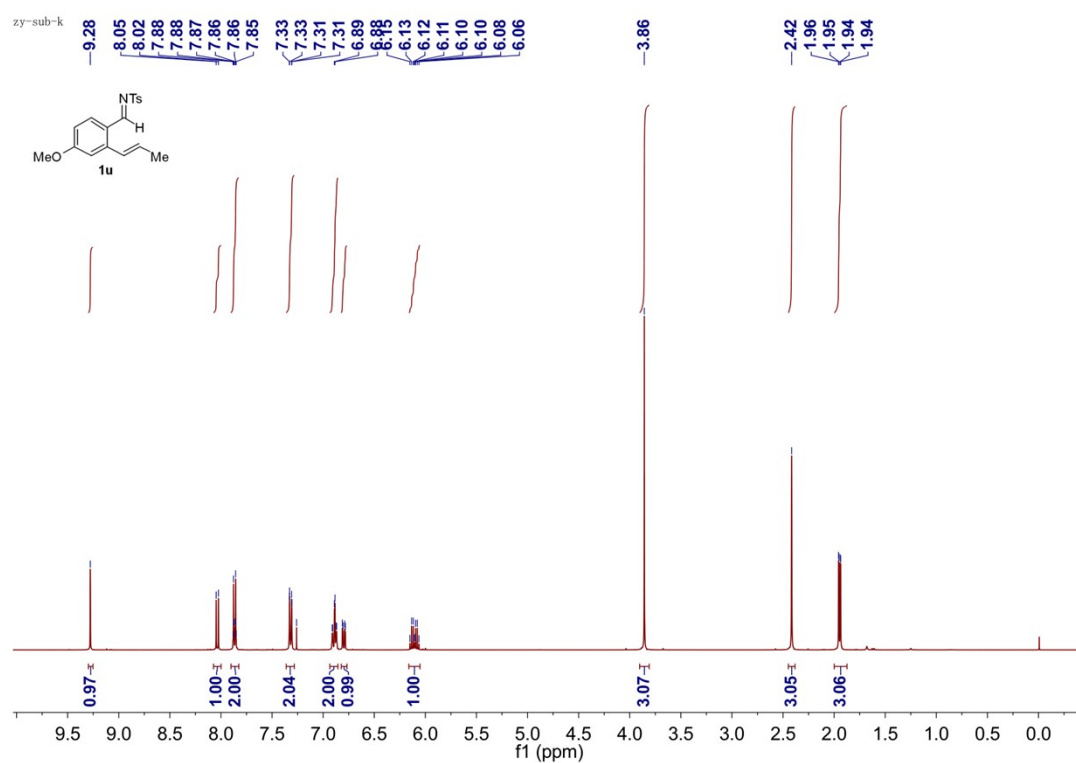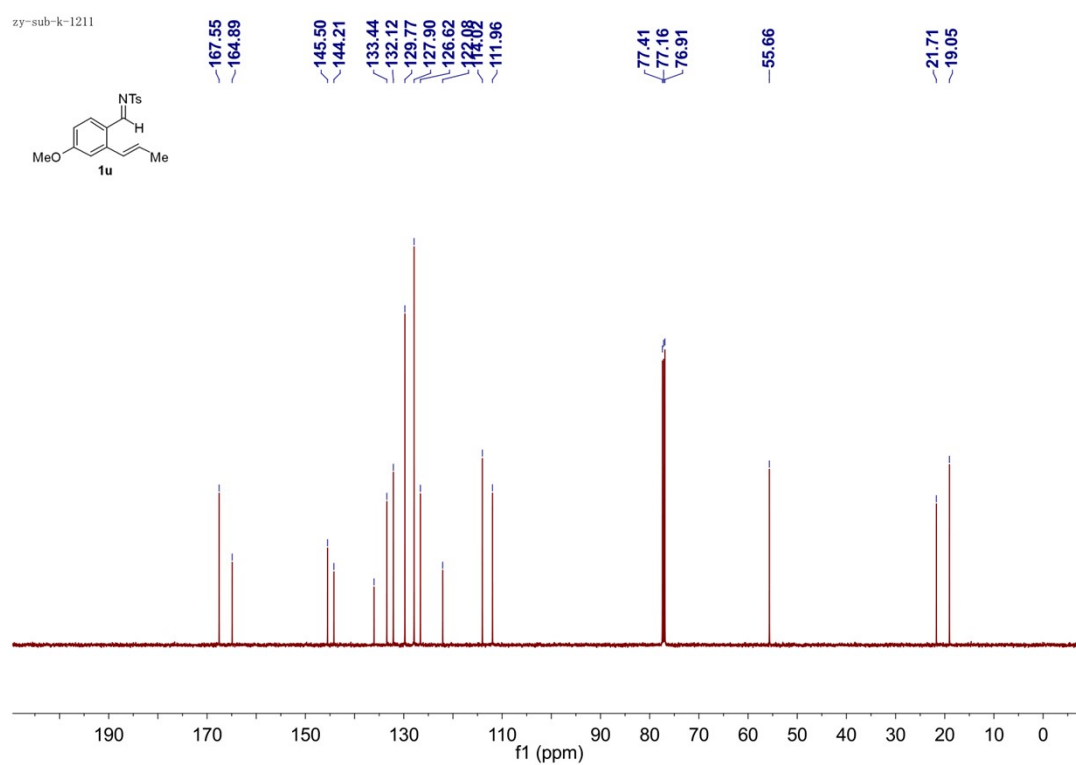

N-((E)-4-chloro-2-((E)-prop-1-en-1-yl)benzylidene)-4-methylbenzenesulfonamide

(1v)

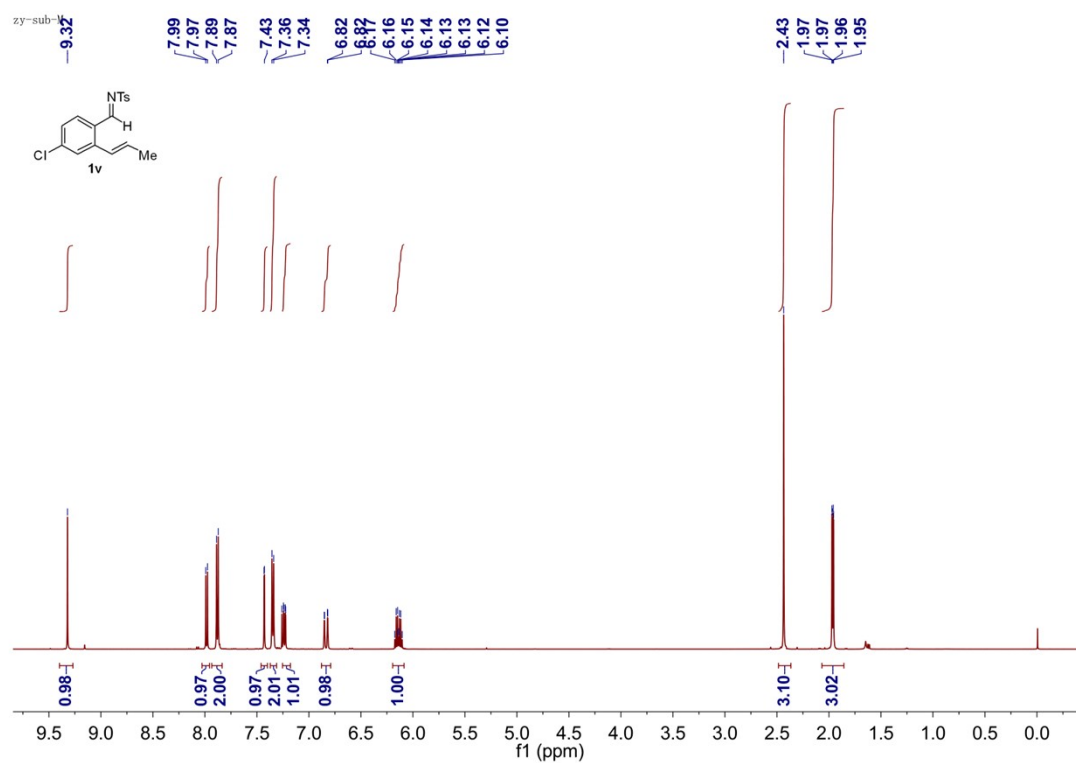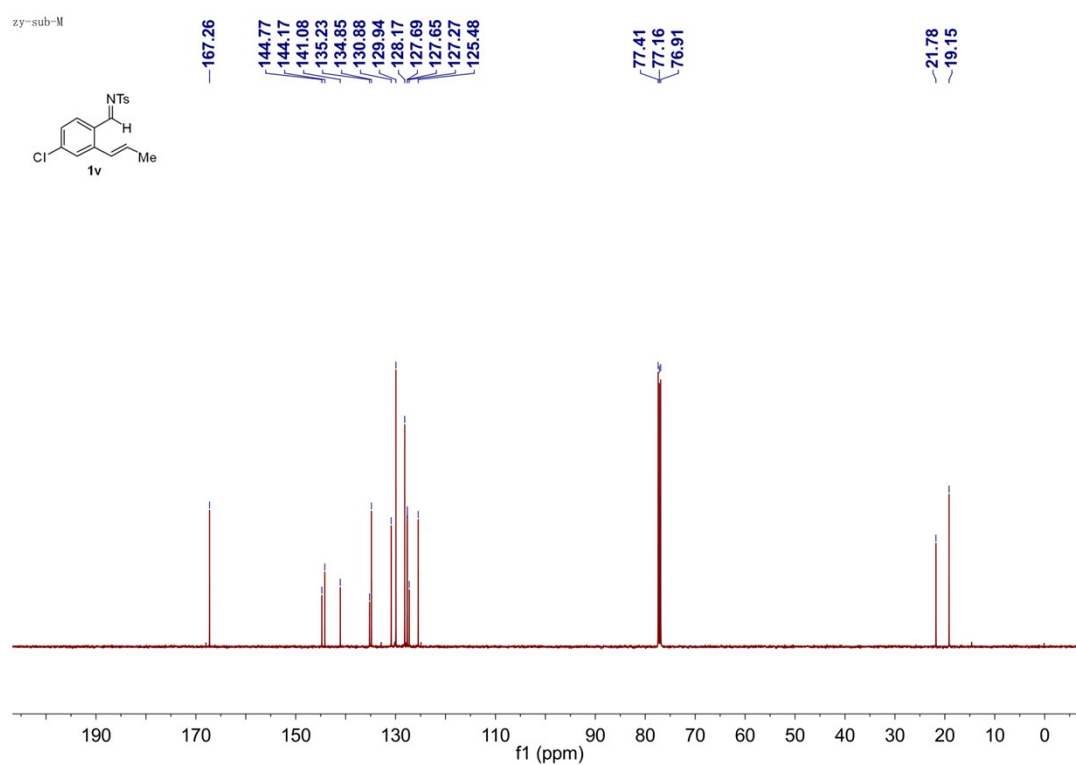

4-methyl-N-((E)-(6-((E)-prop-1-en-1-yl)benzo[d][1,3]dioxol-5-yl)methylene)benzenesulfonamide  
(**1w**)

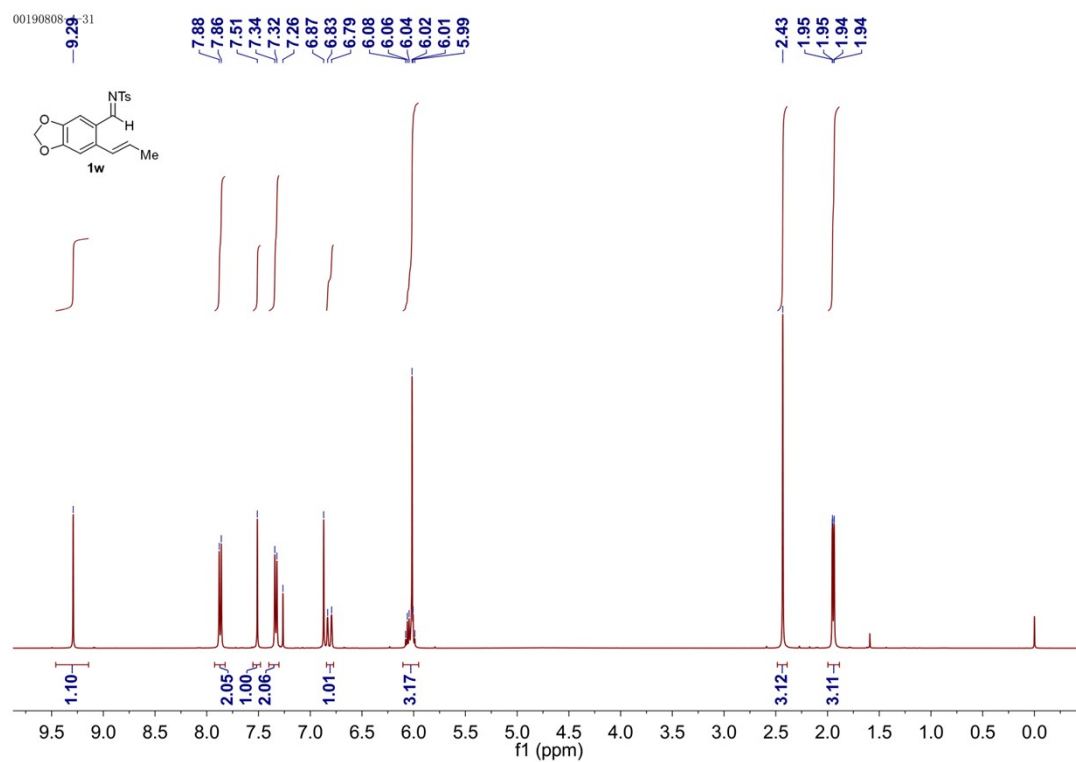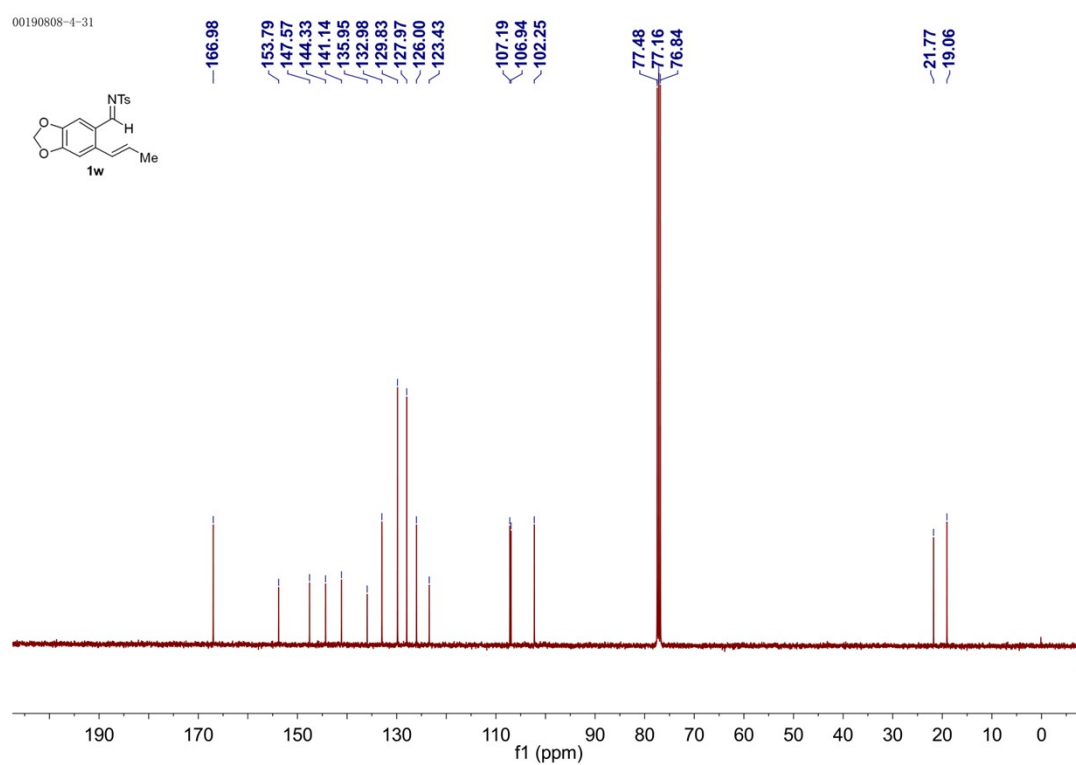

4-methyl-N-((E)-2-((E)-3-phenoxyprop-1-en-1-yl)benzylidene)benzenesulfonamide (**3a**)

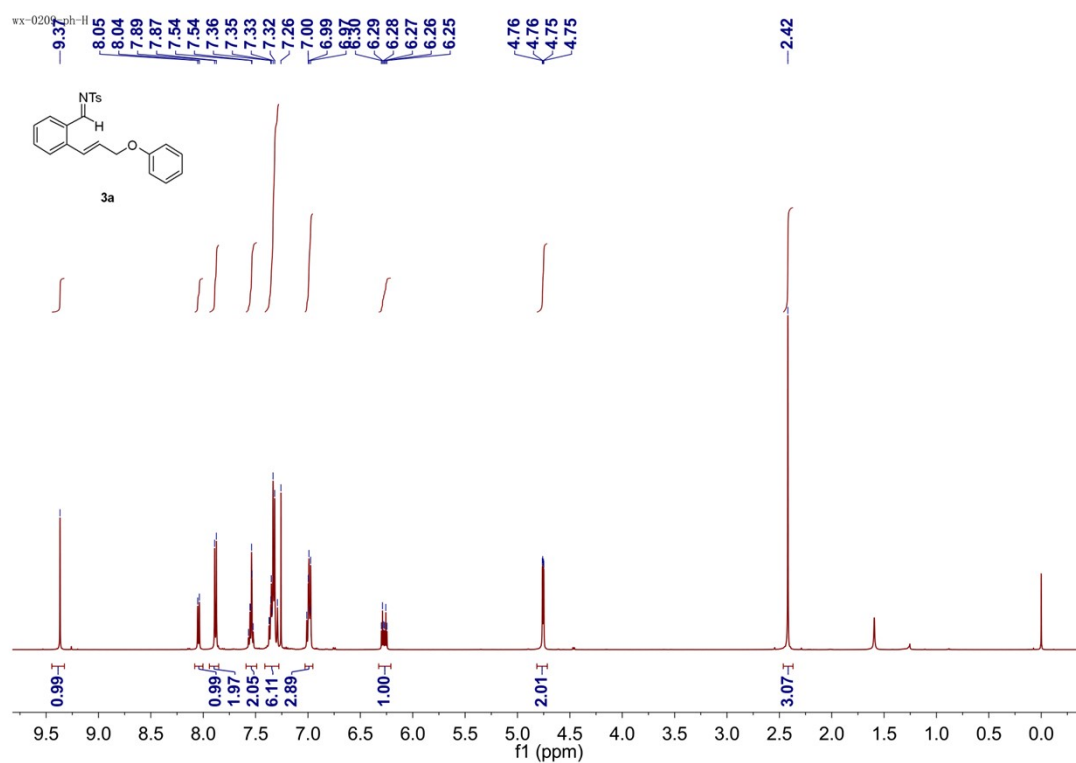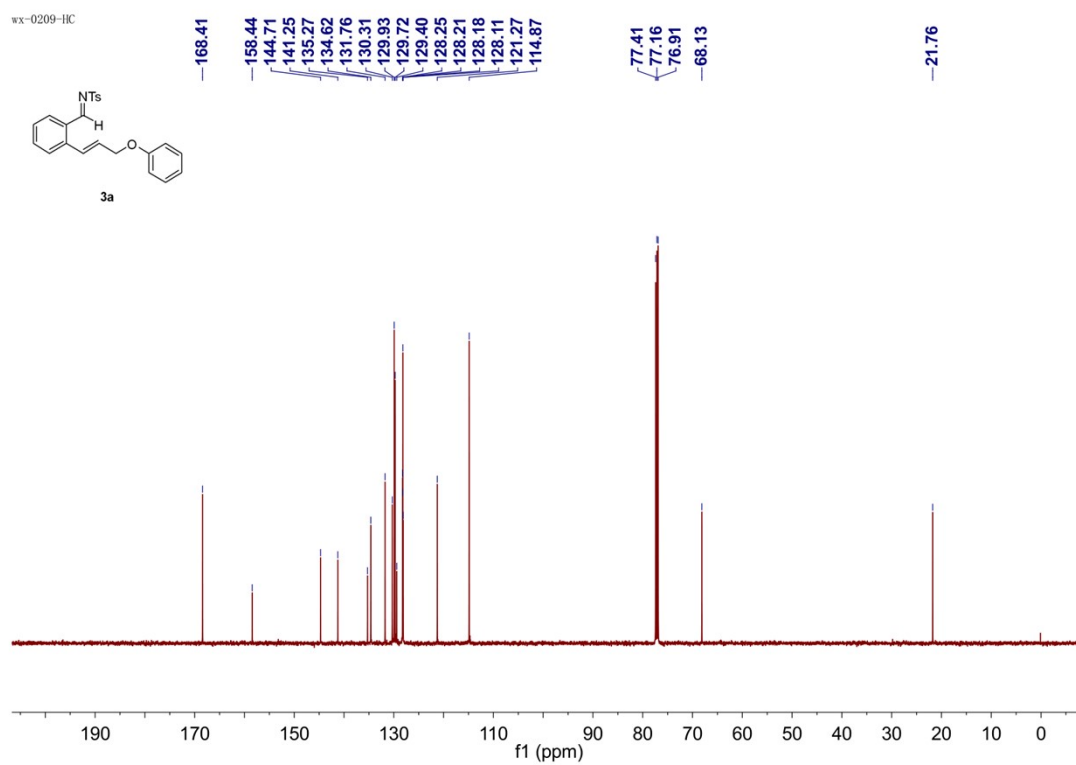

4-methyl-N-((E)-2-((E)-3-(p-tolyloxy)prop-1-en-1-yl)benzylidene)benzenesulfonamide (**3b**)

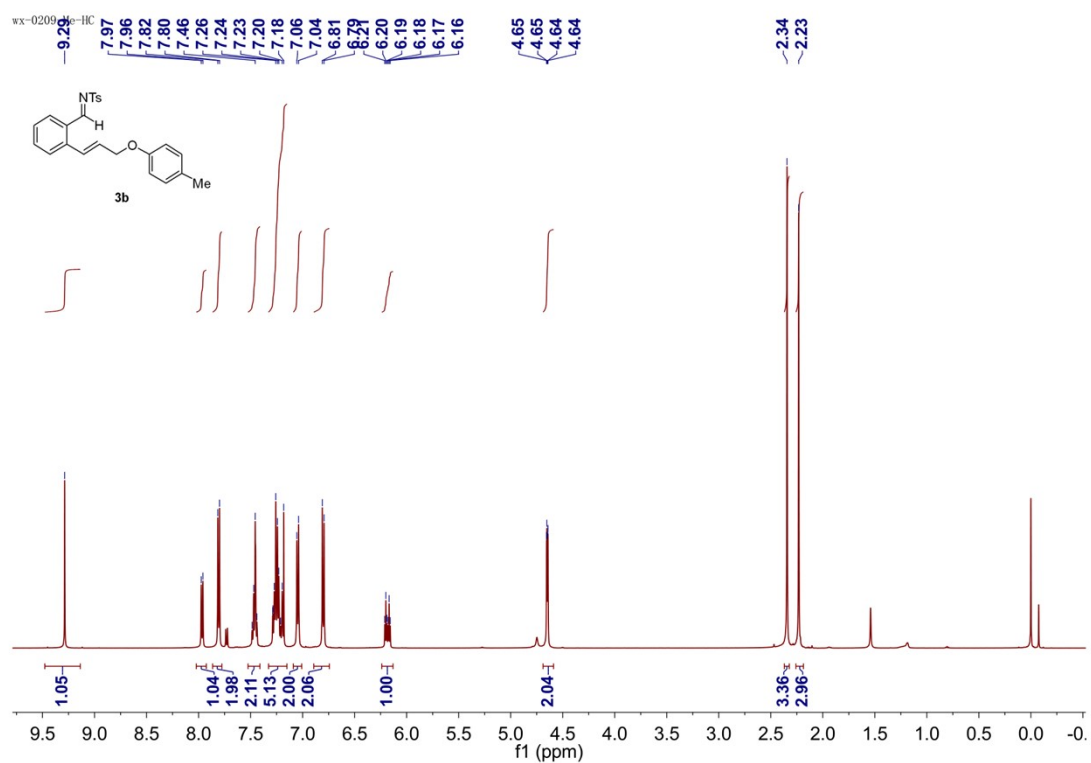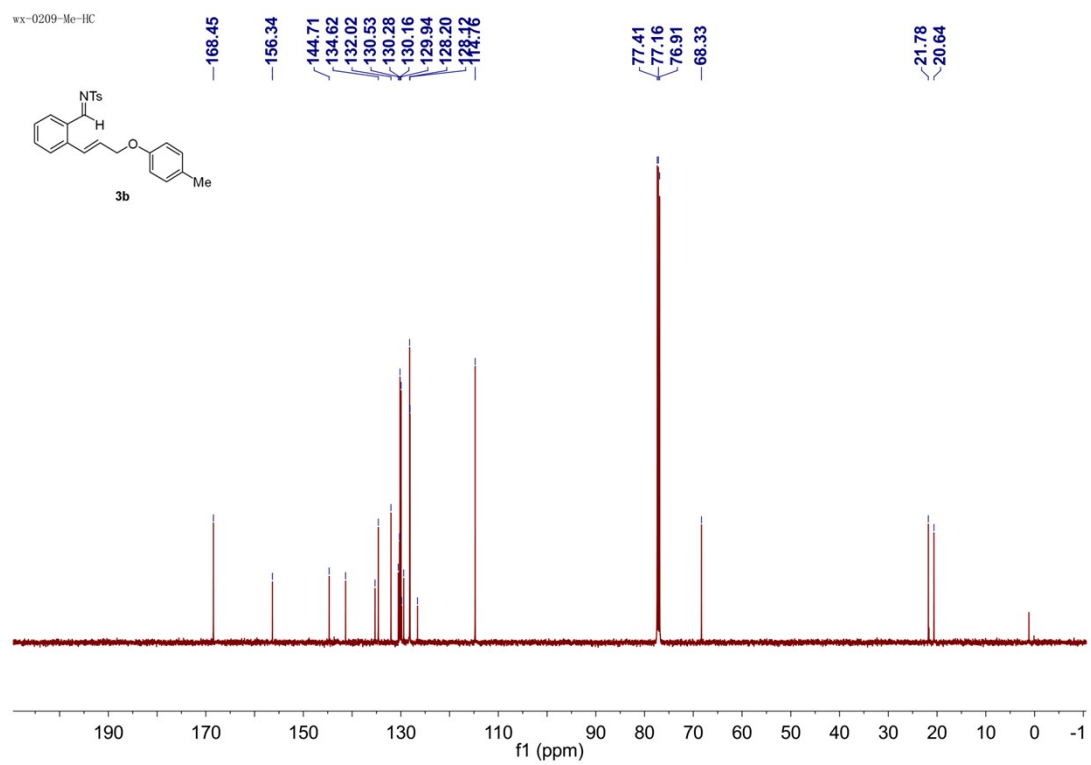

N-((E)-2-((E)-3-(4-ethylphenoxy)prop-1-en-1-yl)benzylidene)-4-methylbenzenesulfonamide (**3c**)

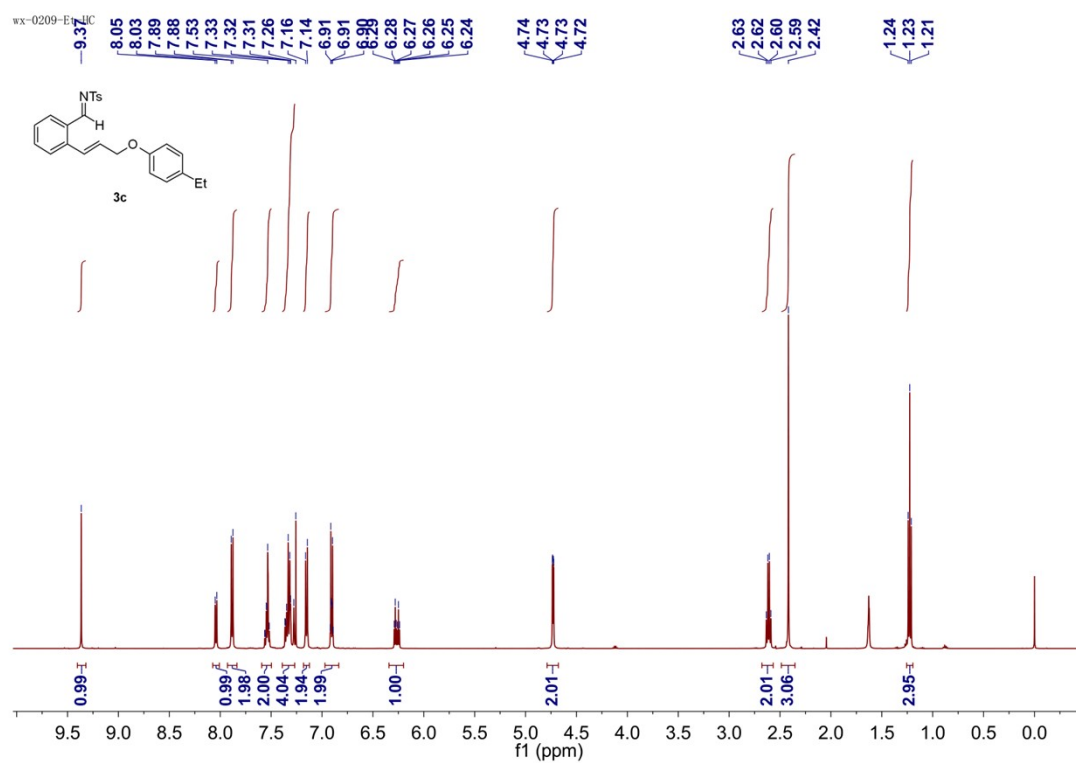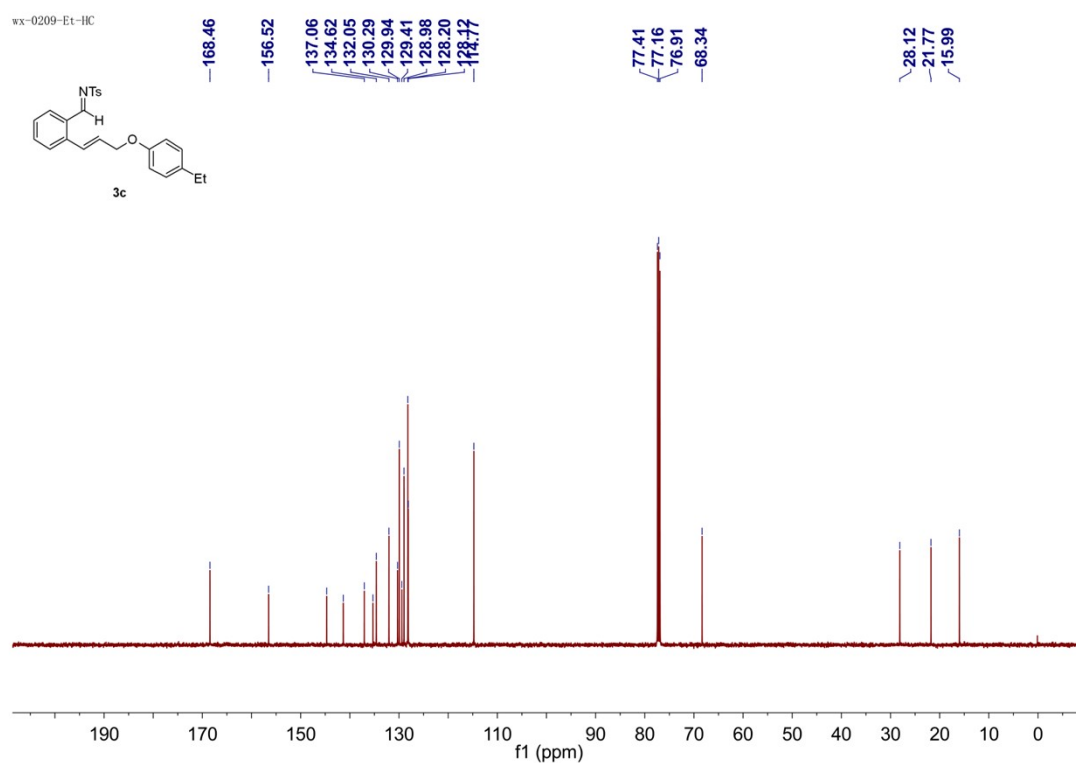



N-((E)-2-((E)-3-(4-fluorophenoxy)prop-1-en-1-yl)benzylidene)-4-methylbenzenesulfonamide (**3d**)

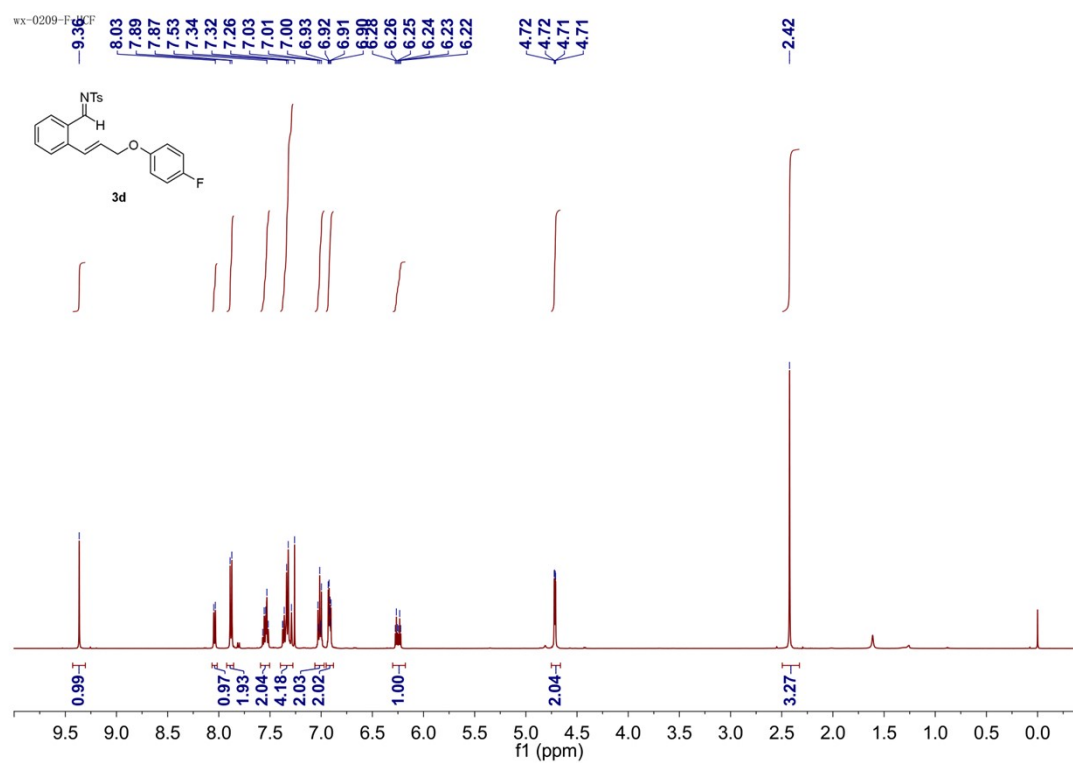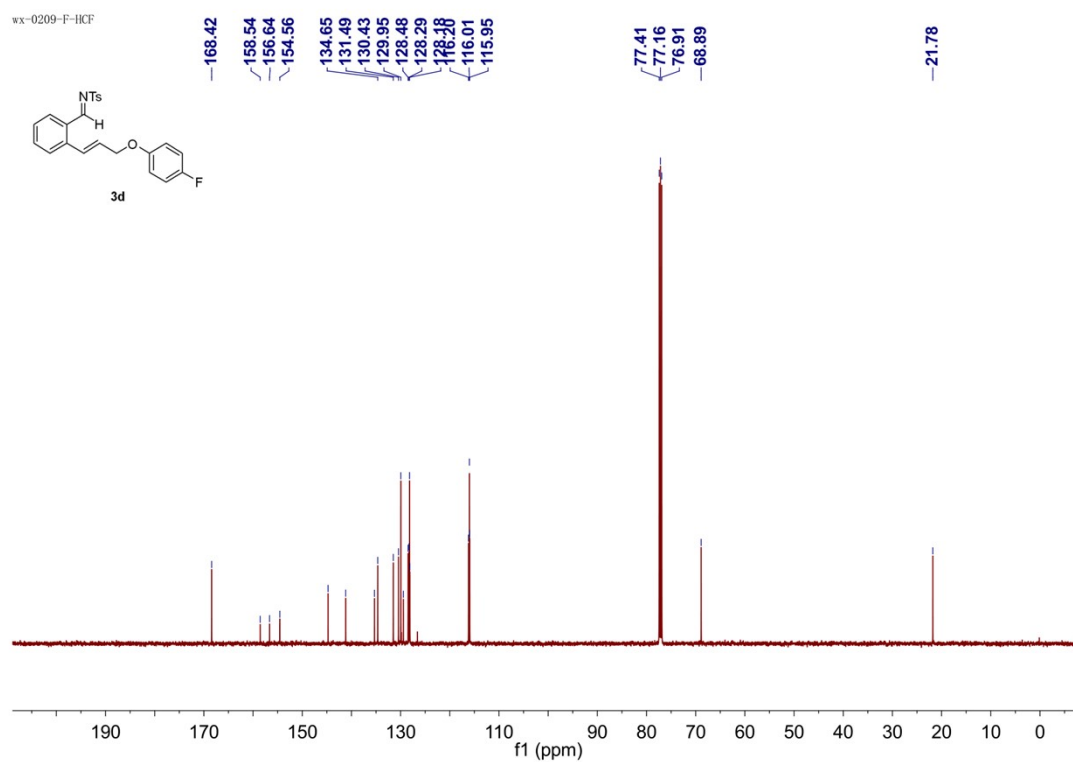

N-((E)-2-((E)-3-(4-methoxyphenoxy)prop-1-en-1-yl)benzylidene)-4-methylbenzenesulfonamide  
(**3e**)

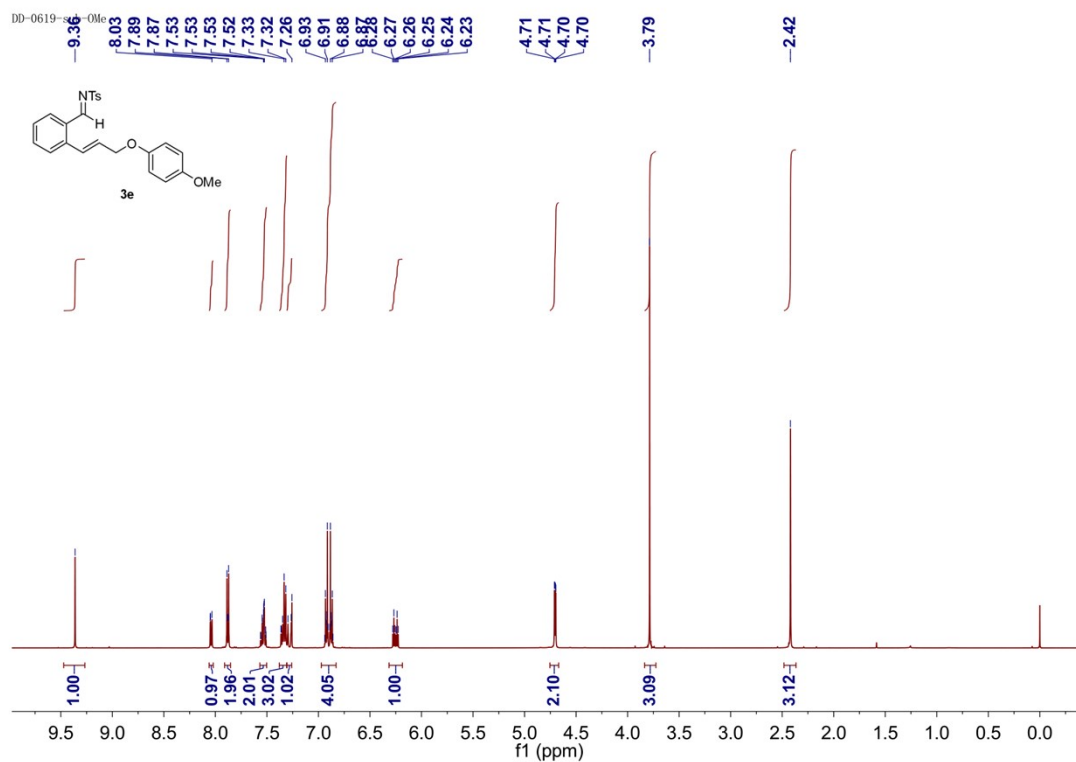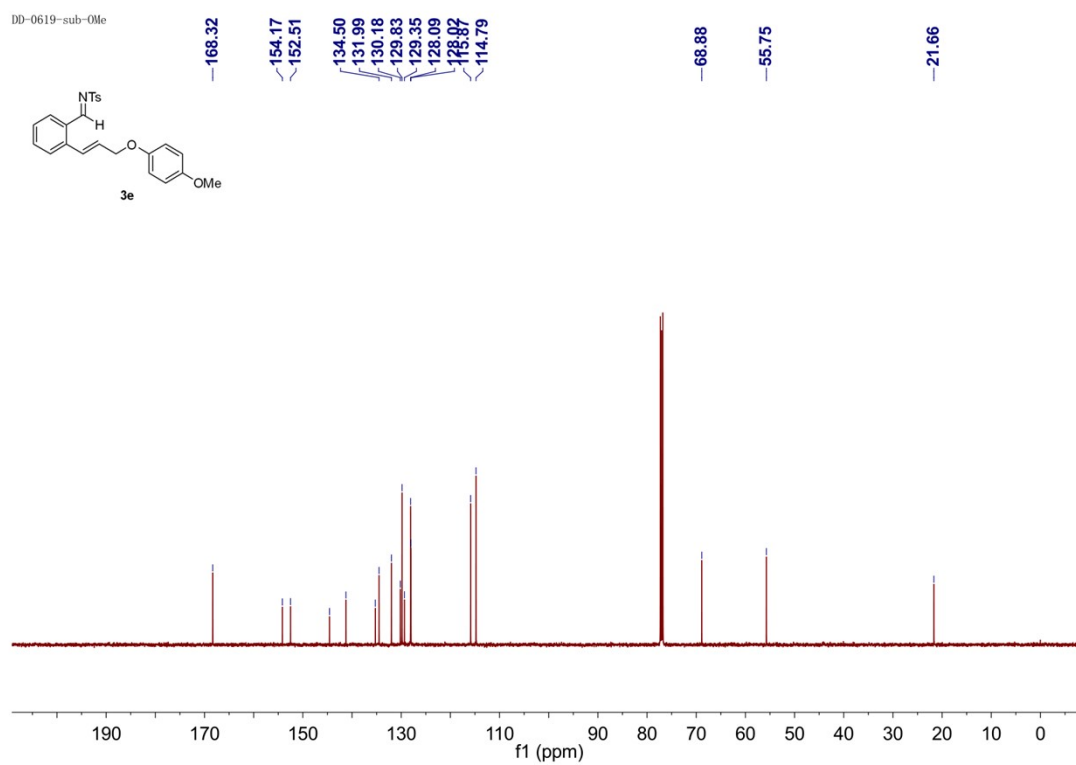

4-methyl-N-((E)-2-((E)-3-(4-(trifluoromethyl)phenoxy)prop-1-en-1-yl)benzylidene)benzenesulfonamide (**3f**)

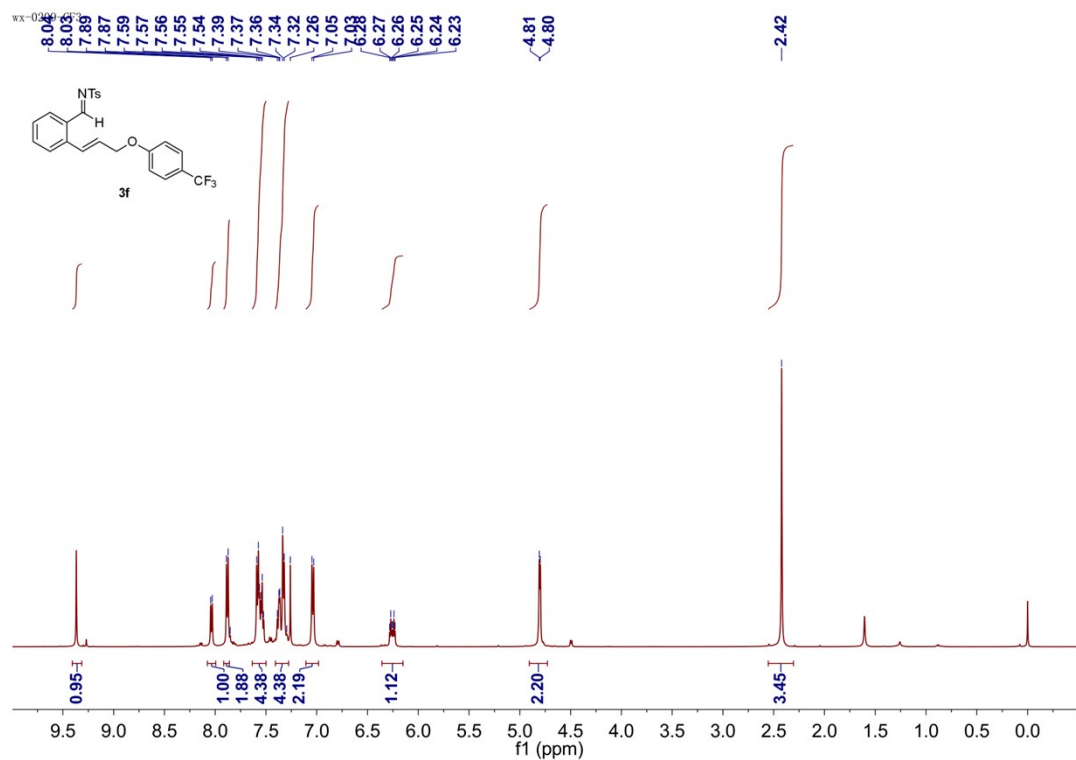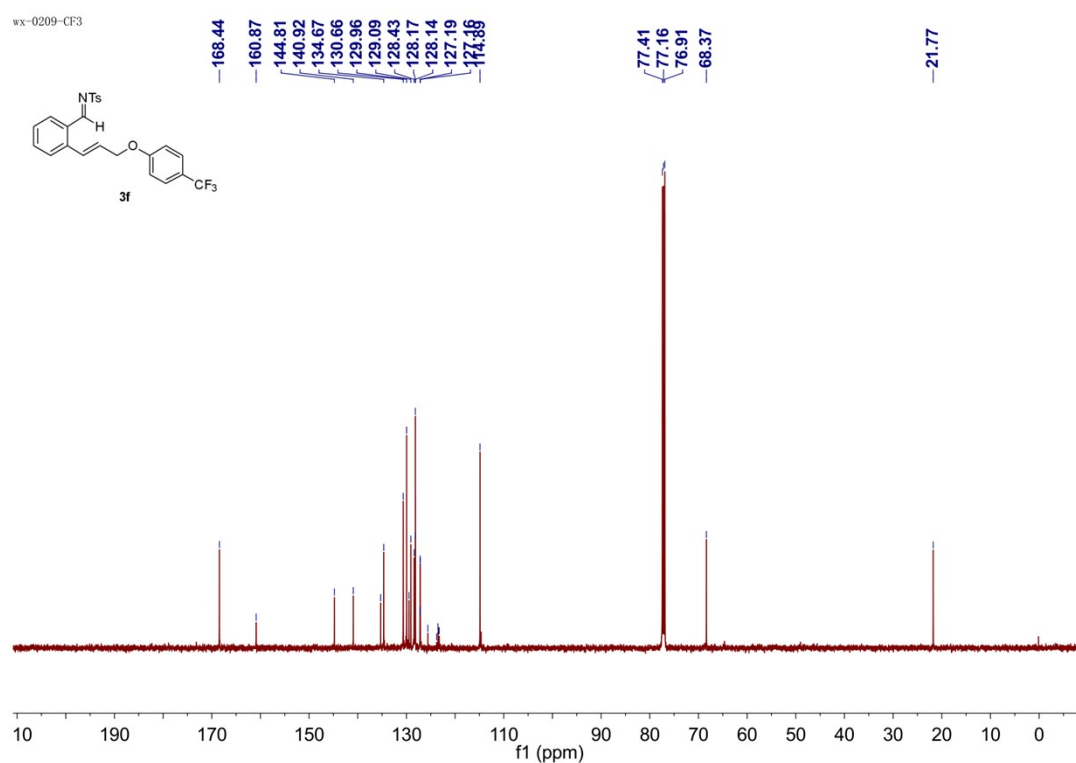

(S)-4-methyl-N-(2-methyl-1H-inden-1-yl)benzenesulfonamide (**2a**)

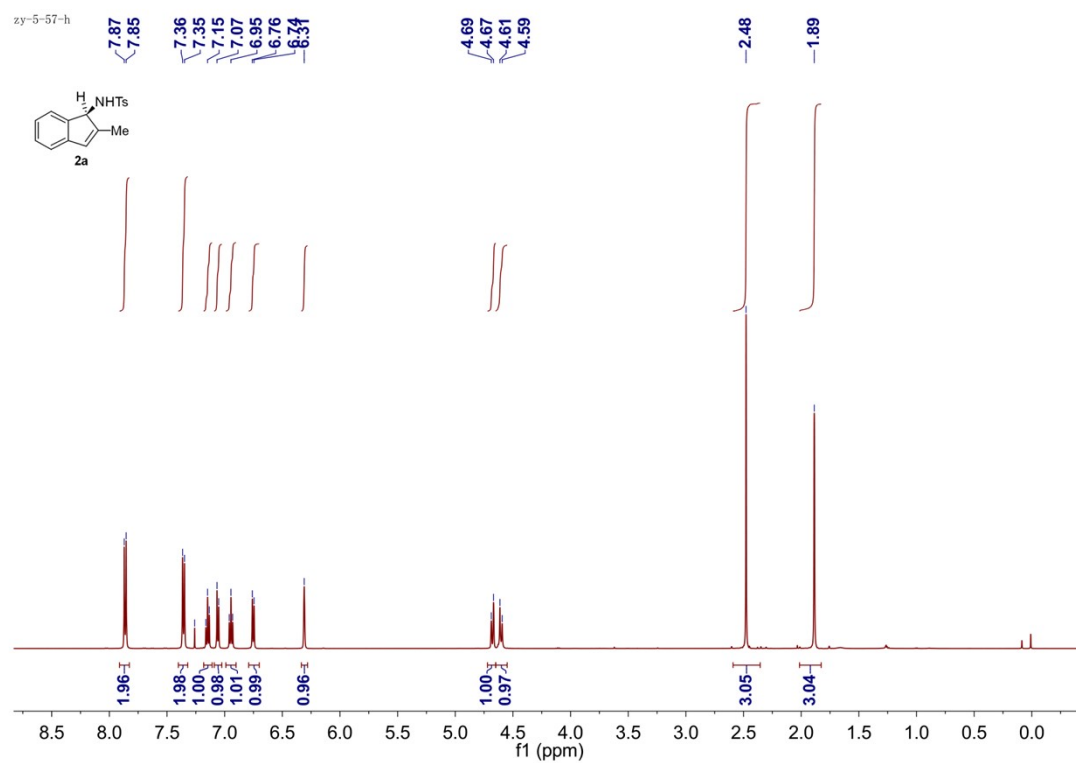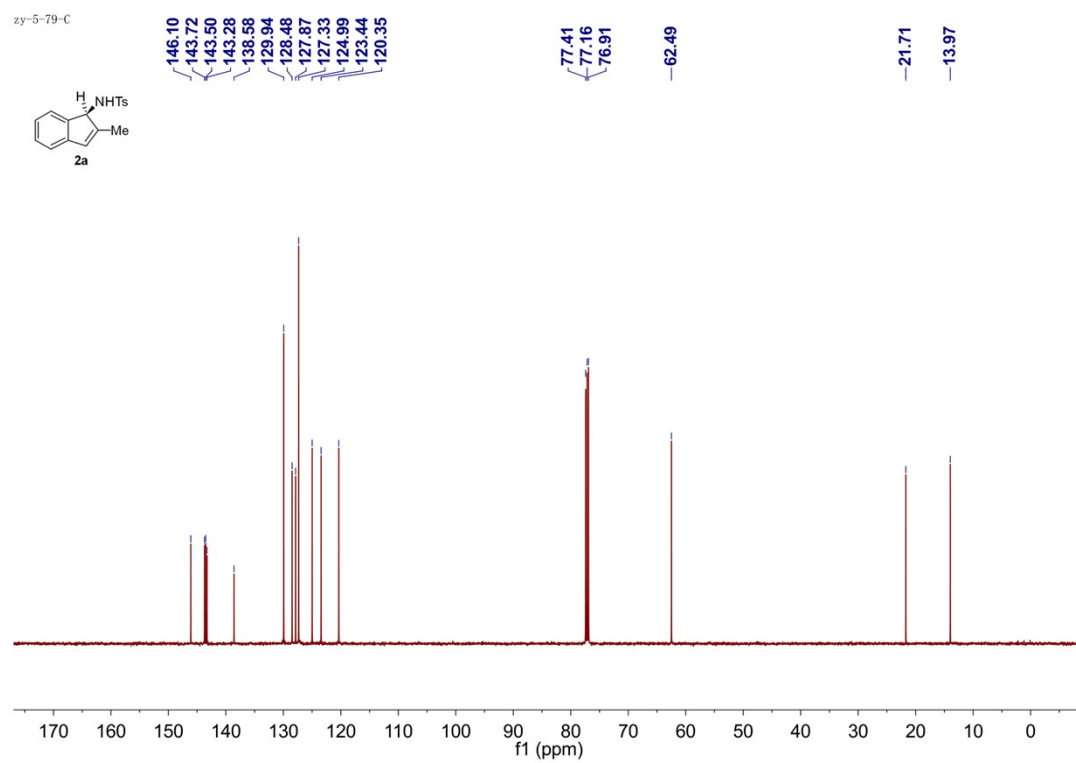

(S)-N-(1H-inden-1-yl)-4-methylbenzenesulfonamide (**2b**)

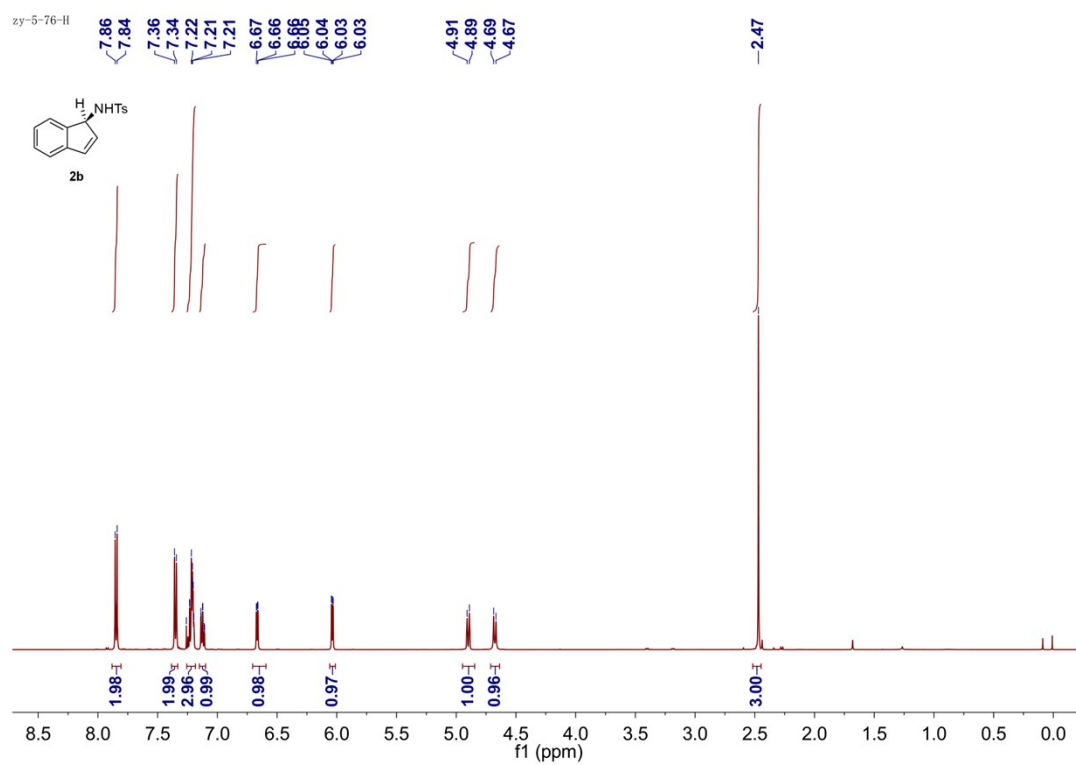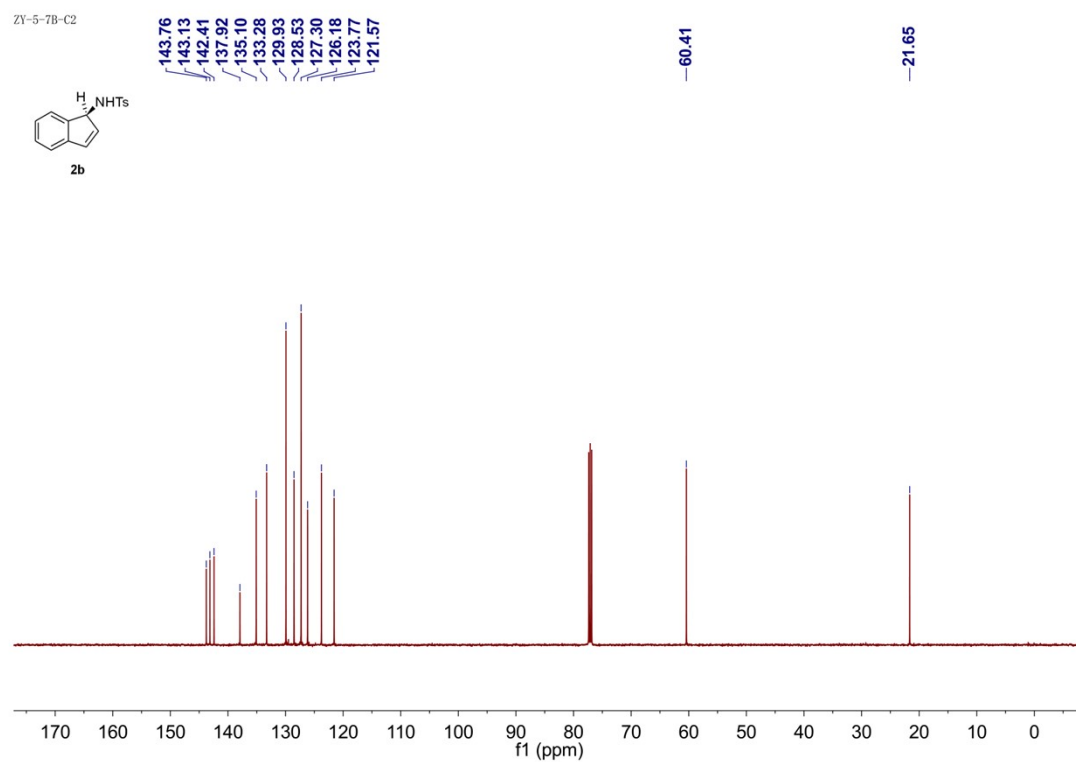

(R)-4-methyl-N-(2-phenyl-1H-inden-1-yl)benzenesulfonamide (**2c**)

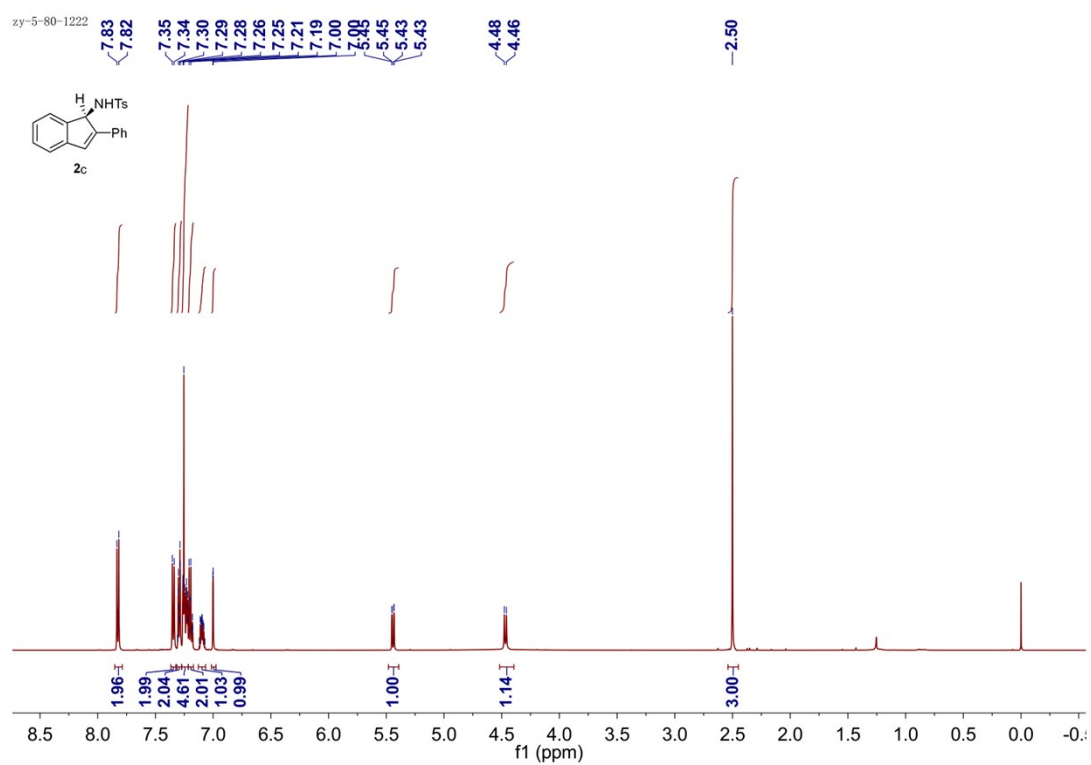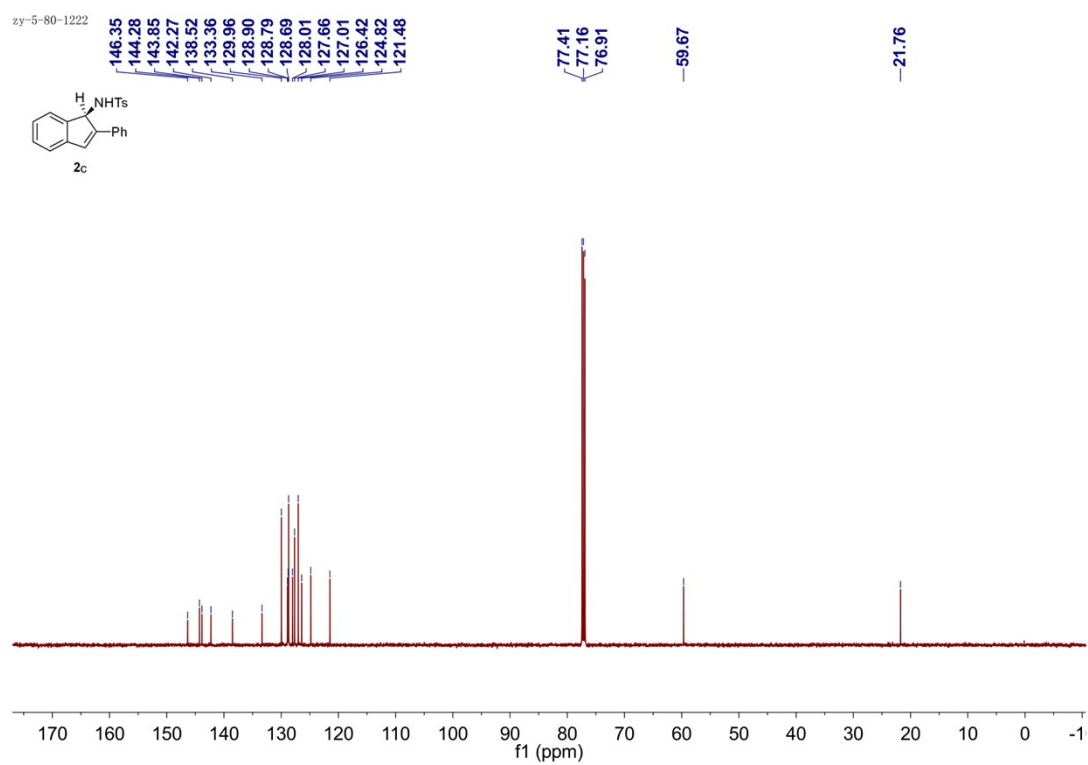

(S)-N-(2-benzyl-1H-inden-1-yl)-4-methylbenzenesulfonamide (**2d**)

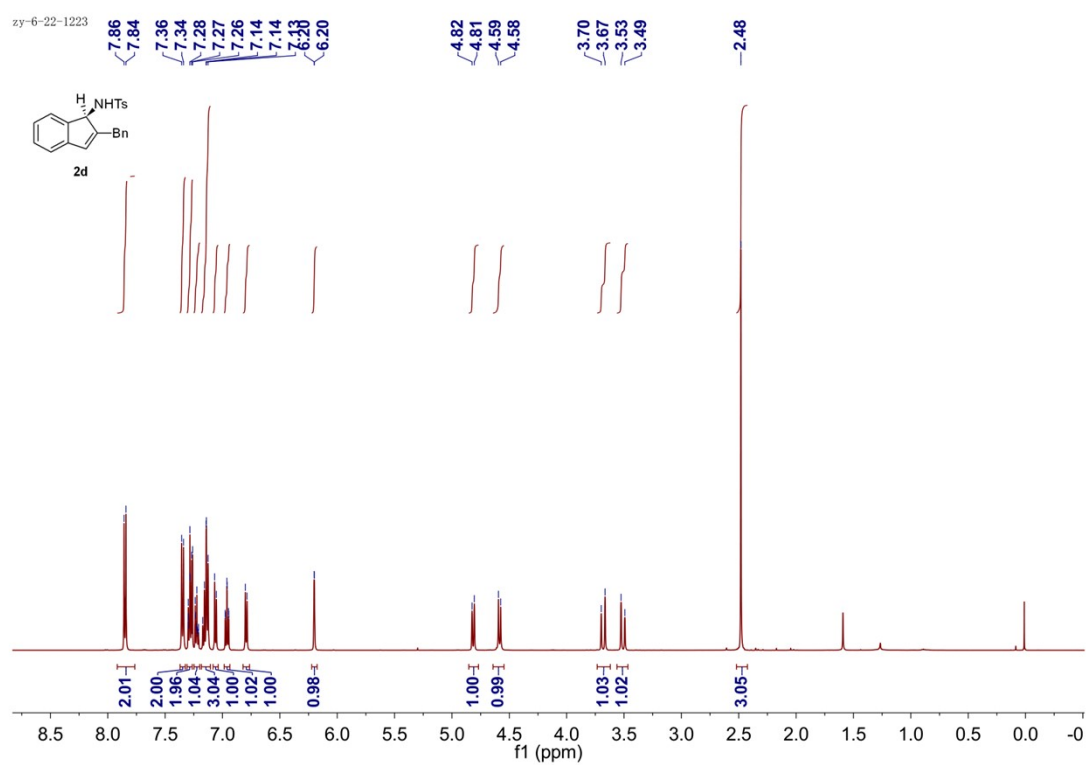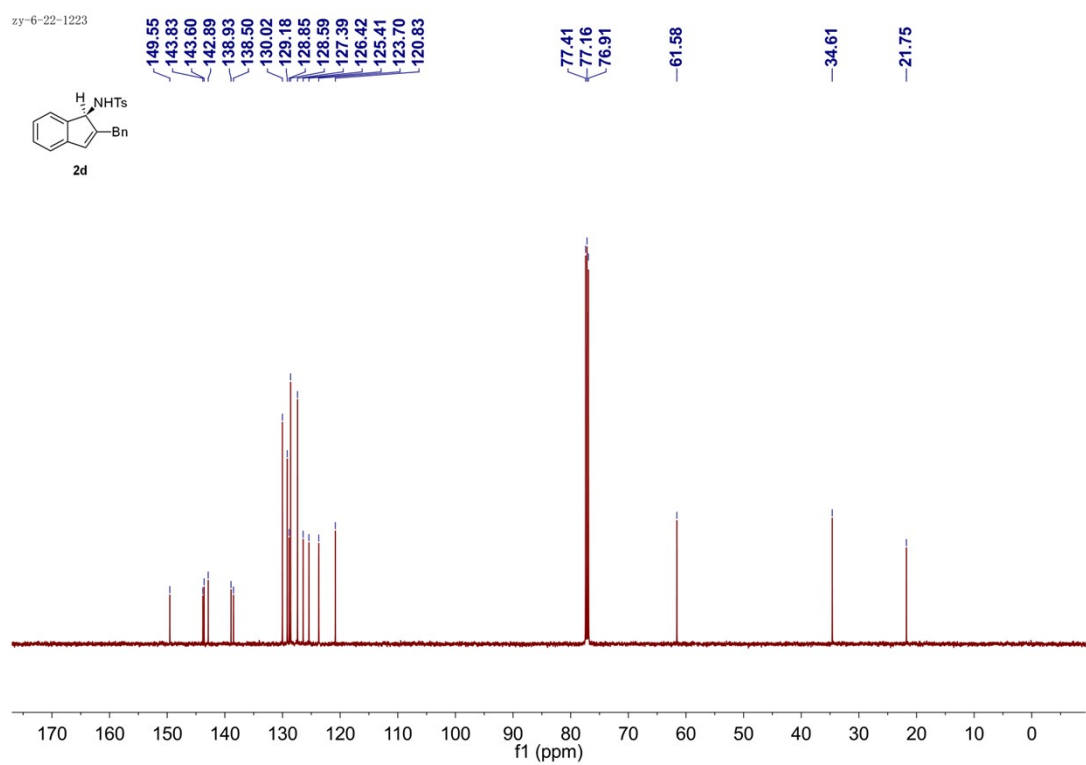

(S)-4-methyl-N-(2-propyl-1H-inden-1-yl)benzenesulfonamide (**2e**)

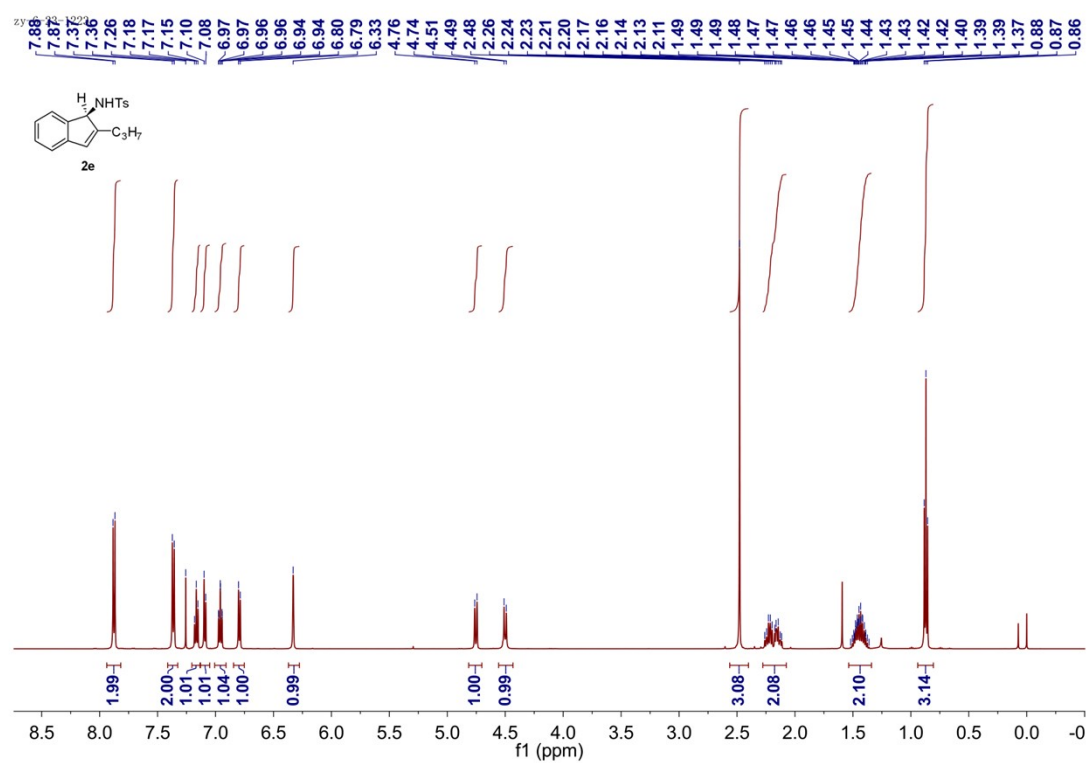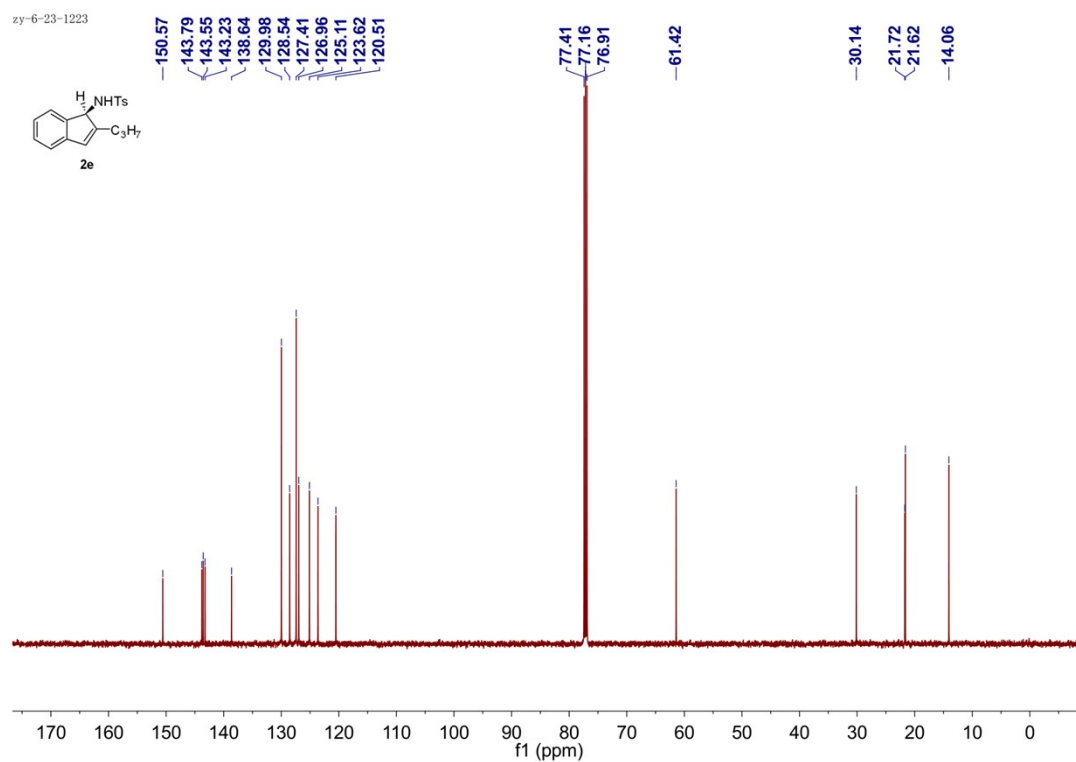



(S)-N-(2-cyclopropyl-1H-inden-1-yl)-4-methylbenzenesulfonamide (**2f**)

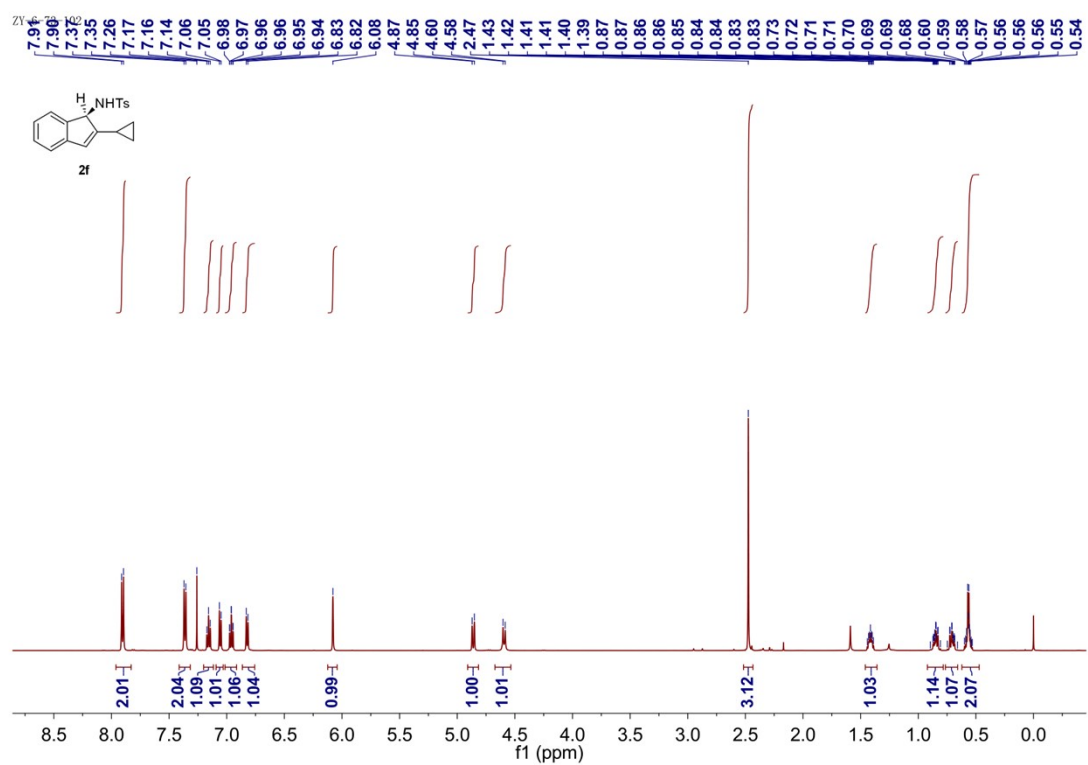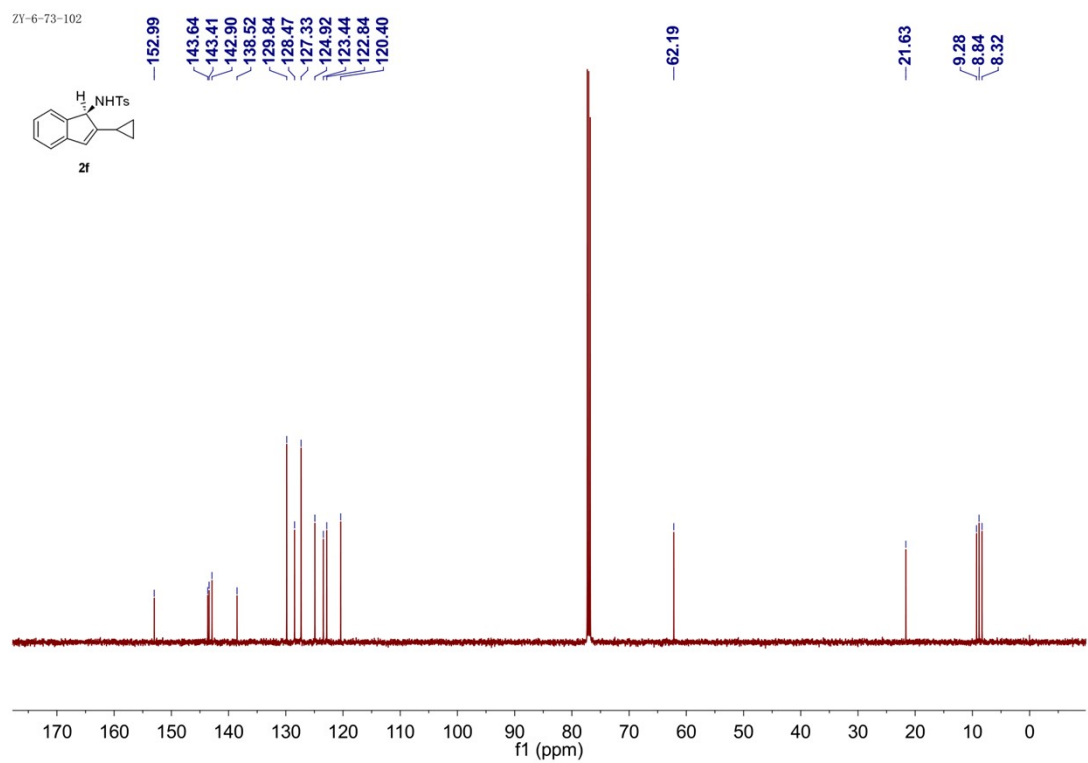

(S)-N-(2-cyclohexyl-1H-inden-1-yl)-4-methylbenzenesulfonamide (**2g**)

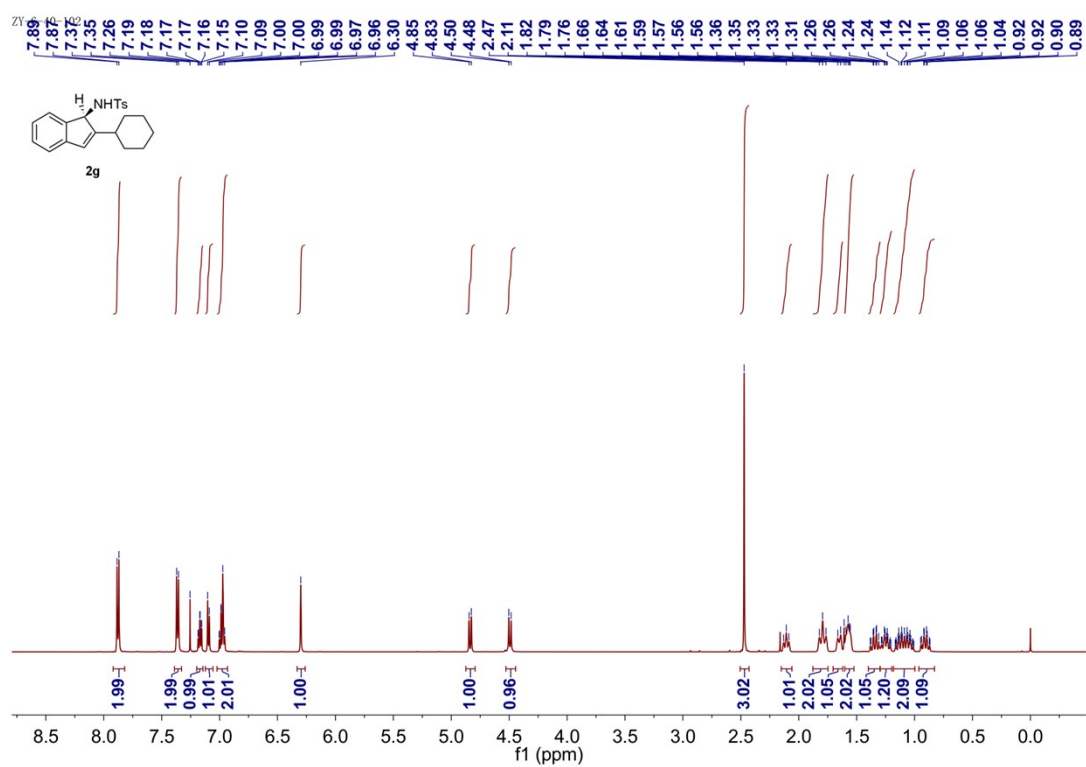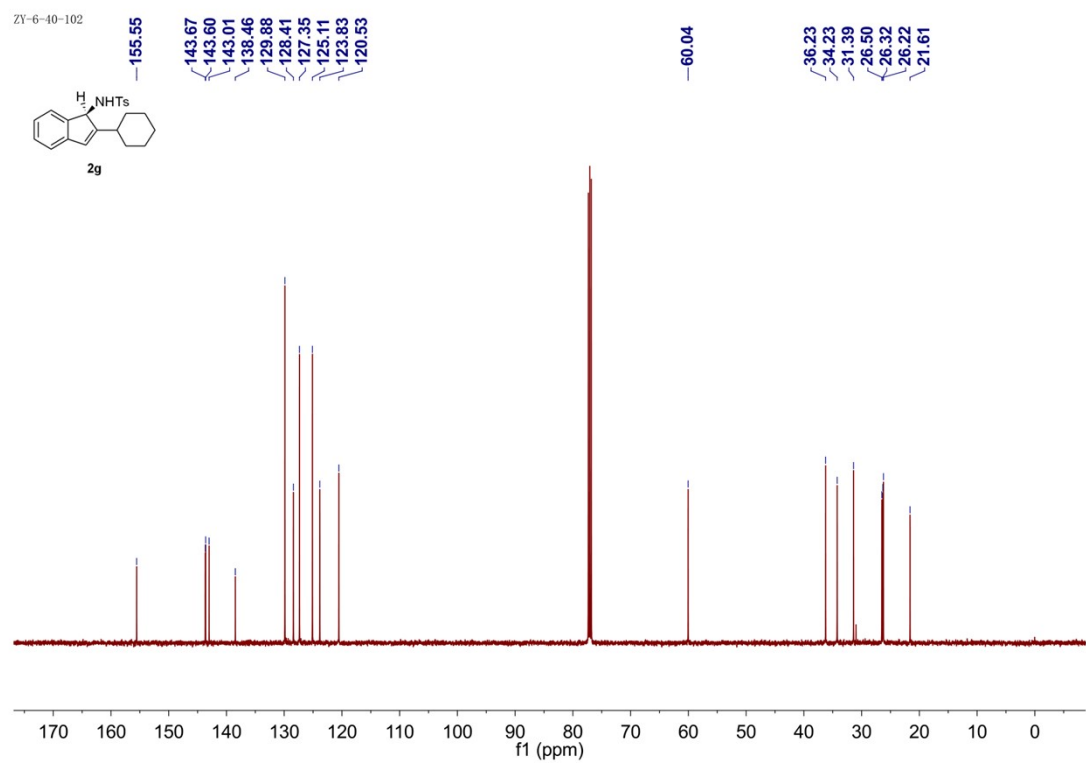

(S)-N-(2-(tert-butyl)-1H-inden-1-yl)-4-methylbenzenesulfonamide (**2h**)

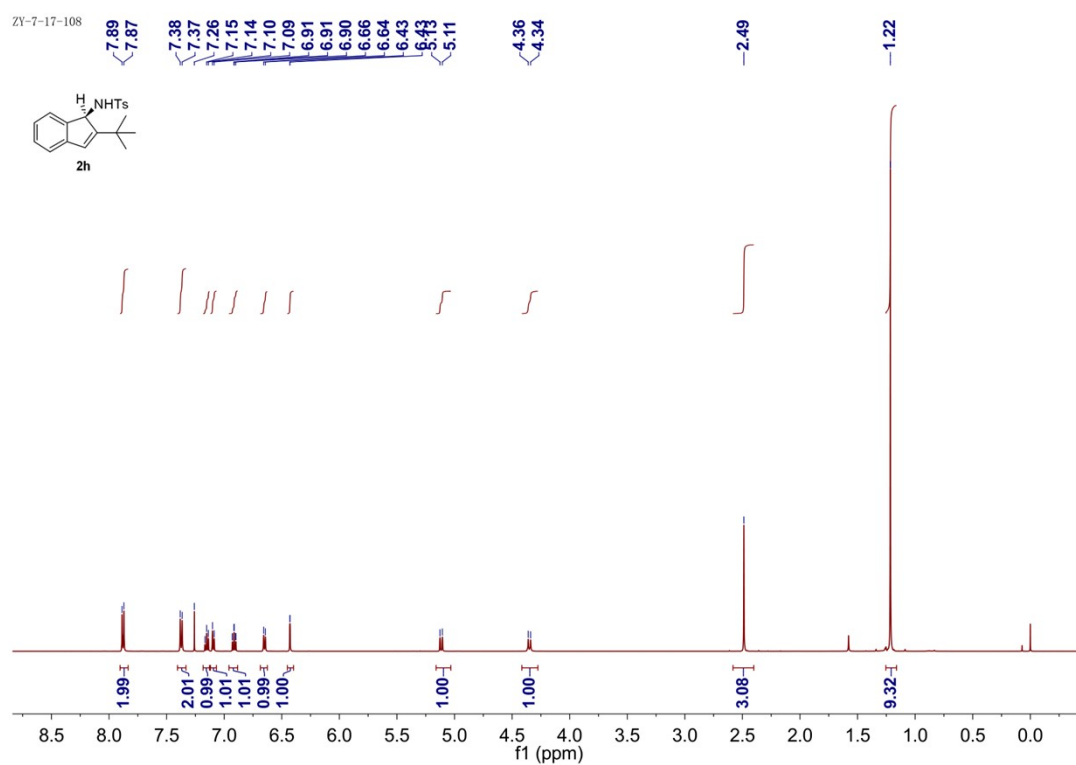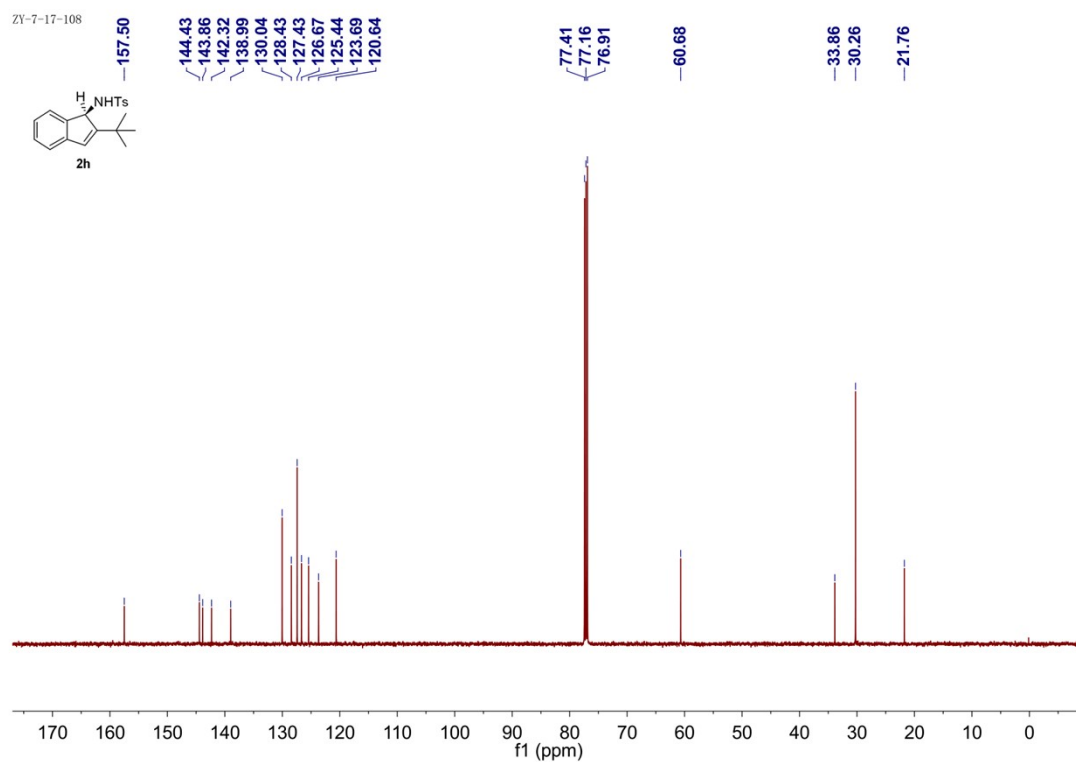

(S)-4-methyl-N-(3-methyl-1H-inden-1-yl)benzenesulfonamid (**2i**)

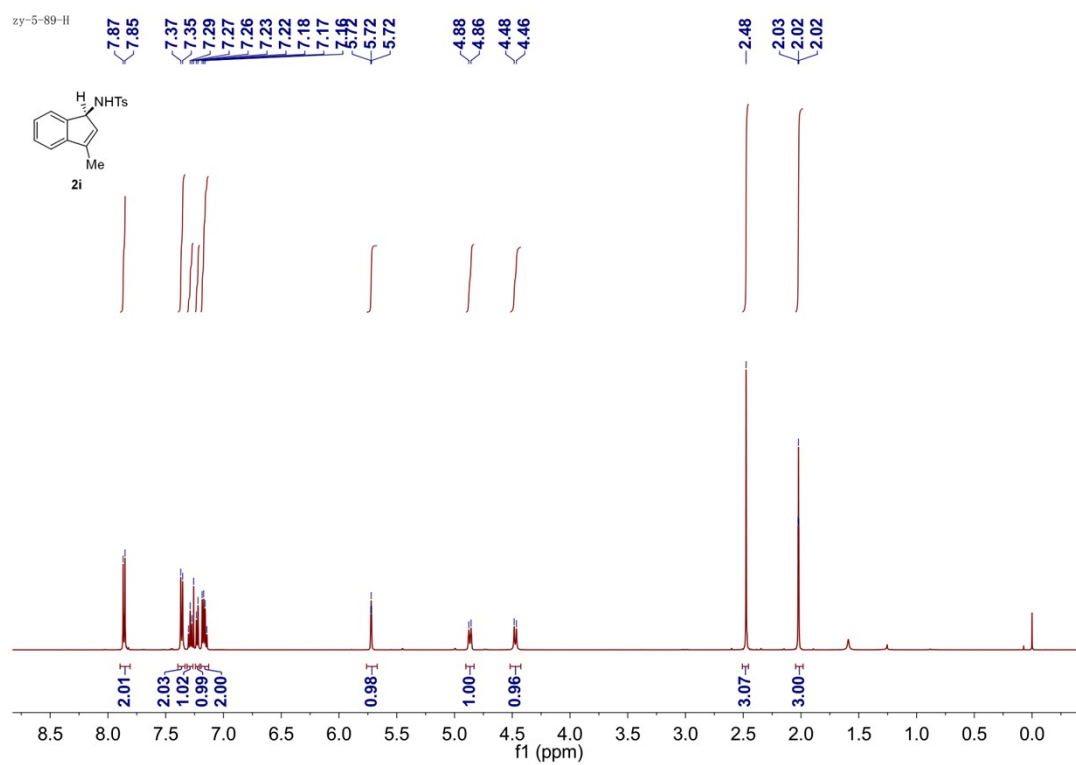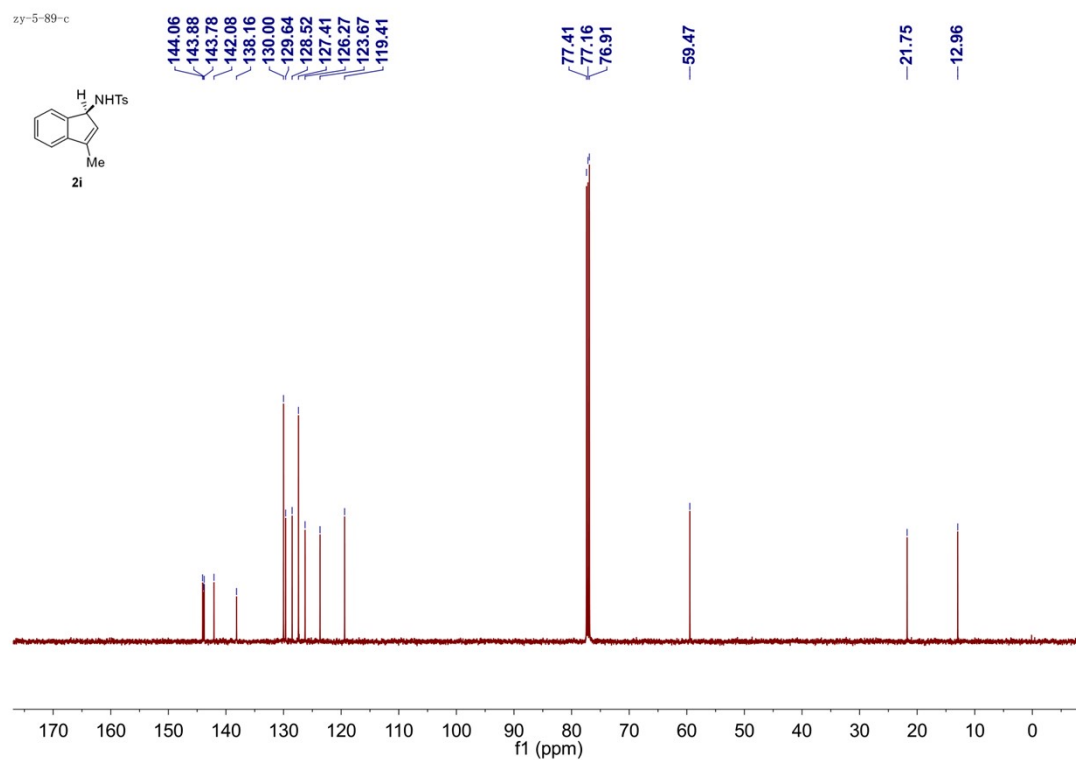

(S)-N-(3-(tert-butyl)-1H-inden-1-yl)-4-methylbenzenesulfonamide (**2j**)

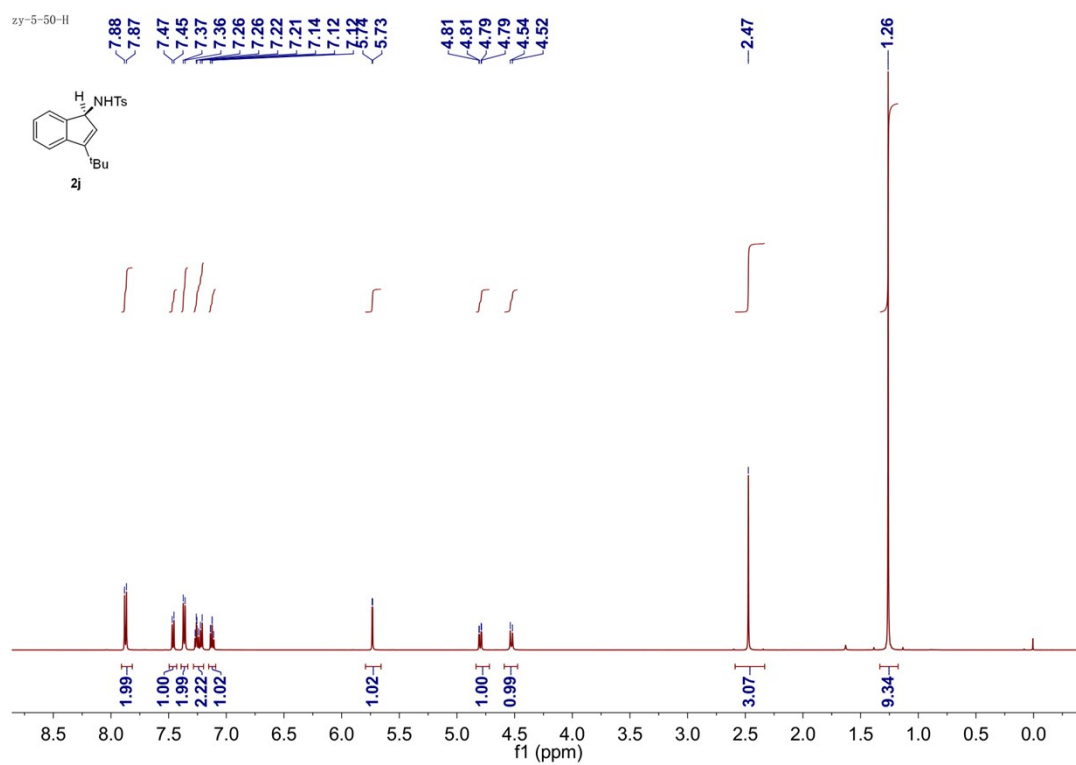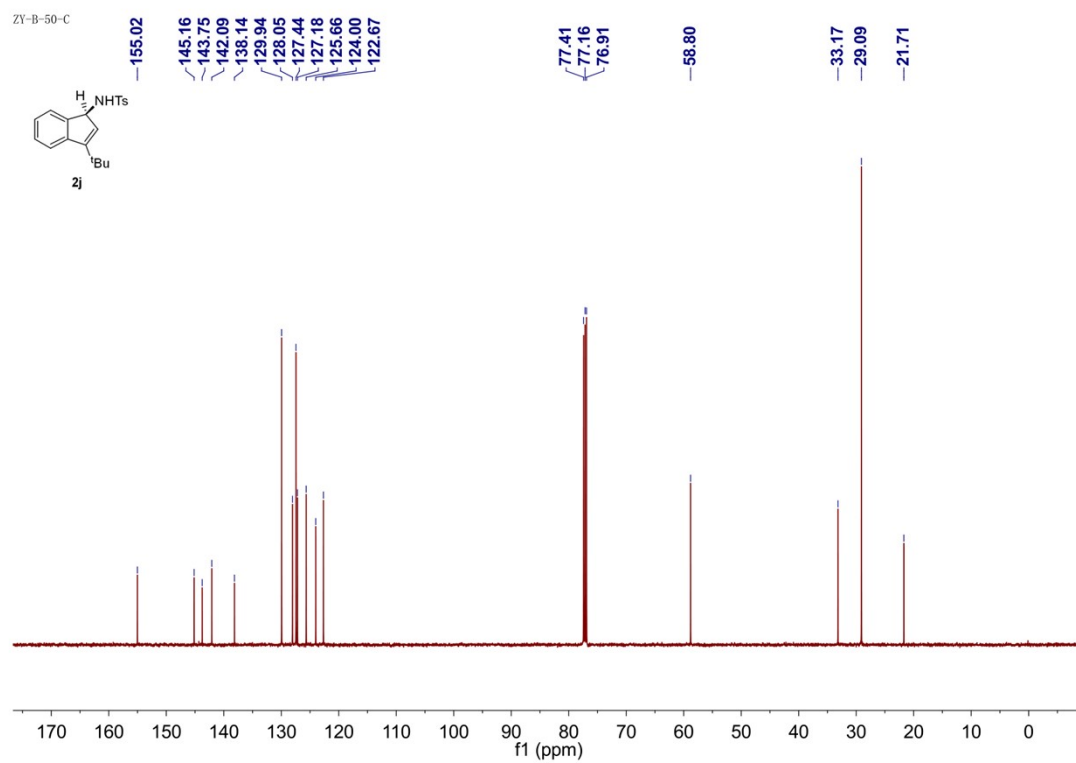

(S)-4-methyl-N-(3-phenyl-1H-inden-1-yl)benzenesulfonamide (**2k**)

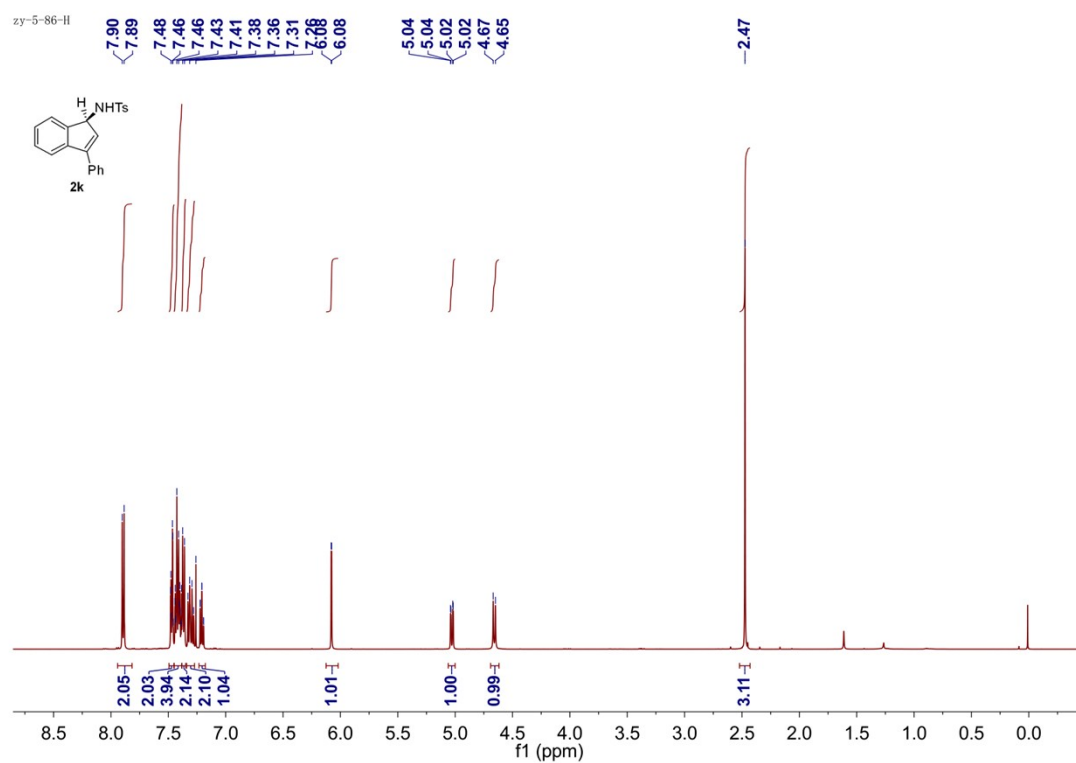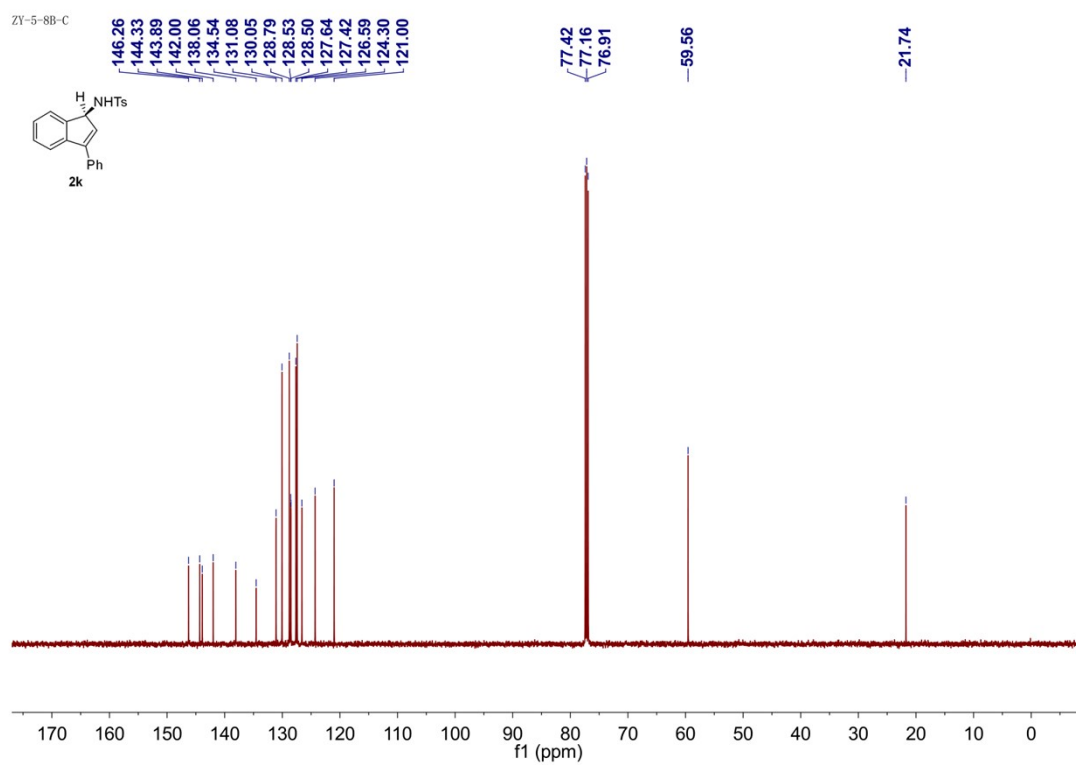

(S)-N-(3-(3,4-dichlorophenyl)-1H-inden-1-yl)-4-methylbenzenesulfonamide (**21**)

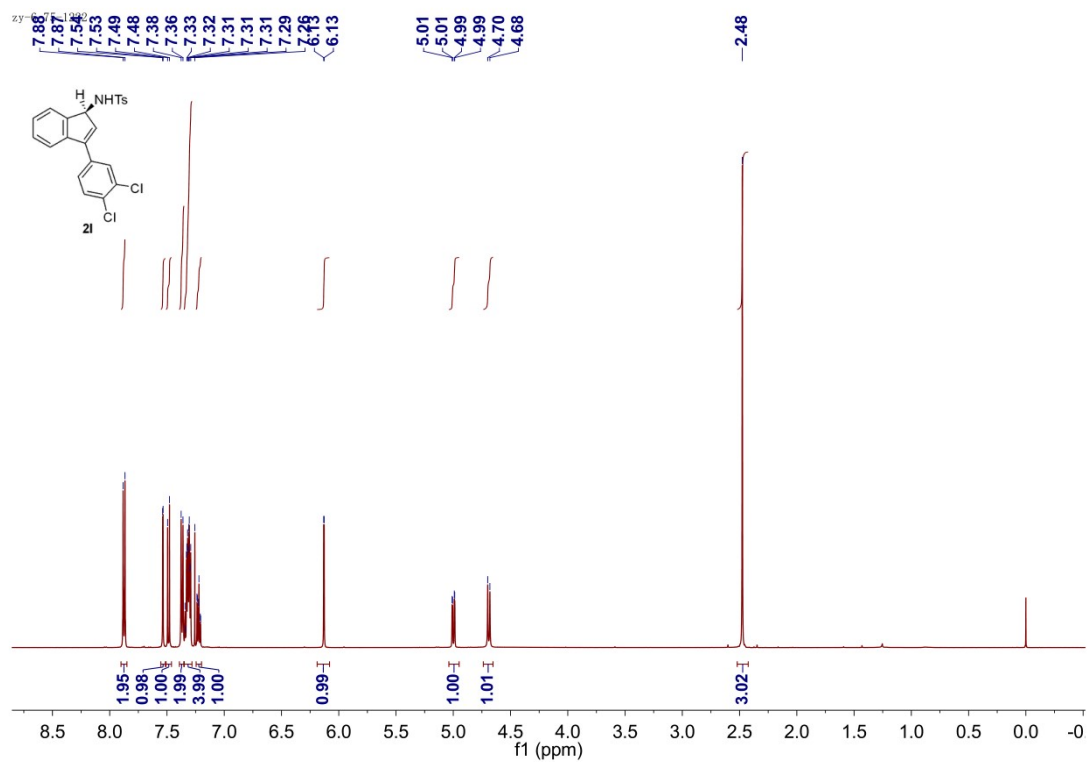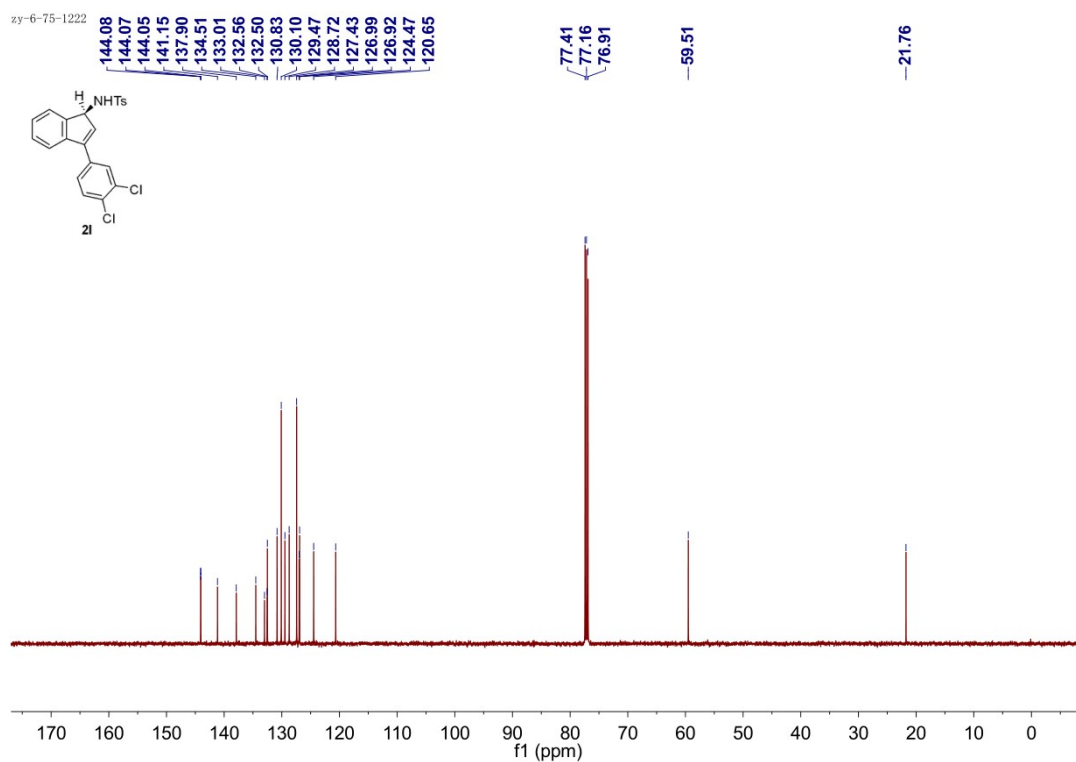

(S)-4-methyl-N-(3-(naphthalen-1-yl)-1H-inden-1-yl)benzenesulfonamide (**2m**)

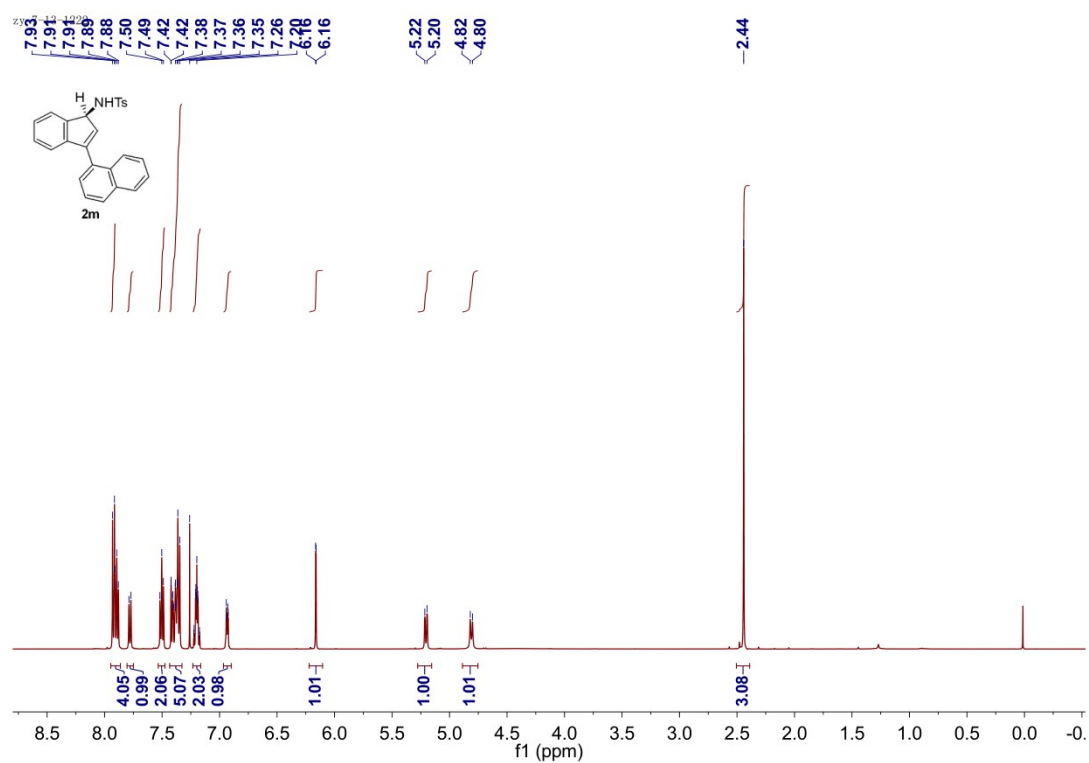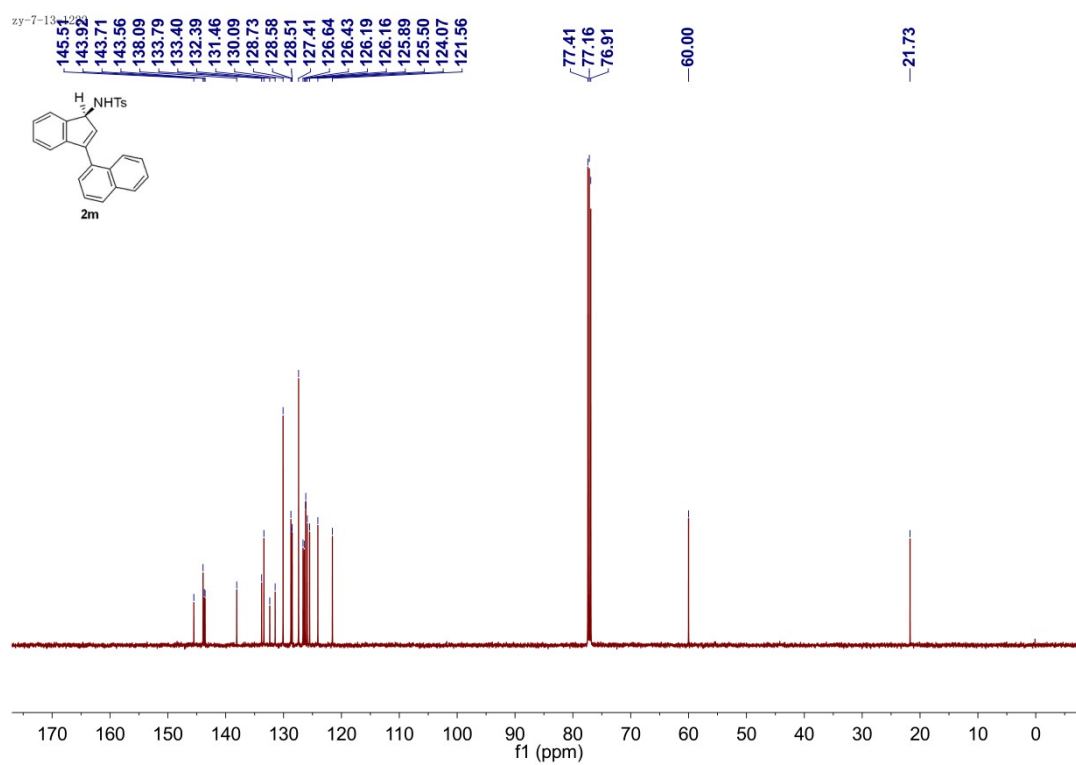



(S)-N-(2,3-dimethyl-1H-inden-1-yl)-4-methylbenzenesulfonamide (**2n**)

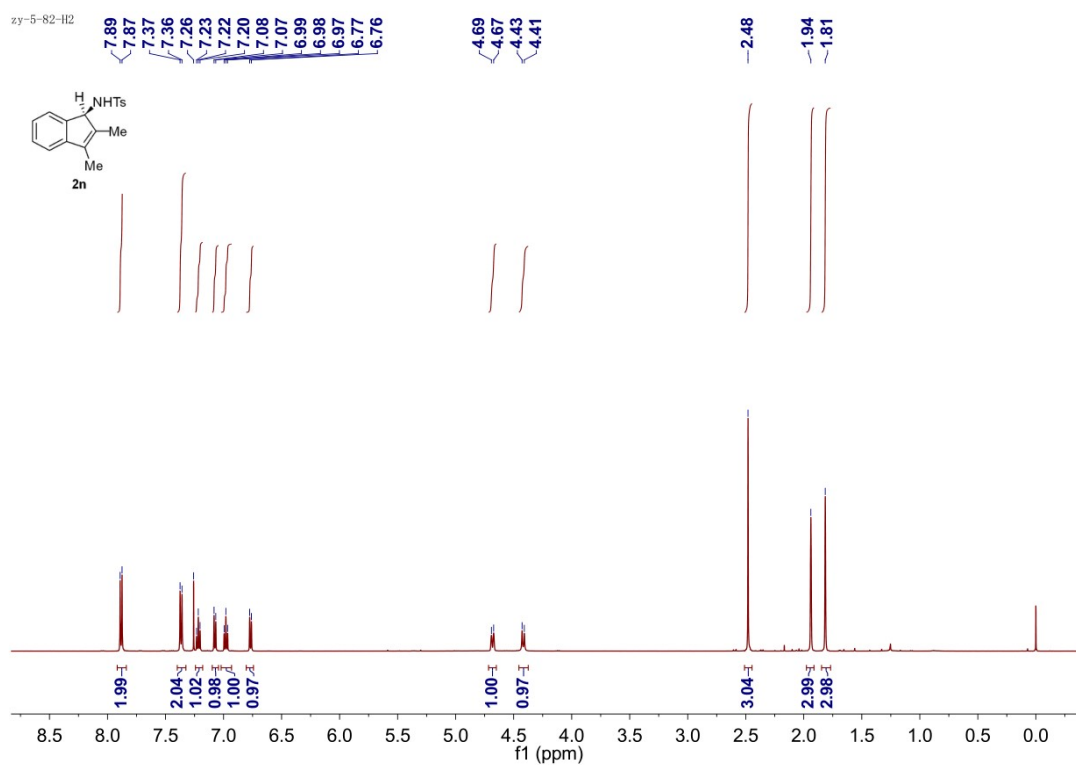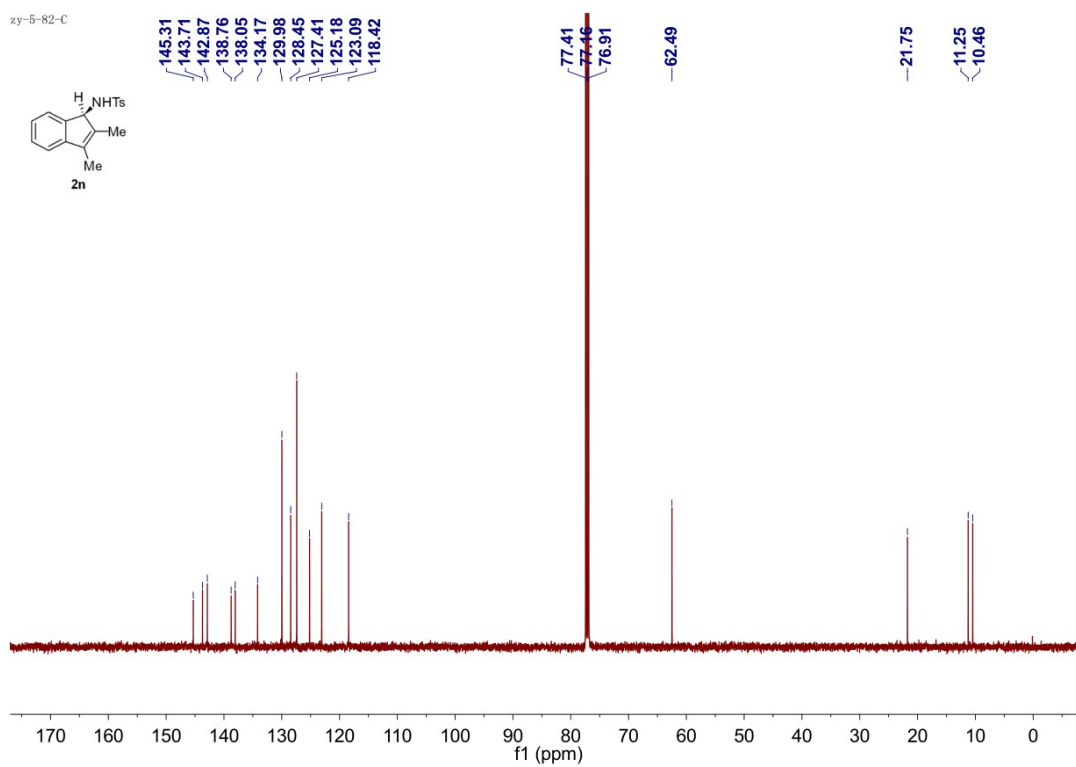

(S)-4-methyl-N-(1,2,3,8-tetrahydrocyclopenta[a]inden-8-yl)benzenesulfonamide (**2o**)

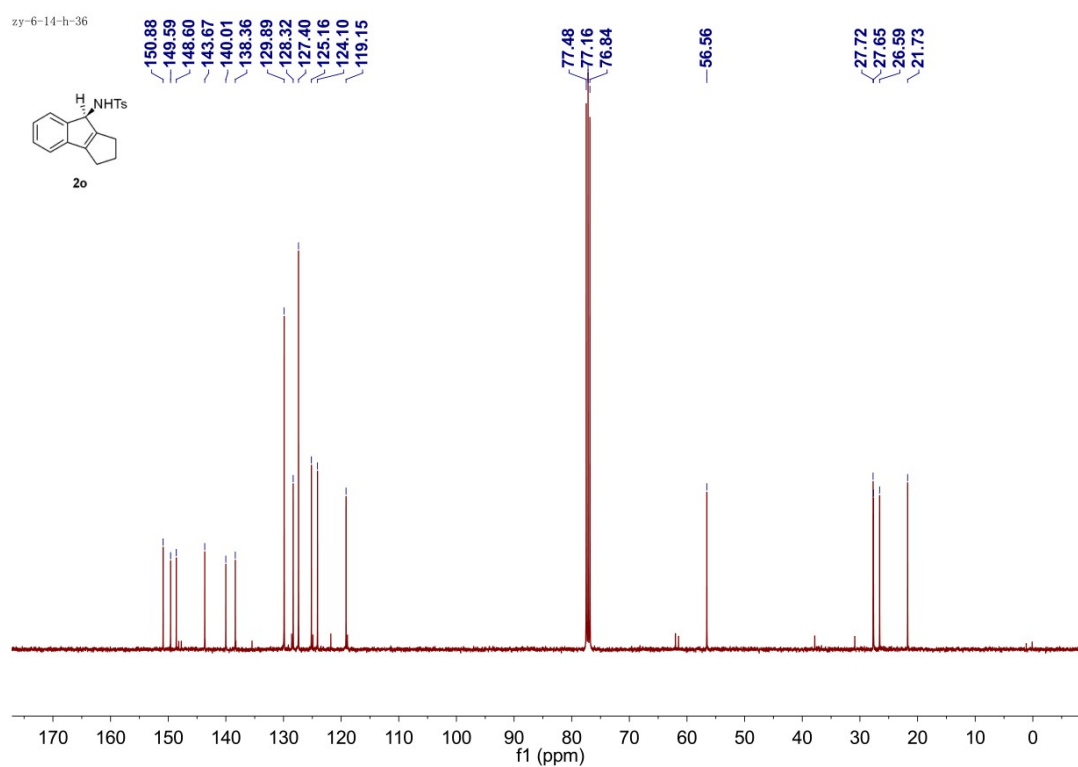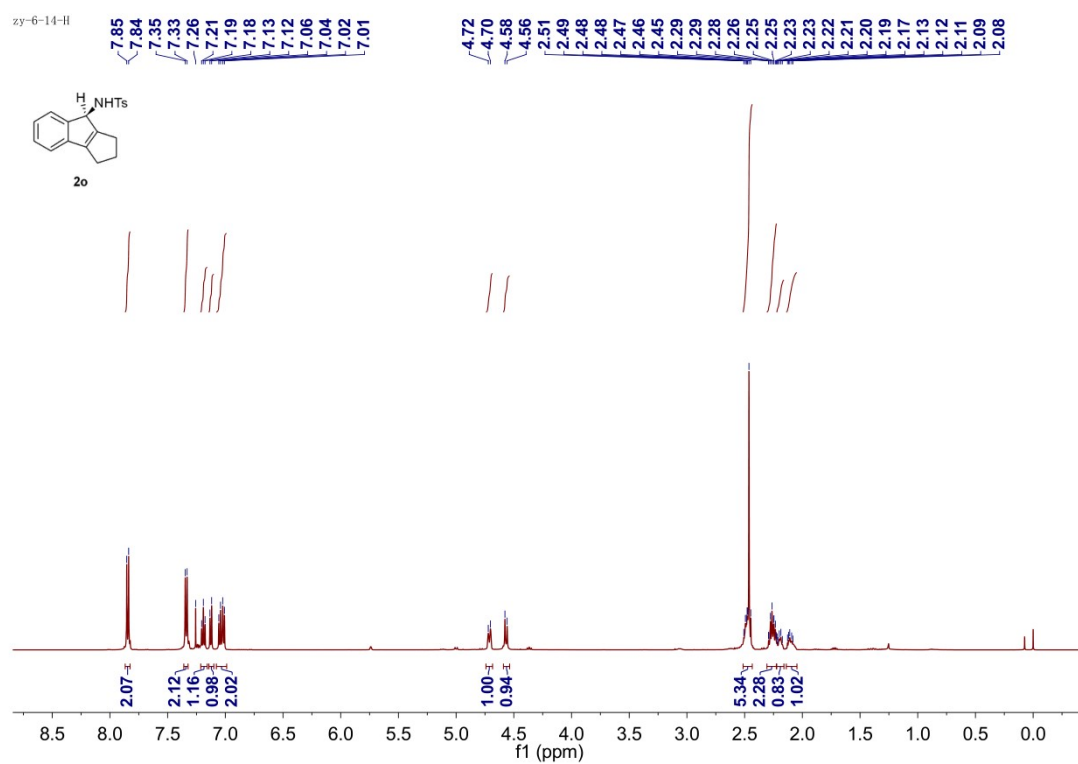

(S)-4-methyl-N-(2,3,4,9-tetrahydro-1H-fluoren-9-yl)benzenesulfonamide (**2p**)

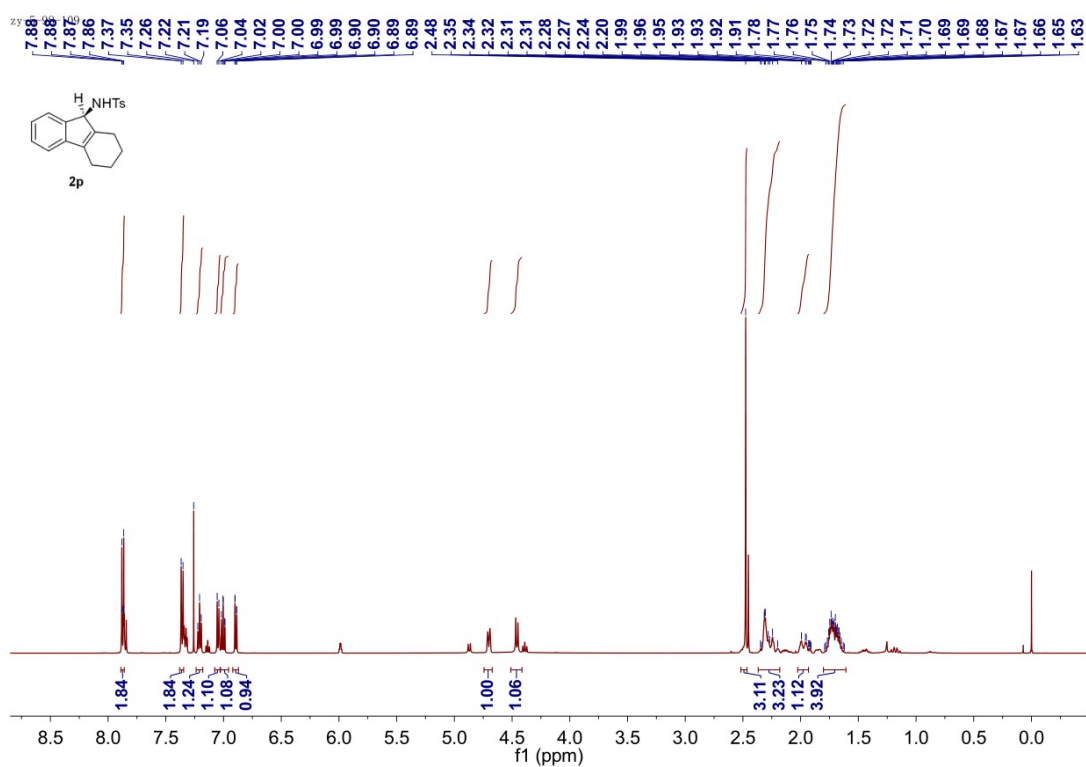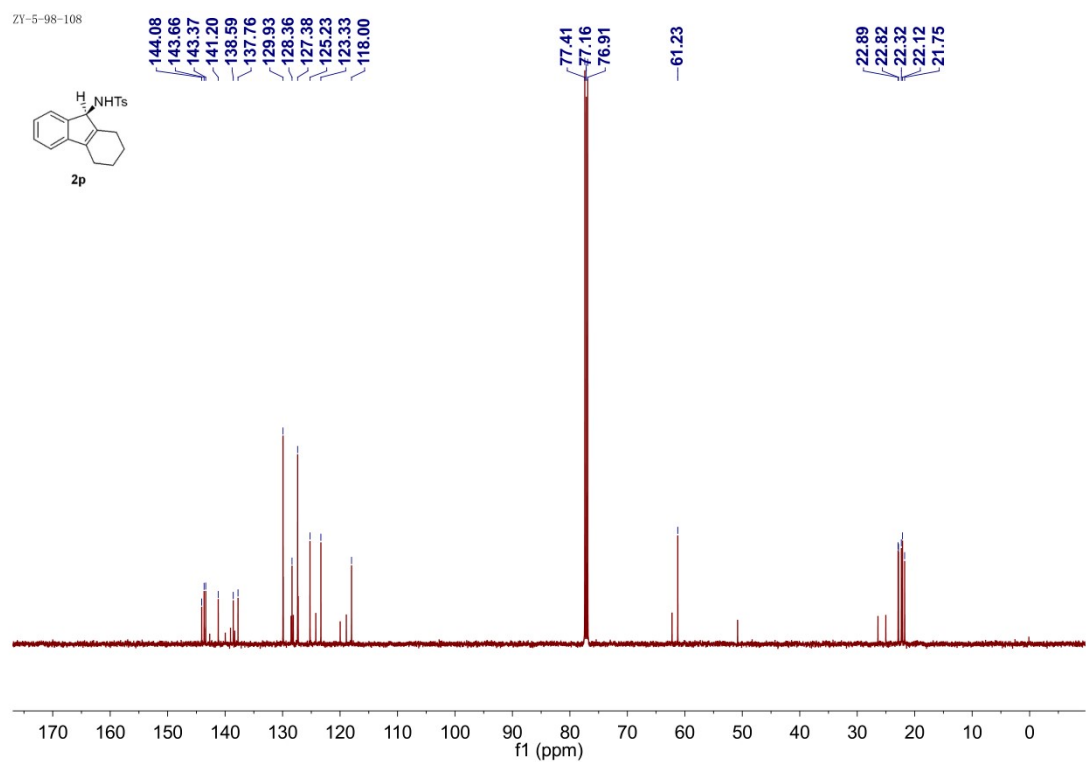

(S)-N-(2,7-dimethyl-1H-inden-1-yl)-4-methylbenzenesulfonamide (**2p**)

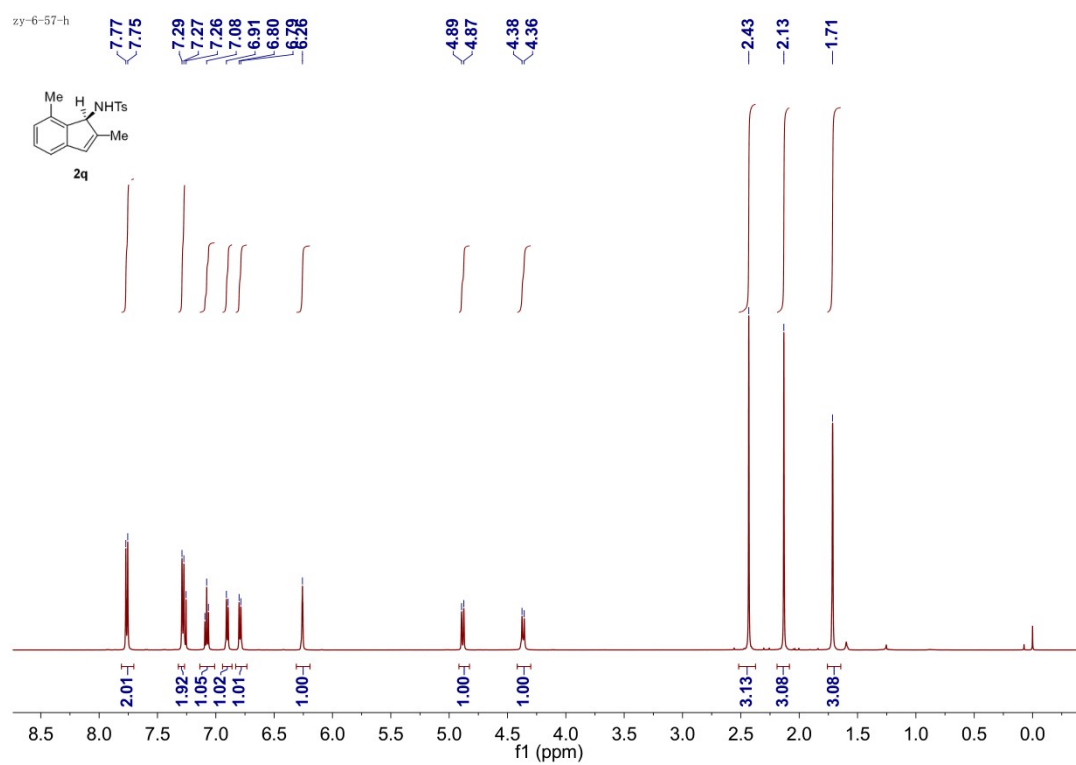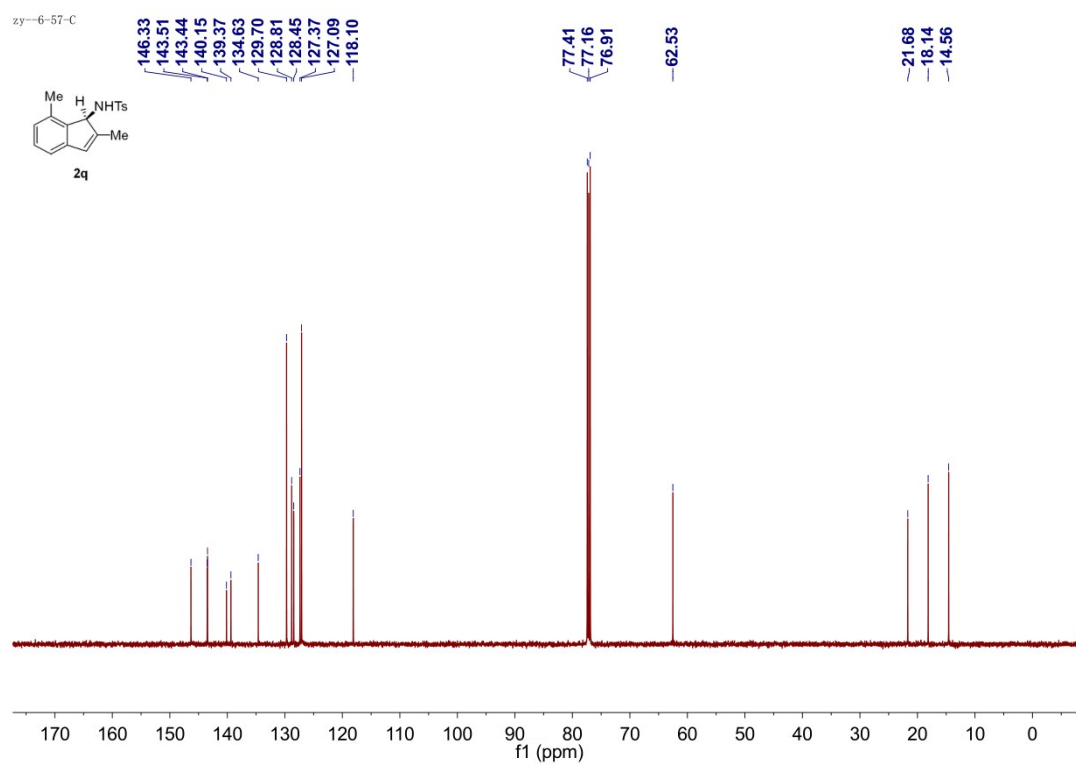

(S)-N-(2,5-dimethyl-1H-inden-1-yl)-4-methylbenzenesulfonamide (**2r**)

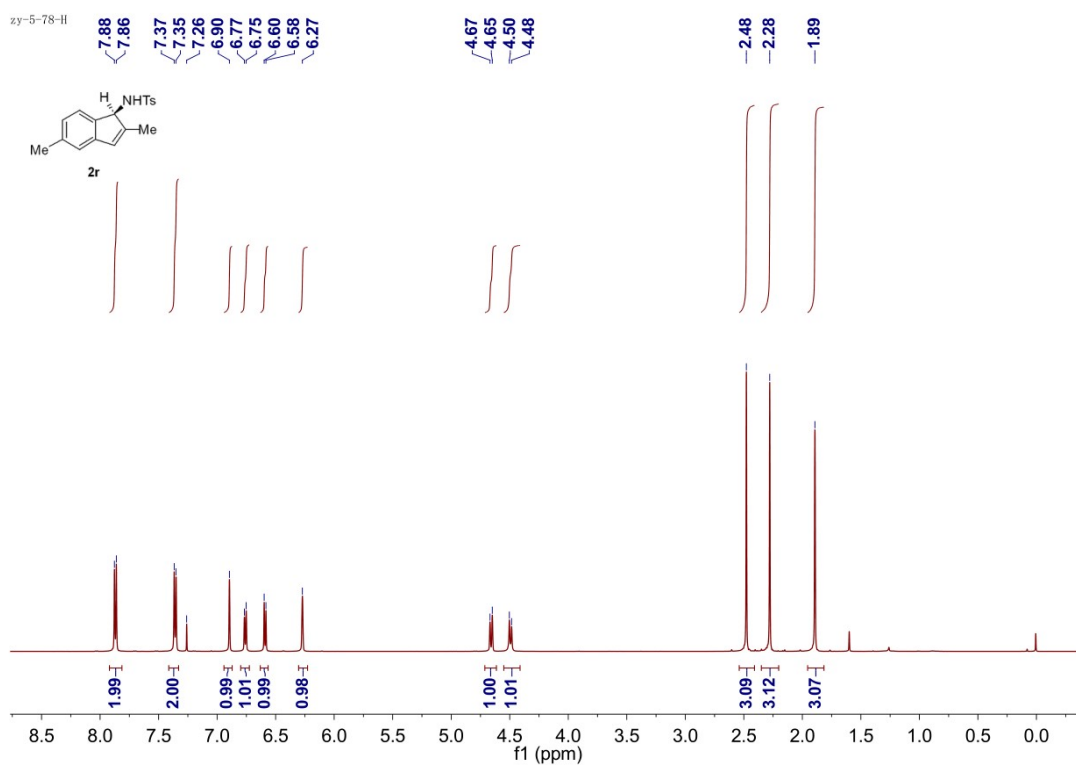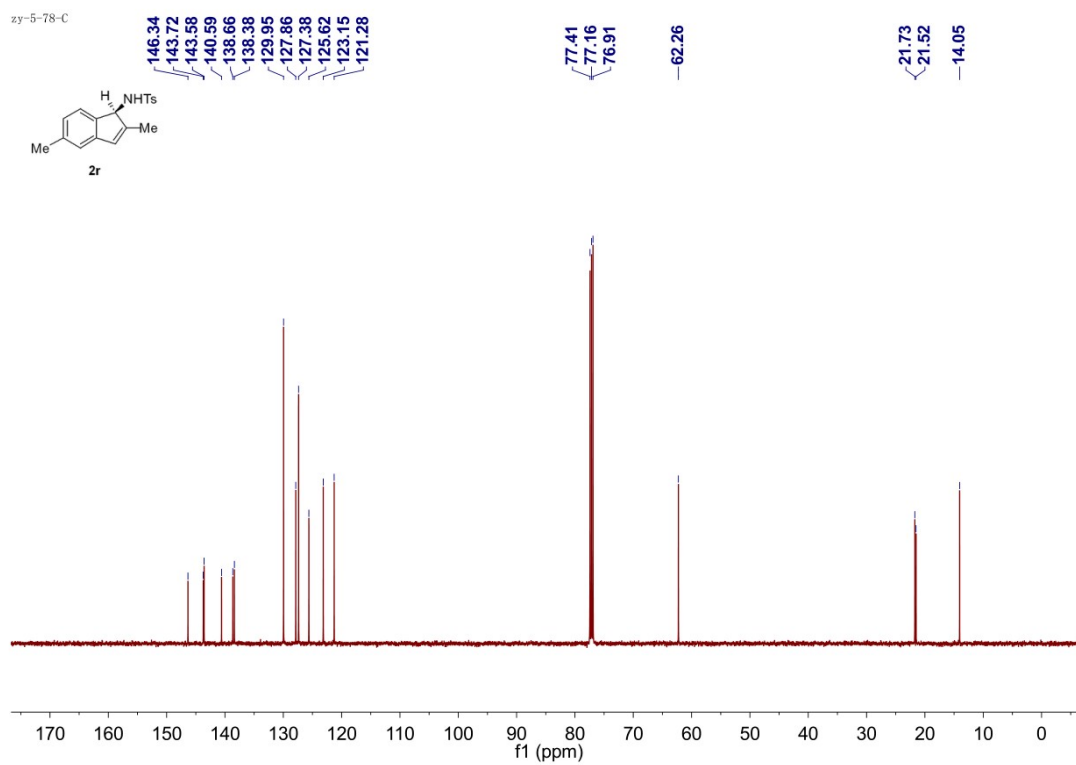

(S)-N-(2,4-dimethyl-1H-inden-1-yl)-4-methylbenzenesulfonamide (**2s**)

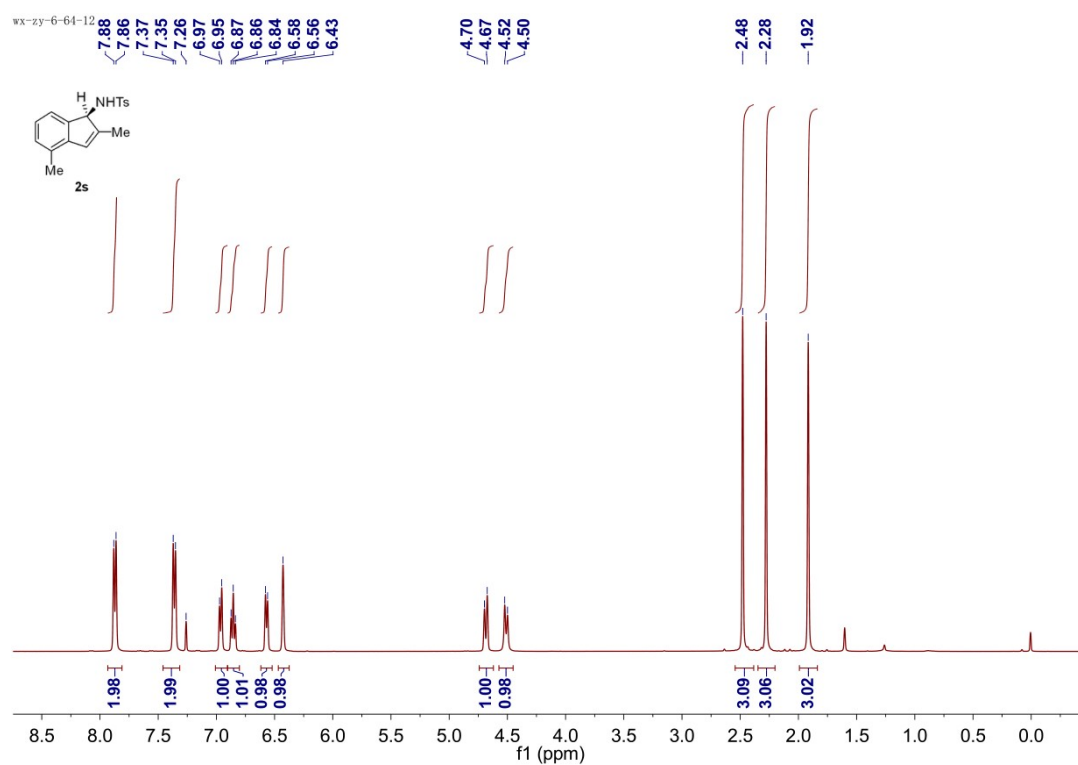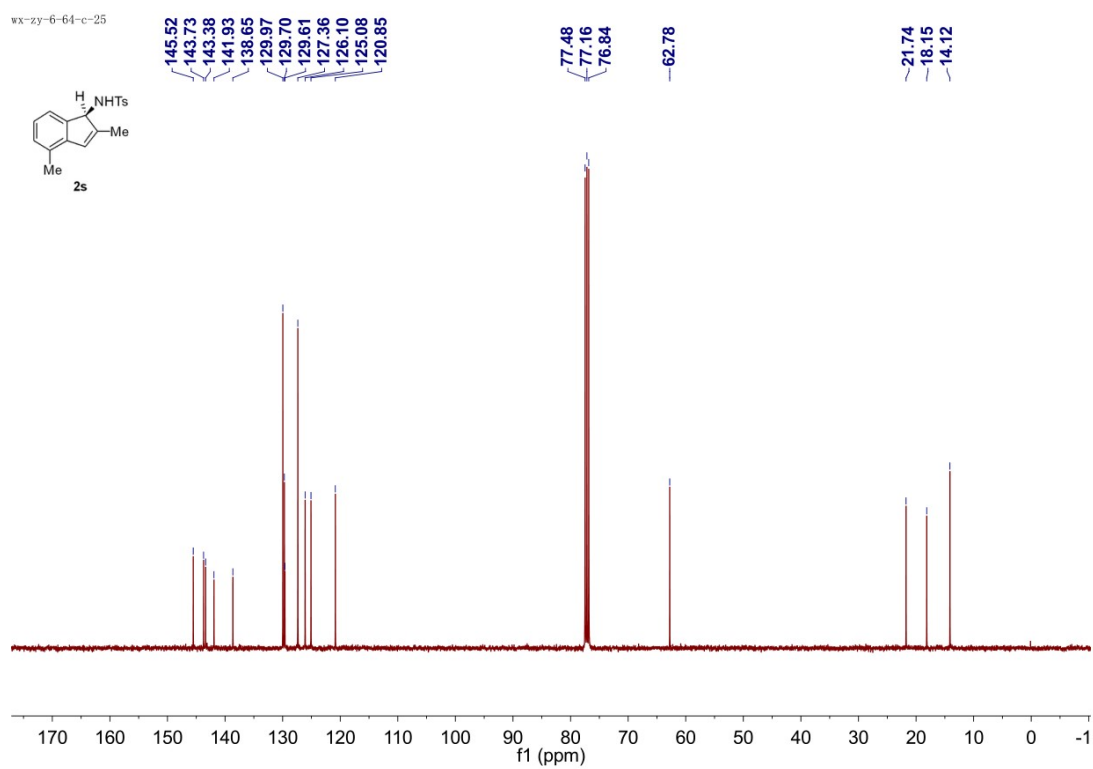

(S)-N-(5-fluoro-2-methyl-1H-inden-1-yl)-4-methylbenzenesulfonamide (**2t**)

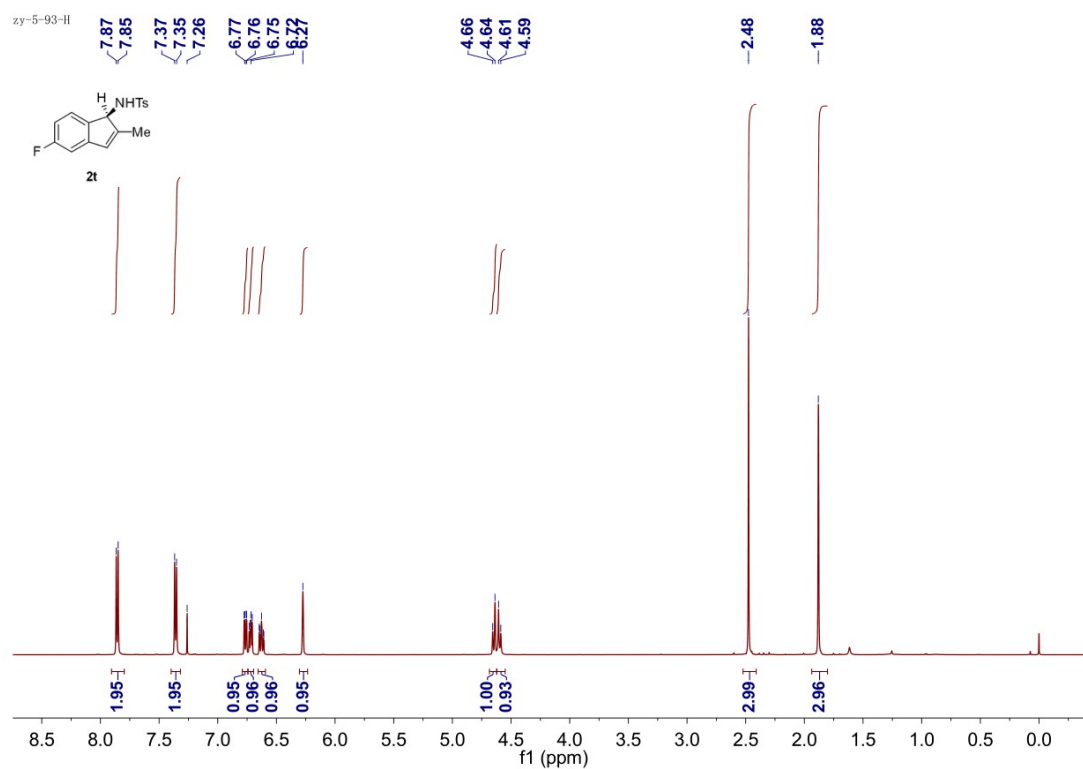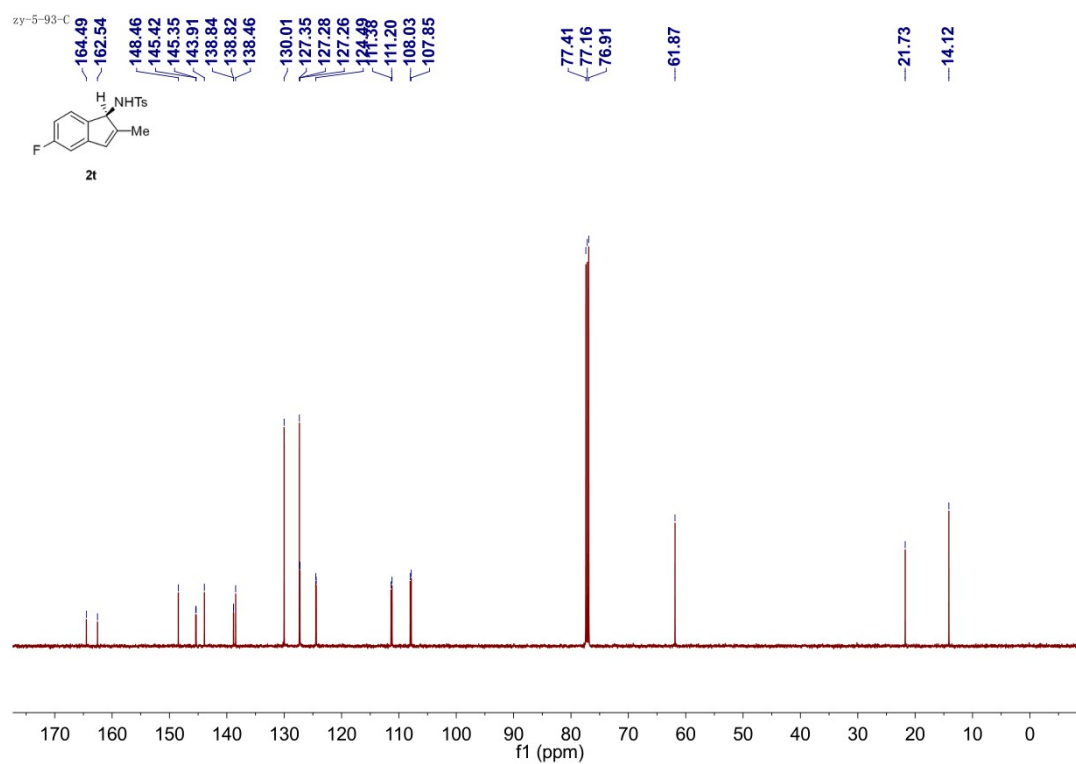

zy-5-93-F

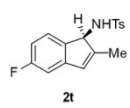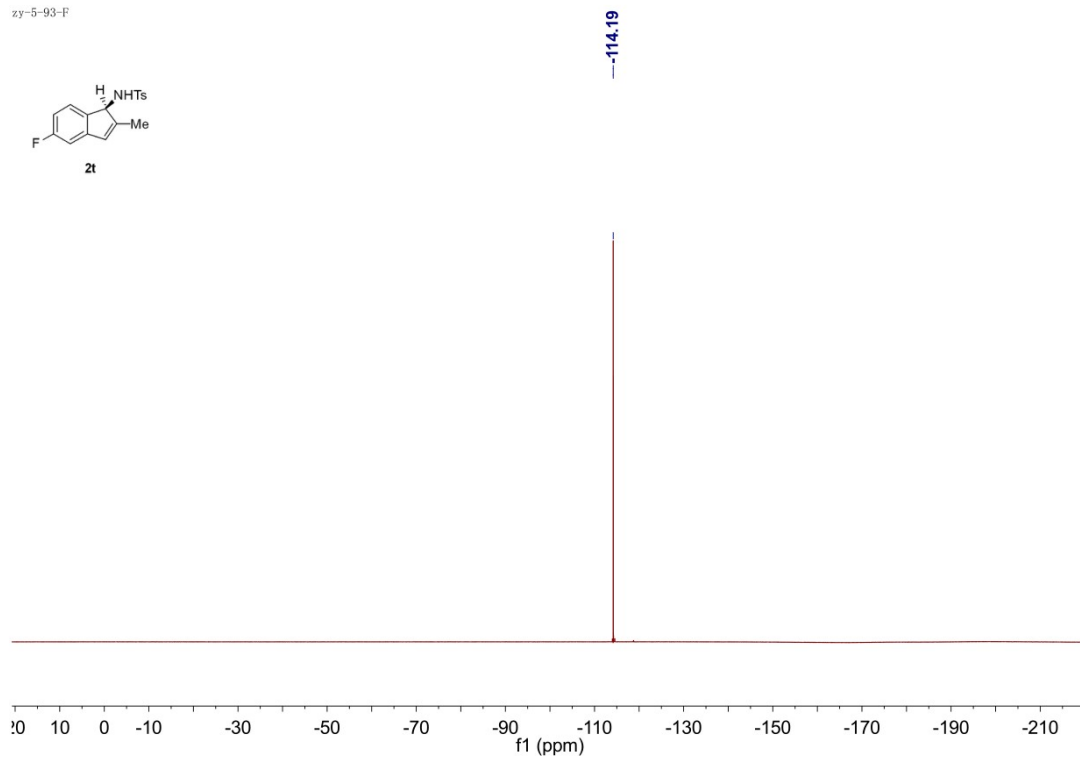



(S)-N-(5-methoxy-2-methyl-1H-inden-1-yl)-4-methylbenzenesulfonamide (**2u**)

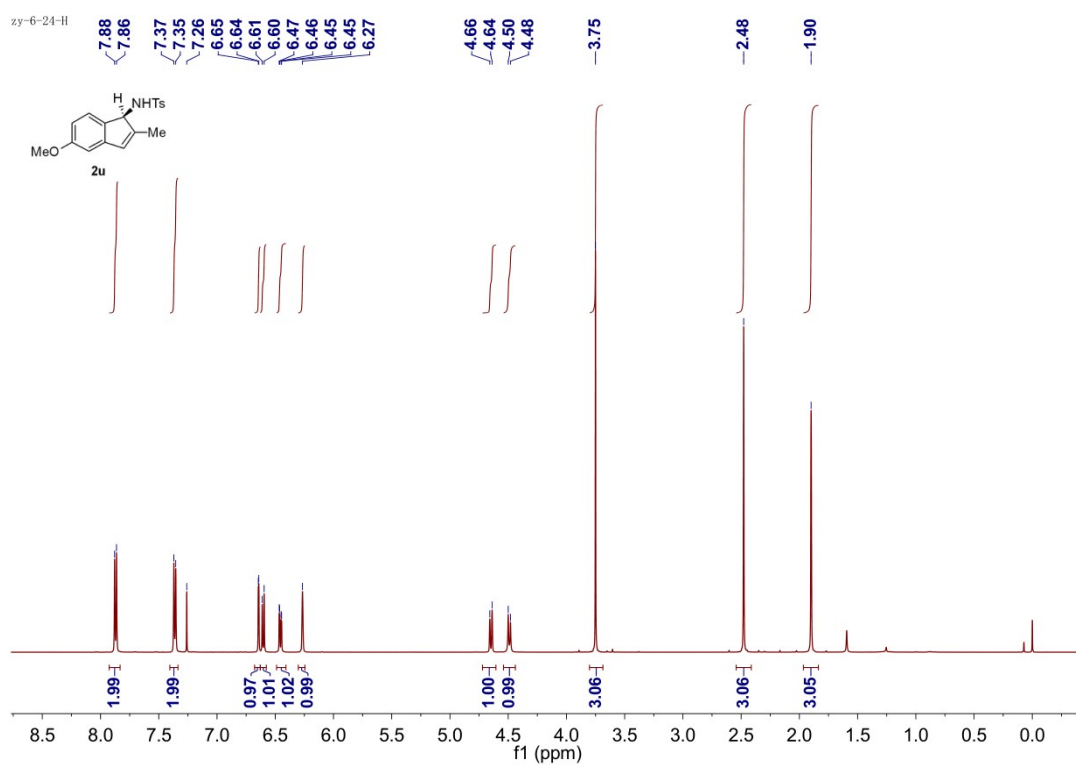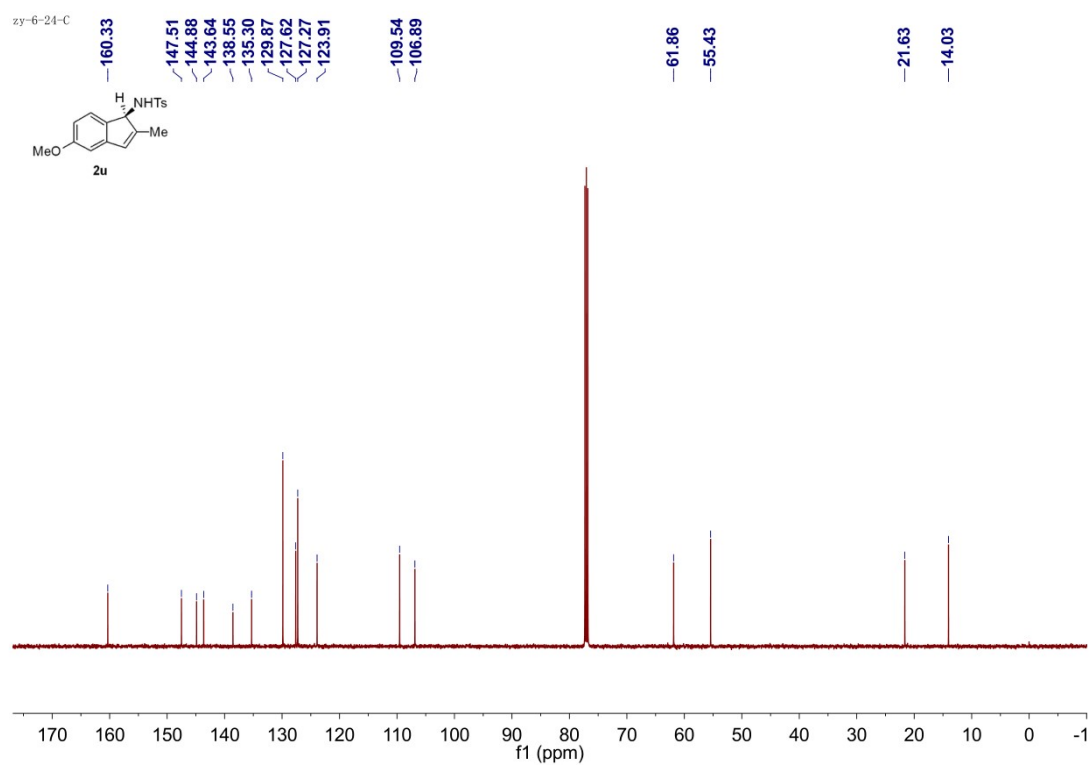

(S)-N-(5-chloro-2-methyl-1H-inden-1-yl)-4-methylbenzenesulfonamide (**2v**)

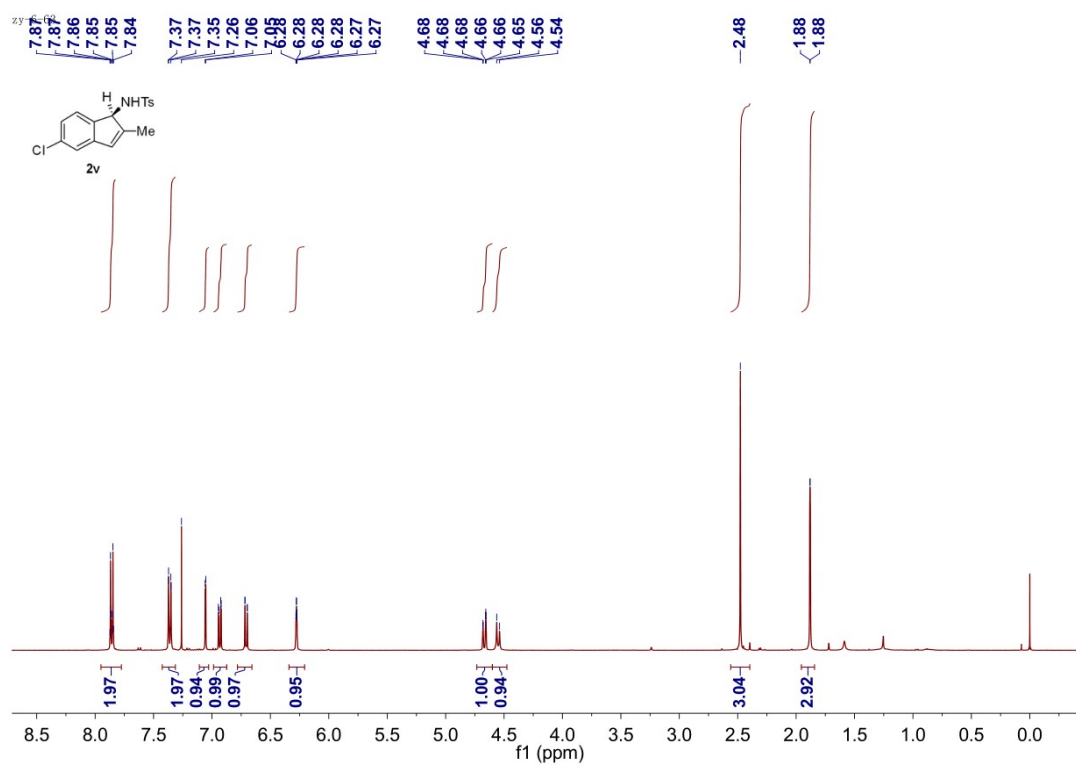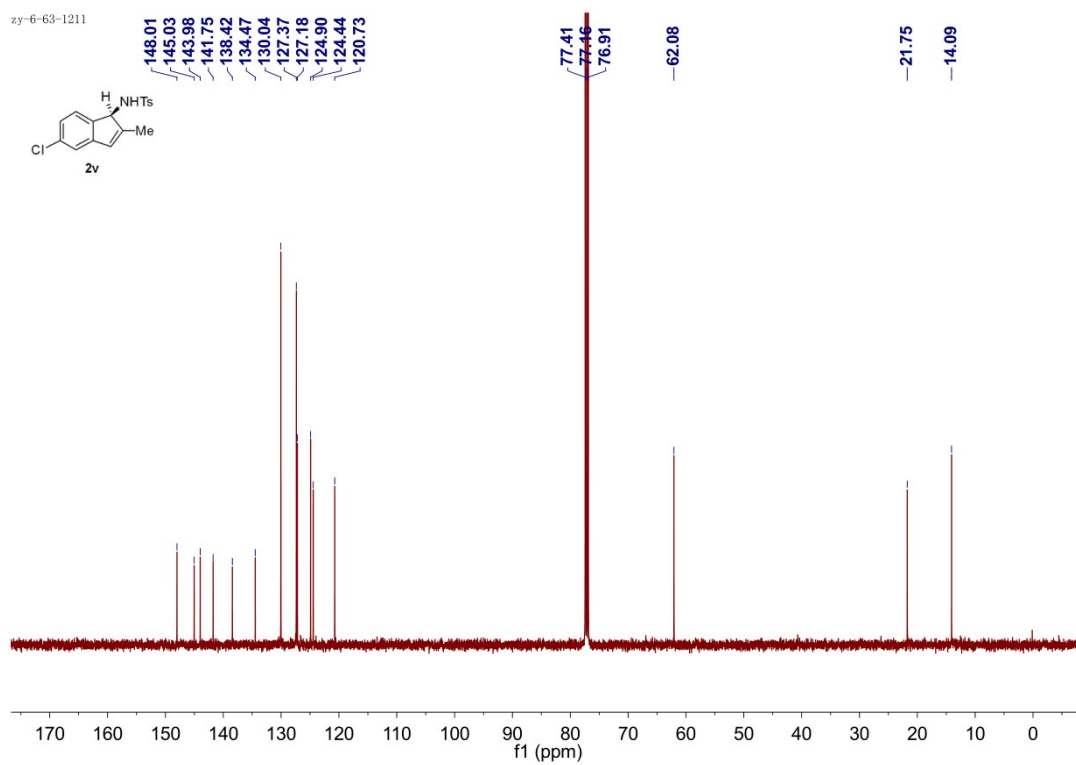

(S)-4-methyl-N-(6-methyl-5H-indeno[5,6-d][1,3]dioxol-5-yl)benzenesulfonamide (**2w**)

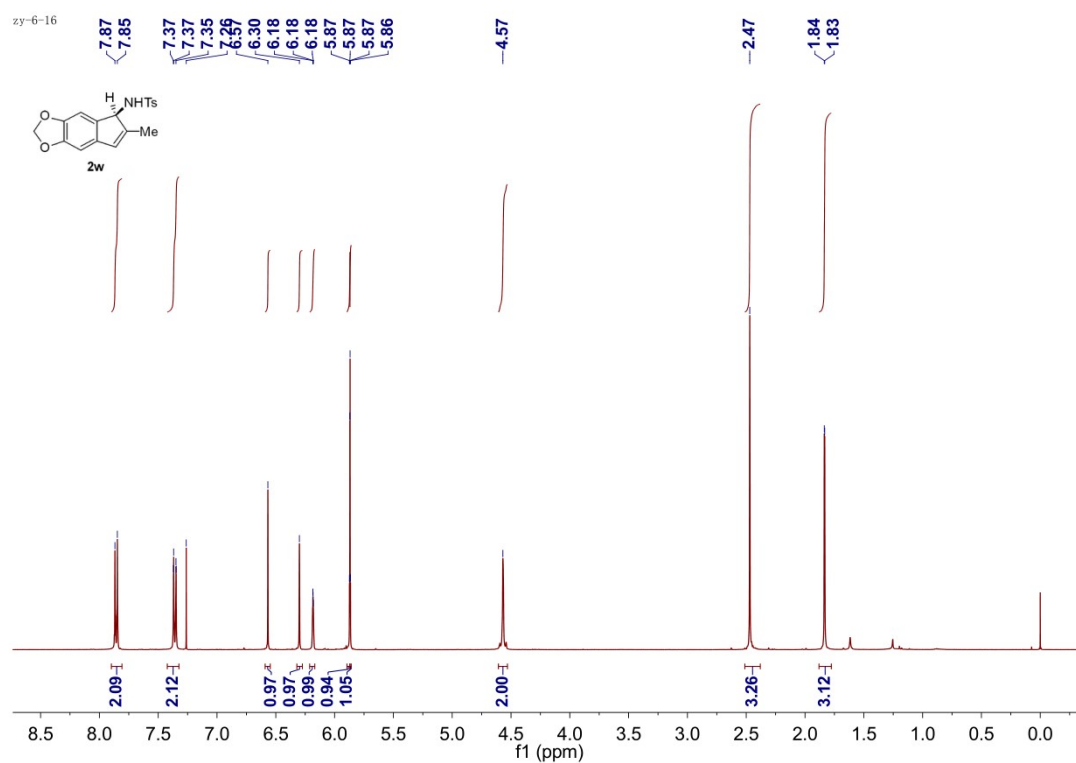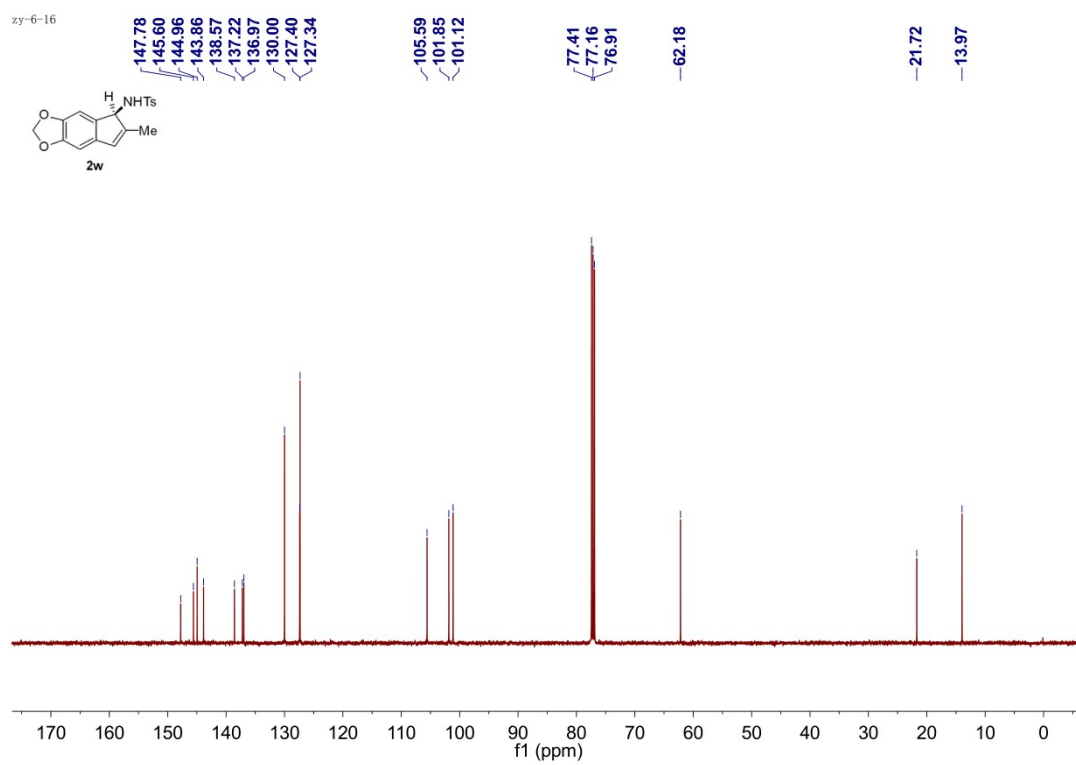

4-methyl-N-(((6R,7S,11bS)-6,6a,7,11b-tetrahydroindeno[2,1-c]chromen-7-yl)benzenesulfonamide (**4a**)

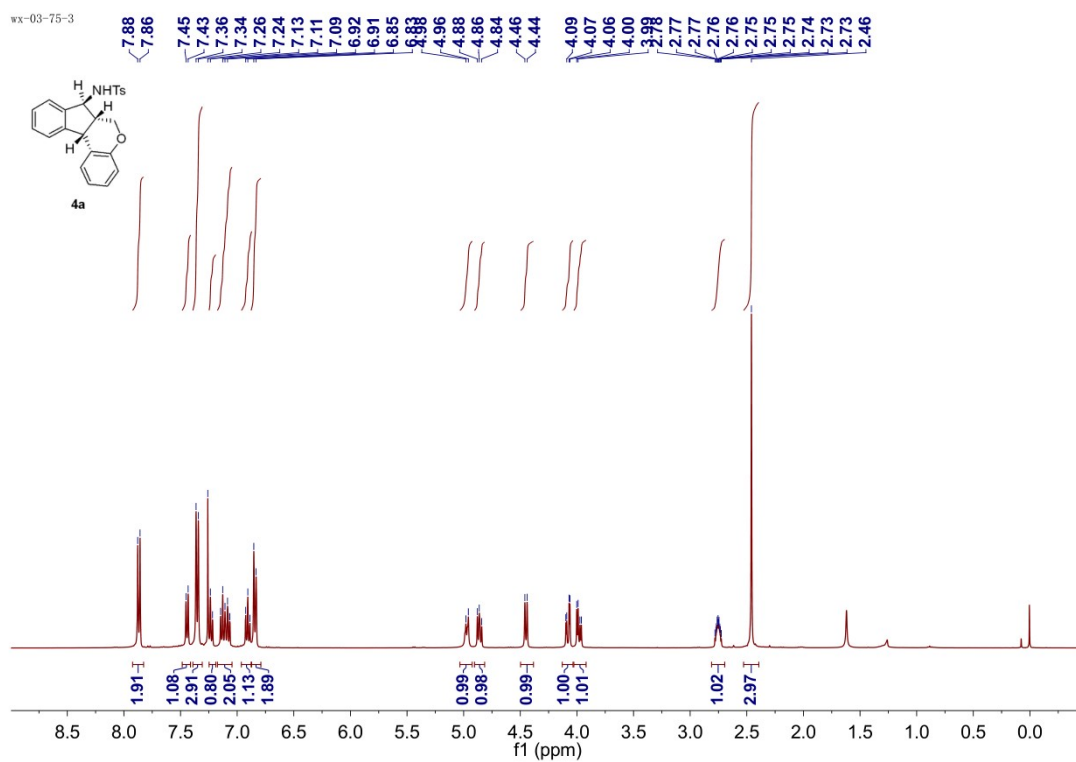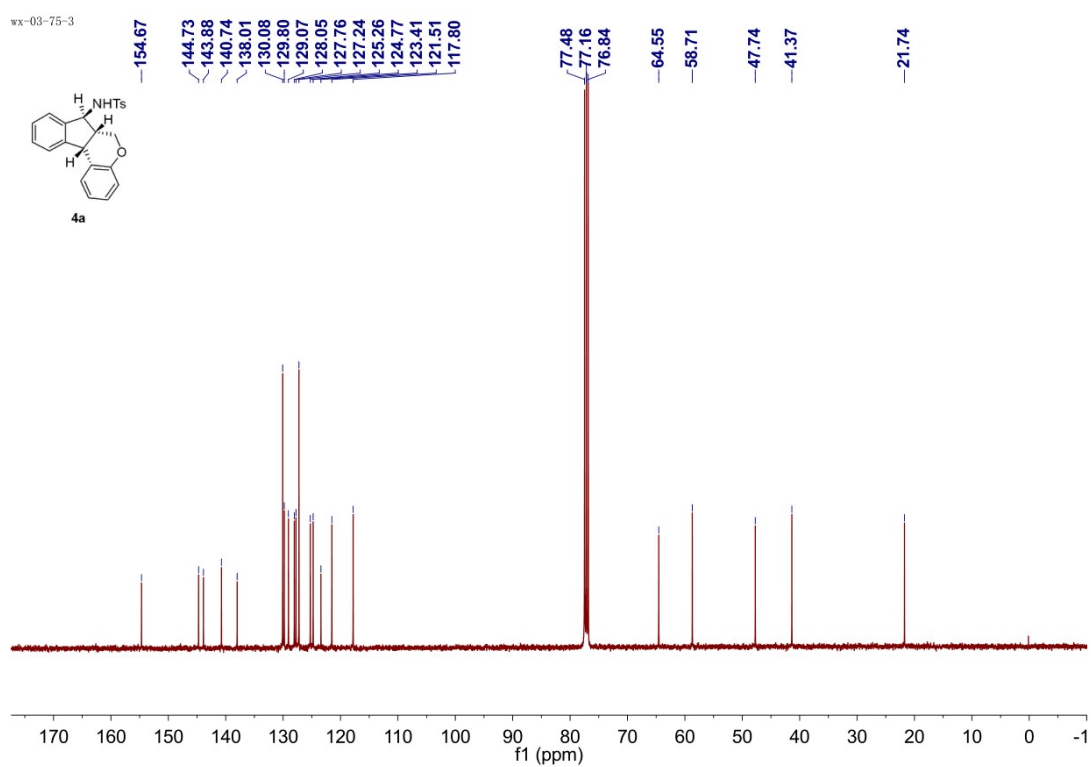

4-methyl-N-(((6aR,7S,11bS)-2-methyl-6,6a,7,11b-tetrahydroindeno[2,1-c]chromen-7-yl)benzenesulfonamide (**4b**)

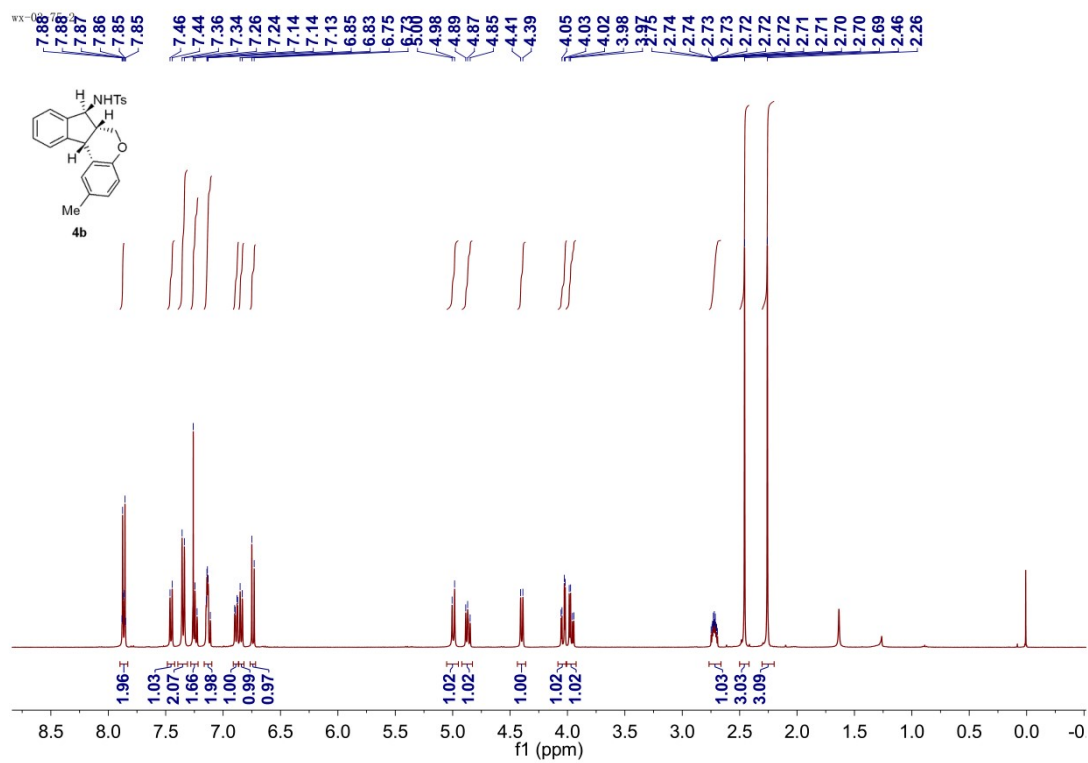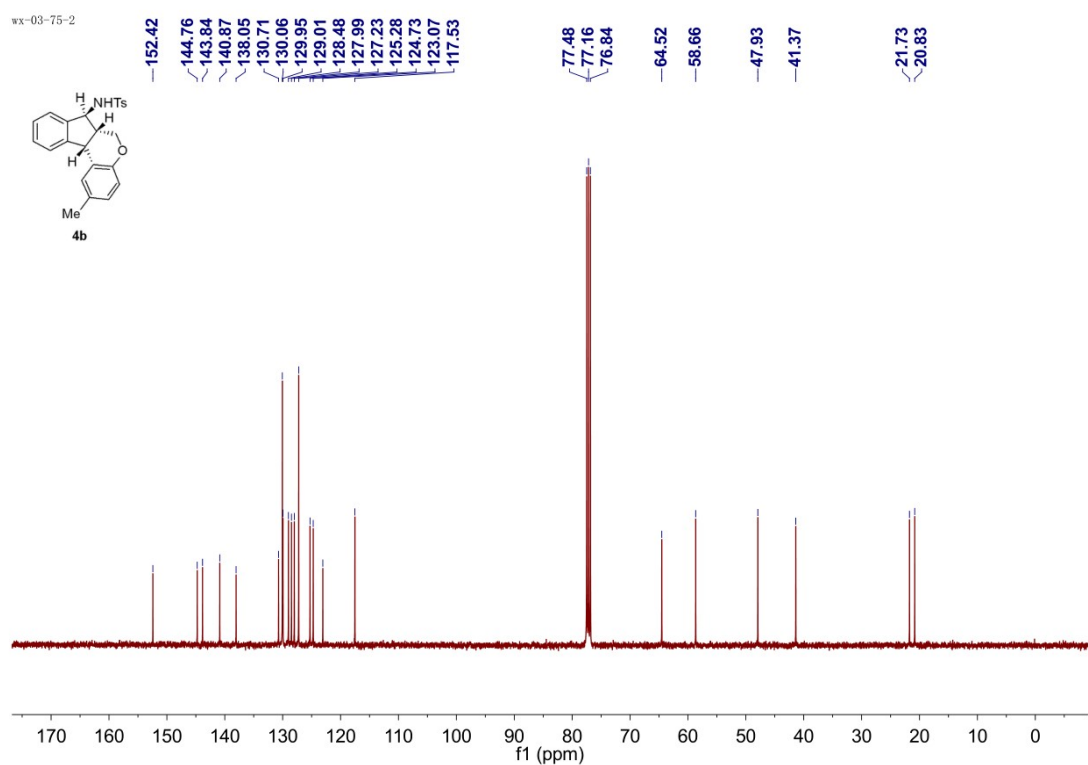

N-(((6aR,7S,11bS)-2-ethyl-6,6a,7,11b-tetrahydroindeno[2,1-c]chromen-7-yl)-4-methylbenzenesulfonamide (**4c**)

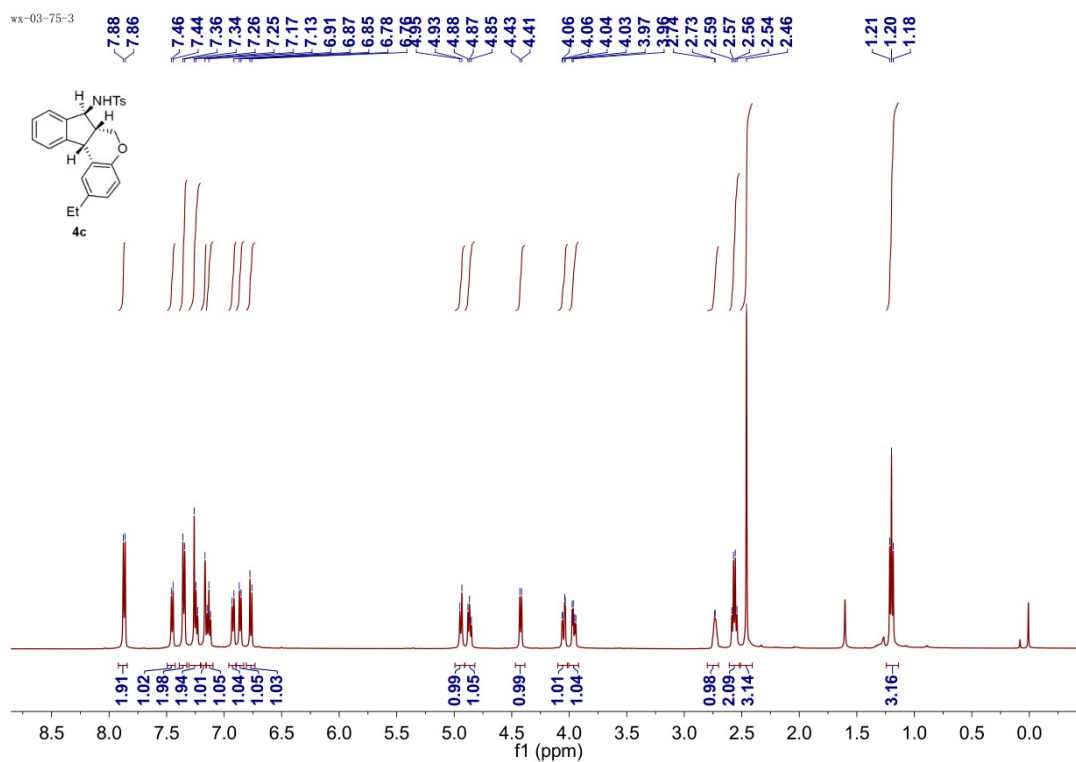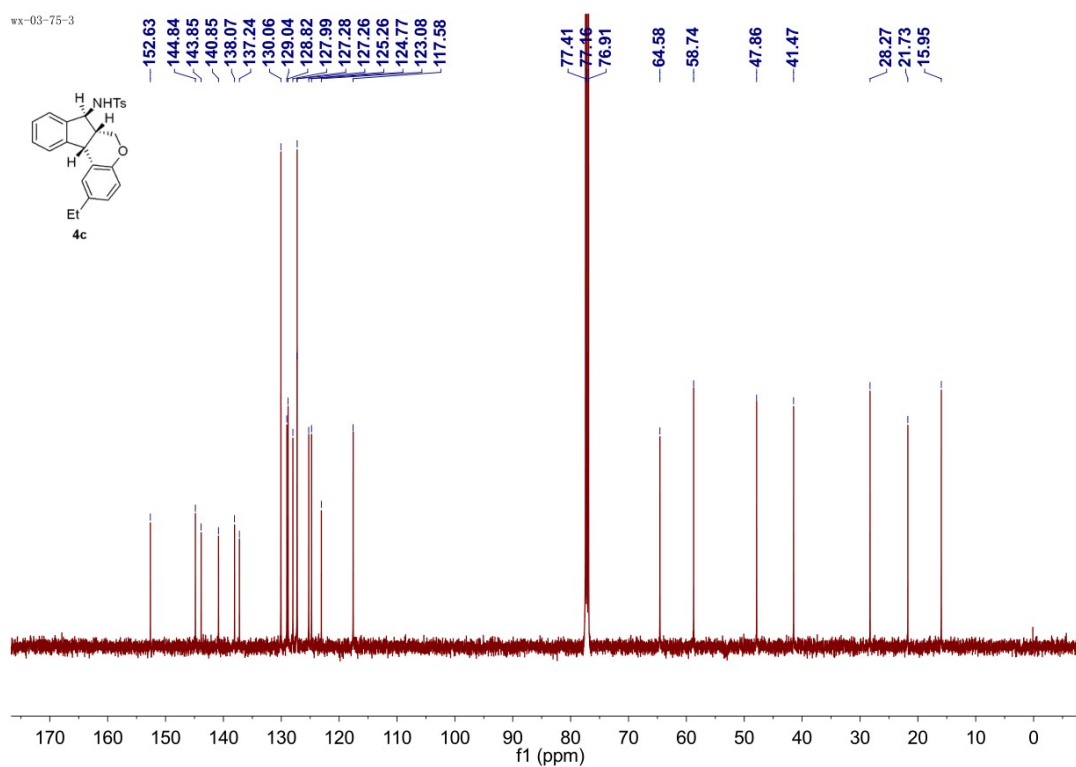

N-(((6aR,7S,11bS)-2-fluoro-6,6a,7,11b-tetrahydroindeno[2,1-c]chromen-7-yl)-4-methylbenzenesulfonamide (**4d**)

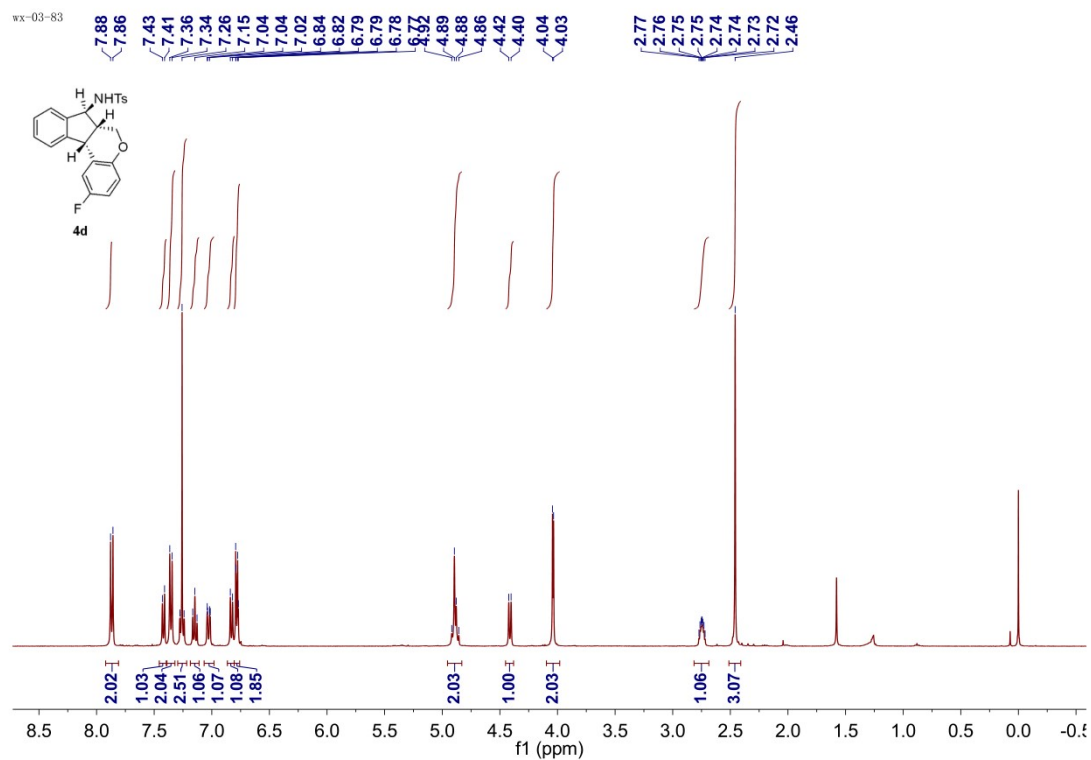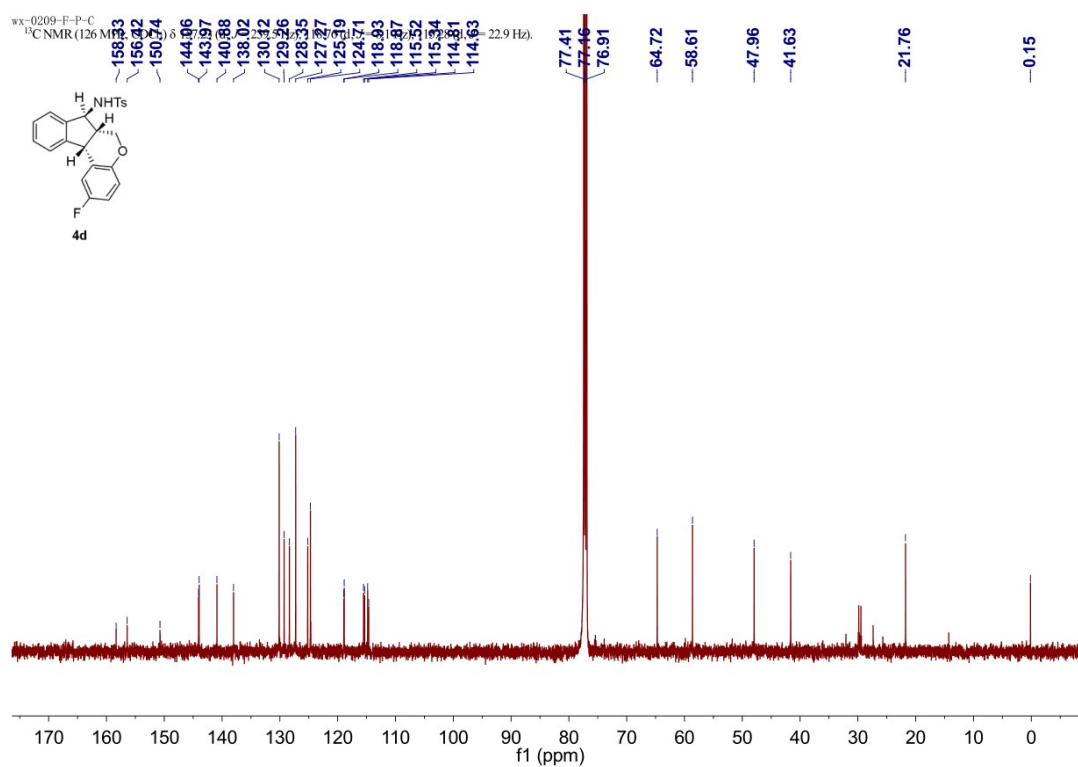

wx-0209-F-HCF

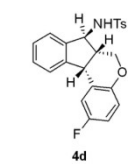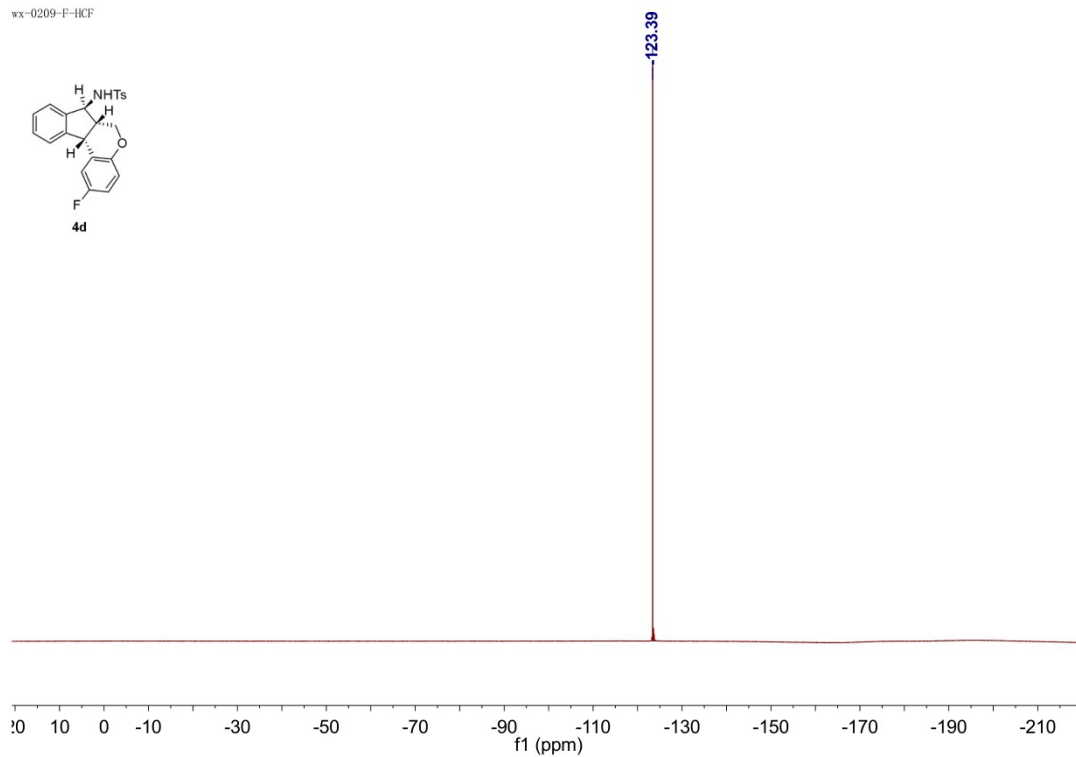



N-((6aR,7S,11bS)-2-methoxy-6,6a,7,11b-tetrahydroindeno[2,1-c]chromen-7-yl)-4-methylbenzenesulfonamide (**4e**)

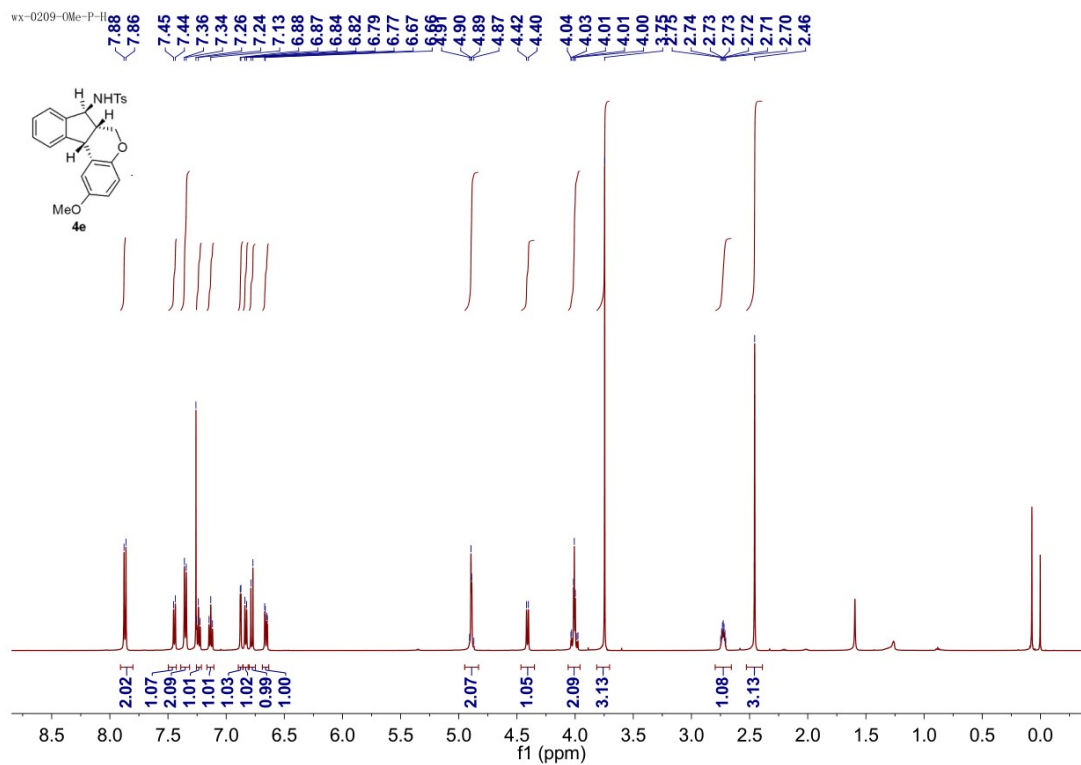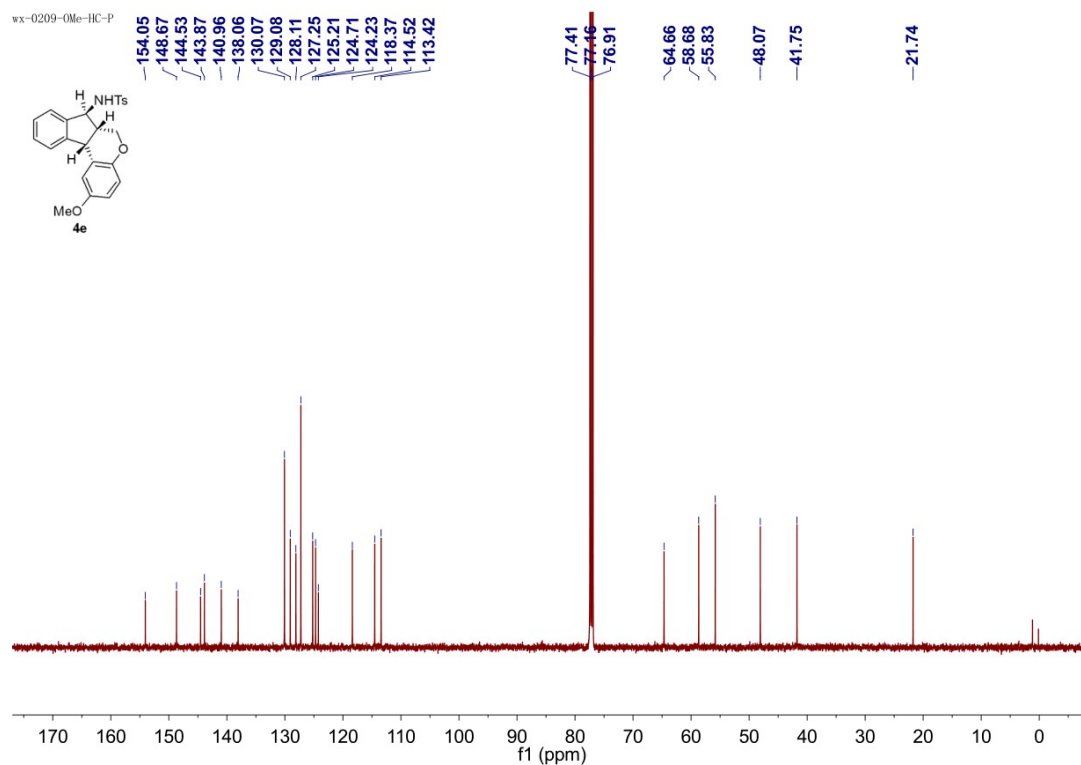

(S)-N-(2,3-dihydro-1H-inden-1-yl)-4-methylbenzenesulfonamide (**5**)

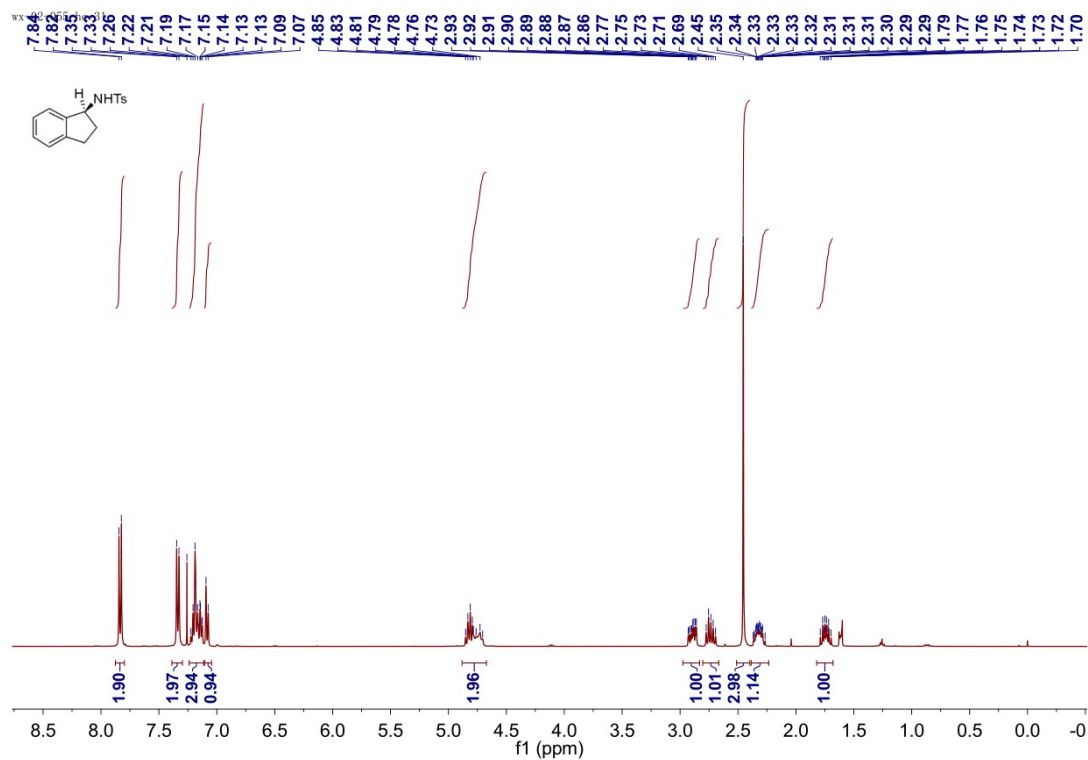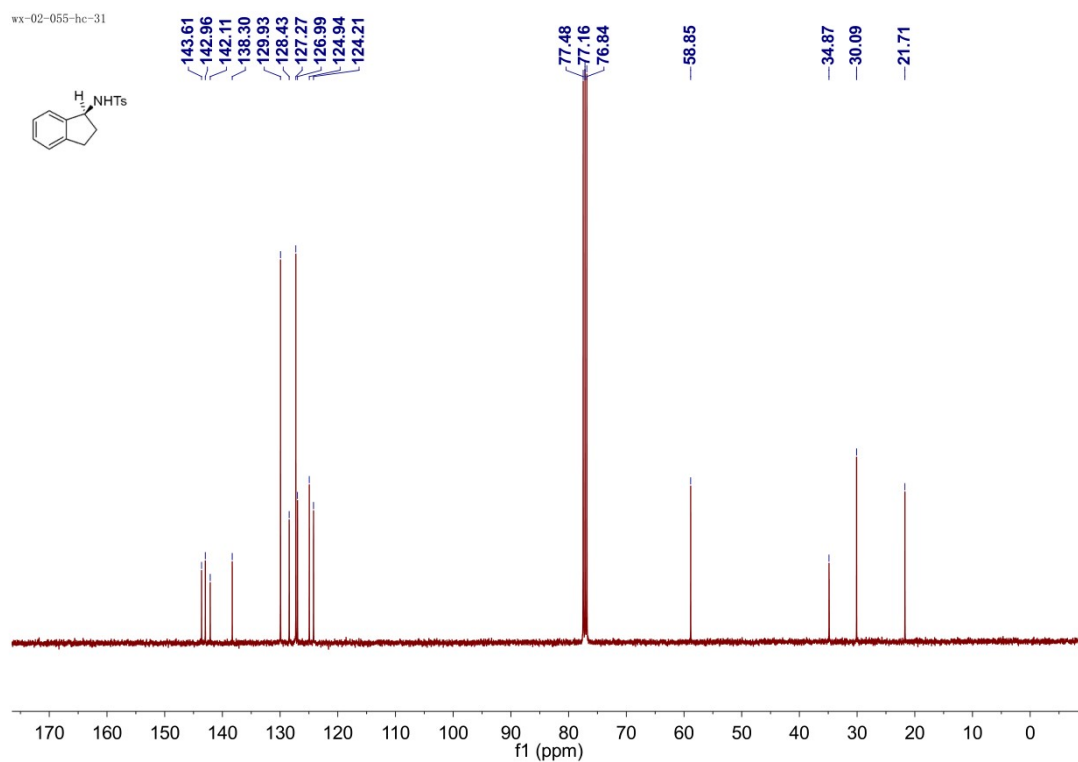

(S)-2,3-dihydro-1H-inden-1-amine (**6**)

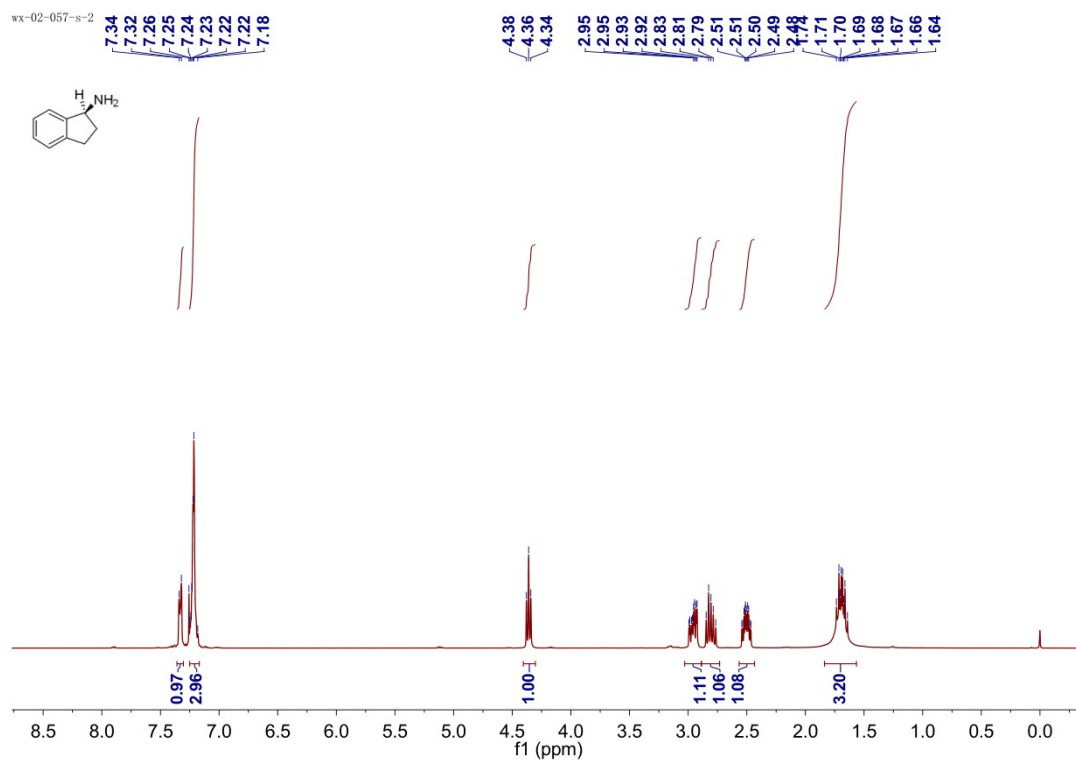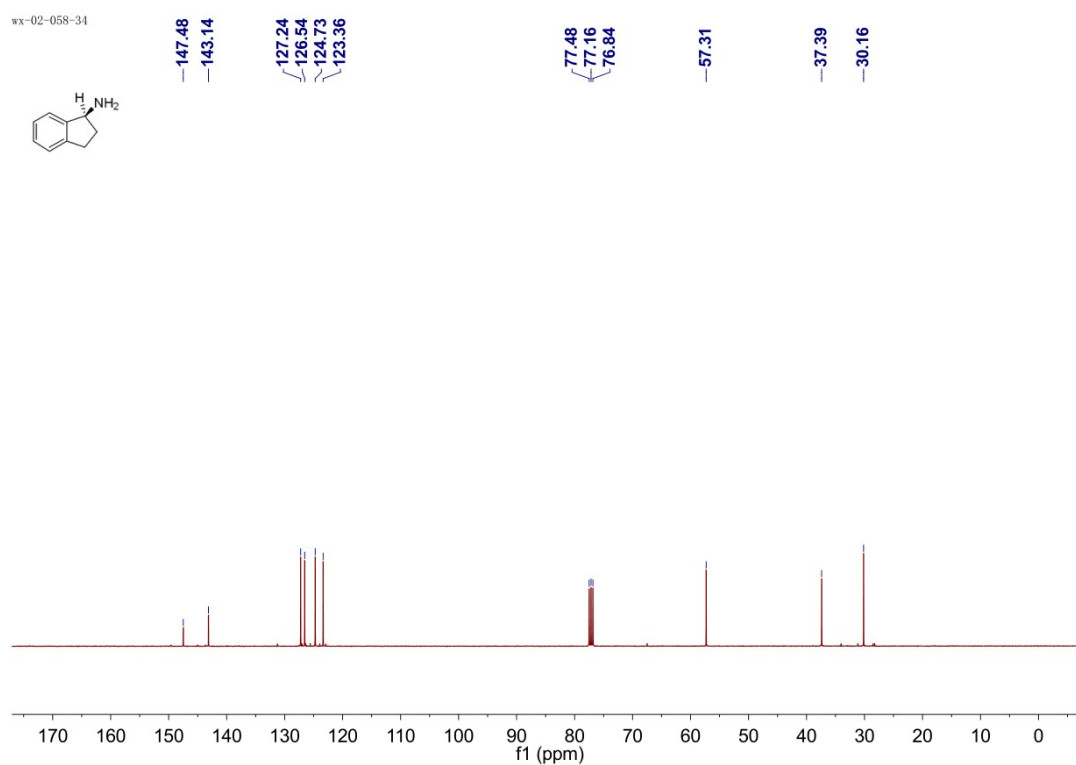

(S)-N-(prop-2-yn-1-yl)-2,3-dihydro-1H-inden-1-amine (**7**)

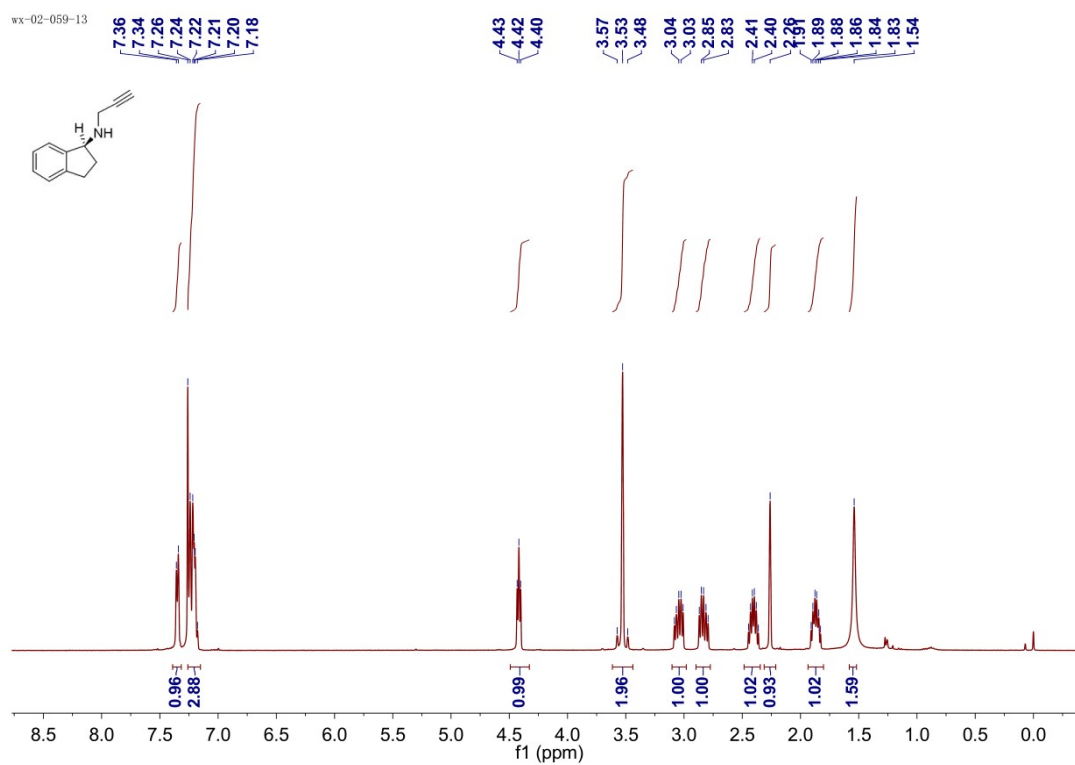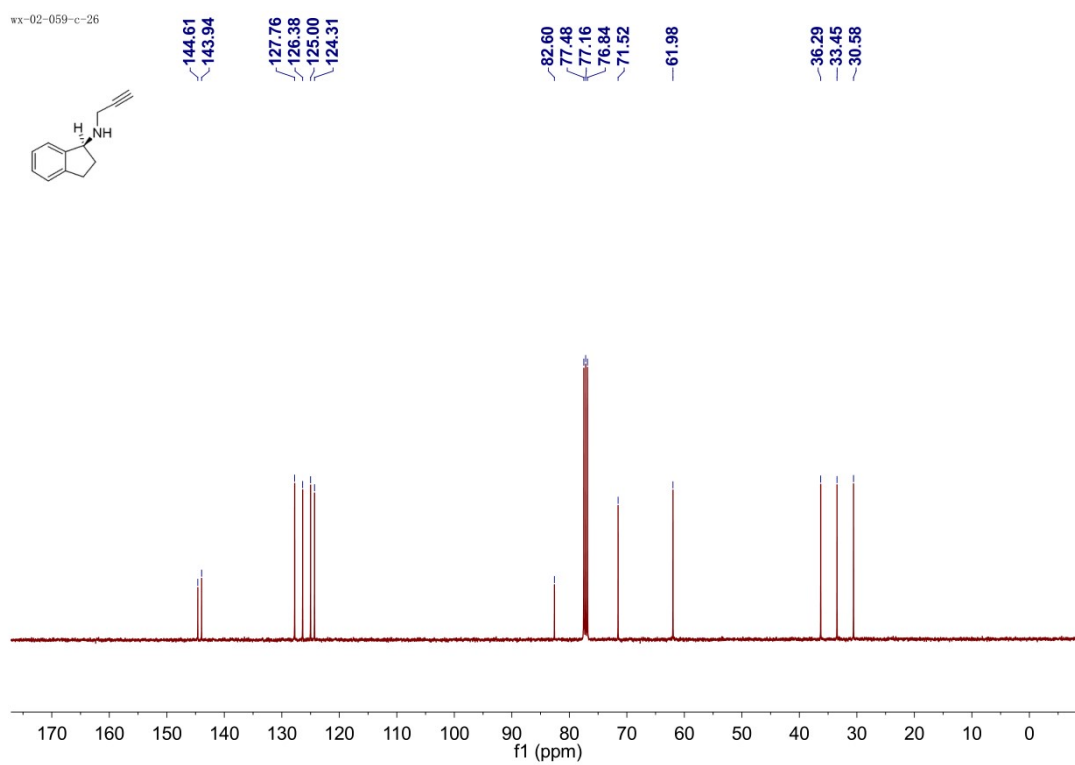

## 12. HPLC spectra for products, 5, 6 and 7.

(S)-4-methyl-N-(2-methyl-1H-inden-1-yl)benzenesulfonamide (**2a**)

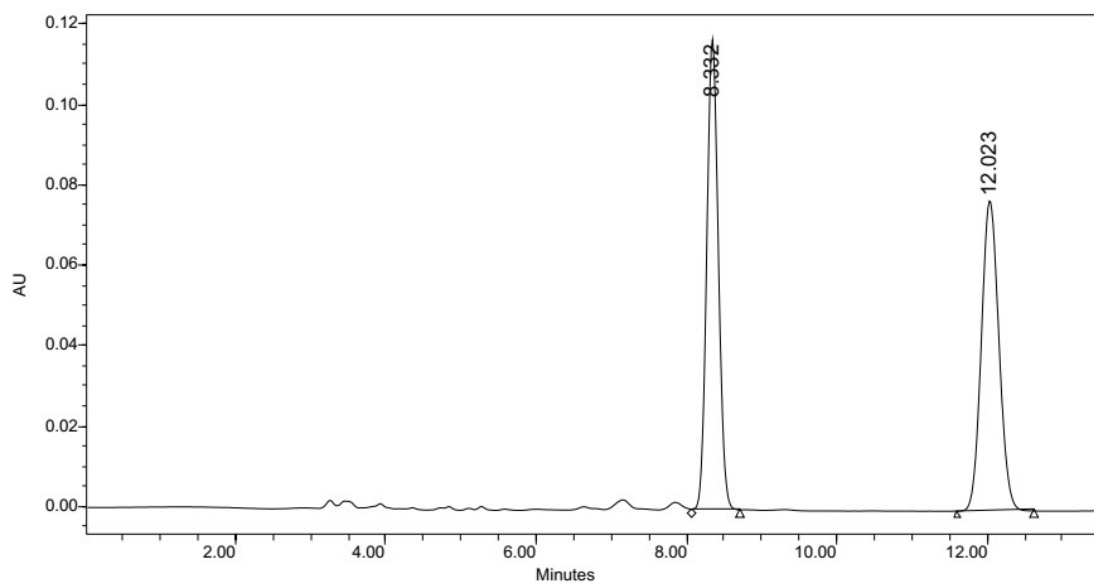

|   | RT<br>(min) | Area<br>(V*sec) | % Area | Height<br>(V) | %<br>Height |
|---|-------------|-----------------|--------|---------------|-------------|
| 1 | 8.332       | 1254317         | 50.01  | 116830        | 60.22       |
| 2 | 12.023      | 1253720         | 49.99  | 77189         | 39.78       |

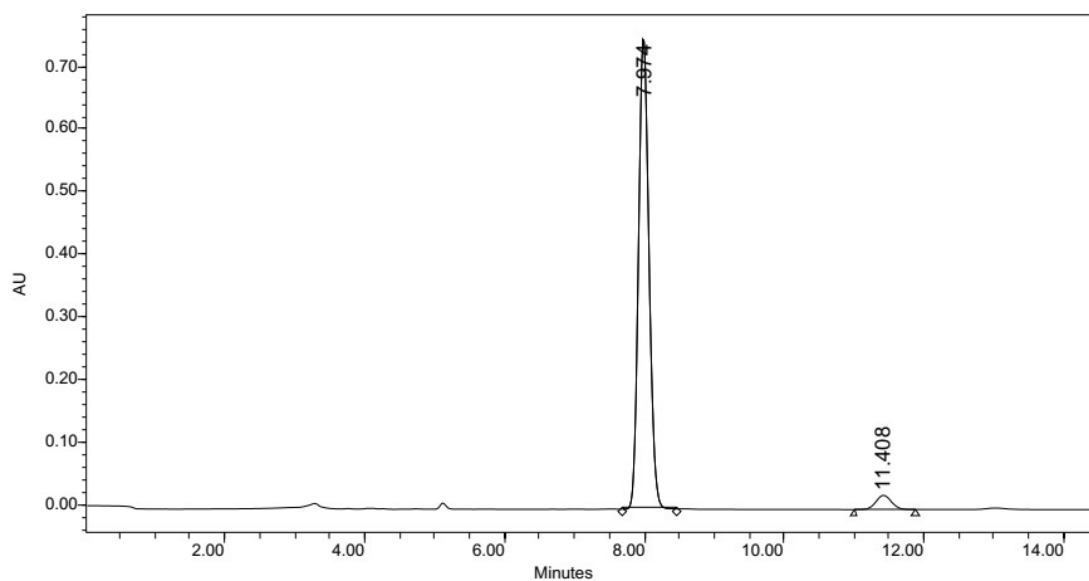

|   | RT<br>(min) | Area<br>(V*sec) | % Area | Height<br>(V) | %<br>Height |
|---|-------------|-----------------|--------|---------------|-------------|
| 1 | 7.974       | 7857792         | 95.75  | 753865        | 97.09       |
| 2 | 11.408      | 349055          | 4.25   | 22631         | 2.91        |

(S)-N-(1H-inden-1-yl)-4-methylbenzenesulfonamide (**2b**)

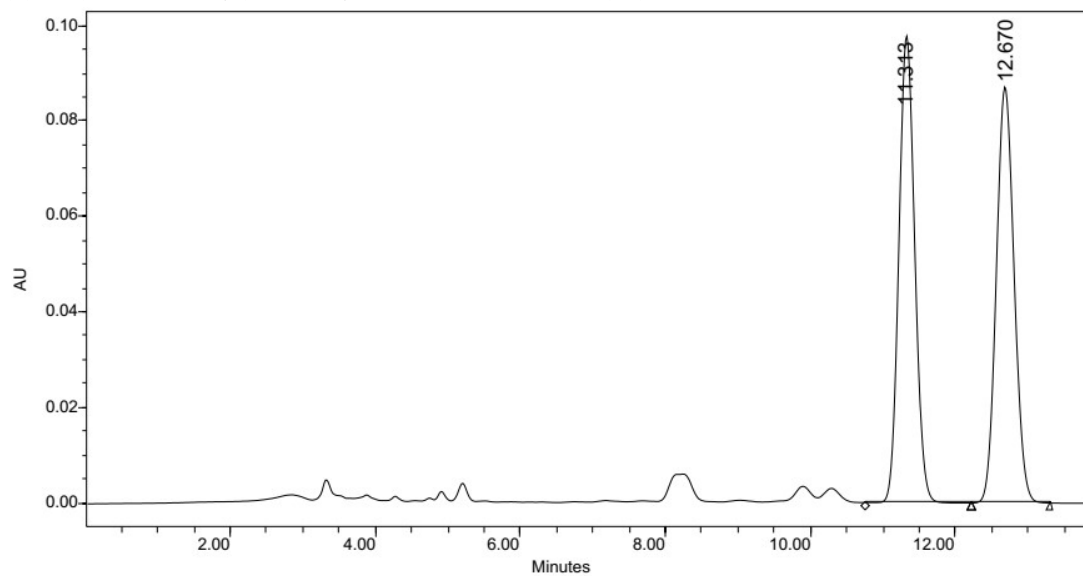

|   | RT<br>(min) | Area<br>( V*sec) | % Area | Height<br>( V) | %<br>Height |
|---|-------------|------------------|--------|----------------|-------------|
| 1 | 11.313      | 1486314          | 50.00  | 97789          | 52.89       |
| 2 | 12.670      | 1486031          | 50.00  | 87116          | 47.11       |

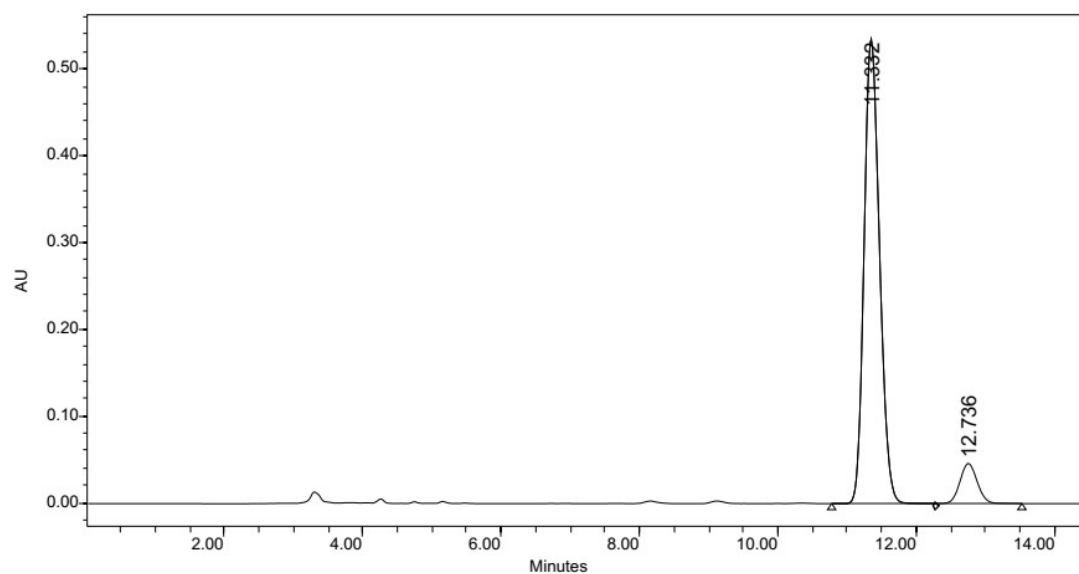

|   | RT<br>(min) | Area<br>( V*sec) | % Area | Height<br>( V) | %<br>Height |
|---|-------------|------------------|--------|----------------|-------------|
| 1 | 11.332      | 8307523          | 91.17  | 535794         | 92.06       |
| 2 | 12.736      | 805025           | 8.83   | 46218          | 7.94        |

(R)-4-methyl-N-(2-phenyl-1H-inden-1-yl)benzenesulfonamide (**2c**)

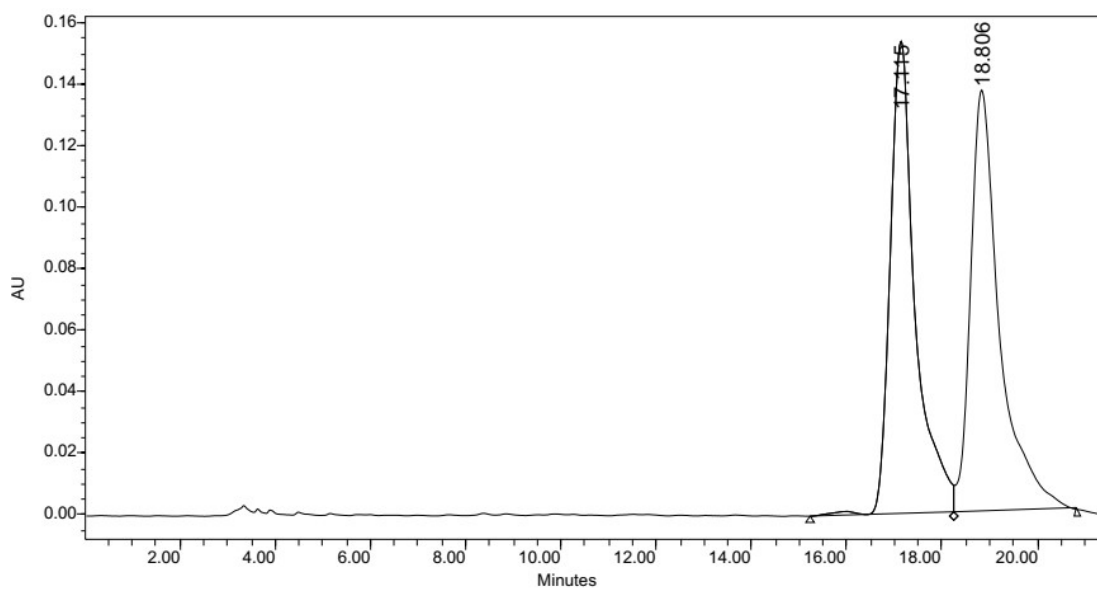

|   | RT<br>(min) | Area<br>( V*sec) | % Area | Height<br>( V) | % Height |
|---|-------------|------------------|--------|----------------|----------|
| 1 | 17.115      | 5654668          | 49.13  | 153692         | 52.83    |
| 2 | 18.806      | 5853770          | 50.87  | 137246         | 47.17    |

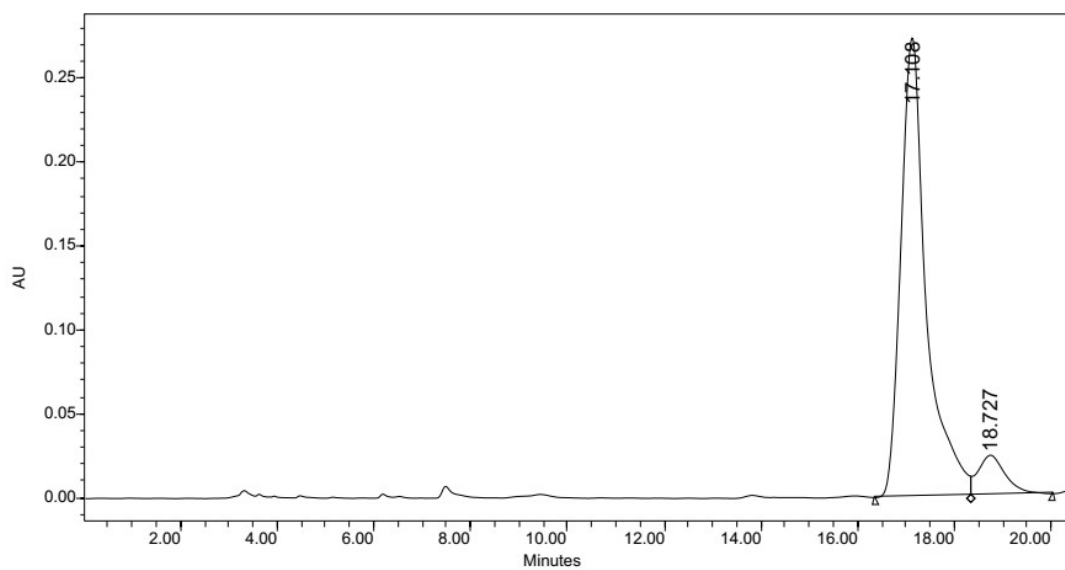

|   | RT<br>(min) | Area<br>( V*sec) | % Area | Height<br>( V) | % Height |
|---|-------------|------------------|--------|----------------|----------|
| 1 | 17.108      | 10039621         | 91.45  | 273722         | 92.02    |
| 2 | 18.727      | 938499           | 8.55   | 23749          | 7.98     |

(S)-N-(2-benzyl-1H-inden-1-yl)-4-methylbenzenesulfonamide (**2d**)

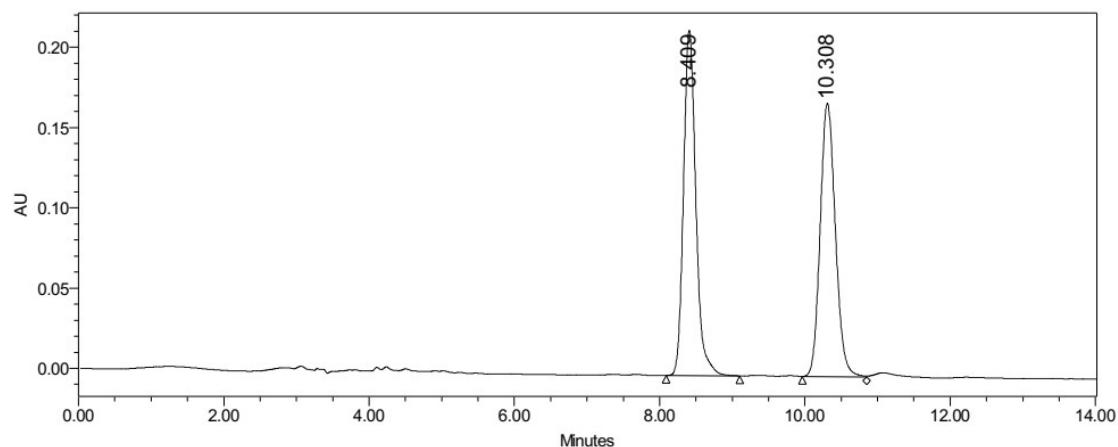

Channel: 2998 Ch1 254nm@4.8nm; Processed Channel: 2998 Ch1 254nm@4.8nm; Result Id: 1509;  
Processing Method: 6 22 1 rac

**Processed Channel Descr.: 2998 Ch1 254nm@4.8nm**

|   | Processed Channel Descr. | RT     | Area    | % Area | Height |
|---|--------------------------|--------|---------|--------|--------|
| 1 | 2998 Ch1 254nm@4.8nm     | 8.409  | 2530110 | 50.59  | 214849 |
| 2 | 2998 Ch1 254nm@4.8nm     | 10.308 | 2471068 | 49.41  | 170246 |

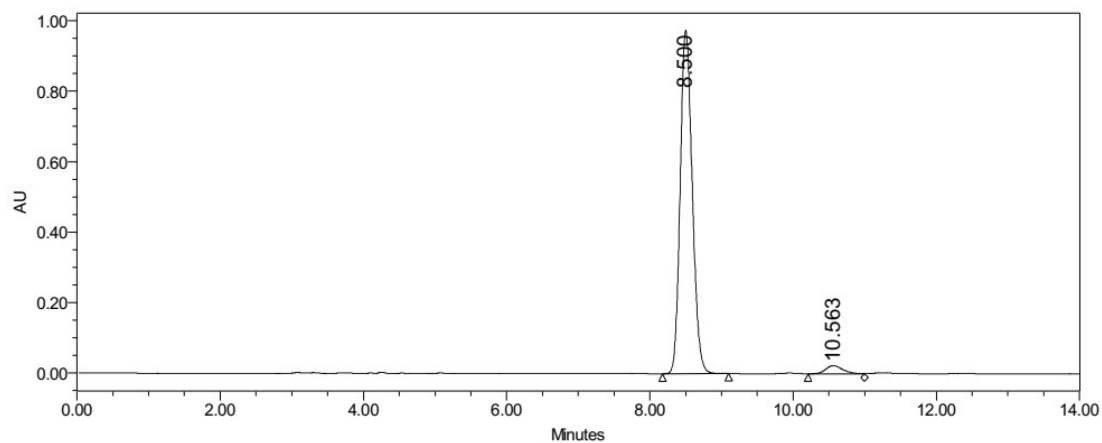

Channel: 2998 Ch1 254nm@4.8nm; Processed Channel: 2998 Ch1 254nm@4.8nm; Result Id: 1527;  
Processing Method: 6 22 2

**Processed Channel Descr.: 2998 Ch1 254nm@4.8nm**

|   | Processed Channel Descr. | RT     | Area     | % Area | Height |
|---|--------------------------|--------|----------|--------|--------|
| 1 | 2998 Ch1 254nm@4.8nm     | 8.500  | 11373917 | 96.73  | 974414 |
| 2 | 2998 Ch1 254nm@4.8nm     | 10.563 | 384588   | 3.27   | 23282  |



(S)-4-methyl-N-(2-propyl-1H-inden-1-yl)benzenesulfonamide (**2e**)

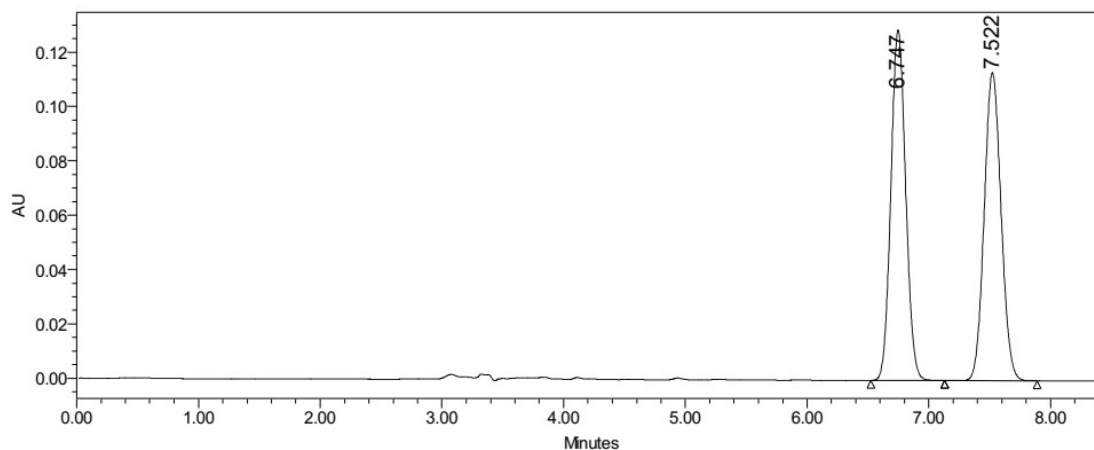

Channel: 2998 Ch1 254nm@4.8nm; Processed Channel: 2998 Ch1 254nm@4.8nm; Result Id: 1515;  
Processing Method: 6 23 1 rac

**Processed Channel Descr.: 2998 Ch1 254nm@4.8nm**

|   | Processed Channel Descr. | RT    | Area    | % Area | Height |
|---|--------------------------|-------|---------|--------|--------|
| 1 | 2998 Ch1 254nm@4.8nm     | 6.747 | 1092434 | 50.01  | 128955 |
| 2 | 2998 Ch1 254nm@4.8nm     | 7.522 | 1092052 | 49.99  | 113402 |

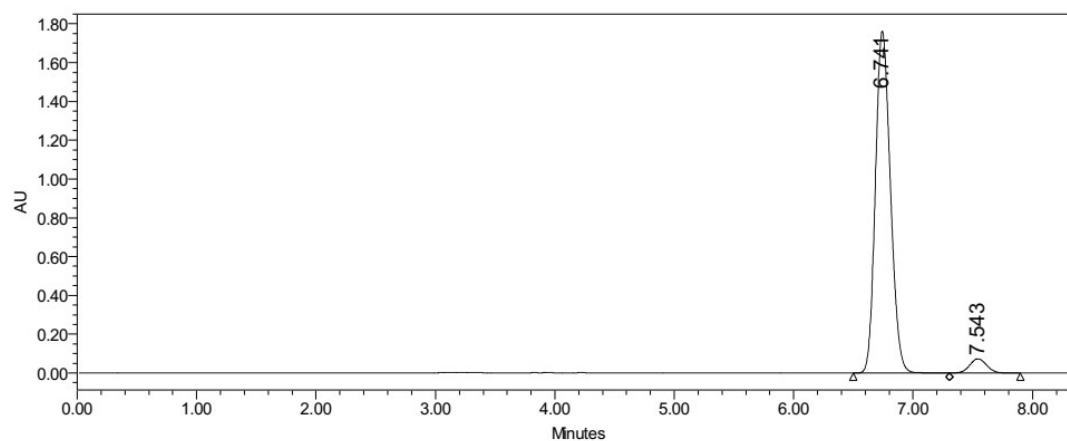

Channel: 2998 Ch1 254nm@4.8nm; Processed Channel: 2998 Ch1 254nm@4.8nm; Result Id: 1529;  
Processing Method: 6 23 2

**Processed Channel Descr.: 2998 Ch1 254nm@4.8nm**

|   | Processed Channel Descr. | RT    | Area     | % Area | Height  |
|---|--------------------------|-------|----------|--------|---------|
| 1 | 2998 Ch1 254nm@4.8nm     | 6.741 | 15416457 | 95.50  | 1761809 |
| 2 | 2998 Ch1 254nm@4.8nm     | 7.543 | 726499   | 4.50   | 73760   |

(S)-N-(2-cyclopropyl-1H-inden-1-yl)-4-methylbenzenesulfonamide (**2f**)

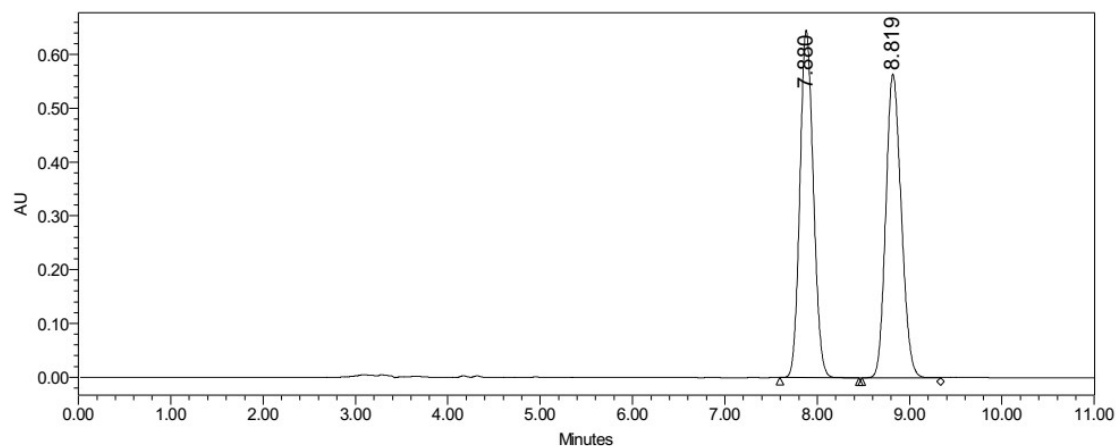

Channel: 2998 Ch1 254nm@4.8nm; Processed Channel: 2998 Ch1 254nm@4.8nm; Result Id: 1989;  
Processing Method: 6 73 1

**Processed Channel Descr.: 2998 Ch1 254nm@4.8nm**

|   | Processed Channel Descr. | RT    | Area    | % Area | Height |
|---|--------------------------|-------|---------|--------|--------|
| 1 | 2998 Ch1 254nm@4.8nm     | 7.880 | 6547608 | 49.87  | 646055 |
| 2 | 2998 Ch1 254nm@4.8nm     | 8.819 | 6581355 | 50.13  | 564755 |

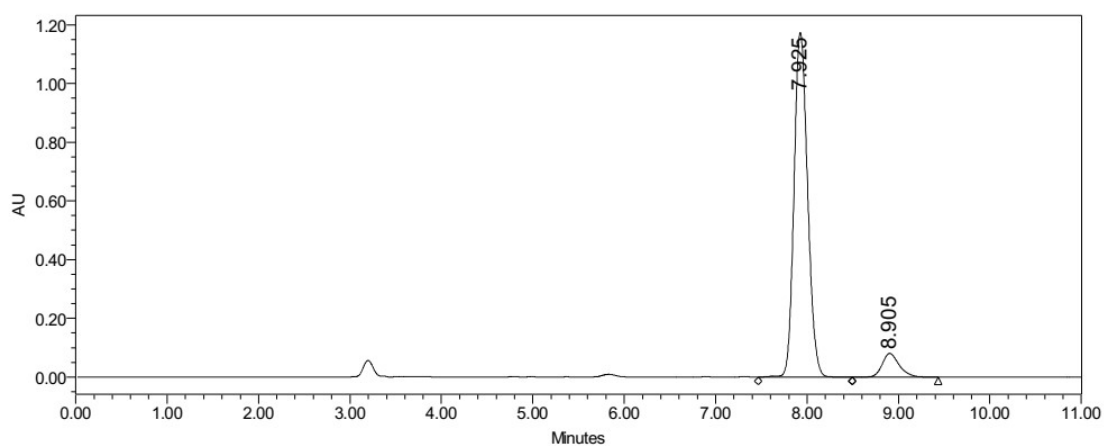

Channel: 2998 Ch1 254nm@4.8nm; Processed Channel: 2998 Ch1 254nm@4.8nm; Result Id: 1995;  
Processing Method: 6 73 2

**Processed Channel Descr.: 2998 Ch1 254nm@4.8nm**

|   | Processed Channel Descr. | RT    | Area     | % Area | Height  |
|---|--------------------------|-------|----------|--------|---------|
| 1 | 2998 Ch1 254nm@4.8nm     | 7.925 | 12082457 | 91.98  | 1173408 |
| 2 | 2998 Ch1 254nm@4.8nm     | 8.905 | 1053219  | 8.02   | 80757   |

(S)-N-(2-cyclohexyl-1H-inden-1-yl)-4-methylbenzenesulfonamide (**2g**)

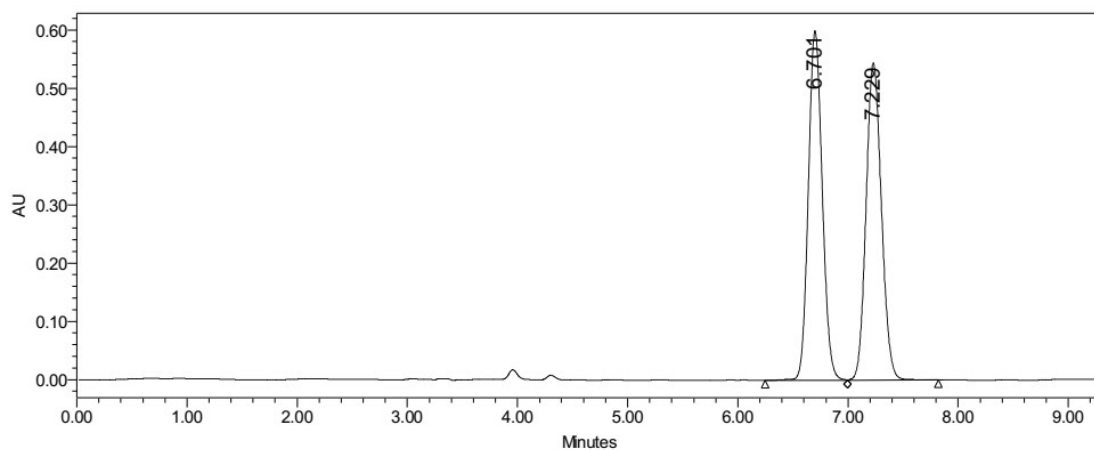

Channel: 2998 Ch1 254nm@4.8nm; Processed Channel: 2998 Ch1 254nm@4.8nm; Result Id: 1649;  
Processing Method: 6 40 1 rac

**Processed Channel Descr.: 2998 Ch1 254nm@4.8nm**

|   | Processed Channel Descr. | RT    | Area    | % Area | Height |
|---|--------------------------|-------|---------|--------|--------|
| 1 | 2998 Ch1 254nm@4.8nm     | 6.701 | 5289009 | 50.07  | 599493 |
| 2 | 2998 Ch1 254nm@4.8nm     | 7.229 | 5274604 | 49.93  | 544316 |

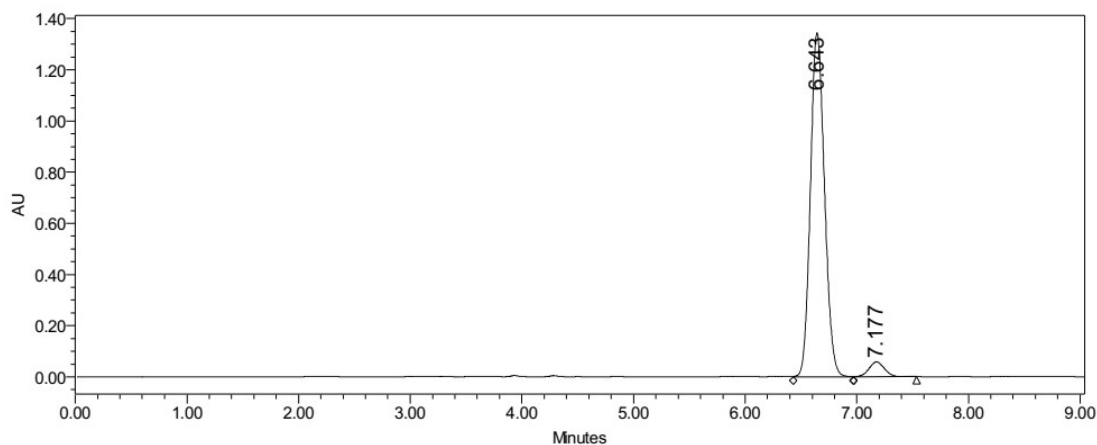

Channel: 2998 Ch1 254nm@4.8nm; Processed Channel: 2998 Ch1 254nm@4.8nm; Result Id: 1923;  
Processing Method: 6 40 2

**Processed Channel Descr.: 2998 Ch1 254nm@4.8nm**

|   | Processed Channel Descr. | RT    | Area     | % Area | Height  |
|---|--------------------------|-------|----------|--------|---------|
| 1 | 2998 Ch1 254nm@4.8nm     | 6.643 | 11768714 | 95.45  | 1344490 |
| 2 | 2998 Ch1 254nm@4.8nm     | 7.177 | 560426   | 4.55   | 57863   |

(S)-N-(2-(tert-butyl)-1H-inden-1-yl)-4-methylbenzenesulfonamide (**2h**)

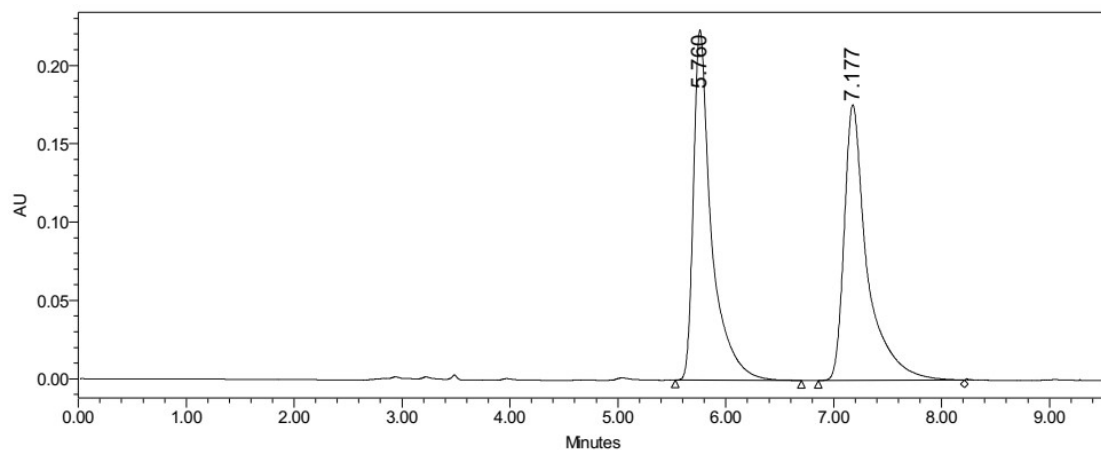

Channel: 2998 Ch1 254nm@4.8nm; Processed Channel: 2998 Ch1 254nm@4.8nm; Result Id: 2301;  
Processing Method: 6 80 1

**Processed Channel Descr.: 2998 Ch1 254nm@4.8nm**

|   | Processed Channel Descr. | RT    | Area    | % Area | Height |
|---|--------------------------|-------|---------|--------|--------|
| 1 | 2998 Ch1 254nm@4.8nm     | 5.760 | 2592459 | 49.86  | 223434 |
| 2 | 2998 Ch1 254nm@4.8nm     | 7.177 | 2607444 | 50.14  | 175848 |

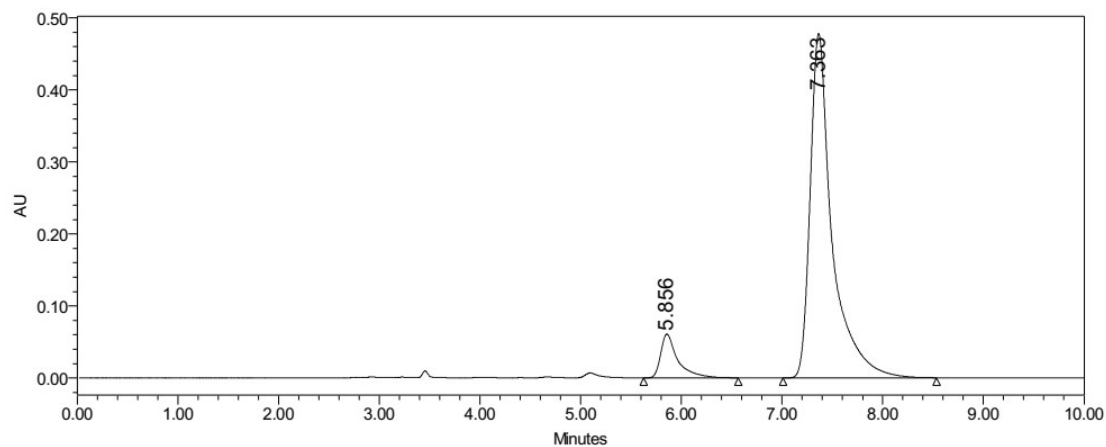

Channel: 2998 Ch1 254nm@4.8nm; Processed Channel: 2998 Ch1 254nm@4.8nm; Result Id: 2315;  
Processing Method: 7 17 1n

**Processed Channel Descr.: 2998 Ch1 254nm@4.8nm**

|   | Processed Channel Descr. | RT    | Area    | % Area | Height |
|---|--------------------------|-------|---------|--------|--------|
| 1 | 2998 Ch1 254nm@4.8nm     | 5.856 | 713978  | 9.00   | 60742  |
| 2 | 2998 Ch1 254nm@4.8nm     | 7.363 | 7217258 | 91.00  | 478071 |

(S)-4-methyl-N-(3-methyl-1H-inden-1-yl)benzenesulfonamid (**2i**)

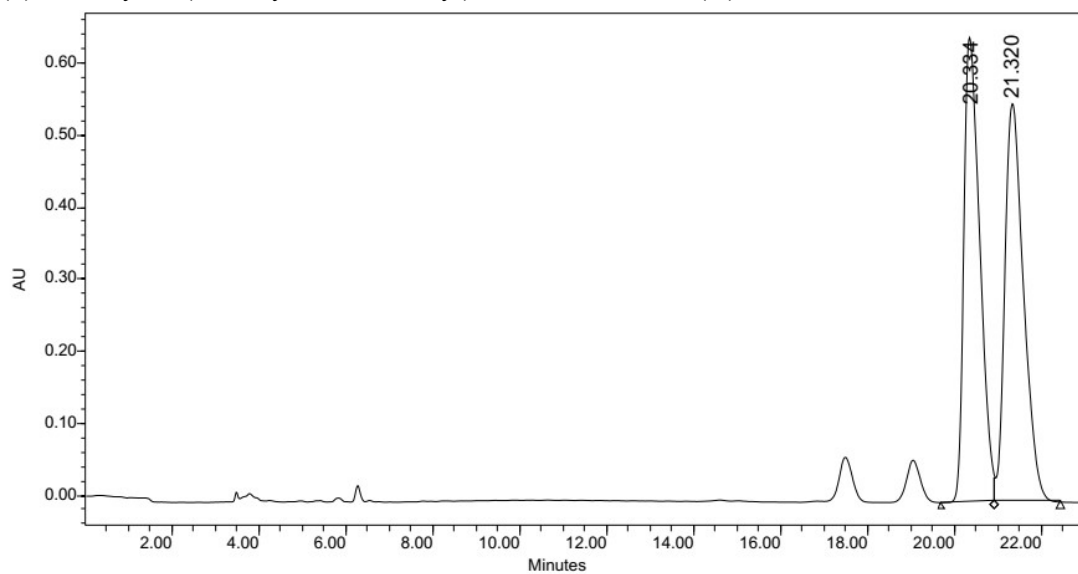

|   | RT<br>(min) | Area<br>( V*sec) | % Area | Height<br>( V) | %<br>Height |
|---|-------------|------------------|--------|----------------|-------------|
| 1 | 20.334      | 16552816         | 49.94  | 645366         | 53.83       |
| 2 | 21.320      | 16589604         | 50.06  | 553543         | 46.17       |

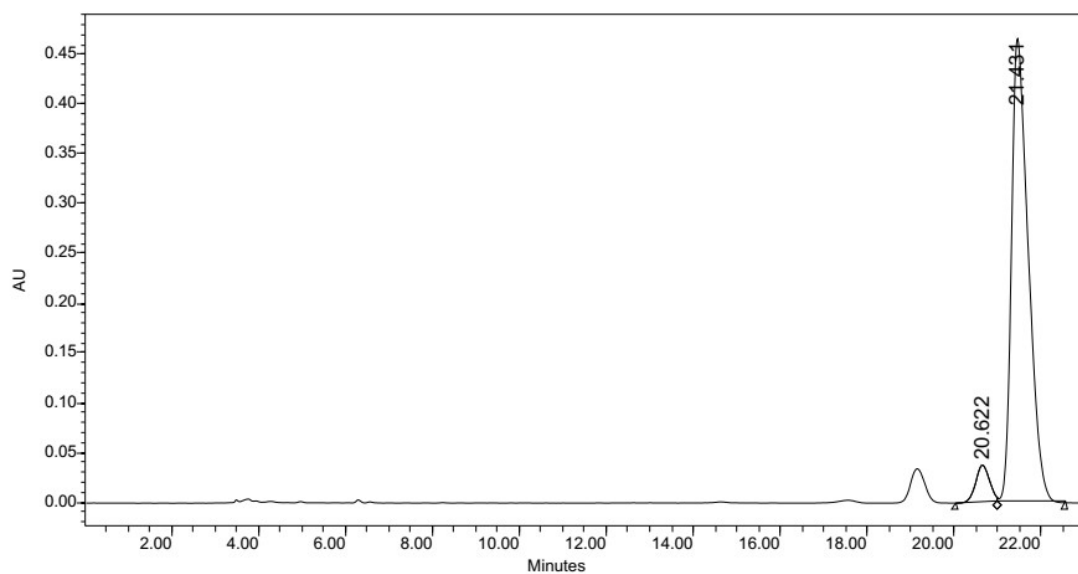

|   | RT<br>(min) | Area<br>( V*sec) | % Area | Height<br>( V) | %<br>Height |
|---|-------------|------------------|--------|----------------|-------------|
| 1 | 20.622      | 872625           | 6.48   | 38183          | 7.56        |
| 2 | 21.431      | 12601963         | 93.52  | 466744         | 92.44       |

(S)-N-(3-(tert-butyl)-1H-inden-1-yl)-4-methylbenzenesulfonamide (**2j**)

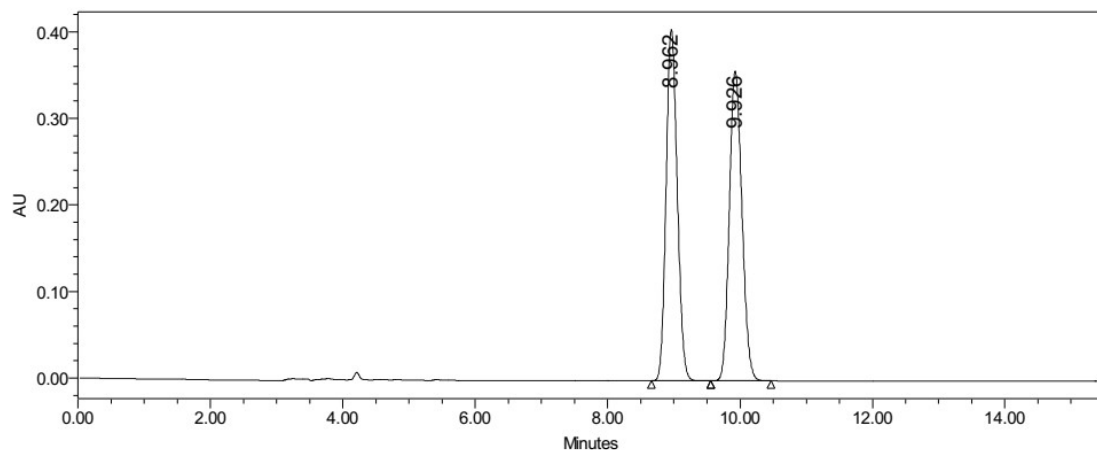

Channel: 2998 Ch1 254nm@4.8nm; Processed Channel: 2998 Ch1 254nm@4.8nm; Result Id: 1799;  
Processing Method: 6 50 1

**Processed Channel Descr.: 2998 Ch1 254nm@4.8nm**

|   | Processed Channel Descr. | RT    | Area    | % Area | Height |
|---|--------------------------|-------|---------|--------|--------|
| 1 | 2998 Ch1 254nm@4.8nm     | 8.962 | 4724464 | 50.00  | 405806 |
| 2 | 2998 Ch1 254nm@4.8nm     | 9.926 | 4723882 | 50.00  | 357877 |

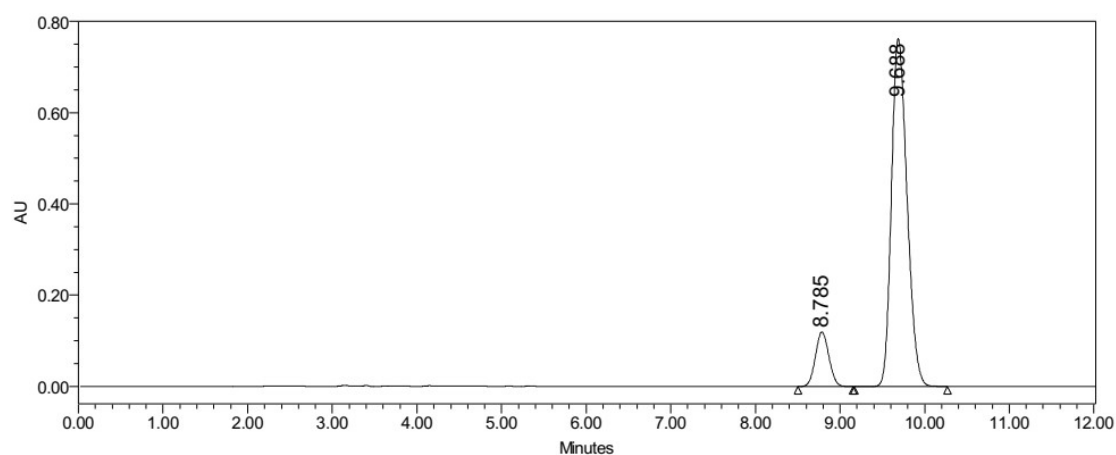

Channel: 2998 Ch1 254nm@4.8nm; Processed Channel: 2998 Ch1 254nm@4.8nm; Result Id: 1797;  
Processing Method: 6 50 2

**Processed Channel Descr.: 2998 Ch1 254nm@4.8nm**

|   | Processed Channel Descr. | RT    | Area    | % Area | Height |
|---|--------------------------|-------|---------|--------|--------|
| 1 | 2998 Ch1 254nm@4.8nm     | 8.785 | 1321030 | 11.93  | 119727 |
| 2 | 2998 Ch1 254nm@4.8nm     | 9.688 | 9752973 | 88.07  | 761872 |

(S)-4-methyl-N-(3-phenyl-1H-inden-1-yl)benzenesulfonamide (**2k**)

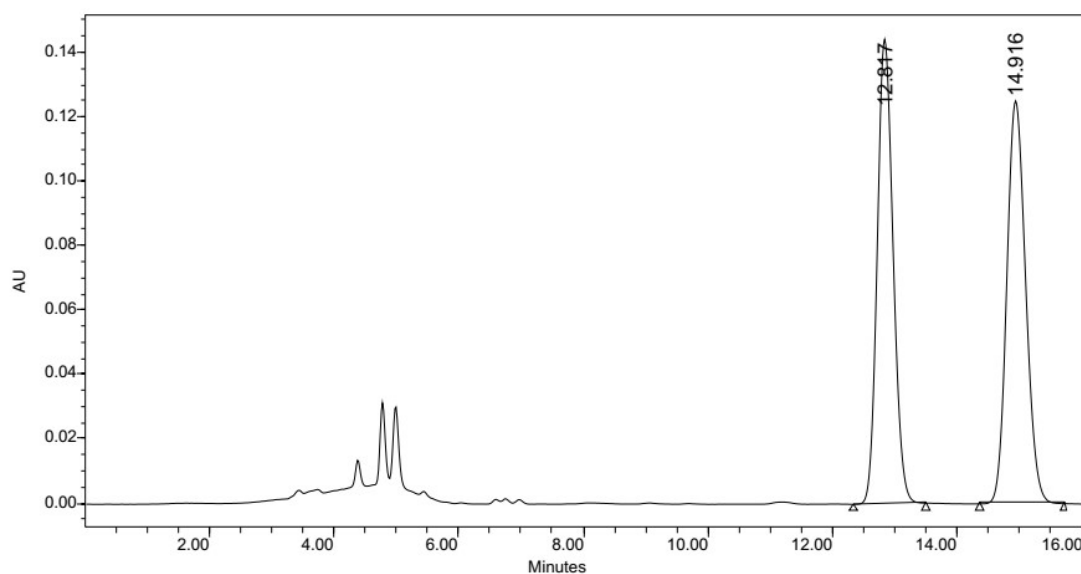

|   | RT<br>(min) | Area<br>( V*sec) | % Area | Height<br>( V) | % Height |
|---|-------------|------------------|--------|----------------|----------|
| 1 | 12.817      | 2556767          | 49.36  | 144139         | 53.55    |
| 2 | 14.916      | 2622966          | 50.64  | 125042         | 46.45    |

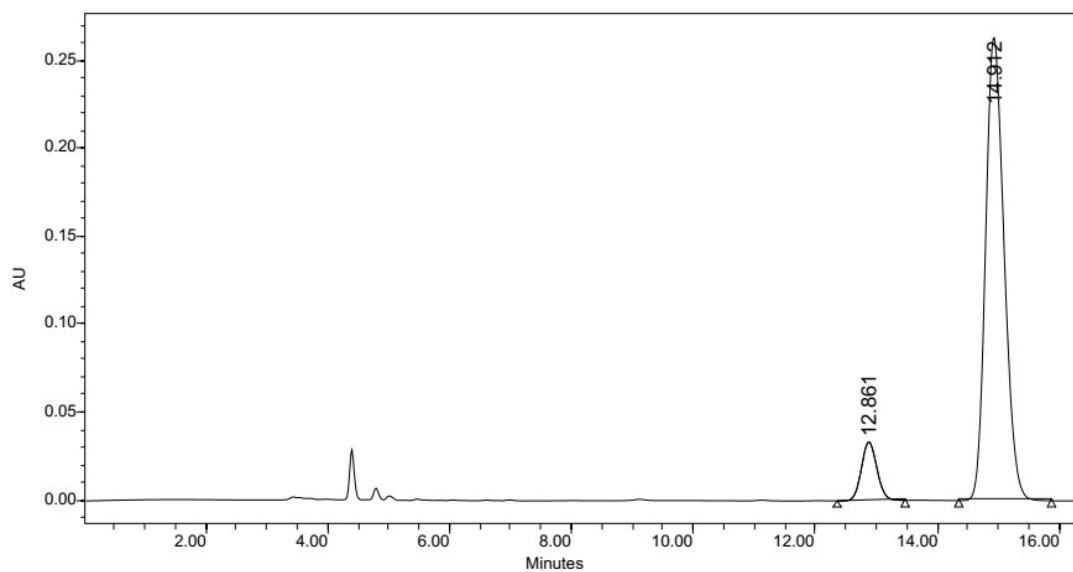

|   | RT<br>(min) | Area<br>( V*sec) | % Area | Height<br>( V) | % Height |
|---|-------------|------------------|--------|----------------|----------|
| 1 | 12.861      | 590114           | 9.58   | 33298          | 11.22    |
| 2 | 14.912      | 5571225          | 90.42  | 263459         | 88.78    |

(S)-N-(3-(3,4-dichlorophenyl)-1H-inden-1-yl)-4-methylbenzenesulfonamide (**21**)

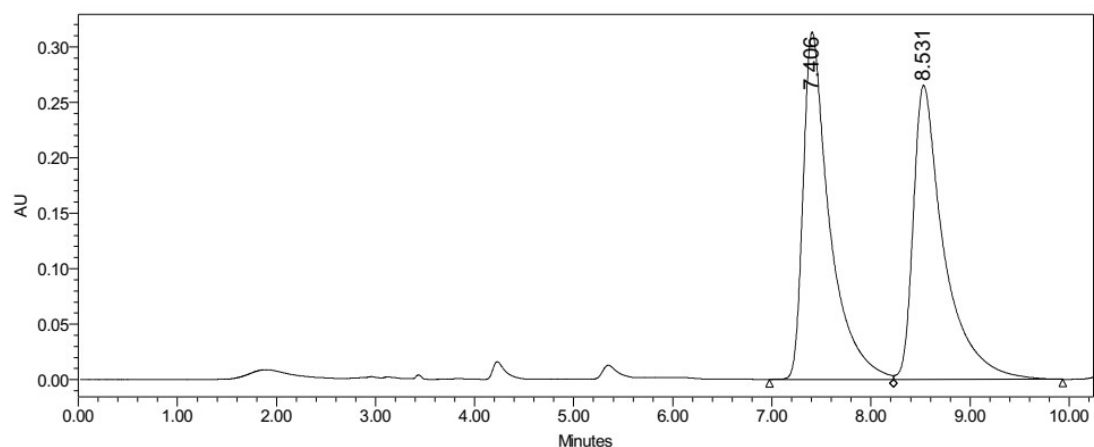

Channel: 2998 Ch1 254nm@4.8nm; Processed Channel: 2998 Ch1 254nm@4.8nm; Result Id: 1839;  
Processing Method: 6 56 1

**Processed Channel Descr.: 2998 Ch1 254nm@4.8nm**

|   | Processed Channel Descr. | RT    | Area    | % Area | Height |
|---|--------------------------|-------|---------|--------|--------|
| 1 | 2998 Ch1 254nm@4.8nm     | 7.406 | 5800538 | 50.42  | 313198 |
| 2 | 2998 Ch1 254nm@4.8nm     | 8.531 | 5703666 | 49.58  | 265125 |

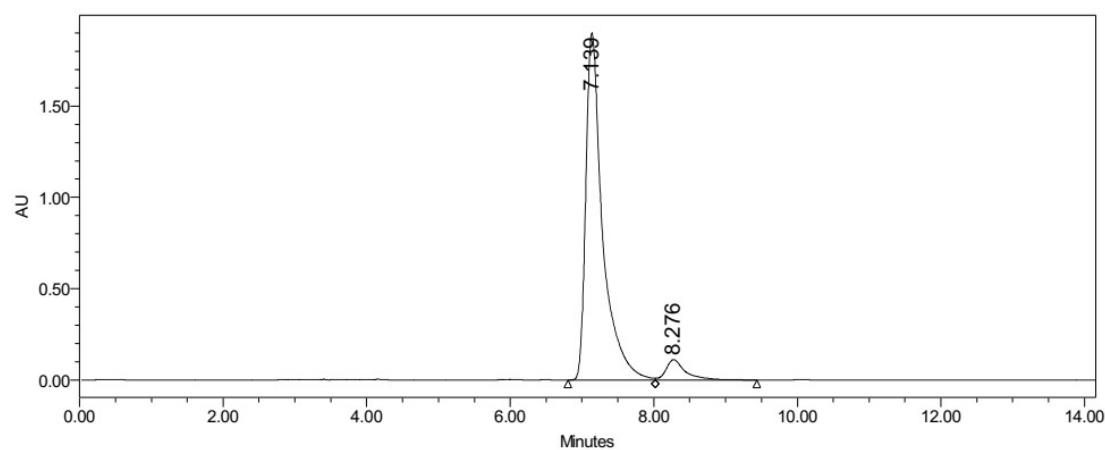

Channel: 2998 Ch1 254nm@4.8nm; Processed Channel: 2998 Ch1 254nm@4.8nm; Result Id: 2073;  
Processing Method: 6 56 4

**Processed Channel Descr.: 2998 Ch1 254nm@4.8nm**

|   | Processed Channel Descr. | RT    | Area     | % Area | Height  |
|---|--------------------------|-------|----------|--------|---------|
| 1 | 2998 Ch1 254nm@4.8nm     | 7.139 | 30859901 | 93.57  | 1902491 |
| 2 | 2998 Ch1 254nm@4.8nm     | 8.276 | 2119554  | 6.43   | 112363  |



(S)-4-methyl-N-(3-(naphthalen-1-yl)-1H-inden-1-yl)benzenesulfonamide (**2m**)

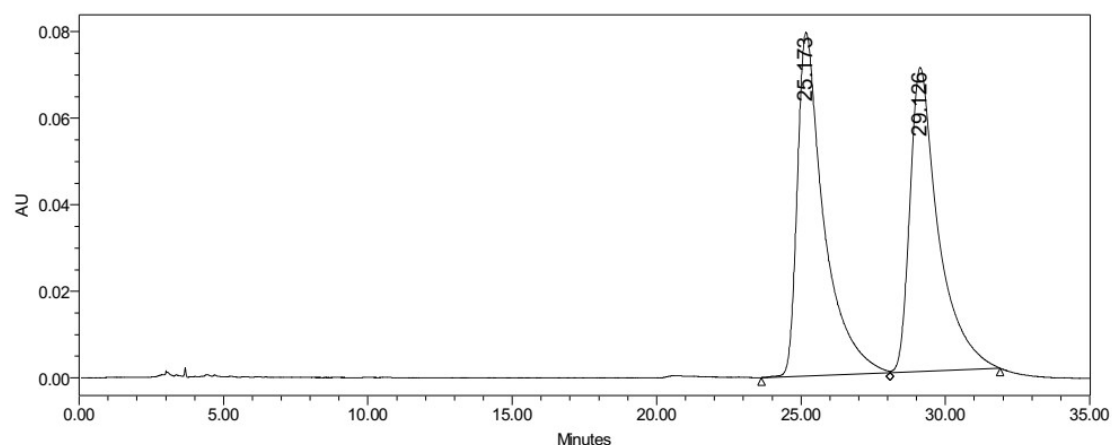

Channel: 2998 Ch1 254nm@4.8nm; Processed Channel: 2998 Ch1 254nm@4.8nm; Result Id: 2278;  
Processing Method: 7 13 1

**Processed Channel Descr.: 2998 Ch1 254nm@4.8nm**

|   | Processed Channel Descr. | RT     | Area    | % Area | Height |
|---|--------------------------|--------|---------|--------|--------|
| 1 | 2998 Ch1 254nm@4.8nm     | 25.173 | 5077955 | 51.25  | 79412  |
| 2 | 2998 Ch1 254nm@4.8nm     | 29.126 | 4829934 | 48.75  | 70236  |

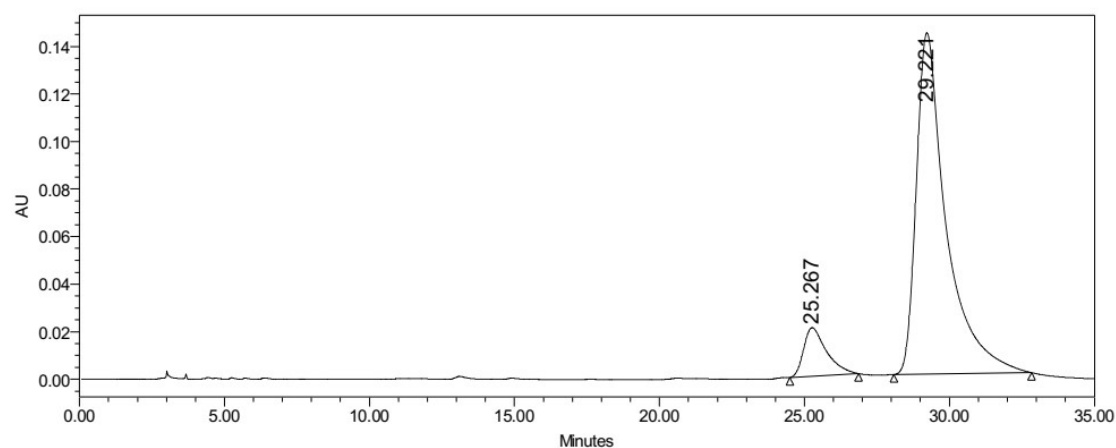

Channel: 2998 Ch1 254nm@4.8nm; Processed Channel: 2998 Ch1 254nm@4.8nm; Result Id: 2290;  
Processing Method: 7 13 2

**Processed Channel Descr.: 2998 Ch1 254nm@4.8nm**

|   | Processed Channel Descr. | RT     | Area     | % Area | Height |
|---|--------------------------|--------|----------|--------|--------|
| 1 | 2998 Ch1 254nm@4.8nm     | 25.267 | 1123497  | 9.82   | 20457  |
| 2 | 2998 Ch1 254nm@4.8nm     | 29.221 | 10320377 | 90.18  | 143672 |

(S)-N-(2,3-dimethyl-1H-inden-1-yl)-4-methylbenzenesulfonamide (**2n**)

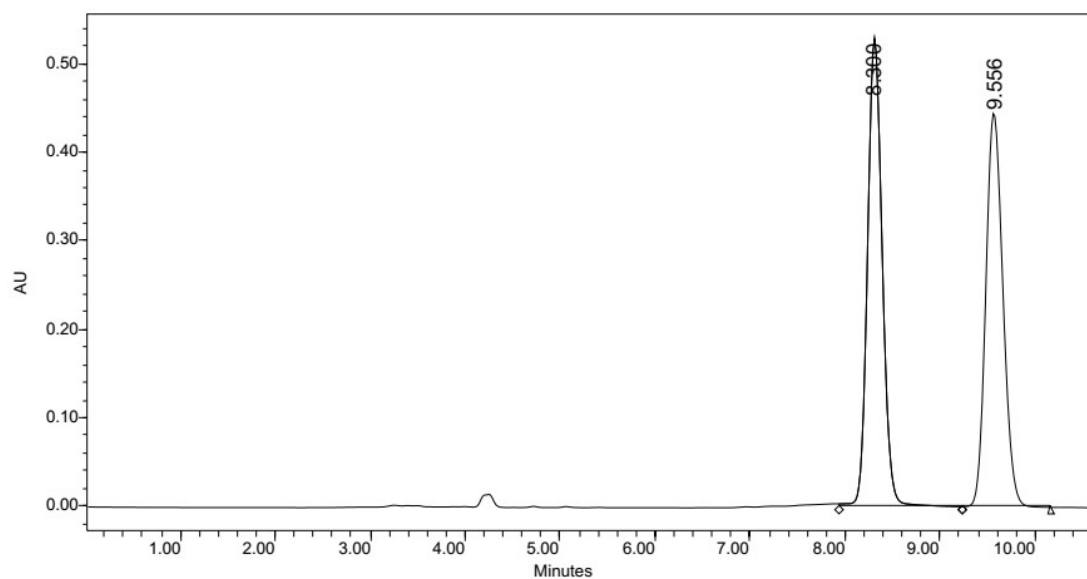

|   | RT<br>(min) | Area<br>( V*sec) | % Area | Height<br>( V) | %<br>Height |
|---|-------------|------------------|--------|----------------|-------------|
| 1 | 8.300       | 5820278          | 50.96  | 529846         | 54.27       |
| 2 | 9.556       | 5601678          | 49.04  | 446419         | 45.73       |

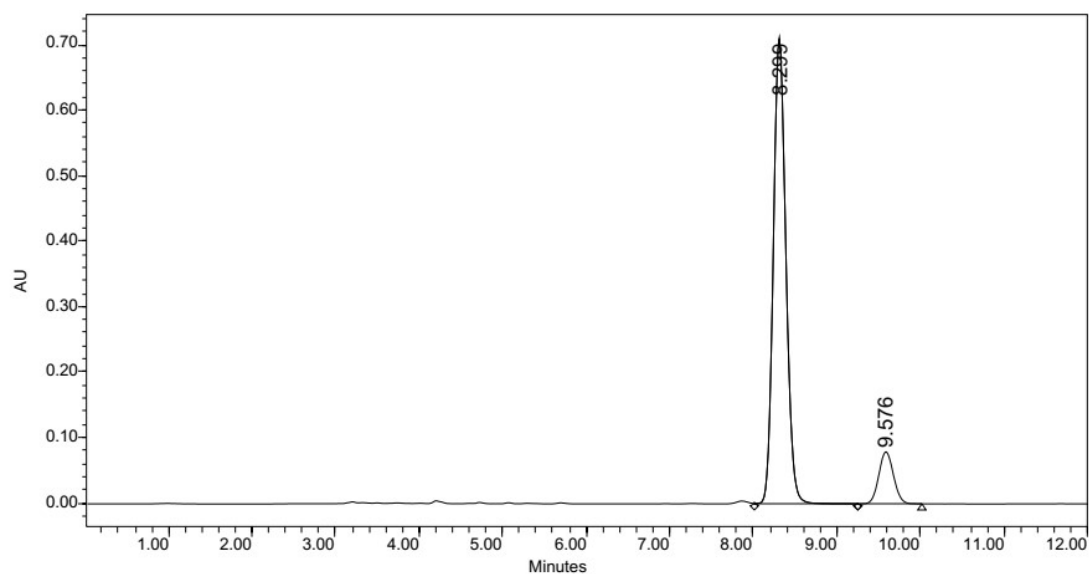

|   | RT<br>(min) | Area<br>( V*sec) | % Area | Height<br>( V) | %<br>Height |
|---|-------------|------------------|--------|----------------|-------------|
| 1 | 8.299       | 7436395          | 88.45  | 709796         | 89.92       |
| 2 | 9.576       | 970739           | 11.55  | 79557          | 10.08       |

(S)-4-methyl-N-(1,2,3,8-tetrahydrocyclopenta[a]inden-8-yl)benzenesulfonamide (**2o**)

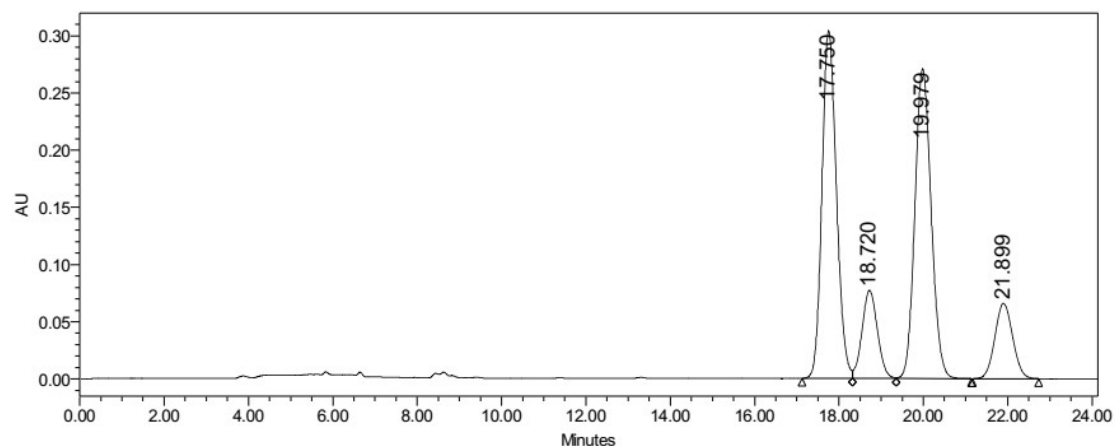

Channel: 2998 Ch1 254nm@4.8nm; Processed Channel: 2998 Ch1 254nm@4.8nm; Result Id: 1458;  
Processing Method: 6 14 1 rac

**Processed Channel Descr.: 2998 Ch1 254nm@4.8nm**

|   | Processed Channel Descr. | RT     | Area    | % Area | Height |
|---|--------------------------|--------|---------|--------|--------|
| 1 | 2998 Ch1 254nm@4.8nm     | 17.750 | 7220419 | 39.30  | 303967 |
| 2 | 2998 Ch1 254nm@4.8nm     | 18.720 | 1946099 | 10.59  | 77068  |
| 3 | 2998 Ch1 254nm@4.8nm     | 19.979 | 7268686 | 39.56  | 270952 |
| 4 | 2998 Ch1 254nm@4.8nm     | 21.899 | 1936897 | 10.54  | 66001  |

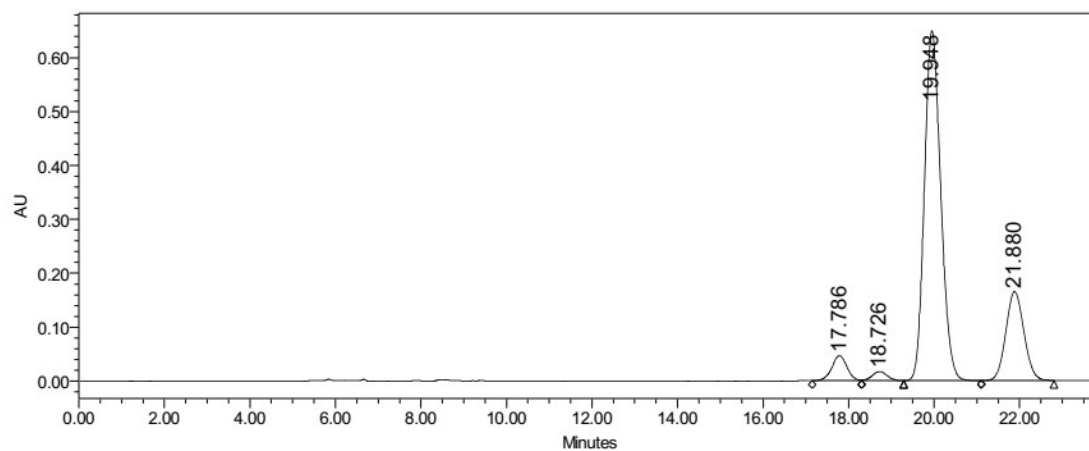

Channel: 2998 Ch1 254nm@4.8nm; Processed Channel: 2998 Ch1 254nm@4.8nm; Result Id: 1460;  
Processing Method: 6 14 2

**Processed Channel Descr.: 2998 Ch1 254nm@4.8nm**

|   | Processed Channel Descr. | RT     | Area     | % Area | Height |
|---|--------------------------|--------|----------|--------|--------|
| 1 | 2998 Ch1 254nm@4.8nm     | 17.786 | 1153881  | 4.89   | 46664  |
| 2 | 2998 Ch1 254nm@4.8nm     | 18.726 | 413407   | 1.75   | 16888  |
| 3 | 2998 Ch1 254nm@4.8nm     | 19.948 | 17214170 | 72.89  | 648877 |
| 4 | 2998 Ch1 254nm@4.8nm     | 21.880 | 4836413  | 20.48  | 164989 |

(S)-4-methyl-N-(2,3,4,9-tetrahydro-1H-fluoren-9-yl)benzenesulfonamide (**2p**)

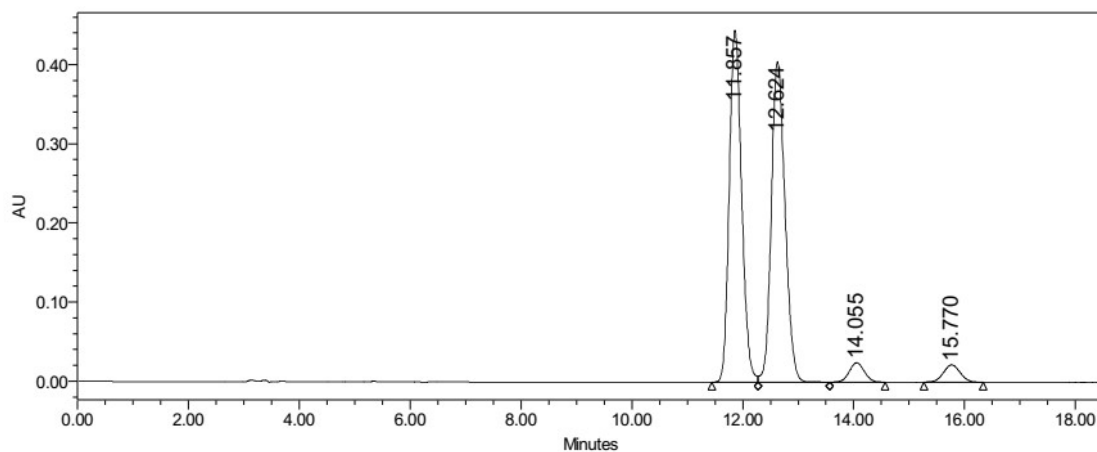

Channel: 2998 Ch1 254nm@4.8nm; Processed Channel: 2998 Ch1 254nm@4.8nm; Result Id: 1433;  
Processing Method: 5 98 rac

**Processed Channel Descr.: 2998 Ch1 254nm@4.8nm**

|   | Processed Channel Descr. | RT     | Area    | % Area | Height |
|---|--------------------------|--------|---------|--------|--------|
| 1 | 2998 Ch1 254nm@4.8nm     | 11.857 | 6903638 | 46.76  | 444646 |
| 2 | 2998 Ch1 254nm@4.8nm     | 12.624 | 6935018 | 46.97  | 405228 |
| 3 | 2998 Ch1 254nm@4.8nm     | 14.055 | 465332  | 3.15   | 24532  |
| 4 | 2998 Ch1 254nm@4.8nm     | 15.770 | 460372  | 3.12   | 21846  |

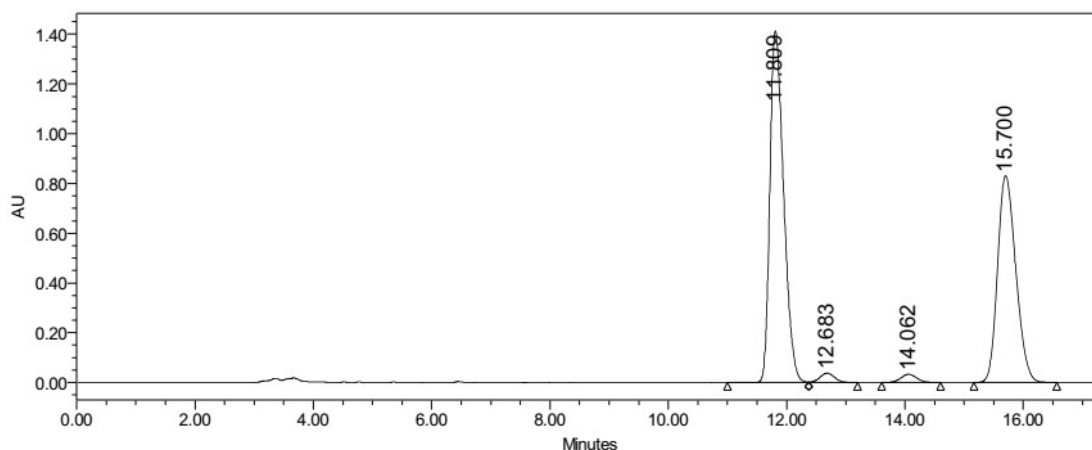

Channel: 2998 Ch1 254nm@4.8nm; Processed Channel: 2998 Ch1 254nm@4.8nm; Result Id: 1435;  
Processing Method: 5 98 2

**Processed Channel Descr.: 2998 Ch1 254nm@4.8nm**

|   | Processed Channel Descr. | RT     | Area     | % Area | Height  |
|---|--------------------------|--------|----------|--------|---------|
| 1 | 2998 Ch1 254nm@4.8nm     | 11.809 | 22729630 | 54.33  | 1412283 |
| 2 | 2998 Ch1 254nm@4.8nm     | 12.683 | 649970   | 1.55   | 37692   |
| 3 | 2998 Ch1 254nm@4.8nm     | 14.062 | 617111   | 1.48   | 32853   |
| 4 | 2998 Ch1 254nm@4.8nm     | 15.700 | 17838341 | 42.64  | 830880  |

(S)-N-(2,7-dimethyl-1H-inden-1-yl)-4-methylbenzenesulfonamide (**2q**)

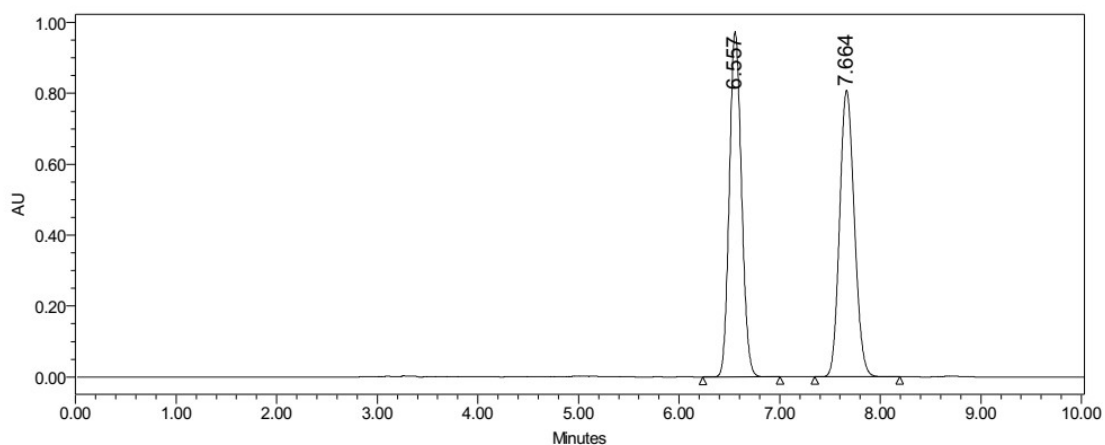

Channel: 2998 Ch1 254nm@4.8nm; Processed Channel: 2998 Ch1 254nm@4.8nm; Result Id: 1813;  
Processing Method: 6 57 1

**Processed Channel Descr.: 2998 Ch1 254nm@4.8nm**

|   | Processed Channel Descr. | RT    | Area    | % Area | Height |
|---|--------------------------|-------|---------|--------|--------|
| 1 | 2998 Ch1 254nm@4.8nm     | 6.557 | 8150513 | 49.89  | 973884 |
| 2 | 2998 Ch1 254nm@4.8nm     | 7.664 | 8186296 | 50.11  | 808384 |

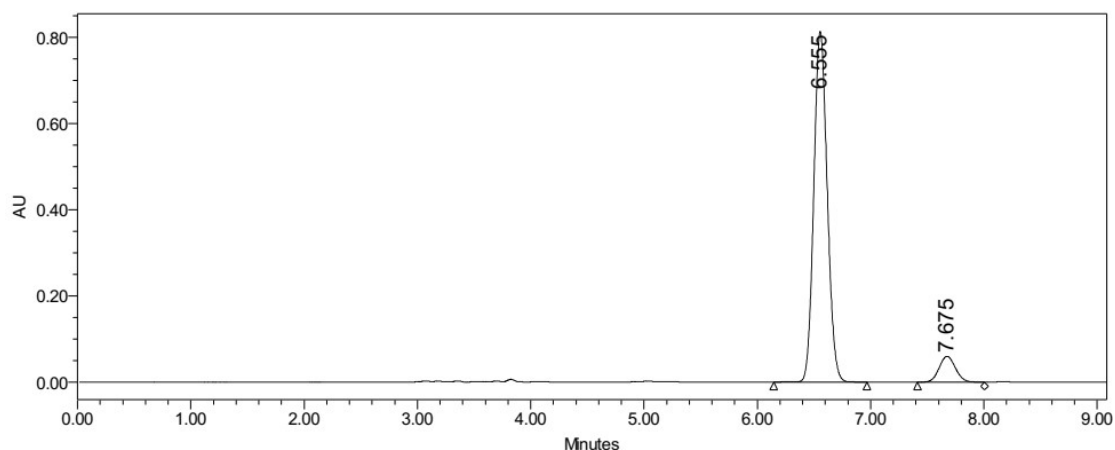

Channel: 2998 Ch1 254nm@4.8nm; Processed Channel: 2998 Ch1 254nm@4.8nm; Result Id: 1833;  
Processing Method: 6 57 2

**Processed Channel Descr.: 2998 Ch1 254nm@4.8nm**

|   | Processed Channel Descr. | RT    | Area    | % Area | Height |
|---|--------------------------|-------|---------|--------|--------|
| 1 | 2998 Ch1 254nm@4.8nm     | 6.555 | 6699795 | 91.81  | 813499 |
| 2 | 2998 Ch1 254nm@4.8nm     | 7.675 | 597559  | 8.19   | 60015  |

(S)-N-(2,5-dimethyl-1H-inden-1-yl)-4-methylbenzenesulfonamide (**2r**)

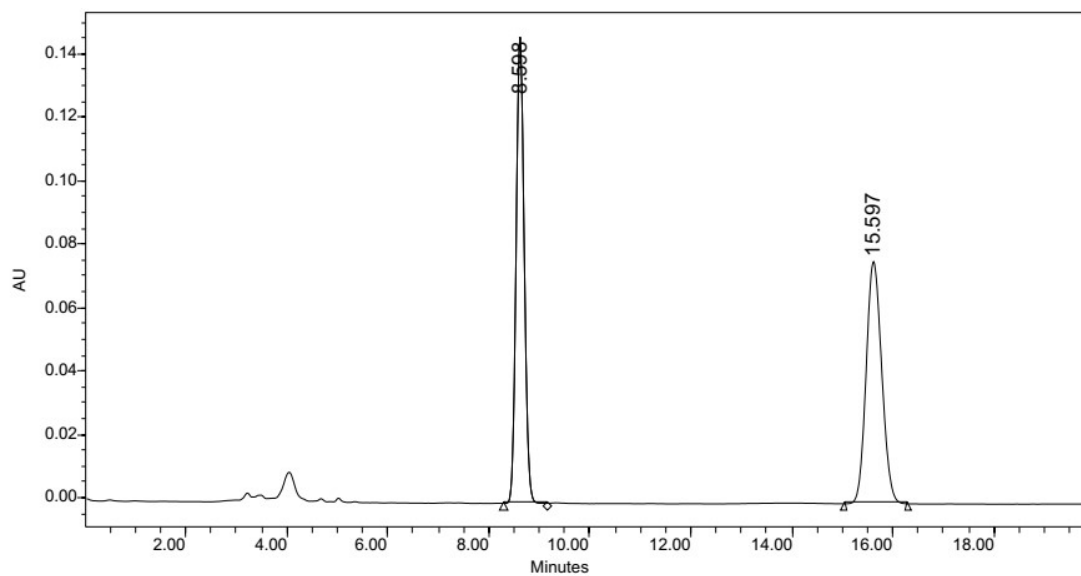

|   | RT<br>(min) | Area<br>(V*sec) | % Area | Height<br>(V) | % Height |
|---|-------------|-----------------|--------|---------------|----------|
| 1 | 8.598       | 1636816         | 49.96  | 146963        | 65.80    |
| 2 | 15.597      | 1639557         | 50.04  | 76397         | 34.20    |

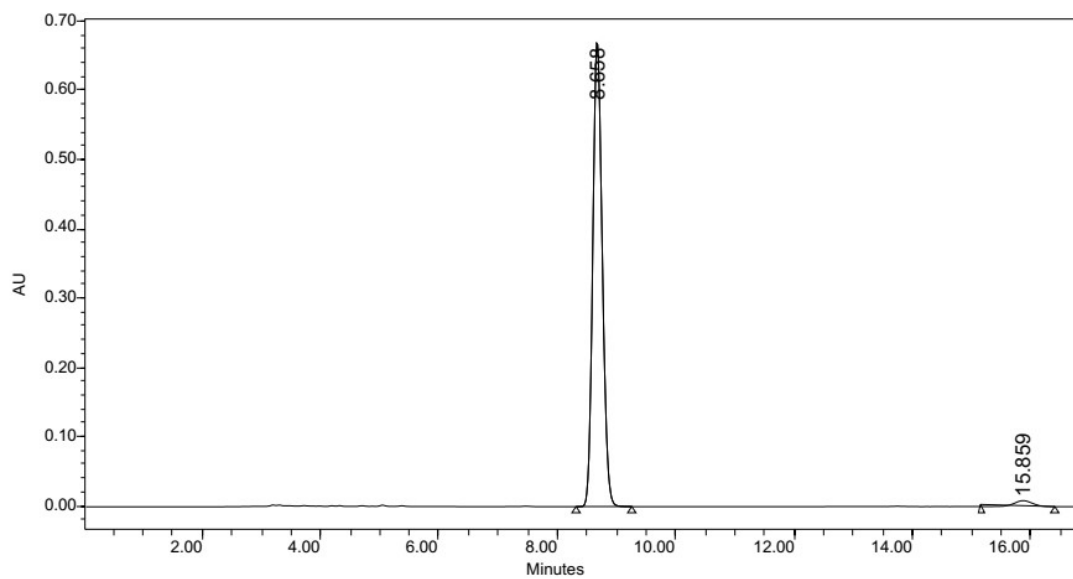

|   | RT<br>(min) | Area<br>(V*sec) | % Area | Height<br>(V) | % Height |
|---|-------------|-----------------|--------|---------------|----------|
| 1 | 8.658       | 7505637         | 97.52  | 672259        | 98.73    |
| 2 | 15.859      | 190666          | 2.48   | 8614          | 1.27     |

(S)-N-(2,4-dimethyl-1H-inden-1-yl)-4-methylbenzenesulfonamide (**2s**)

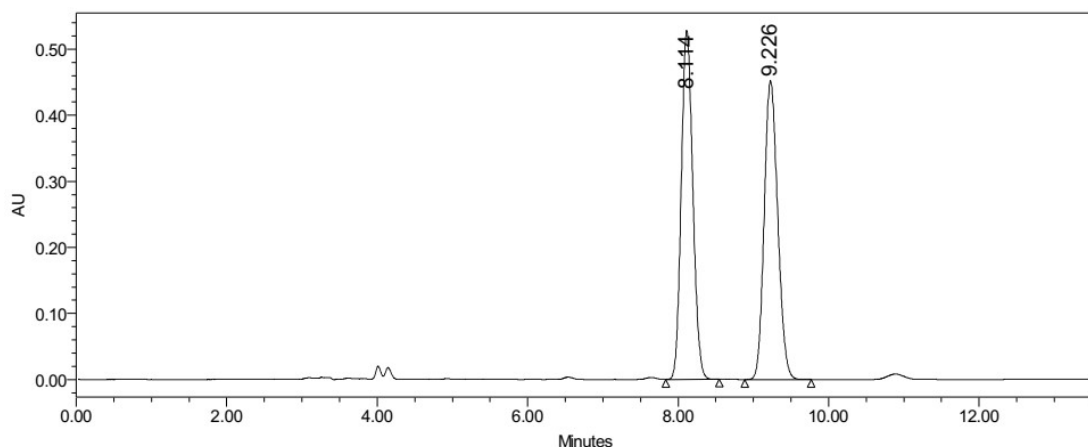

Channel: 2998 Ch1 254nm@4.8nm; Processed Channel: 2998 Ch1 254nm@4.8nm; Result Id: 1873;  
Processing Method: 6 64 1

**Processed Channel Descr.: 2998 Ch1 254nm@4.8nm**

|   | Processed Channel Descr. | RT    | Area    | % Area | Height |
|---|--------------------------|-------|---------|--------|--------|
| 1 | 2998 Ch1 254nm@4.8nm     | 8.114 | 5635081 | 49.94  | 528181 |
| 2 | 2998 Ch1 254nm@4.8nm     | 9.226 | 5647556 | 50.06  | 452455 |

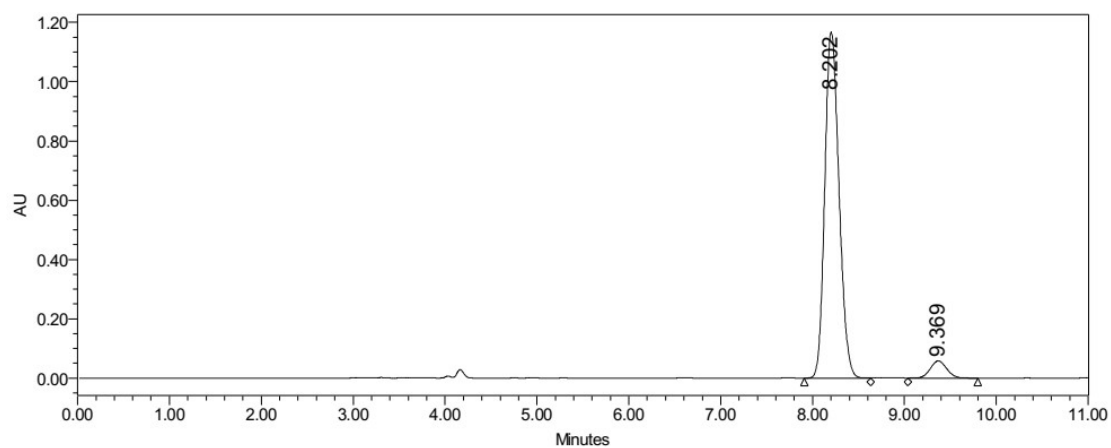

Channel: 2998 Ch1 254nm@4.8nm; Processed Channel: 2998 Ch1 254nm@4.8nm; Result Id: 1921;  
Processing Method: 6 64 2

**Processed Channel Descr.: 2998 Ch1 254nm@4.8nm**

|   | Processed Channel Descr. | RT    | Area     | % Area | Height  |
|---|--------------------------|-------|----------|--------|---------|
| 1 | 2998 Ch1 254nm@4.8nm     | 8.202 | 12570365 | 94.58  | 1167737 |
| 2 | 2998 Ch1 254nm@4.8nm     | 9.369 | 720979   | 5.42   | 57816   |

(S)-N-(5-fluoro-2-methyl-1H-inden-1-yl)-4-methylbenzenesulfonamide (**2t**)

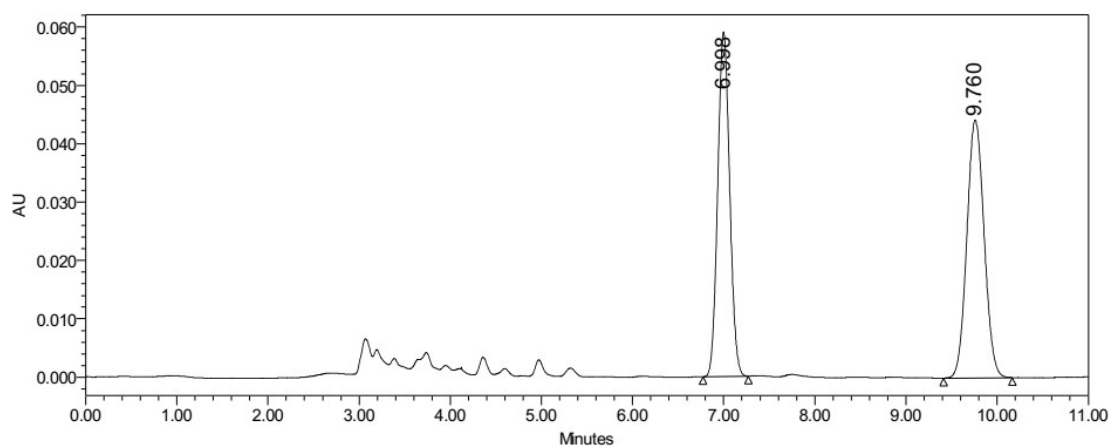

Channel: 2998 Ch1 254nm@4.8nm; Processed Channel: 2998 Ch1 254nm@4.8nm; Result Id: 1173;  
Processing Method: ZY 5 93 3 RAC

**Processed Channel Descr.: 2998 Ch1 254nm@4.8nm**

|   | Processed Channel Descr. | RT    | Area   | % Area | Height |
|---|--------------------------|-------|--------|--------|--------|
| 1 | 2998 Ch1 254nm@4.8nm     | 6.998 | 534988 | 48.06  | 59000  |
| 2 | 2998 Ch1 254nm@4.8nm     | 9.760 | 578072 | 51.94  | 44195  |

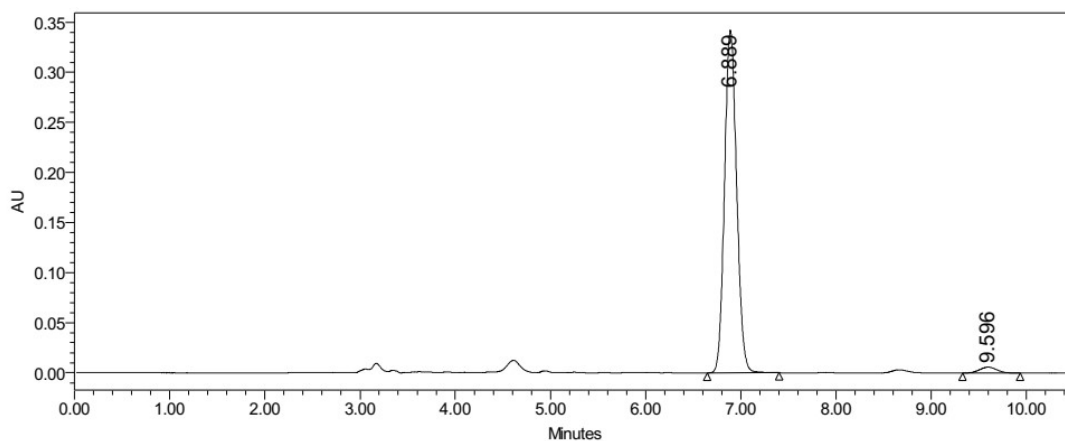

Channel: 2998 Ch1 254nm@4.8nm; Processed Channel: 2998 Ch1 254nm@4.8nm; Result Id: 1171;  
Processing Method: ZY 5 93 3 ASY

**Processed Channel Descr.: 2998 Ch1 254nm@4.8nm**

|   | Processed Channel Descr. | RT    | Area    | % Area | Height |
|---|--------------------------|-------|---------|--------|--------|
| 1 | 2998 Ch1 254nm@4.8nm     | 6.889 | 3022651 | 97.58  | 342158 |
| 2 | 2998 Ch1 254nm@4.8nm     | 9.596 | 74943   | 2.42   | 5910   |



(S)-N-(5-methoxy-2-methyl-1H-inden-1-yl)-4-methylbenzenesulfonamide (**2u**)

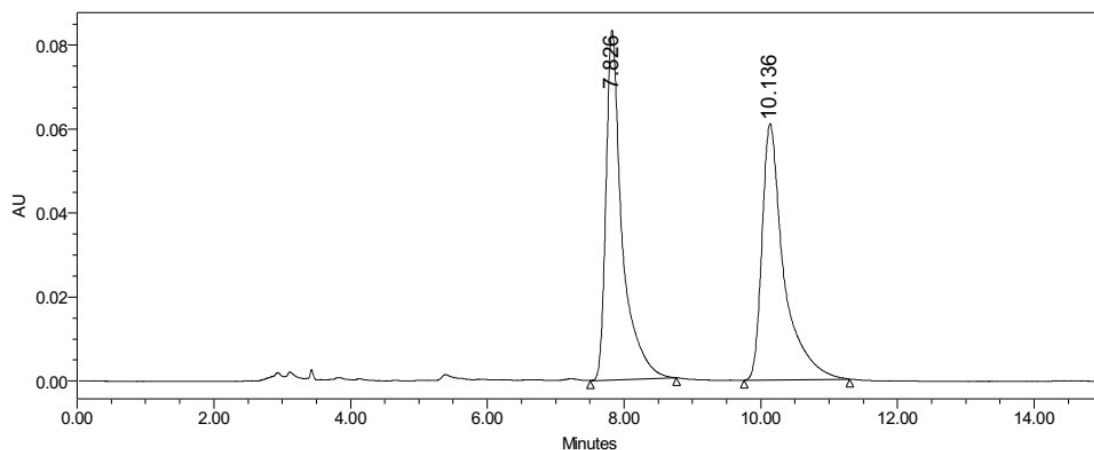

Channel: 2998 Ch1 254nm@4.8nm; Processed Channel: 2998 Ch1 254nm@4.8nm; Result Id: 1319;  
Processing Method: zy 6 5 1 rac

**Processed Channel Descr.: 2998 Ch1 254nm@4.8nm**

|   | Processed Channel Descr. | RT     | Area    | % Area | Height |
|---|--------------------------|--------|---------|--------|--------|
| 1 | 2998 Ch1 254nm@4.8nm     | 7.826  | 1356760 | 50.14  | 83286  |
| 2 | 2998 Ch1 254nm@4.8nm     | 10.136 | 1349058 | 49.86  | 61006  |

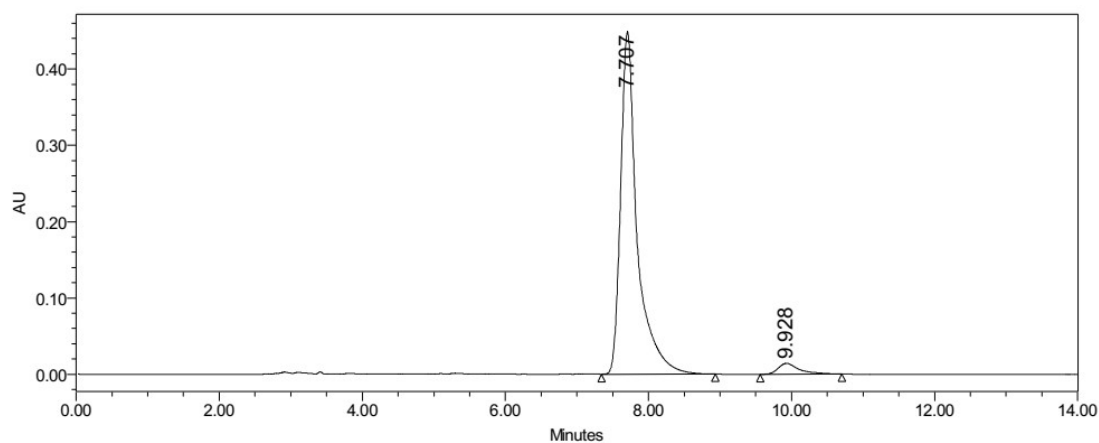

Channel: 2998 Ch1 254nm@4.8nm; Processed Channel: 2998 Ch1 254nm@4.8nm; Result Id: 1571;  
Processing Method: 6 24 3

**Processed Channel Descr.: 2998 Ch1 254nm@4.8nm**

|   | Processed Channel Descr. | RT    | Area    | % Area | Height |
|---|--------------------------|-------|---------|--------|--------|
| 1 | 2998 Ch1 254nm@4.8nm     | 7.707 | 7191441 | 96.08  | 449075 |
| 2 | 2998 Ch1 254nm@4.8nm     | 9.928 | 293164  | 3.92   | 14243  |

(S)-N-(5-chloro-2-methyl-1H-inden-1-yl)-4-methylbenzenesulfonamide (**2v**)

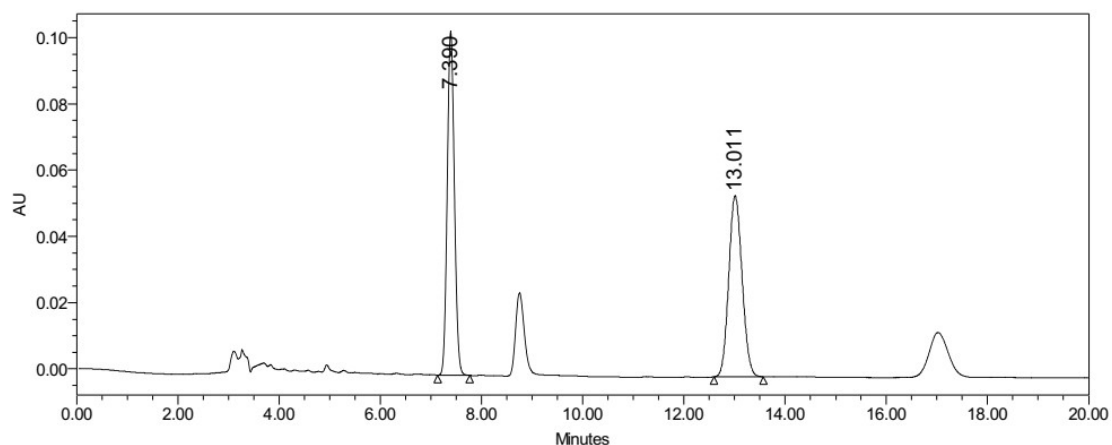

Channel: 2998 Ch1 254nm@4.8nm; Processed Channel: 2998 Ch1 254nm@4.8nm; Result Id: 1953;  
Processing Method: 6 63 1n

**Processed Channel Descr.: 2998 Ch1 254nm@4.8nm**

|   | Processed Channel Descr. | RT     | Area    | % Area | Height |
|---|--------------------------|--------|---------|--------|--------|
| 1 | 2998 Ch1 254nm@4.8nm     | 7.390  | 1015648 | 50.39  | 103821 |
| 2 | 2998 Ch1 254nm@4.8nm     | 13.011 | 1000071 | 49.61  | 54700  |

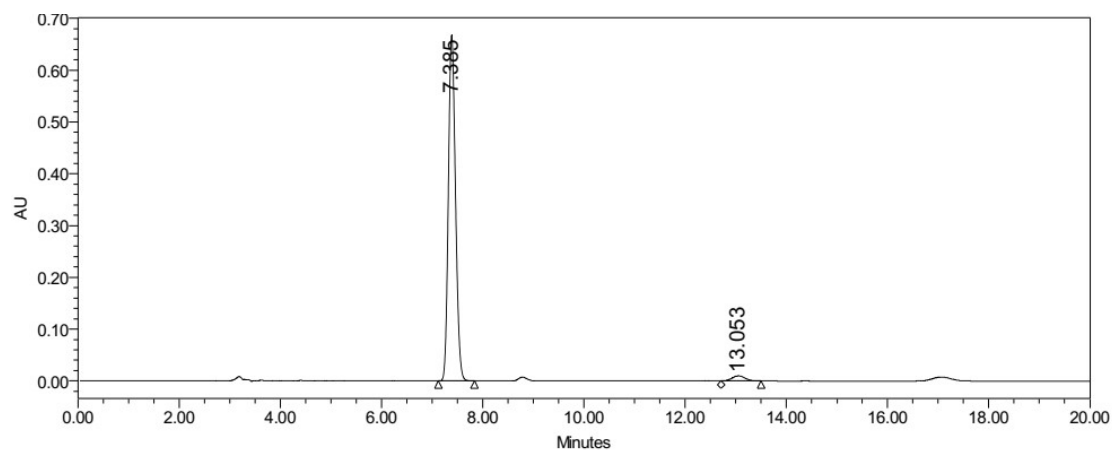

Channel: 2998 Ch1 254nm@4.8nm; Processed Channel: 2998 Ch1 254nm@4.8nm; Result Id: 1925;  
Processing Method: 6 63 2

**Processed Channel Descr.: 2998 Ch1 254nm@4.8nm**

|   | Processed Channel Descr. | RT     | Area    | % Area | Height |
|---|--------------------------|--------|---------|--------|--------|
| 1 | 2998 Ch1 254nm@4.8nm     | 7.385  | 6517240 | 97.30  | 667641 |
| 2 | 2998 Ch1 254nm@4.8nm     | 13.053 | 180582  | 2.70   | 10024  |

(S)-4-methyl-N-(6-methyl-5H-indeno[5,6-d][1,3]dioxol-5-yl)benzenesulfonamide (**2w**)

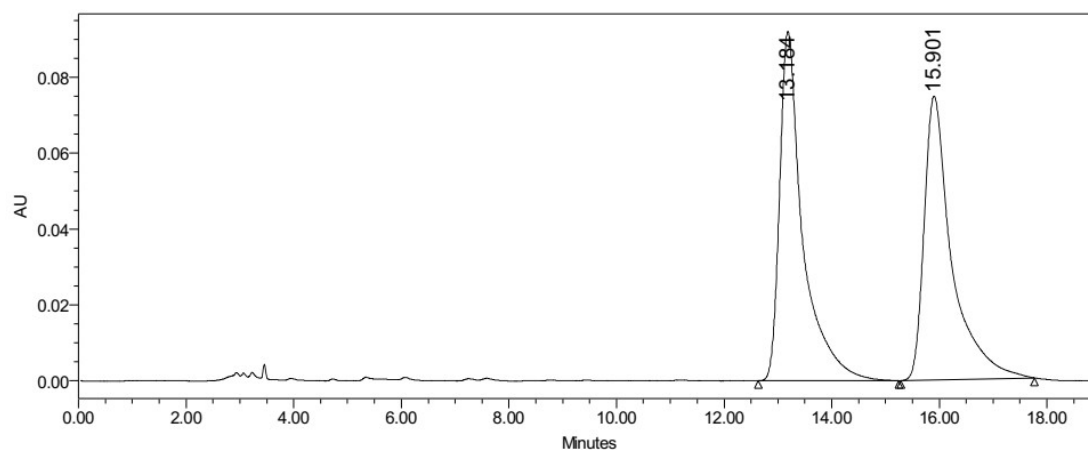

Channel: 2998 Ch1 254nm@4.8nm; Processed Channel: 2998 Ch1 254nm@4.8nm; Result Id: 1321;  
Processing Method: 6 2 1 rac

**Processed Channel Descr.: 2998 Ch1 254nm@4.8nm**

|   | Processed Channel Descr. | RT     | Area    | % Area | Height |
|---|--------------------------|--------|---------|--------|--------|
| 1 | 2998 Ch1 254nm@4.8nm     | 13.184 | 2751405 | 50.77  | 92062  |
| 2 | 2998 Ch1 254nm@4.8nm     | 15.901 | 2667971 | 49.23  | 74809  |

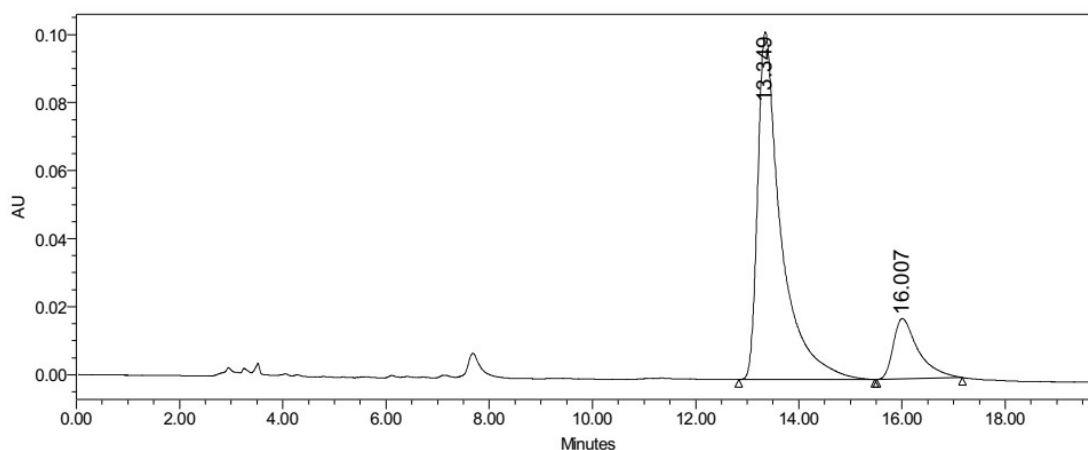

Channel: 2998 Ch1 254nm@4.8nm; Processed Channel: 2998 Ch1 254nm@4.8nm; Result Id: 1485;  
Processing Method: 6 16 3

**Processed Channel Descr.: 2998 Ch1 254nm@4.8nm**

|   | Processed Channel Descr. | RT     | Area    | % Area | Height |
|---|--------------------------|--------|---------|--------|--------|
| 1 | 2998 Ch1 254nm@4.8nm     | 13.349 | 3207784 | 84.25  | 102184 |
| 2 | 2998 Ch1 254nm@4.8nm     | 16.007 | 599753  | 15.75  | 17785  |

4-methyl-N-(((6aR,7S,11bS)-6,6a,7,11b-tetrahydroindeno[2,1-c]chromen-7-yl)benzenesulfonamide (**4a**)

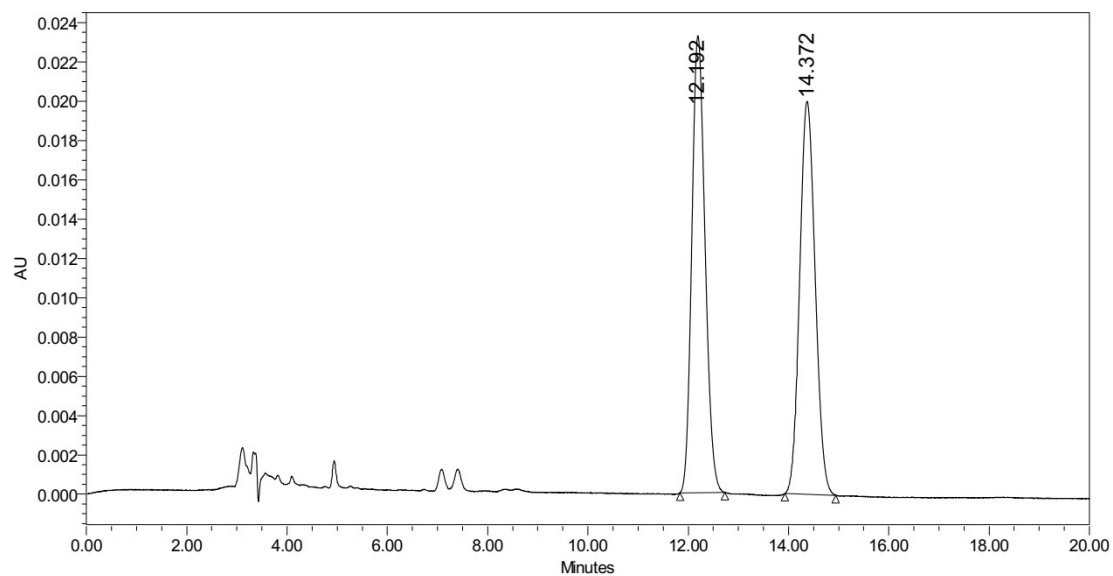

|   | RT     | Area   | % Area | Height |
|---|--------|--------|--------|--------|
| 1 | 12.192 | 425702 | 49.85  | 23253  |
| 2 | 14.372 | 428238 | 50.15  | 20001  |

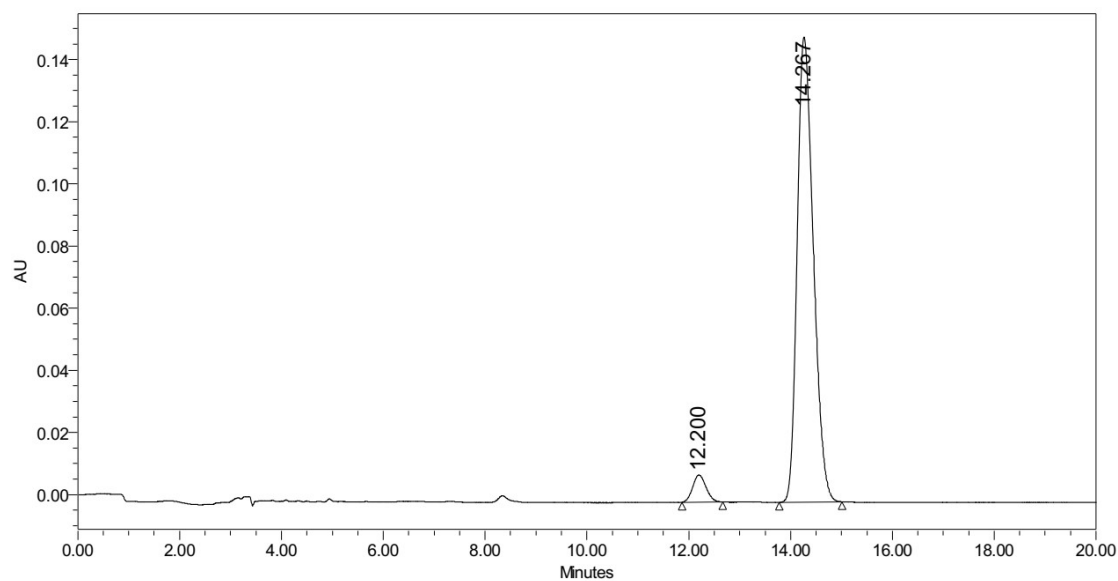

|   | RT     | Area    | % Area | Height |
|---|--------|---------|--------|--------|
| 1 | 12.200 | 158237  | 4.57   | 8717   |
| 2 | 14.267 | 3303475 | 95.43  | 149605 |

4-methyl-N-(((6aR,7S,11bS)-2-methyl-6,6a,7,11b-tetrahydroindeno[2,1-c]chromen-7-yl)benzenesulfonamide (**4b**)

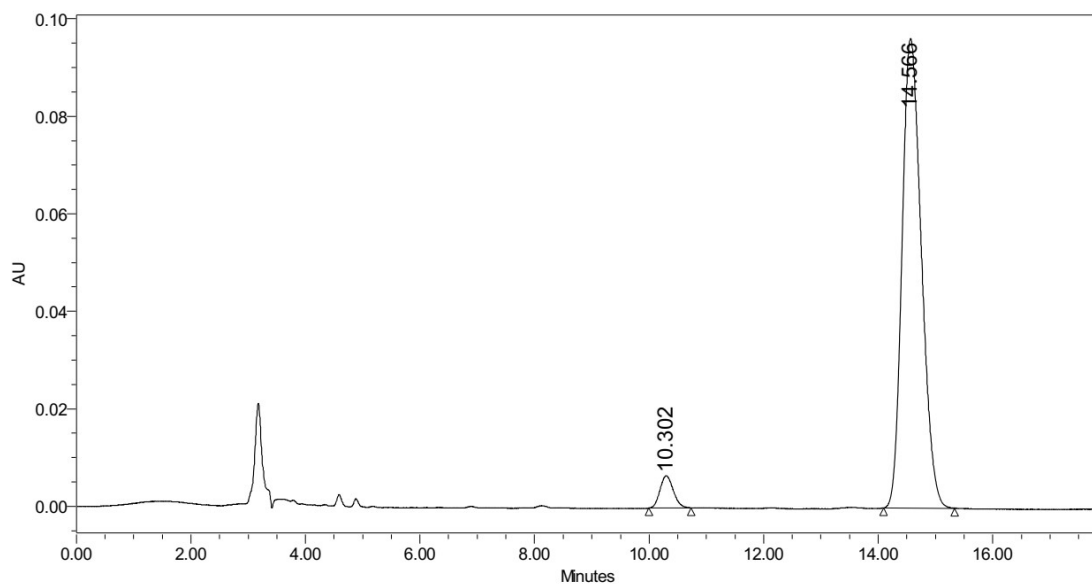

|   | RT     | Area    | % Area | Height |
|---|--------|---------|--------|--------|
| 1 | 10.302 | 106256  | 4.53   | 6603   |
| 2 | 14.566 | 2239519 | 95.47  | 96280  |

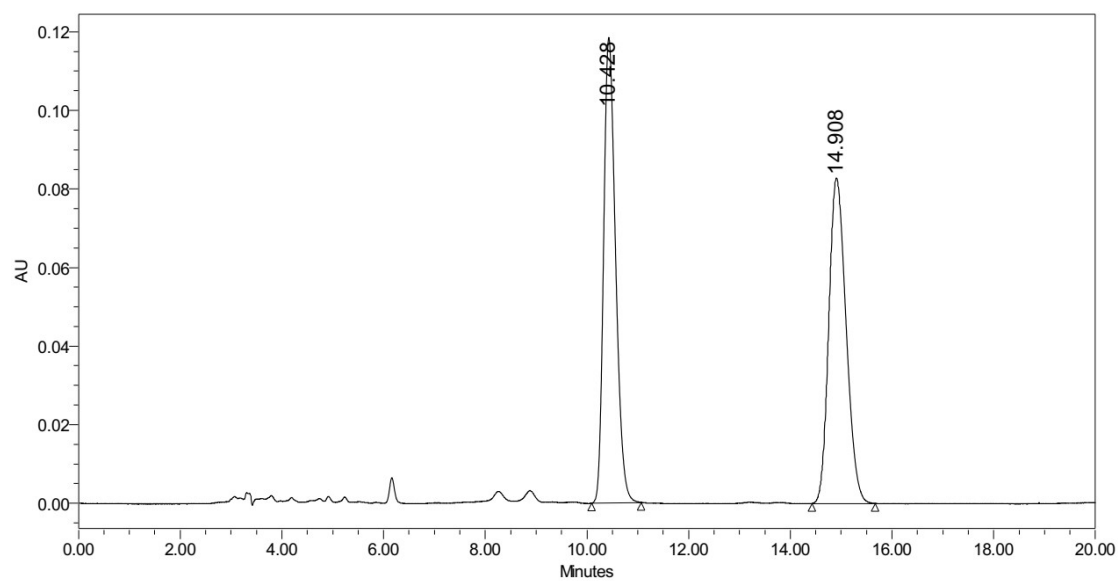

|   | RT     | Area    | % Area | Height |
|---|--------|---------|--------|--------|
| 1 | 10.428 | 1937786 | 49.83  | 118453 |
| 2 | 14.908 | 1951030 | 50.17  | 82812  |

N-((6aR,7S,11bS)-2-ethyl-6,6a,7,11b-tetrahydroindeno[2,1-c]chromen-7-yl)-4-methylbenzenesulfonamide (**4c**)

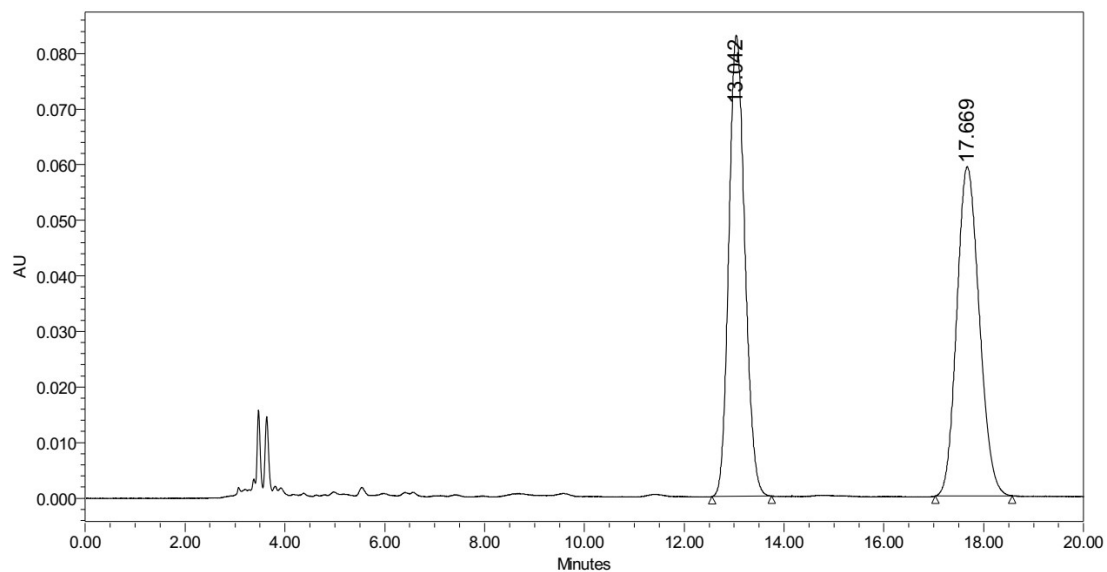

|   | RT     | Area    | % Area | Height |
|---|--------|---------|--------|--------|
| 1 | 13.042 | 1854721 | 49.94  | 82983  |
| 2 | 17.669 | 1859510 | 50.06  | 59256  |

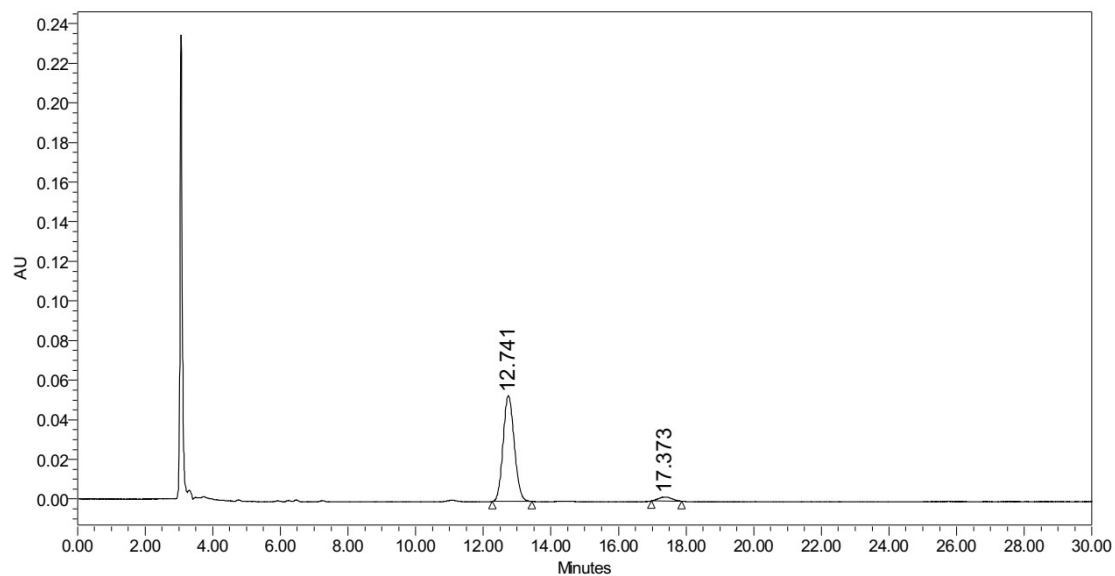

|   | RT     | Area    | % Area | Height |
|---|--------|---------|--------|--------|
| 1 | 12.741 | 1212371 | 95.49  | 53292  |
| 2 | 17.373 | 57290   | 4.51   | 2082   |

N-(((6aR,7S,11bS)-2-fluoro-6,6a,7,11b-tetrahydroindeno[2,1-c]chromen-7-yl)-4-methylbenzenesulfonamide (**4d**)

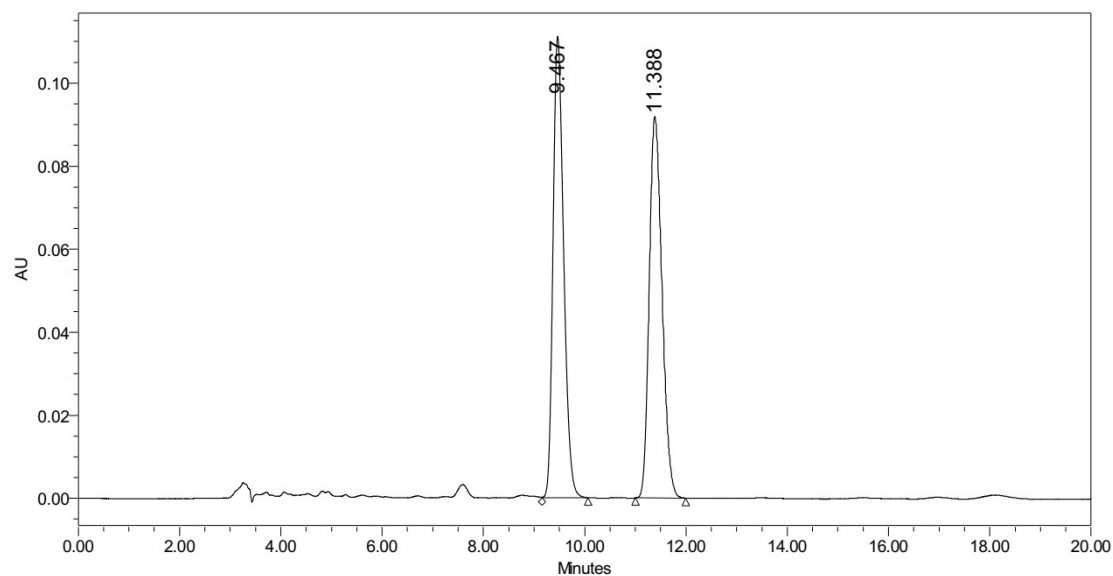

|   | RT     | Area    | % Area | Height |
|---|--------|---------|--------|--------|
| 1 | 9.467  | 1618969 | 50.31  | 111087 |
| 2 | 11.388 | 1598810 | 49.69  | 91844  |

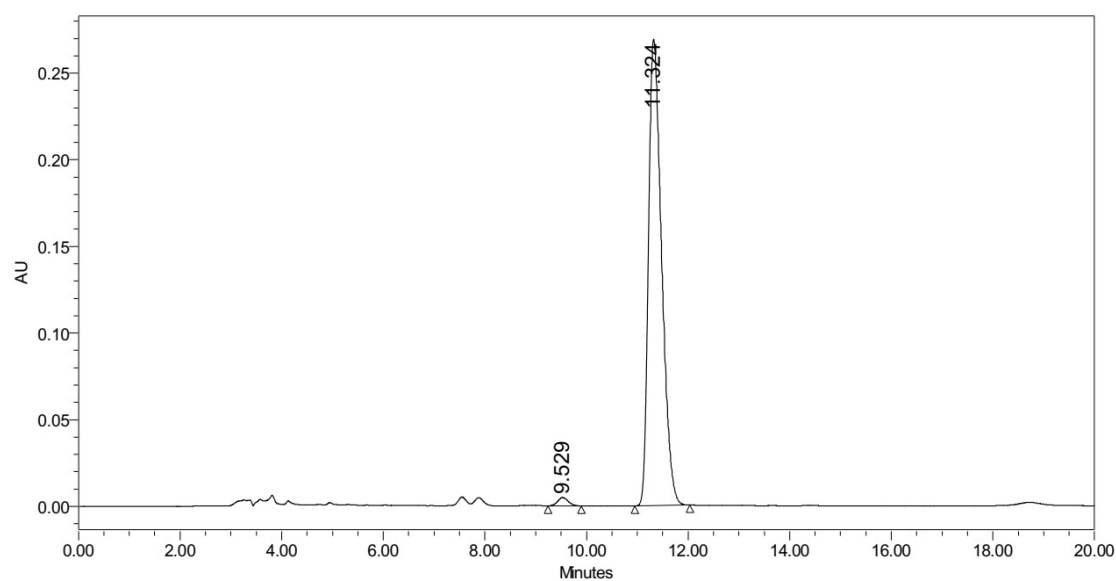

|   | RT     | Area    | % Area | Height |
|---|--------|---------|--------|--------|
| 1 | 9.529  | 69820   | 1.44   | 4789   |
| 2 | 11.324 | 4792653 | 98.56  | 269048 |

N-((6aR,7S,11bS)-2-methoxy-6,6a,7,11b-tetrahydroindeno[2,1-c]chromen-7-yl)-4-methylbenzenesulfonamide (**4e**)

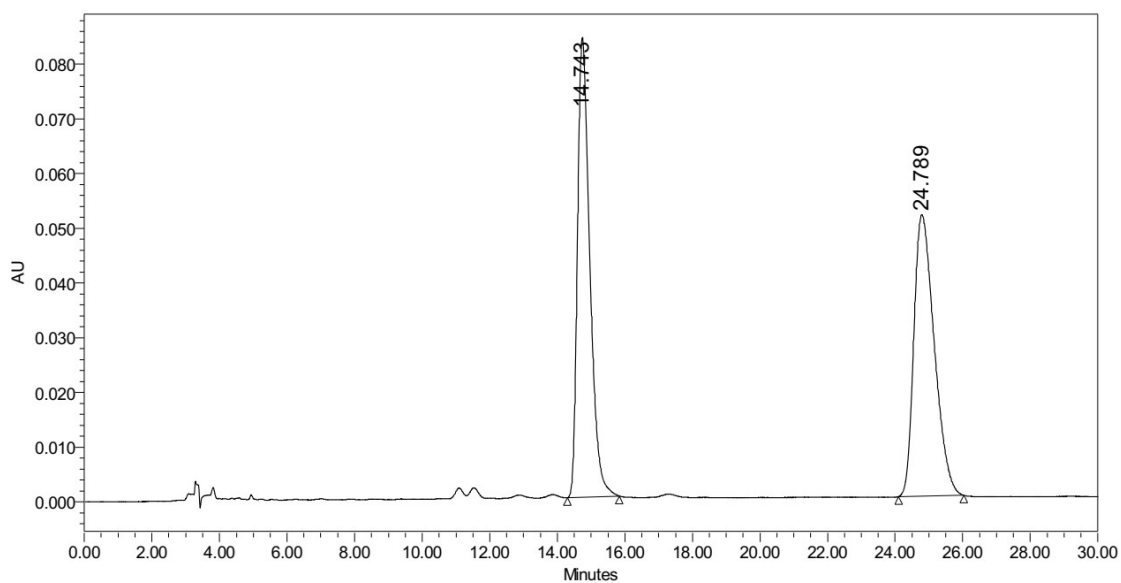

|   | RT     | Area    | % Area | Height |
|---|--------|---------|--------|--------|
| 1 | 14.743 | 2132877 | 49.71  | 83999  |
| 2 | 24.789 | 2157407 | 50.29  | 51437  |

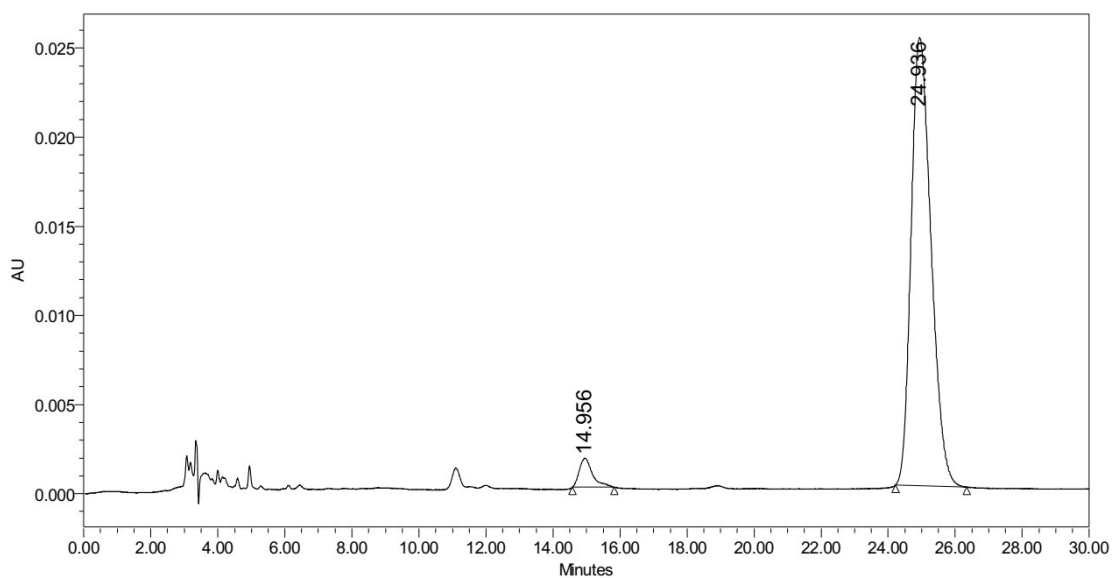

|   | RT     | Area    | % Area | Height |
|---|--------|---------|--------|--------|
| 1 | 14.956 | 44781   | 4.13   | 1625   |
| 2 | 24.936 | 1038829 | 95.87  | 25154  |



(S)-N-(2,3-dihydro-1H-inden-1-yl)-4-methylbenzenesulfonamide (5)

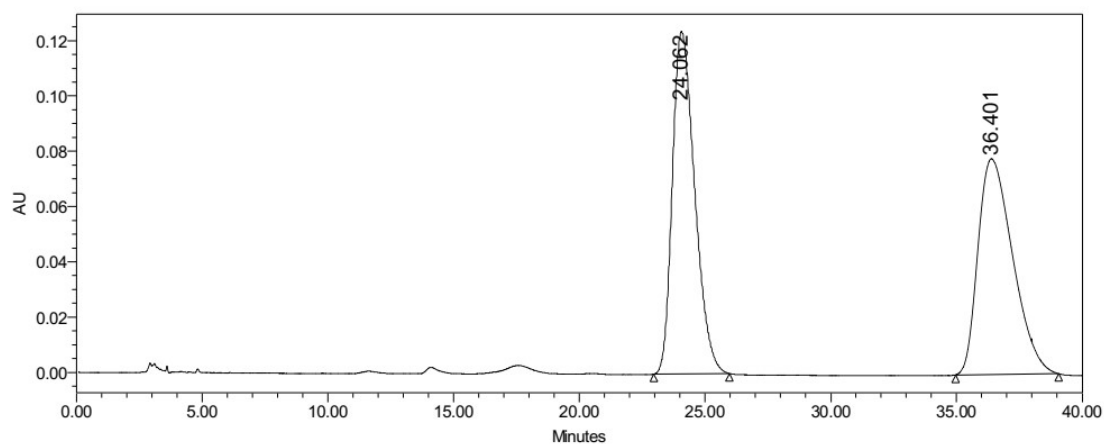

Channel: 2998 Ch1 254nm@4.8nm; Processed Channel: 2998 Ch1 254nm@4.8nm; Result Id: 2788;  
Processing Method: wx 55 rac

**Processed Channel Descr.: 2998 Ch1 254nm@4.8nm**

|   | Processed Channel Descr. | RT     | Area    | % Area | Height |
|---|--------------------------|--------|---------|--------|--------|
| 1 | 2998 Ch1 254nm@4.8nm     | 24.062 | 7659300 | 50.53  | 123865 |
| 2 | 2998 Ch1 254nm@4.8nm     | 36.401 | 7499761 | 49.47  | 78013  |

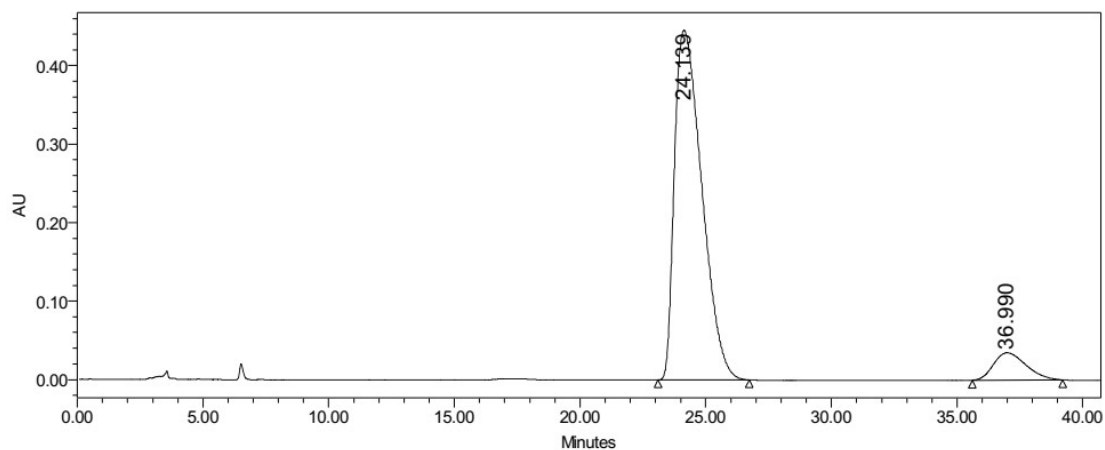

Channel: 2998 Ch1 254nm@4.8nm; Processed Channel: 2998 Ch1 254nm@4.8nm; Result Id: 2830;  
Processing Method: wx 55 asy

**Processed Channel Descr.: 2998 Ch1 254nm@4.8nm**

|   | Processed Channel Descr. | RT     | Area     | % Area | Height |
|---|--------------------------|--------|----------|--------|--------|
| 1 | 2998 Ch1 254nm@4.8nm     | 24.139 | 33645766 | 91.51  | 445588 |
| 2 | 2998 Ch1 254nm@4.8nm     | 36.990 | 3120393  | 8.49   | 34750  |

(S)-2,3-dihydro-1H-inden-1-amine (**6**)

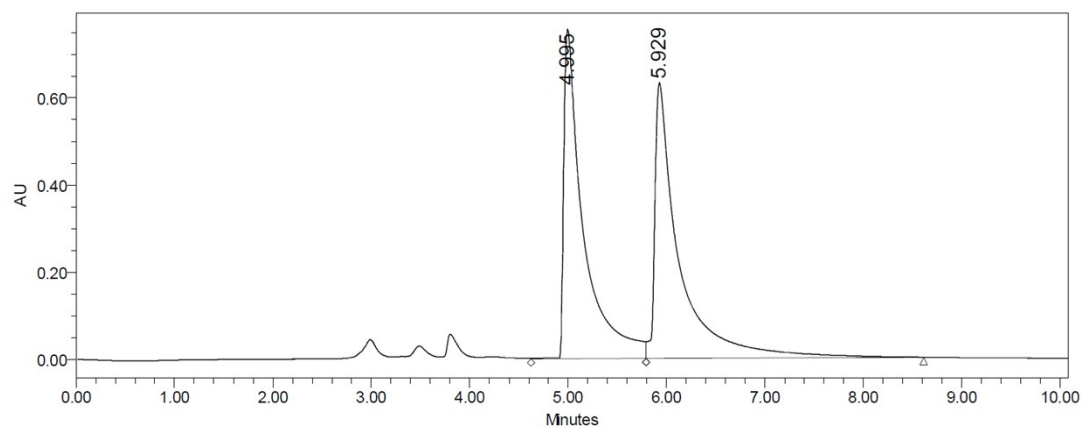

|   | RT    | Area     | % Area | Height |
|---|-------|----------|--------|--------|
| 1 | 4.995 | 10444194 | 49.05  | 757139 |
| 2 | 5.929 | 10850852 | 50.95  | 633134 |

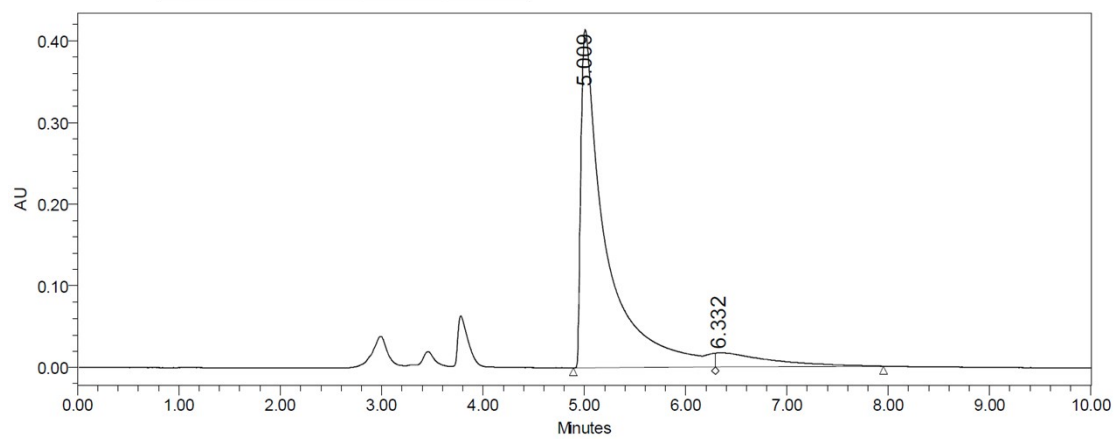

|   | RT    | Area    | % Area | Height |
|---|-------|---------|--------|--------|
| 1 | 5.009 | 7064589 | 91.65  | 414052 |
| 2 | 6.332 | 643881  | 8.35   | 17451  |

(S)-N-(prop-2-yn-1-yl)-2,3-dihydro-1H-inden-1-amine (7)

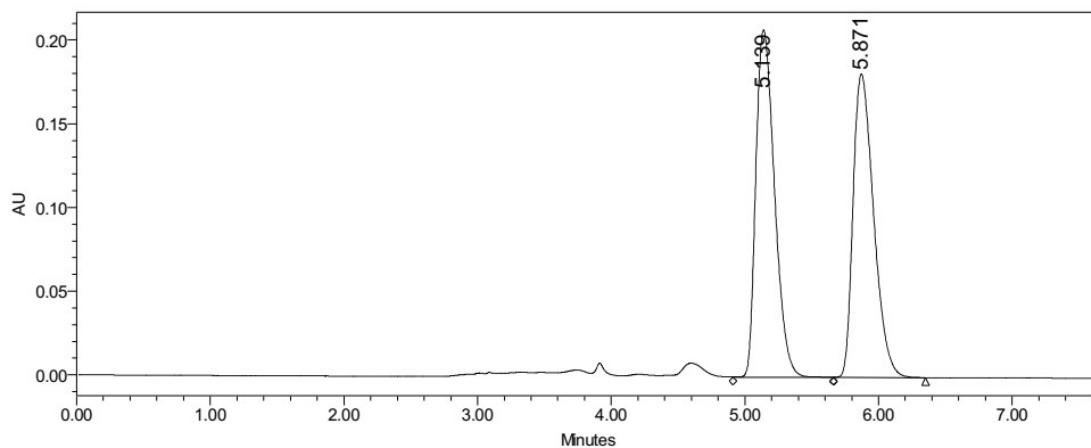

Channel: 2998 Ch1 254nm@4.8nm; Processed Channel: 2998 Ch1 254nm@4.8nm; Result Id: 2762;  
Processing Method: wx 59 rac

**Processed Channel Descr.: 2998 Ch1 254nm@4.8nm**

|   | Processed Channel Descr. | RT    | Area    | % Area | Height |
|---|--------------------------|-------|---------|--------|--------|
| 1 | 2998 Ch1 254nm@4.8nm     | 5.139 | 2012860 | 50.98  | 207478 |
| 2 | 2998 Ch1 254nm@4.8nm     | 5.871 | 1935330 | 49.02  | 181231 |

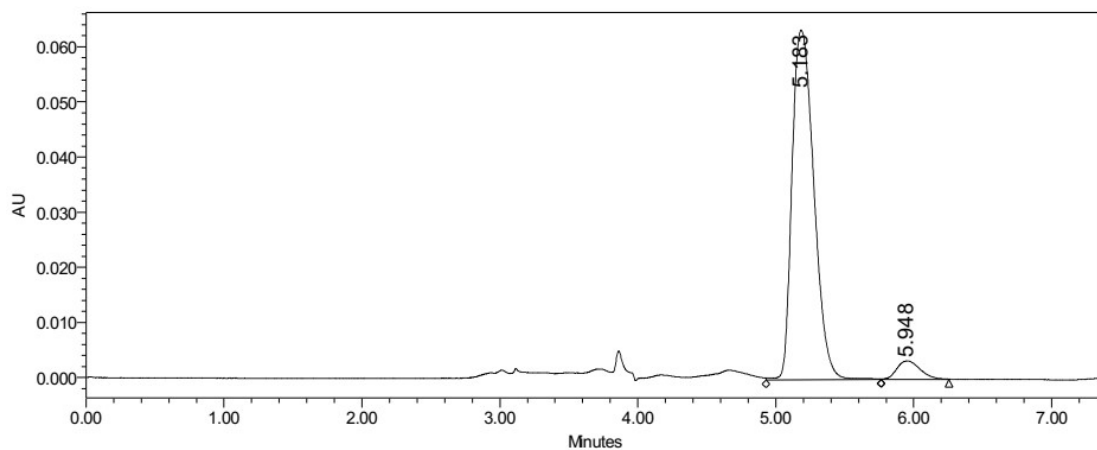

Channel: 2998 Ch1 254nm@4.8nm; Processed Channel: 2998 Ch1 254nm@4.8nm; Result Id: 2820;  
Processing Method: wx 62 asy

**Processed Channel Descr.: 2998 Ch1 254nm@4.8nm**

|   | Processed Channel Descr. | RT    | Area   | % Area | Height |
|---|--------------------------|-------|--------|--------|--------|
| 1 | 2998 Ch1 254nm@4.8nm     | 5.183 | 699202 | 94.64  | 63443  |
| 2 | 2998 Ch1 254nm@4.8nm     | 5.948 | 39572  | 5.36   | 3375   |
